# Supplementary material
Source: PubMed Central journal article supplement (PMC4380199)
Supplement: np500843m_si_001.pdf [file np500843m_si_001.pdf]

## Supporting Information

### **Cytotoxic Activity of Rearranged Drimane Meroterpenoids against Colon Cancer Cells via Down-Regulation of $\beta$ -Catenin Expression**

In Hyun Hwang,<sup>†</sup> Joonseok Oh,<sup>‡</sup> Wei Zhou,<sup>§</sup> Seoyoung Park,<sup>⊥</sup> Joo-Hyun Kim,<sup>⊥</sup> Amar G. Chittiboyina,<sup>||</sup> Daneel Ferreira,<sup>‡</sup> Gyu Yong Song,<sup>§</sup> Sangtaek Oh,<sup>\*,⊥</sup> MinKyun Na,<sup>\*,§</sup> and Mark T. Hamann<sup>\*,‡</sup>

<sup>†</sup>Department of Chemistry, University of Iowa, Iowa City, IA 52242, United States

<sup>‡</sup>Division of Pharmacognosy, Department of BioMolecular Sciences and Research Institute of Pharmaceutical Sciences, School of Pharmacy, and <sup>||</sup>National Center for Natural Products Research, The University of Mississippi, University, MS 38677, United States

<sup>§</sup>College of Pharmacy, Chungnam National University, Yuseong-gu, Daejeon 305-764, Republic of Korea

<sup>⊥</sup>Department of Bio and Fermentation Convergence Technology, Kookmin University, Seoul 136-702, Republic of Korea

# Contents

|                                                                                                          |    |
|----------------------------------------------------------------------------------------------------------|----|
| Figure S1. LC-MS analysis of the combined extract.....                                                   | 4  |
| Table S1. The Major Conformers of Compounds 1–4 and Diastereomers I-IV.....                              | 5  |
| Table S2. Experimental and Calculated Chemical Shift Values (CS) of Compounds 1 and 2.....               | 7  |
| Table S3. Experimental and Calculated CS Values of Compounds 3 and 4.....                                | 8  |
| Figure S2. CP3 analysis of compounds 1 (B) and 2 (A).....                                                | 9  |
| Figure S3. CP3 analysis of compounds 3 (B) and 4 (A).....                                                | 10 |
| Table S4. Calculated CS Values of Diastereomers I-IV Shown in Figure 5.....                              | 11 |
| Figure S4. DP4 analysis of compound 7 with diastereomers I–IV.....                                       | 12 |
| Figure S5. DP4 analysis of compound 6 with diastereomers I–IV.....                                       | 13 |
| Figure S6. DP4 analysis of compound 6 with diastereomers II–IV.....                                      | 14 |
| Figure S7. <sup>1</sup> H NMR spectrum of compound 1 in CDCl <sub>3</sub> .....                          | 15 |
| Figure S8. <sup>13</sup> C NMR spectrum of compound 1 in CDCl <sub>3</sub> .....                         | 16 |
| Figure S9. HSQC spectrum of compound 1 in CDCl <sub>3</sub> .....                                        | 17 |
| Figure S10. HMBC spectrum of compound 1 in CDCl <sub>3</sub> and its inspection.....                     | 18 |
| Figure S11. COSY spectrum of compound 1 in CDCl <sub>3</sub> .....                                       | 19 |
| Figure S12. HRFABMS analysis of compound 1.....                                                          | 20 |
| Figure S13. <sup>1</sup> H NMR spectrum of compound 2 in CDCl <sub>3</sub> .....                         | 22 |
| Figure S14. <sup>13</sup> C NMR spectrum of compound 2 in CDCl <sub>3</sub> .....                        | 23 |
| Figure S15. HSQC spectrum of compound 2 in CDCl <sub>3</sub> .....                                       | 24 |
| Figure S16. HMBC spectrum of compound 2 in CDCl <sub>3</sub> and its interpretation.....                 | 25 |
| Figure S17. COSY spectrum of compound 2 in CDCl <sub>3</sub> .....                                       | 26 |
| Figure S18. HRFABMS analysis of compound 2.....                                                          | 27 |
| Figure S19. <sup>1</sup> H NMR spectrum of a mixture of compounds 3 and 4 in CDCl <sub>3</sub> .....     | 29 |
| Figure S20. <sup>13</sup> C NMR spectrum of a mixture of compounds 3 and 4 in CDCl <sub>3</sub> .....    | 30 |
| Figure S21. HSQC spectrum of a mixture of compounds 3 and 4 in CDCl <sub>3</sub> .....                   | 31 |
| Figure S22. HMBC spectrum of a mixture of compounds 3 and 4 in CDCl <sub>3</sub> and its inspection..... | 32 |
| Figure S23. COSY spectrum of a mixture of compounds 3 and 4 in CDCl <sub>3</sub> .....                   | 33 |
| Figure S24. HRFABMS analysis of a mixture of compounds 3 and 4.....                                      | 34 |
| Figure S25. <sup>1</sup> H NMR spectrum of compound 5 in CDCl <sub>3</sub> .....                         | 36 |
| Figure S26. <sup>13</sup> C NMR spectrum of compound 5 in CDCl <sub>3</sub> .....                        | 37 |
| Figure S27. HSQC spectrum of compound 5 in CDCl <sub>3</sub> .....                                       | 38 |
| Figure S28. HMBC spectrum of compound 5 in CDCl <sub>3</sub> .....                                       | 39 |
| Figure S29. COSY spectrum of compound 5 in CDCl <sub>3</sub> .....                                       | 40 |
| Figure S30. NOESY spectrum of compound 5 in CDCl <sub>3</sub> .....                                      | 41 |

|                                                                                                                  |    |
|------------------------------------------------------------------------------------------------------------------|----|
| Figure S31. HRFABMS analysis of compound 5.....                                                                  | 42 |
| Figure S32. <sup>1</sup> H NMR spectrum of a mixture of compounds 6 and 7 in CDCl <sub>3</sub> .....             | 44 |
| Figure S33. <sup>13</sup> C NMR spectrum of a mixture of compounds 6 and 7 CDCl <sub>3</sub> .....               | 45 |
| Figure S34. HSQC spectrum of a mixture of compounds 6 and 7 in CDCl <sub>3</sub> .....                           | 46 |
| Figure S35. HMBC spectrum of a mixture of compounds 6 and 7 in CDCl <sub>3</sub> and its<br>interpretation ..... | 47 |
| Figure S36. COSY spectrum of a mixture of compounds 6 and 7 in CDCl <sub>3</sub> .....                           | 48 |
| Figure S37. NOESY spectrum of a mixture of compounds 6 and 7 in CDCl <sub>3</sub> .....                          | 49 |
| Figure S38. HRFABMS analysis of mixture of compounds 6 and 7 .....                                               | 50 |
| Figure S39. <sup>1</sup> H NMR spectrum of compound 8 in CDCl <sub>3</sub> .....                                 | 52 |
| Figure S40. <sup>13</sup> C NMR spectrum of compound 8 in CDCl <sub>3</sub> .....                                | 53 |
| Figure S41. HSQC spectrum of compound 8 in CDCl <sub>3</sub> .....                                               | 54 |
| Figure S42. HMBC spectrum of compound 8 in CDCl <sub>3</sub> .....                                               | 55 |
| Figure S43. COSY spectrum of compound 8 in CDCl <sub>3</sub> .....                                               | 56 |
| Figure S44. HRFABMS analysis of of compound 8.....                                                               | 57 |
| Cartesian coordinates of conformers shown in Table S1.....                                                       | 59 |

**Figure S1. LC-MS analysis of the combined extract of the three sponges *Smenospongia aurea*, *S. cerebriformis*, and *Verongula rigida* for the detection of unreported mass signals ( $m/z$  384.2 and 398.2)**

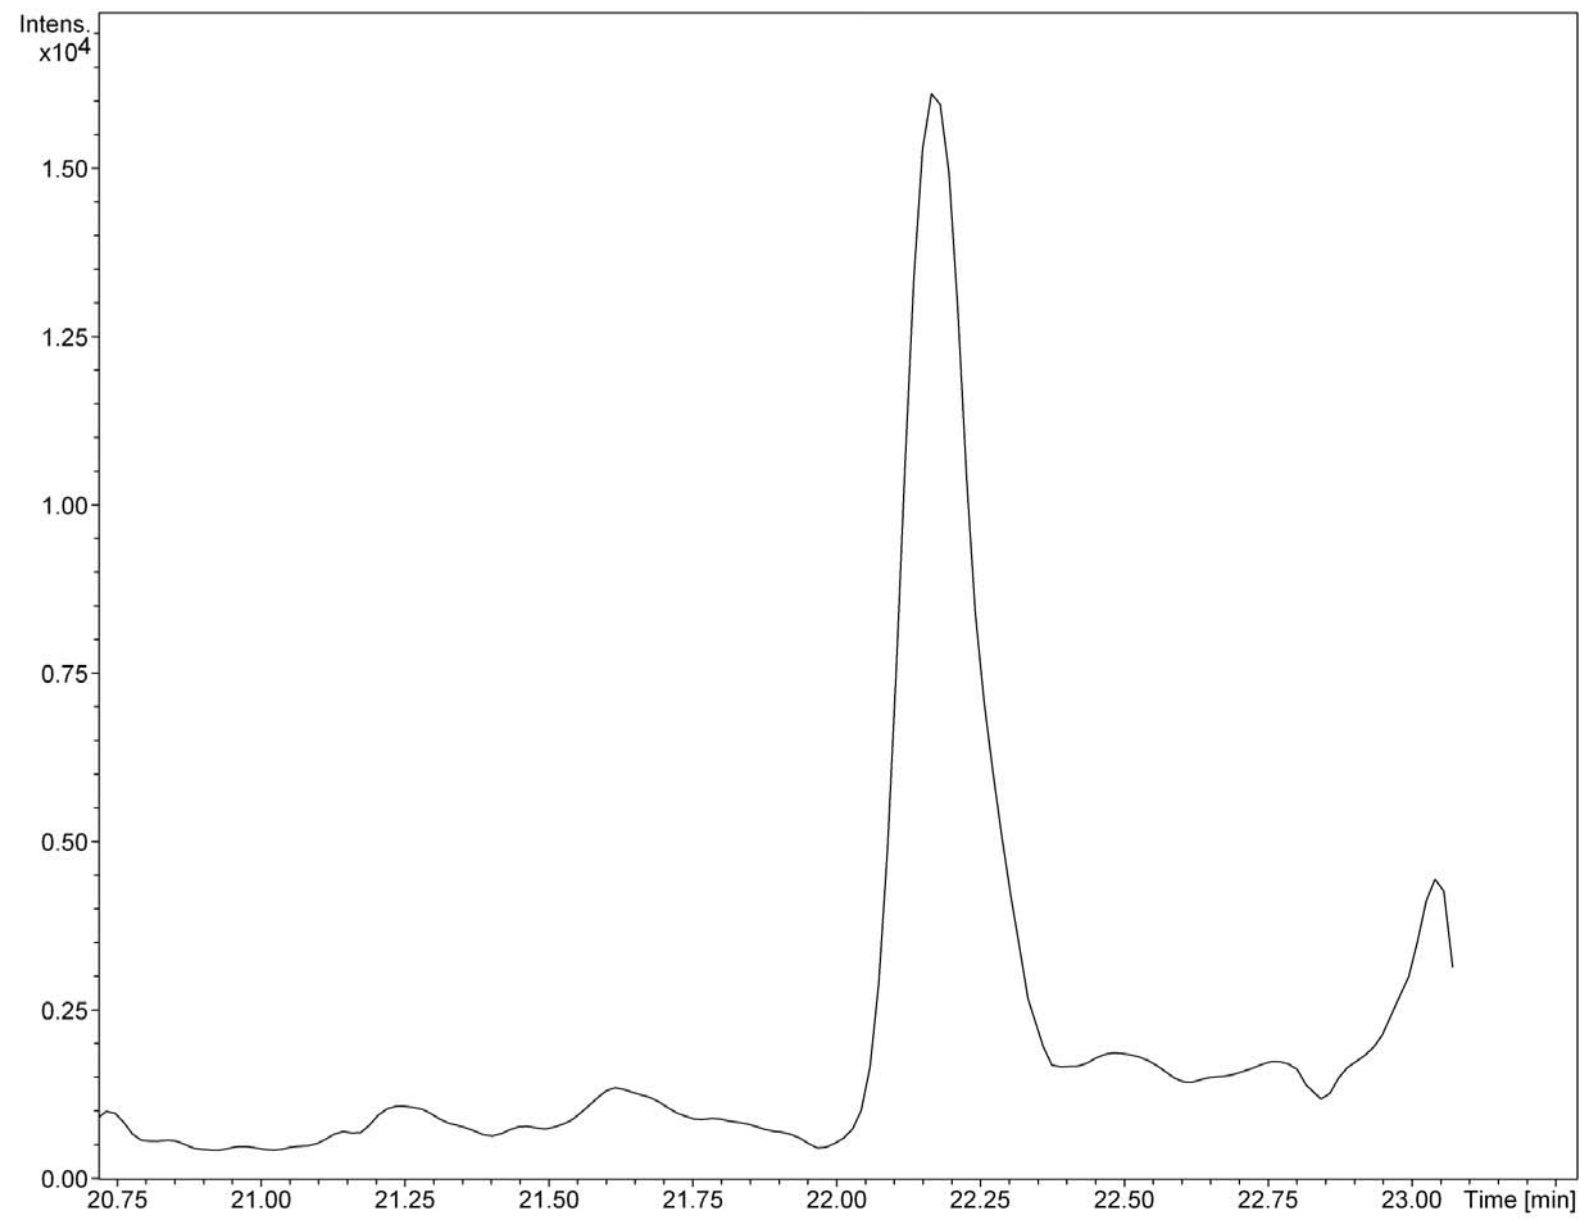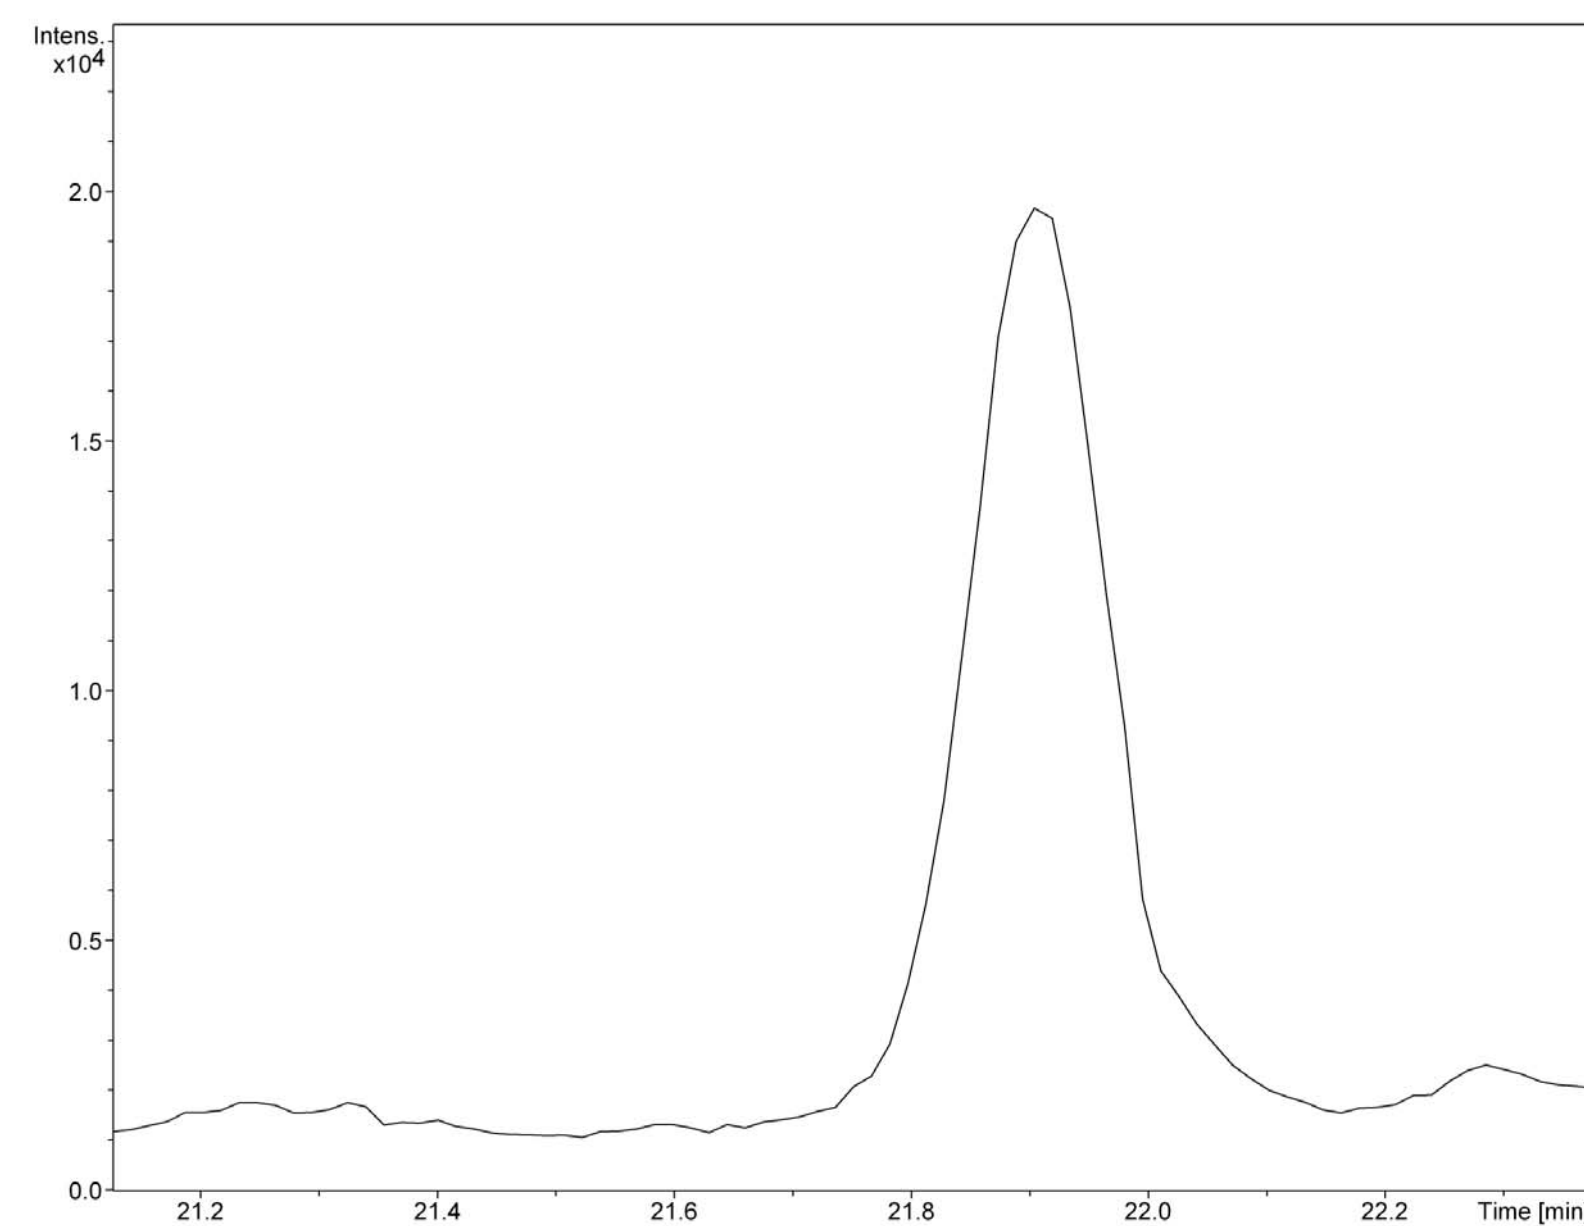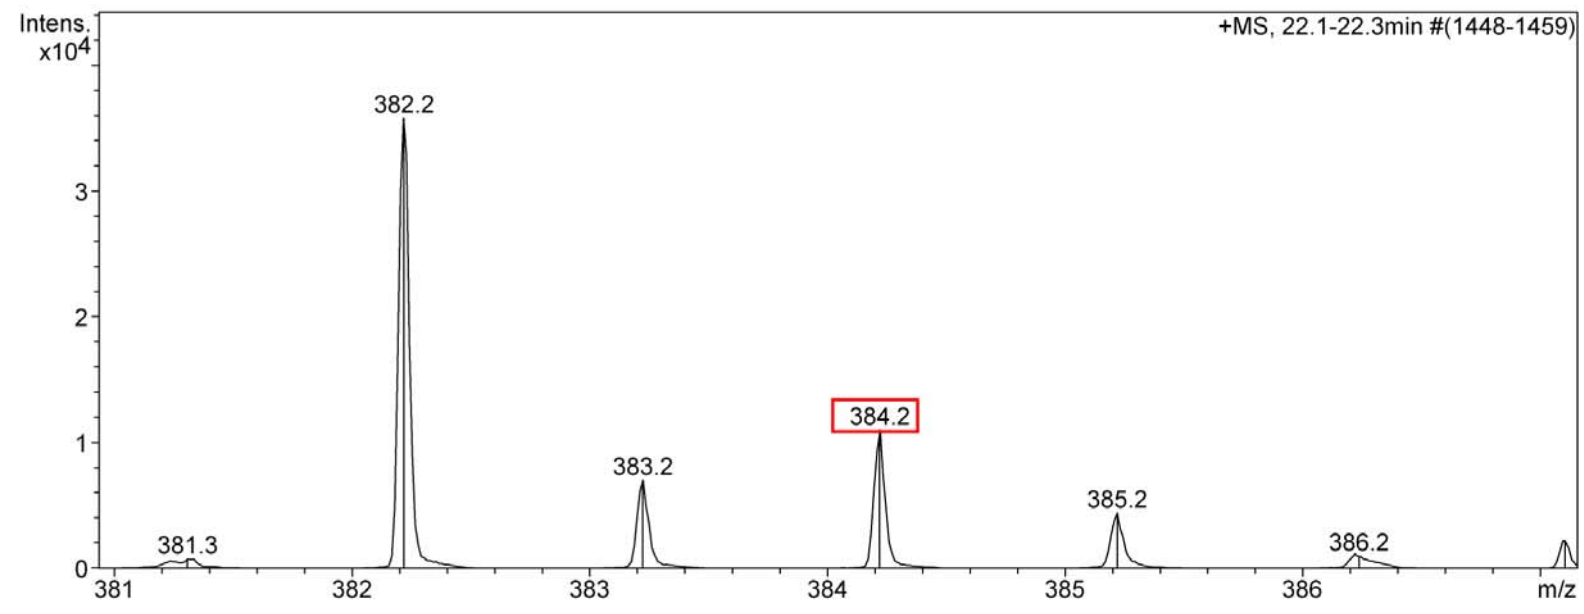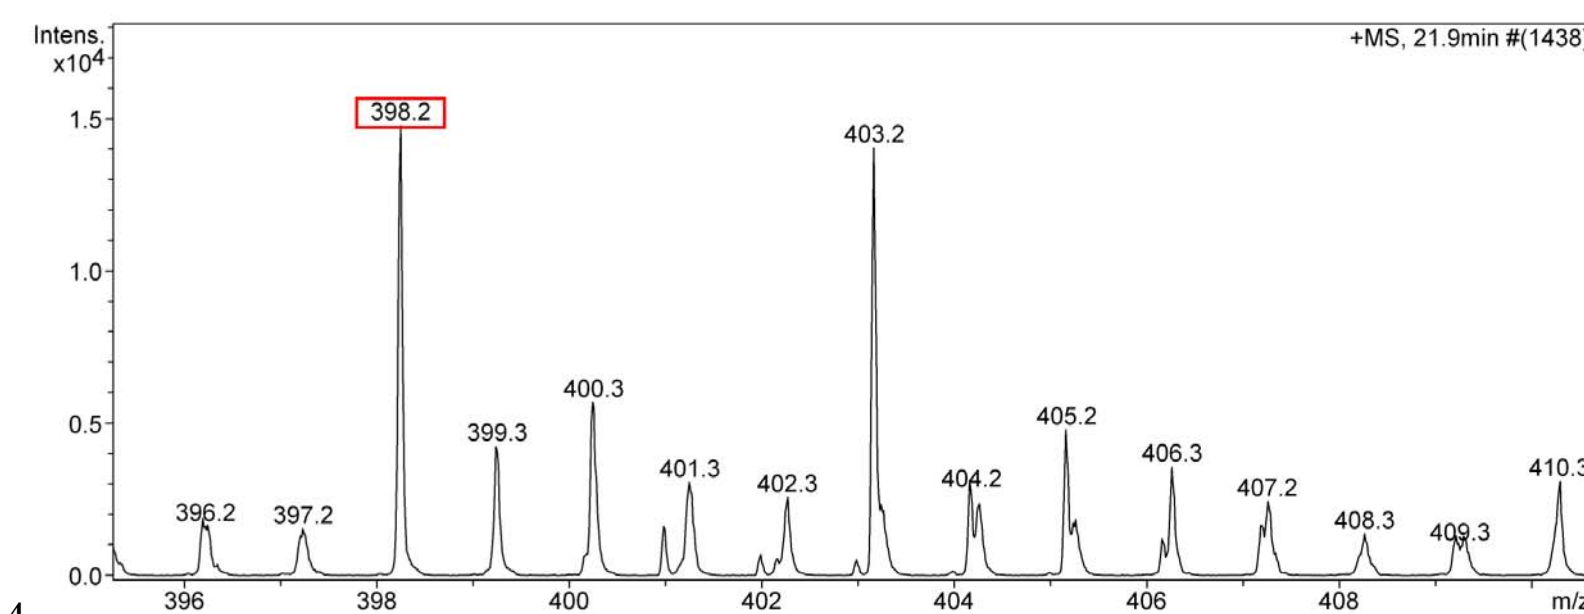



**Table S1. The Major Conformers of Compounds 1–4 and Diastereomers I-IV (see Figures 1 and 5 in the main text) Identified by Conformational Searches in MMFF94 Force Field Using the Macromodel**

| Conformers <sup>a</sup>          | Relative energy (kJ/mol) | Boltzmann population (%) <sup>b</sup> |
|----------------------------------|--------------------------|---------------------------------------|
| Compound 1_1                     | 0                        | 56.037729                             |
| Compound 1_2                     | 0.602                    | 43.962271                             |
| Compound 2_1                     | 0                        | 51.543966                             |
| Compound 2_2                     | 0.153                    | 48.456034                             |
| Compound 3_1                     | 0                        | 51.336713                             |
| Compound 3_2                     | 2.144                    | 21.612859                             |
| Compound 3_3                     | 3.226                    | 13.973626                             |
| Compound 3_4                     | 4.368                    | 8.814366                              |
| Compound 3_5                     | 7.604                    | 2.388533                              |
| Compound 3_6                     | 8.206                    | 1.873902                              |
| Compound 4_1                     | 0                        | 36.700324                             |
| Compound 4_2                     | 0.072                    | 35.646713                             |
| Compound 4_3                     | 1.408                    | 20.795324                             |
| Compound 4_4                     | 5.792                    | 3.54697                               |
| Compound 4_5                     | 5.963                    | 3.310669                              |
| Compound 7_1/Diastereomer I_1    | 0                        | 36.804449                             |
| Compound 7_2/Diastereomer I_2    | 0.695892                 | 27.795755                             |
| Compound 7_3/Diastereomer I_3    | 2.145233                 | 15.489979                             |
| Compound 7_4/Diastereomer I_4    | 4.882416                 | 5.134409                              |
| Compound 7_5/Diastereomer I_5    | 5.186493                 | 4.541669                              |
| Compound 7_6/Diastereomer I_6    | 5.698822                 | 3.693638                              |
| Compound 7_7/Diastereomer I_7    | 6.940643                 | 2.238126                              |
| Compound 7_8/Diastereomer I_8    | 7.630707                 | 1.694275                              |
| Compound 7_9/Diastereomer I_9    | 9.045135                 | 0.957575                              |
| Compound 7_10/Diastereomer I_10  | 9.136536                 | 0.92291                               |
| Compound 7_11/Diastereomer I_11  | 9.727264                 | 0.727214                              |
| Compound 6_1/Diastereomer II_1   | 0                        | 32.017963                             |
| Compound 6_2/Diastereomer II_2   | 0.62851                  | 24.8472                               |
| Compound 6_3/Diastereomer II_3   | 2.079132                 | 13.839654                             |
| Compound 6_4/Diastereomer II_4   | 4.072021                 | 6.193936                              |
| Compound 6_5/Diastereomer II_5   | 4.595612                 | 5.014557                              |
| Compound 6_6/Diastereomer II_6   | 4.980194                 | 4.29391                               |
| Compound 6_7/Diastereomer II_7   | 5.464386                 | 3.532006                              |
| Compound 6_8/Diastereomer II_8   | 5.539764                 | 3.426218                              |
| Compound 6_9/Diastereomer II_9   | 5.844849                 | 3.029448                              |
| Compound 6_10/Diastereomer II_10 | 7.599854                 | 1.492392                              |
| Compound 6_11/Diastereomer II_11 | 8.657684                 | 0.973977                              |
| Compound 6_12/Diastereomer II_12 | 9.555878                 | 0.677927                              |
| Compound 6_13/Diastereomer II_13 | 9.619263                 | 0.660812                              |
| Diastereomer III_1               | 0                        | 24.280092                             |
| Diastereomer III_2               | 0.323029                 | 21.313512                             |
| Diastereomer III_3               | 2.124298                 | 10.305491                             |

|                     |          |           |
|---------------------|----------|-----------|
| Diastereomer III_4  | 2.359467 | 9.372742  |
| Diastereomer III_5  | 3.464508 | 6.001516  |
| Diastereomer III_6  | 3.737854 | 5.374898  |
| Diastereomer III_7  | 4.721985 | 3.613669  |
| Diastereomer III_8  | 4.868011 | 3.406937  |
| Diastereomer III_9  | 5.125763 | 3.070475  |
| Diastereomer III_10 | 5.14682  | 3.044502  |
| Diastereomer III_11 | 5.94339  | 2.207779  |
| Diastereomer III_12 | 6.095245 | 2.076587  |
| Diastereomer III_13 | 6.950897 | 1.470409  |
| Diastereomer III_14 | 7.093628 | 1.388134  |
| Diastereomer III_15 | 7.535187 | 1.161634  |
| Diastereomer III_16 | 8.289703 | 0.856794  |
| Diastereomer III_17 | 9.347809 | 0.559106  |
| Diastereomer III_18 | 9.646057 | 0.495724  |
| <hr/>               |          |           |
| Diastereomer IV_1   | 0        | 21.777569 |
| Diastereomer IV_2   | 0.665497 | 16.649949 |
| Diastereomer IV_3   | 1.509735 | 11.844058 |
| Diastereomer IV_4   | 2.216461 | 8.905957  |
| Diastereomer IV_5   | 2.646759 | 7.486718  |
| Diastereomer IV_6   | 2.693665 | 7.346382  |
| Diastereomer IV_7   | 3.550049 | 5.200357  |
| Diastereomer IV_8   | 4.857391 | 3.068908  |
| Diastereomer IV_9   | 5.165039 | 2.710712  |
| Diastereomer IV_10  | 5.188477 | 2.685203  |
| Diastereomer IV_11  | 5.197205 | 2.675764  |
| Diastereomer IV_12  | 5.463776 | 2.402946  |
| Diastereomer IV_13  | 6.76709  | 1.420367  |
| Diastereomer IV_14  | 6.771423 | 1.417886  |
| Diastereomer IV_15  | 7.26001  | 1.164233  |
| Diastereomer IV_16  | 7.793915 | 0.938639  |
| Diastereomer IV_17  | 8.447083 | 0.721211  |
| Diastereomer IV_18  | 8.856262 | 0.611467  |
| Diastereomer IV_19  | 9.142761 | 0.544726  |
| Diastereomer IV_20  | 9.746643 | 0.426949  |

<sup>a</sup>See Computational Details regarding the procedures for conformational search processes. <sup>b</sup>Calculated populations based on the relative MMFF94 potential energy of each conformer

**Table S2. Experimental (Exp.) and Calculated (Cal.) Chemical Shift Values (CS,  $\delta$ ) of Compounds 1 and 2**

|                  | Exp. CS of 1 | Cal. CS of 1 | Exp. CS of 2 | Cal. CS of 2 |
|------------------|--------------|--------------|--------------|--------------|
| C-1              | 23.4         | 25.39        | 23           | 26.49        |
| C-2              | 28.9         | 30.48        | 25.3         | 27.68        |
| C-3              | 33.2         | 35.15        | 32.2         | 34.79        |
| C-4              | 160.5        | 156.5        | 153.9        | 150.81       |
| C-5              | 40.6         | 45.38        | 39.6         | 43.84        |
| C-10             | 49.4         | 49.64        | 47.6         | 48.22        |
| C-9              | 43.1         | 50.2         | 44.5         | 51.15        |
| C-8              | 37.4         | 38.63        | 38.7         | 40.16        |
| C-7              | 28.2         | 30.8         | 28           | 30.11        |
| C-6              | 36.5         | 37.1         | 37.8         | 39.53        |
| C-11             | 102.7        | 102.34       | 105.8        | 104.92       |
| C-15             | 34.6         | 35.22        | 34.7         | 35.16        |
| C-16             | 109.2        | 106.31       | 109.4        | 106.35       |
| C-17             | 143.7        | 140.76       | 143.6        | 140.73       |
| C-18             | 144.6        | 138.09       | 144.5        | 138.03       |
| C-19             | 98.8         | 97.22        | 98.8         | 97.11        |
| C-20             | 132.3        | 127.74       | 132.5        | 127.49       |
| C-21             | 146.6        | 142.63       | 146.7        | 142.97       |
| C-22             | 162          | 158.47       | 162          | 158.57       |
| C-23             | 14.6         | 14.63        | 14.6         | 14.45        |
| C-14             | 17.7         | 20.73        | 19           | 21.4         |
| C-13             | 18.5         | 21.1         | 18.8         | 21.46        |
| C-12             | 20.7         | 21.46        | 33.2         | 32.96        |
| OCH <sub>3</sub> | 56.6         | 53.75        | 56.7         | 53.72        |
| H-1a             | 2.27         | 2.49         | 1.94         | 2.1          |
| H-1b             | 1.51         | 1.69         | 2.3          | 2.62         |
| H-2a             | 1.87         | 1.78         | 1.82         | 1.97         |
| H-2b             | 1.22         | 1.38         | 1.68         | 1.6          |
| H-3a             | 2.33         | 2.47         | 2.11         | 2.13         |
| H-3b             | 2.02         | 1.95         | 2.44         | 2.58         |
| H-10             | 0.92         | 1.33         | 1.4          | 1.62         |
| H-8              | 1.4          | 1.63         | 1.33         | 1.52         |
| H-7a             | 1.39         | 1.42         | 1.17         | 1.16         |
| H-7b             | 1.39         | 1.59         | 1.5          | 1.85         |
| H-6a             | 1.19         | 1.27         | 0.93         | 0.99         |
| H-6b             | 1.43         | 1.49         | 1.92         | 2.03         |
| H-15a            | 2.89         | 3.04         | 2.83         | 3.05         |
| H-15b            | 2.8          | 3.01         | 2.96         | 3.09         |
| H-19             | 6.98         | 6.84         | 6.98         | 6.82         |
| H-23a            | 2.54         | 2.34         | 2.54         | 2.41         |
| H-23b            | 2.54         | 2.41         | 2.54         | 2.4          |
| H-23c            | 2.54         | 2.46         | 2.54         | 2.4          |
| H-14a            | 0.91         | 0.86         | 0.95         | 1.03         |
| H-14b            | 0.91         | 1.2          | 0.95         | 1.59         |
| H-14c            | 0.91         | 1.11         | 0.95         | 0.89         |
| H-13a            | 1.04         | 0.76         | 1.01         | 0.85         |
| H-13b            | 1.04         | 0.86         | 1.01         | 1.93         |
| H-13c            | 1.04         | 1.97         | 1.01         | 0.79         |
| OCH <sub>3</sub> | 3.9          | 3.76         | 3.91         | 3.9          |
| OCH <sub>3</sub> | 3.9          | 4.04         | 3.91         | 3.77         |
| OCH <sub>3</sub> | 3.9          | 3.77         | 3.91         | 3.91         |
| H-11a            | 4.32         | 4.37         | 4.66         | 4.83         |
| H-11b            | 4.36         | 4.61         | 4.69         | 5.03         |
| H-12a            | 1.04         | 0.43         | 0.98         | 1.16         |
| H-12b            | 1.04         | 1.43         | 0.98         | 0.5          |
| H-12c            | 1.04         | 1.74         | 0.98         | 1.37         |

**Table S3. Experimental (Exp.) and Calculated (Cal.) CS Values ( $\delta$ ) of Compounds 3 and 4**

|                  | Exp. CS of 3 | Cal. CS of 3 | Exp. CS of 4 | Cal. CS of 4 |
|------------------|--------------|--------------|--------------|--------------|
| C-1              | 23           | 25.19        | 22.7         | 26.23        |
| C-2              | 28.8         | 30.31        | 25.2         | 27.52        |
| C-3              | 33.2         | 35.03        | 32.2         | 34.7         |
| C-4              | 161          | 156.88       | 153.7        | 150.4        |
| C-5              | 40.5         | 45.45        | 39.6         | 43.97        |
| C-10             | 50           | 50.66        | 47.8         | 49.23        |
| C-9              | 42.9         | 50.28        | 44.2         | 51.17        |
| C-8              | 38.1         | 39.25        | 39.1         | 41.04        |
| C-7              | 28.1         | 30.64        | 28           | 30.17        |
| C-6              | 36.9         | 37.42        | 38.2         | 39.92        |
| C-11             | 102.4        | 102.18       | 105.8        | 105.2        |
| C-15             | 32.7         | 34.67        | 32.5         | 34.61        |
| C-16             | 110.3        | 114.23       | 110.1        | 114.11       |
| C-17             | 181.59       | 179.12       | 181.57       | 178.99       |
| C-18             | 158.9        | 154.8        | 158.9        | 154.57       |
| C-19             | 96.92        | 106.96       | 96.89        | 106.75       |
| C-20             | 155.6        | 155.77       | 155.6        | 155.74       |
| C-21             | 161.4        | 159.11       | 161.5        | 159.04       |
| C-22             | 116.24       | 114.66       | 116.19       | 114.68       |
| C-23             | 25.9         | 27.58        | 25.8         | 27.55        |
| C-14             | 17.5         | 20.35        | 19           | 21.09        |
| C-13             | 18           | 20.78        | 18.4         | 21.21        |
| C-12             | 20.7         | 21.43        | 33.3         | 33.25        |
| OCH <sub>3</sub> | 56.4         | 57.32        | 56.5         | 57.22        |
| H-1a             | 2.13         | 2.39         | 1.85         | 1.98         |
| H-1b             | 1.42         | 1.58         | 2.19         | 2.44         |
| H-2a             | 1.84         | 1.72         | 1.77         | 1.91         |
| H-2b             | 1.2          | 1.32         | 1.65         | 1.57         |
| H-3a             | 2.29         | 2.47         | 2.1          | 2.12         |
| H-3b             | 2.04         | 1.95         | 2.42         | 2.55         |
| H-10             | 0.8          | 1.12         | 1.17         | 1.47         |
| H-8              | 1.22         | 1.38         | 1.11         | 1.28         |
| H-7a             | 1.36         | 1.43         | 1.15         | 1.19         |
| H-7b             | 1.36         | 1.61         | 1.46         | 1.83         |
| H-6a             | 1.3          | 1.42         | 1.01         | 1.14         |
| H-6b             | 1.47         | 1.62         | 1.97         | 2.13         |
| H-15a            | 2.53         | 2.71         | 2.47         | 2.54         |
| H-15b            | 2.37         | 2.43         | 2.51         | 2.69         |
| H-19             | 6.14         | 6.36         | 6.16         | 6.36         |
| H-23a            | 1.58         | 1.05         | 1.61         | 1.83         |
| H-23b            | 1.58         | 1.82         | 1.61         | 1.69         |
| H-23c            | 1.58         | 1.7          | 1.61         | 1.06         |
| H-14a            | 0.81         | 0.74         | 0.85         | 0.94         |
| H-14b            | 0.81         | 1.12         | 0.85         | 1.51         |
| H-14c            | 0.81         | 1.03         | 0.85         | 0.77         |
| H-13a            | 0.97         | 0.76         | 0.95         | 0.68         |
| H-13b            | 0.97         | 1.79         | 0.95         | 0.76         |
| H-13c            | 0.97         | 0.7          | 0.95         | 1.86         |
| OCH <sub>3</sub> | 3.83         | 3.61         | 3.84         | 3.51         |
| OCH <sub>3</sub> | 3.83         | 3.95         | 3.84         | 4.61         |
| OCH <sub>3</sub> | 3.83         | 4.38         | 3.84         | 3.82         |
| H-11a            | 4.38         | 4.48         | 4.65         | 4.87         |
| H-11b            | 4.4          | 4.68         | 4.68         | 5.05         |
| H-12a            | 1.01         | 1.42         | 1.01         | 0.5          |
| H-12b            | 1.01         | 1.75         | 1.01         | 0.79         |
| H-12c            | 1.01         | 0.47         | 1.01         | 2.01         |
| C-24             | 26           | 27.82        | 25.8         | 27.61        |
| H-24a            | 1.6          | 1.83         | 1.61         | 1.83         |
| H-24b            | 1.6          | 1.08         | 1.61         | 1.07         |
| H-24c            | 1.6          | 1.67         | 1.61         | 1.72         |

Figure S2. CP3 analysis of compounds 1 (B) and 2 (A)

jonathan  
goodman  
  
contact us  
data  
people  
programs  
publications  
  
highlights:  
c2k  
CP3: NMR data  
DP4: NMR data  
force field  
evaluation  
InChIKey collision  
RInChI project  
solubility challenge  
  
  
wiki (intranet)

Assignment of stereochemistry and structure using NMR and CP3

Please select version of database to use:

CP3-original  
CP3-database2  
CP3-database3

Enter two 1H and 13C experimental spectra then two calculated spectra:

|            |                                                                            |
|------------|----------------------------------------------------------------------------|
| 13C Expt A | 23.00,25.30,32.20,153.90,39.60,47.60,44.50,38.70,28.00,37.80,105.80,3      |
| 13C Expt B | 3.70,144.60,98.80,132.30,146.60,162.00,14.60,17.70,18.50,56.60,20.70       |
| 13C Calc A | 26.49,27.68,34.79,150.81,43.84,48.22,51.15,40.16,30.11,39.53,104.92,3      |
| 13C Calc B | 0.76,138.09,97.22,127.74,142.63,158.47,14.63,20.73,21.10,53.75,21.46       |
| 1H Expt A  | 54.0,95.0,95.0,95.1,0.1,1.01,1.01,3.91,3.91,3.91,4.66,4.69,0.98,0.98,0.98  |
| 1H Expt B  | 54.0,91.0,91.0,91.1,0.4,1.04,1.04,3.90,3.90,3.90,4.32,4.36,1.04,1.04,1.04  |
| 1H Calc A  | 40.1,0.3,1.59,0.89,0.85,1.93,0.79,3.90,3.77,3.91,4.83,5.03,1.16,0.50,1.37  |
| 1H Calc B  | 46.0,86.1,20.1,1.11,0.76,0.86,1.97,3.76,4.04,3.77,4.37,4.61,0.43,1.43,1.74 |

CP3 thinks ExpA goes with CalcA and ExpB with CalcB:

ExpA with CalcA and ExpB with CalcB: 100.0%  
ExpA with CalcB and ExpB with CalcA: 0.0%

CP3 values:

|                         | C data | H data | All data |
|-------------------------|--------|--------|----------|
| ExpA-CalcA & ExpB-CalcB | 0.69   | 0.66   | 0.67     |
| ExpA-CalcB & ExpB-CalcA | -0.86  | -0.94  | -0.90    |

Probabilities:

|                         | C data | H data | All data |
|-------------------------|--------|--------|----------|
| ExpA-CalcA & ExpB-CalcB | 100.0% | 99.9%  | 100.0%   |
| ExpA-CalcB & ExpB-CalcA | 0.0%   | 0.1%   | 0.0%     |

Assign resonances  
Calculate  
Re-read input  
Clear text

(c) Jonathan M Goodman and Steven G Smith

Figure S3. CP3 analysis of compounds 3 (B) and 4 (A)

jonathan  
goodman

contact us  
data

people

programs

publications

highlights:

c2k

CP3: NMR data

DP4: NMR data

force field

evaluation

InChIKey collision

RInChI project

solubility challenge

wiki (intranet)

Assignment of stereochemistry and structure using NMR and CP3

Please select version of database to use:

CP3-original  
CP3-database2  
CP3-database3

Enter two <sup>1</sup>H and <sup>13</sup>C experimental spectra then two calculated spectra:

|            |                                                                           |
|------------|---------------------------------------------------------------------------|
| 13C Expt A | 58.90,96.89,155.60,161.50,116.19,25.80,19.00,18.40,56.50,33.30,25.80      |
| 13C Expt B | 58.90,96.92,155.60,161.40,116.24,25.90,17.50,18.00,56.40,20.70,26.00      |
| 13C Calc A | 4.57,106.75,155.74,159.04,114.68,27.55,21.09,21.21,57.22,33.25,27.61      |
| 13C Calc B | 4.80,106.96,155.77,159.11,114.66,27.58,20.35,20.78,57.32,27.58,21.43      |
| 1H Expt A  | 1.85,2.19,1.77,1.65,2.10,2.42,1.17,1.11,1.15,1.46,1.01,1.97,2.47,2.51,6.1 |
| 1H Expt B  | 2.13,1.42,1.84,1.20,2.29,2.04,0.80,1.22,1.36,1.36,1.30,1.47,2.53,2.37,6.1 |
| 1H Calc A  | 77,0.68,0.76,1.86,3.51,4.61,3.82,4.87,5.05,0.50,0.79,2.01,1.83,1.07,1.72  |
| 1H Calc B  | 03,0.76,1.79,0.70,3.61,3.95,4.38,4.48,4.68,1.42,1.75,0.47,1.83,1.08,1.67  |

CP3 thinks ExpA goes with CalcA and ExpB with CalcB:

ExpA with CalcA and ExpB with CalcB: 100.0%  
ExpA with CalcB and ExpB with CalcA: 0.0%

CP3 values:

|                         | C data | H data | All data |
|-------------------------|--------|--------|----------|
| ExpA-CalcA & ExpB-CalcB | 0.36   | 0.58   | 0.47     |
| ExpA-CalcB & ExpB-CalcA | -0.68  | -0.99  | -0.84    |

Probabilities:

|                         | C data | H data | All data |
|-------------------------|--------|--------|----------|
| ExpA-CalcA & ExpB-CalcB | 100.0% | 99.9%  | 100.0%   |
| ExpA-CalcB & ExpB-CalcA | 0.0%   | 0.1%   | 0.0%     |

Assign resonances

Calculate

Re-read input

Clear text

(c) Jonathan M Goodman and Steven G Smith

**Table S4. Calculated (Cal.) CS Values ( $\delta$ ) of Diastereomers I-IV Shown in Figure 5**

|                                    | Cal. CS of I | Cal. CS of II | Cal. CS of III | Cal. CS of IV |
|------------------------------------|--------------|---------------|----------------|---------------|
| C-1                                | 26.1         | 24.1          | 25.42          | 24.74         |
| C-2                                | 27.64        | 26.78         | 27.28          | 26.92         |
| C-3                                | 34.86        | 34.37         | 34.72          | 34.57         |
| C-4                                | 151.46       | 150.47        | 151.15         | 150.3         |
| C-5                                | 44.31        | 43.89         | 44.1           | 43.92         |
| C-10                               | 49.09        | 47.93         | 49.8           | 49.2          |
| C-9                                | 48.74        | 48.61         | 48.93          | 49.01         |
| C-8                                | 40.42        | 40.16         | 40.73          | 41.2          |
| C-7                                | 29.64        | 30.01         | 29.76          | 29.89         |
| C-6                                | 40.29        | 39.8          | 40.32          | 40.29         |
| C-11                               | 104.79       | 105.3         | 104.83         | 105.54        |
| C-15                               | 39.4         | 39.29         | 38.17          | 37.96         |
| C-16                               | 54.13        | 54.31         | 48.44          | 48.86         |
| C-20                               | 199.66       | 199.17        | 202.52         | 202.56        |
| C-19                               | 150.29       | 150.46        | 149.45         | 149.16        |
| C-14                               | 21.06        | 21.16         | 20.93          | 21.02         |
| C-13                               | 18.64        | 19.66         | 19.44          | 19.2          |
| OCH <sub>3</sub>                   | 55.51        | 55.56         | 55.29          | 55.38         |
| H-1a                               | 2.28         | 1.6           | 2.25           | 1.81          |
| H-1b                               | 2.41         | 1.94          | 2.26           | 1.82          |
| H-2a                               | 1.81         | 1.8           | 1.87           | 1.88          |
| H-2b                               | 1.58         | 1.46          | 1.58           | 1.49          |
| H-3a                               | 2.11         | 2.11          | 2.13           | 2.12          |
| H-3b                               | 2.6          | 2.62          | 2.61           | 2.55          |
| H-10                               | 1.66         | 1.77          | 1.71           | 1.16          |
| H-8                                | 1.59         | 1.43          | 1.16           | 1.48          |
| H-7a                               | 1.2          | 1.29          | 1.13           | 1.26          |
| H-7b                               | 1.9          | 1.87          | 1.89           | 1.89          |
| H-6a                               | 1.34         | 1.38          | 1.23           | 1.24          |
| H-6b                               | 2.24         | 2.21          | 2.21           | 2.21          |
| H-15a                              | 2.06         | 2.16          | 2.26           | 2.41          |
| H-15b                              | 1.18         | 1.2           | 1.78           | 1.86          |
| H-14a                              | 0.67         | 0.83          | 0.76           | 0.86          |
| H-14b                              | 1.59         | 1.6           | 1.57           | 1.56          |
| H-14c                              | 0.61         | 0.46          | 0.7            | 0.62          |
| H-13a                              | 0.67         | 0.78          | 0.6            | 0.77          |
| H-13b                              | 1.01         | 1.87          | 0.83           | 1.72          |
| H-13c                              | 0.76         | 0.64          | 0.81           | 0.71          |
| OCH <sub>3</sub>                   | 4.08         | 4.1           | 3.58           | 4.27          |
| OCH <sub>3</sub>                   | 4.48         | 3.53          | 4.32           | 4             |
| OCH <sub>3</sub>                   | 3.55         | 4.46          | 4.14           | 3.79          |
| H-11a                              | 4.85         | 4.92          | 4.85           | 4.91          |
| H-11b                              | 5.02         | 5.03          | 5.04           | 5.05          |
| C-12                               | 33.14        | 32.88         | 33.15          | 33.14         |
| H-12a                              | 0.68         | 0.75          | 0.65           | 0.55          |
| H-12b                              | 0.89         | 0.84          | 0.82           | 0.82          |
| H-12c                              | 2.08         | 2.07          | 2.16           | 2.01          |
| C-18                               | 132.16       | 132.17        | 133.42         | 133.59        |
| C-17                               | 82.99        | 82.98         | 77.75          | 77.86         |
| C-21                               | 174.22       | 174.35        | 175.78         | 176.01        |
| OCH <sub>2</sub> CH <sub>3</sub>   | 60.78        | 60.86         | 60.59          | 60.89         |
| OCH <sub>2</sub> CH <sub>3</sub>   | 15.69        | 15.62         | 15.75          | 15.81         |
| H-16                               | 2.81         | 2.74          | 2.57           | 2.64          |
| H-18                               | 6.03         | 6.01          | 6.1            | 6.06          |
| OCH <sub>2a</sub> CH <sub>3</sub>  | 4.26         | 4.29          | 4.35           | 4.31          |
| OCH <sub>2b</sub> CH <sub>3</sub>  | 4.15         | 4.15          | 4.16           | 4.2           |
| OCH <sub>2c</sub> CH <sub>3a</sub> | 0.94         | 1.35          | 1.04           | 1.1           |
| OCH <sub>2c</sub> CH <sub>3b</sub> | 1.31         | 1.31          | 1.38           | 1.29          |
| OCH <sub>2c</sub> CH <sub>3c</sub> | 1.33         | 0.94          | 1.34           | 1.42          |

Figure S4. DP4 analysis of compound 7 with diastereomers I–IV<sup>a</sup>

Assignment of stereochemistry and structure using NMR and DP4

Please select version of database to use:  
DP4-original  
DP4-database2

Select probability distribution:  
 t distribution (recommended)  
 normal distribution

**<sup>13</sup>C Calc:**  
C1,C2,C3,C4,C5,C6,C7,C8,C9,C10,C11,C12,C13,1  
26.10,27.64,34.86,151.46,44.31,49.09,48.74,40.42  
24.10,26.78,34.37,150.47,43.89,47.93,48.61,40.16  
25.42,27.28,34.72,151.15,44.10,49.80,48.93,40.73  
24.74,26.92,34.57,150.30,43.92,49.20,49.01,41.20

**<sup>1</sup>H Calc:**  
H1,H2,H3,H4,H5,H6,H7,H8,H9,H10,H11,H12,H13,1  
2.28,2.41,1.81,1.58,2.11,2.60,1.66,1.59,1.20,1.90,1  
1.60,1.94,1.80,1.46,2.11,2.62,1.77,1.43,1.29,1.87,1  
2.25,2.26,1.87,1.58,2.13,2.61,1.71,1.16,1.13,1.89,1  
1.81,1.82,1.88,1.49,2.12,2.55,1.16,1.48,1.26,1.89,1

**<sup>13</sup>C Expt:**  
21.52(C1),24.83(C2),31.96(C3),153.94(C4),39.51(C5)

**<sup>1</sup>H Expt:**  
1.91(H1),2.14(H2),1.74(H3),1.66(H4),2.11(H5),2.45(H6)

Read Data Show Assignments Calculate Clear

WARNING: One or more of the carbon shifts have large errors (largest error 11.7 ppm).  
DP4 calculation has been attempted anyway, but you may wish to check the input data.  
To check the assignments, click Show Assignments.

This calculation will use the DP4-database2 version of the database and the t distribution.  
(To change these options select the desired database and distribution from the menus at the top of the applet and then click Calculate).

Results of DP4 using both carbon and proton data:  
Isomer 1: 100.0%  
Isomer 2: 0.0%  
Isomer 3: 0.0%  
Isomer 4: 0.0%

(c) Jonathan M Goodman and Steven G Smith

<sup>a</sup>Isomers 1–4 in the analysis are structurally equivalent to diastereomers I–IV (see Figure 5) and experimental CS data shown here are for compound 7.



Figure S5. DP4 analysis of compound 6 with diastereomers I–IV<sup>a</sup>

the goodman group  
university of cambridge

about us  
contact us  
interesting stuff  
people  
photos  
research  
tools  
publications  
Chemical Informatics  
Letters  
  
DP4 NMR  
assignment  
instructions  
step 1  
step 2  
step 3  
step 4  
applet source code  
  
Other NMR  
parameters:  
CP3

### Assignment of stereochemistry and structure using NMR and DP4

Please select version of database to use:

DP4-original  
DP4-database2

Select probability distribution:

t distribution (recommended)  
 normal distribution

**13C Calc:**

C1,C2,C3,C4,C5,C6,C7,C8,C9,C10,C11,C12,C13,  
26.10,27.64,34.86,151.46,44.31,49.09,48.74,40.42  
24.10,26.78,34.37,150.47,43.89,47.93,48.61,40.16  
25.42,27.28,34.72,151.15,44.10,49.80,48.93,40.73  
24.74,26.92,34.57,150.30,43.92,49.20,49.01,41.20

**1H Calc:**

H29,H30,H31,H32,H33,H34,H35  
2,0.68,0.89,2.08,2.81,6.03,4.26,4.15,0.94,1.31,1.33  
3,0.75,0.84,2.07,2.74,6.01,4.29,4.15,1.35,1.31,0.94  
4,0.65,0.82,2.16,2.57,6.10,4.35,4.16,1.04,1.38,1.34  
5,0.55,0.82,2.01,2.64,6.06,4.31,4.20,1.10,1.29,1.42

**13C Expt:**

21.62(C1),24.73(C2),32.07(C3),153.50(C4),39.44(C5)

**1H Expt:**

26(H31),4.17(H32),1.21(H33),1.21(H34),1.21(H35)

Read Data Show Assignments Calculate Clear

WARNING: One or more of the carbon shifts have large errors (largest error 11.6 ppm).  
DP4 calculation has been attempted anyway, but you may wish to check the input data.  
To check the assignments, click Show Assignments.

This calculation will use the DP4-database2 version of the database and the t distribution.  
(To change these options select the desired database and distribution from the menus at the top of the applet and then click Calculate).

Results of DP4 using both carbon and proton data:

Isomer 1: 20.8%  
Isomer 2: 79.2%  
Isomer 3: 0.0%  
Isomer 4: 0.0%

(c) Jonathan M Goodman and Steven G Smith

<sup>a</sup>Isomers 1–4 in the DP4 result are indicating diastereomers I–IV (see Figure 5) and experimental CS data shown in the analysis are corresponding to those for compound 6.

Figure S6. DP4 analysis of compound 6 with diastereomers II–IV<sup>a</sup>

about us  
contact us  
interesting stuff  
people  
photos  
research  
tools  
publications  
Chemical Informatics  
Letters

DP4 NMR  
assignment  
instructions  
step 1  
step 2  
step 3  
step 4  
applet source code

Other NMR  
parameters:  
CP3

### Assignment of stereochemistry and structure using NMR and DP4

Please select version of database to use:  
DP4-original  
DP4-database2

Select probability distribution:  
 t distribution (recommended)  
 normal distribution

**13C Calc:**  
C1,C2,C3,C4,C5,C6,C7,C8,C9,C10,C11,C12,C13,  
24.10,26.78,34.37,150.47,43.89,47.93,48.61,40.16  
25.42,27.28,34.72,151.15,44.10,49.80,48.93,40.73  
24.74,26.92,34.57,150.30,43.92,49.20,49.01,41.20

**1H Calc:**  
H1, H2, H3, H4, H5, H6, H7, H8, H9, H10, H11, H12  
1.60,1.94,1.80,1.46,2.11,2.62,1.77,1.43,1.29,1.87,1  
2.25, 2.26, 1.87, 1.58, 2.13, 2.61, 1.71, 1.16, 1.13, 1  
1.81,1.82,1.88,1.49,2.12,2.55,1.16,1.48,1.26,1.89,1

**13C Expt:**  
21.62(C1),24.73(C2),32.07(C3),153.50(C4),39.44(C5)

**1H Expt:**  
1.54(H1),1.81(H2),1.72(H3),1.61(H4),2.09(H5),2.44(H6)

Read Data Show Assignments Calculate Clear

WARNING: One or more of the carbon shifts have large errors (largest error 11.6 ppm).  
DP4 calculation has been attempted anyway, but you may wish to check the input data.  
To check the assignments, click Show Assignments.

This calculation will use the DP4-database2 version of the database and the t distribution.  
(To change these options select the desired database and distribution from the menus at the top of the applet and then click Calculate).

Results of DP4 using both carbon and proton data:  
Isomer 1: 100.0%  
Isomer 2: 0.0%  
Isomer 3: 0.0%

Results of DP4 using the carbon data only:

(c) Jonathan M Goodman and Steven G Smith

<sup>a</sup>The structures of Isomers 1–3 in the analysis are identical to those of diastereomers II–IV (see Figure 5) and experimental CS data of compound 6 are used for this DP4 analysis.

Figure S7. <sup>1</sup>H NMR spectrum of compound 1 in CDCl<sub>3</sub> (600 MHz)

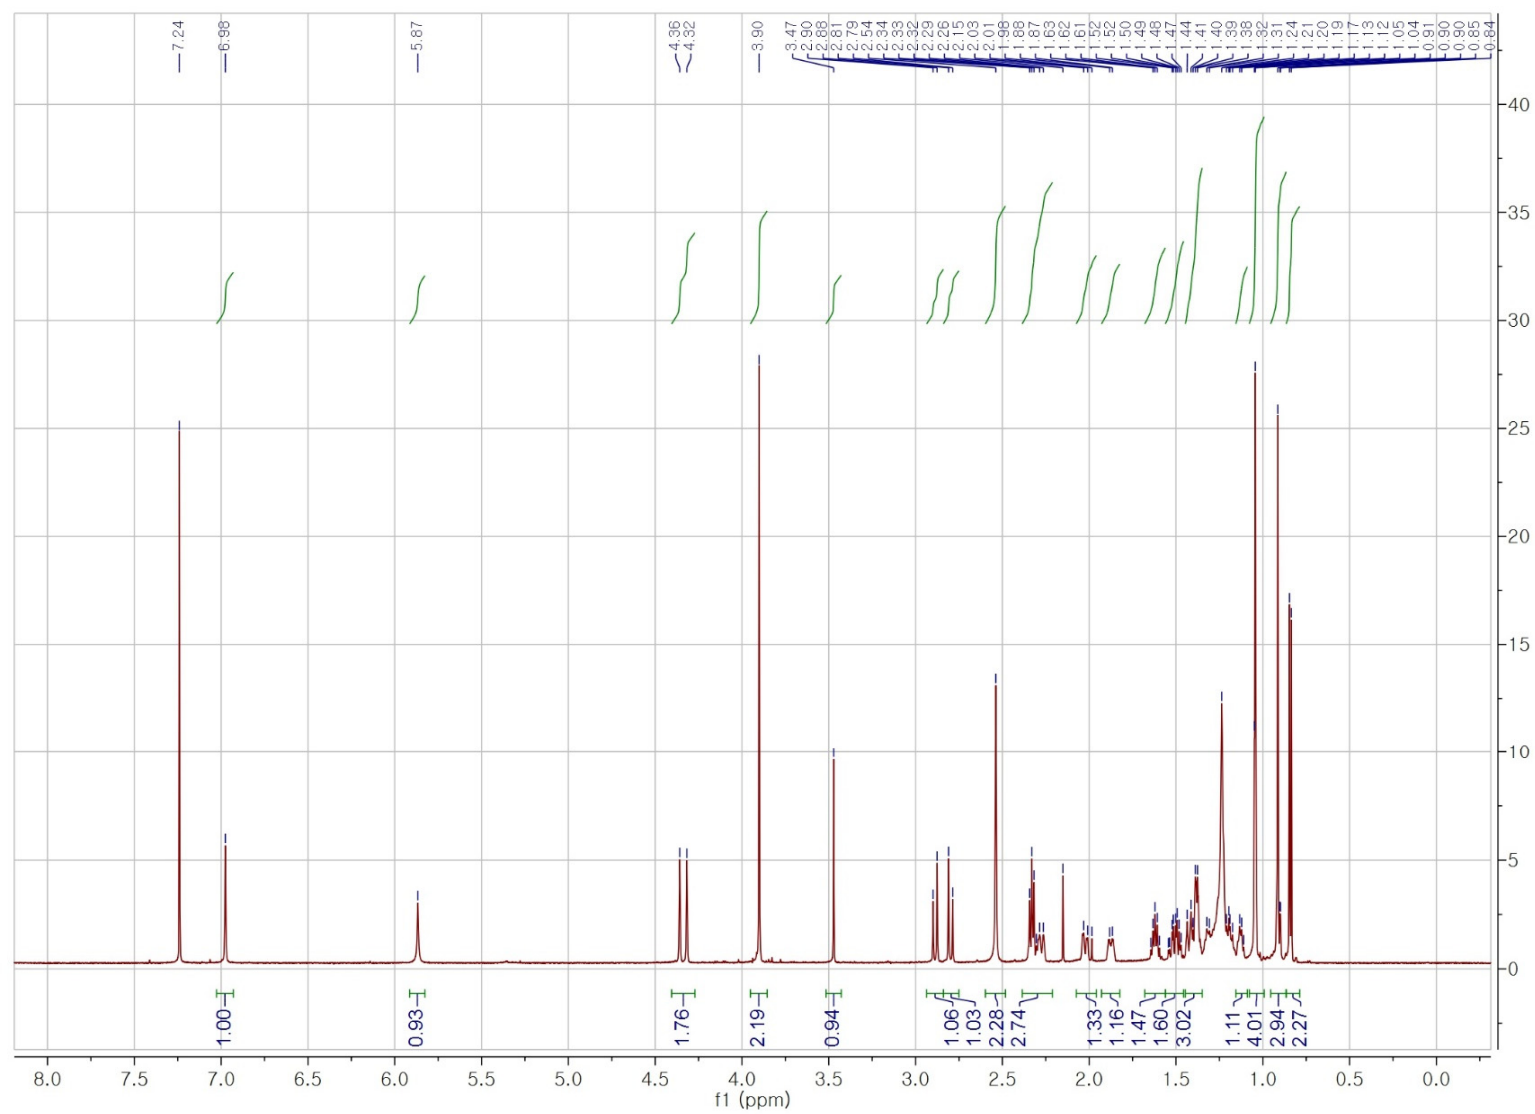

Figure S8.  $^{13}\text{C}$  NMR spectrum of compound 1 in  $\text{CDCl}_3$  (150 MHz)

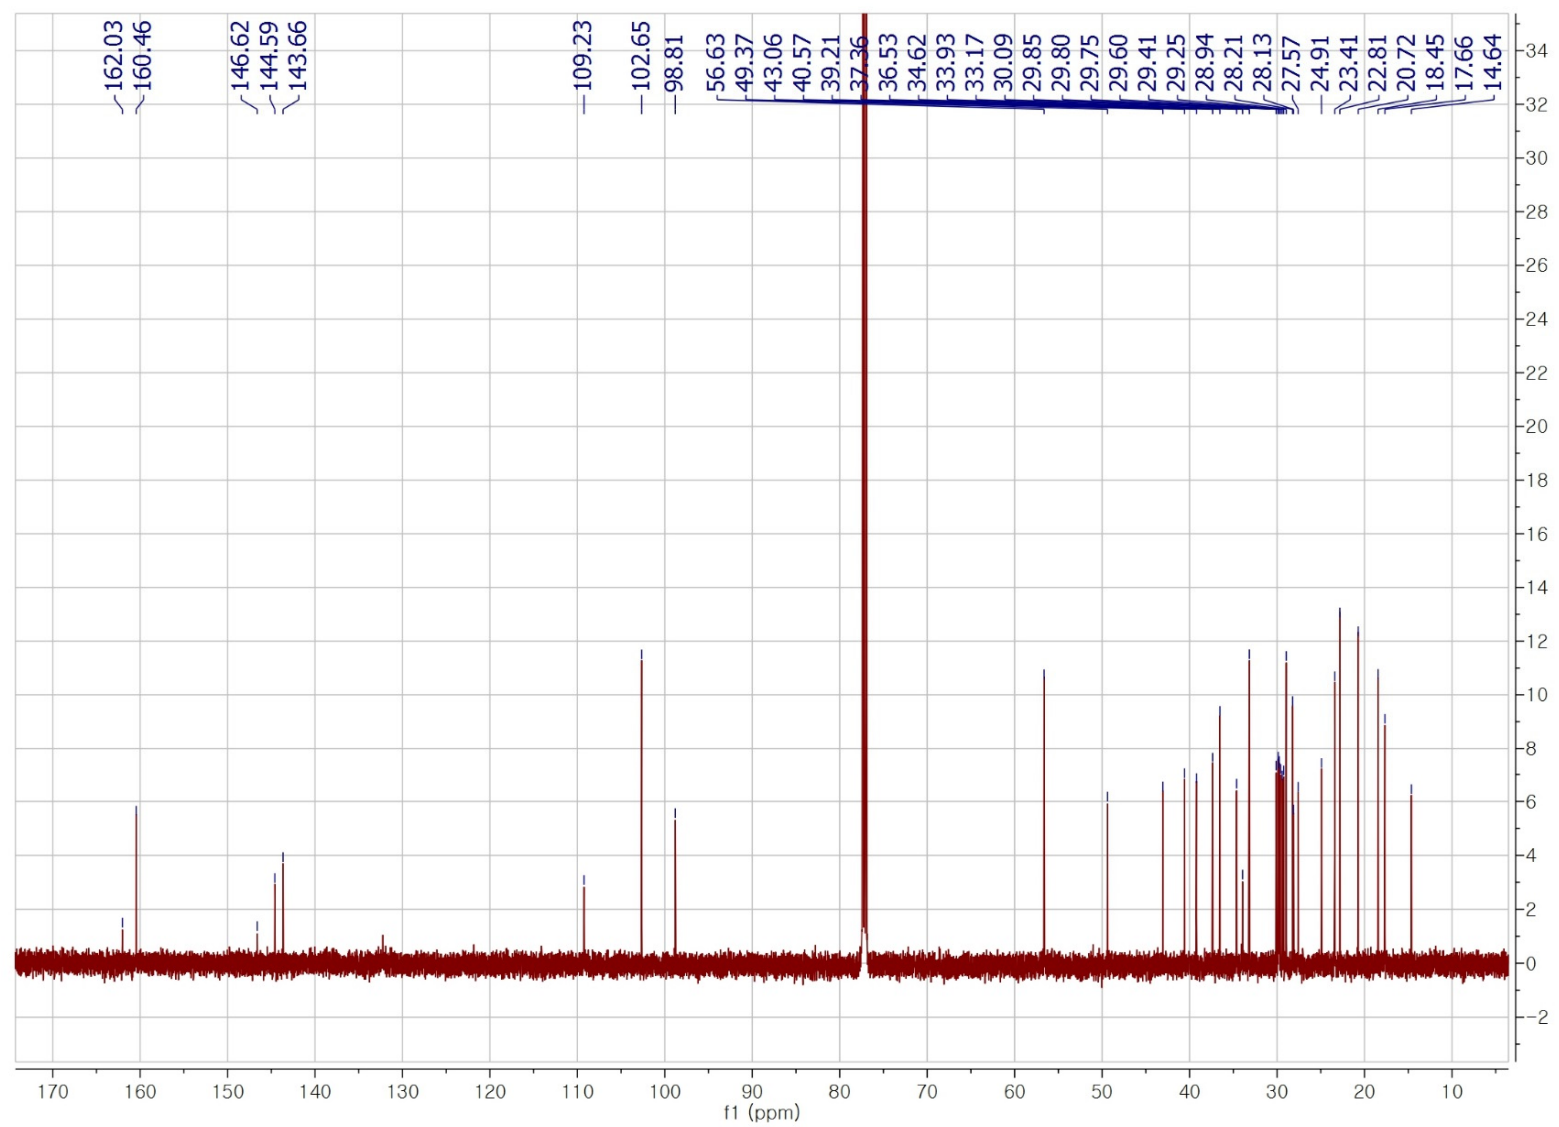

Figure S9. HSQC spectrum of compound 1 in CDCl<sub>3</sub>

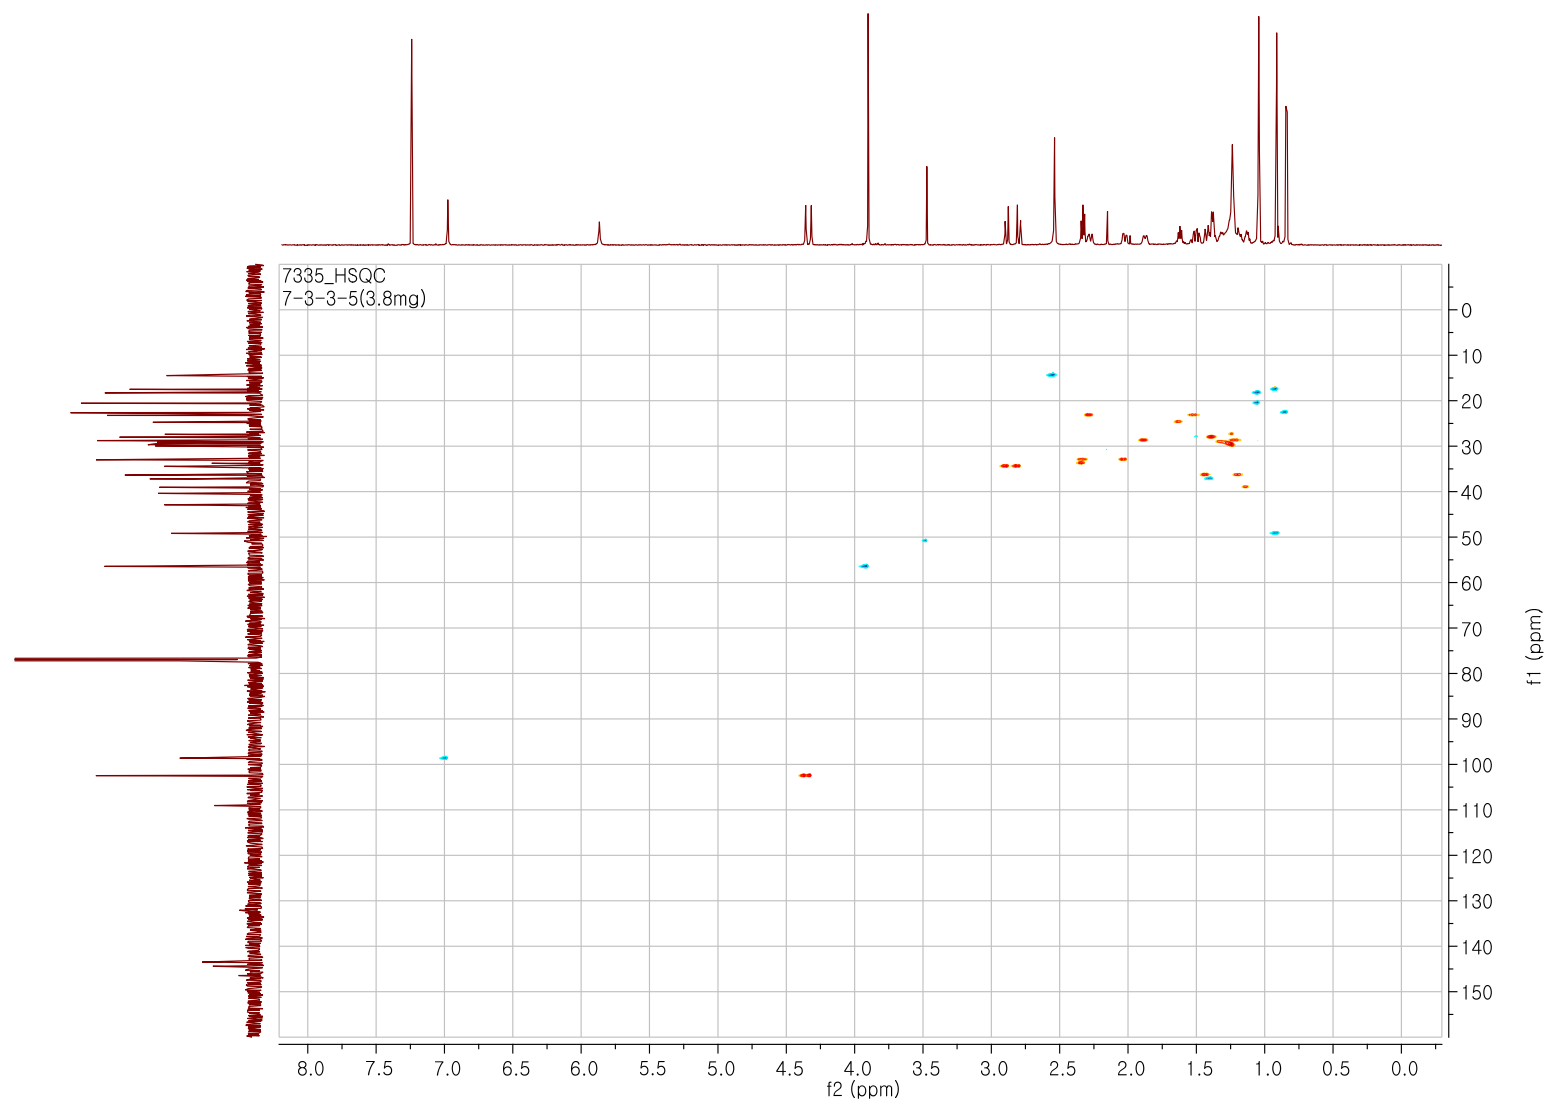

Figure S10. HMBC spectrum of compound 1 in CDCl<sub>3</sub> and its inspection

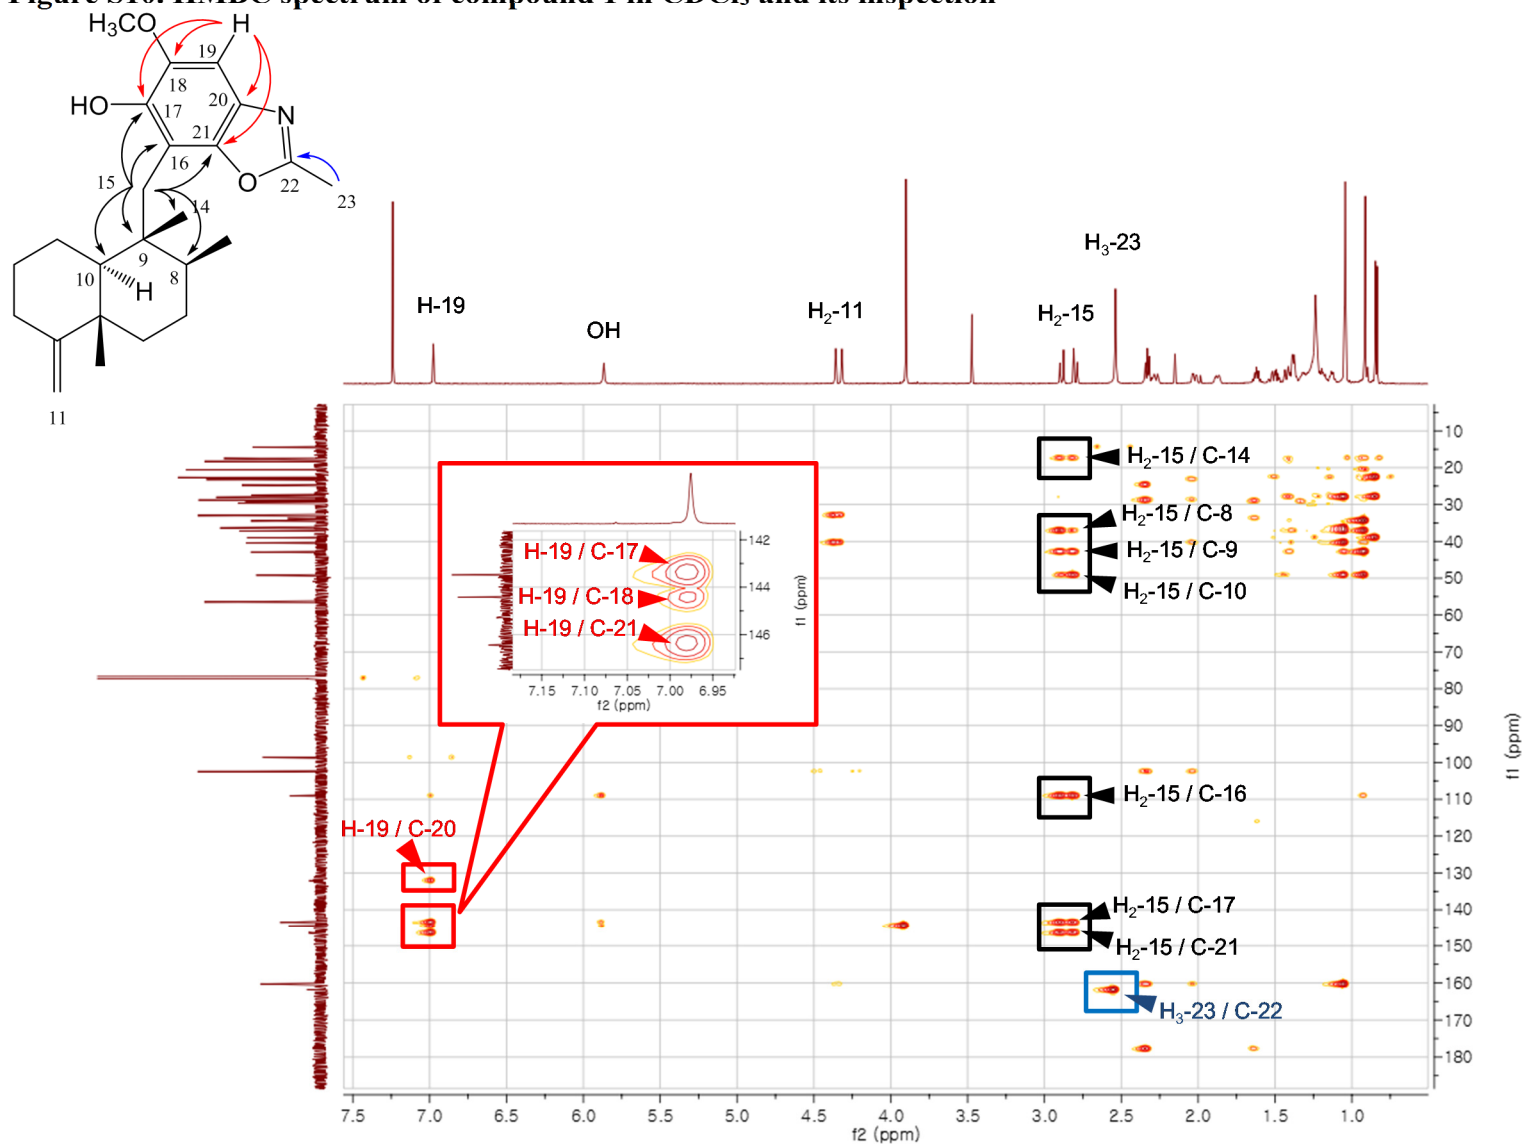

Figure S11. COSY spectrum of compound 1 in CDCl<sub>3</sub>

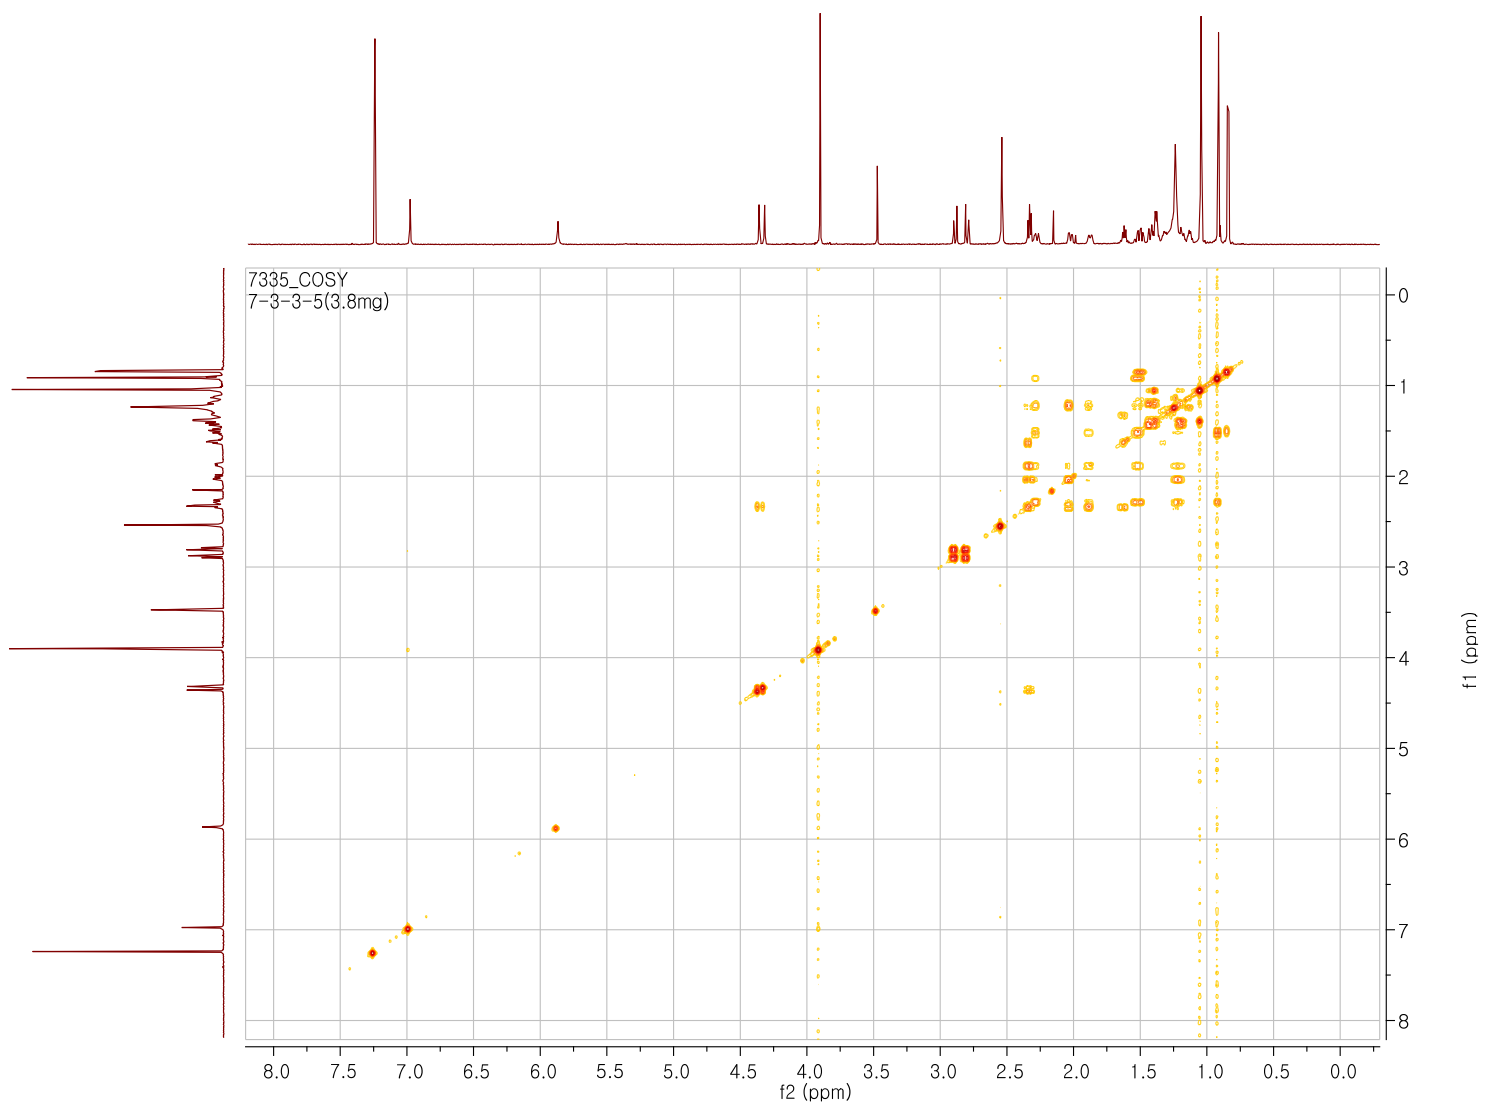

Figure S12. HRFABMS analysis of compound 1

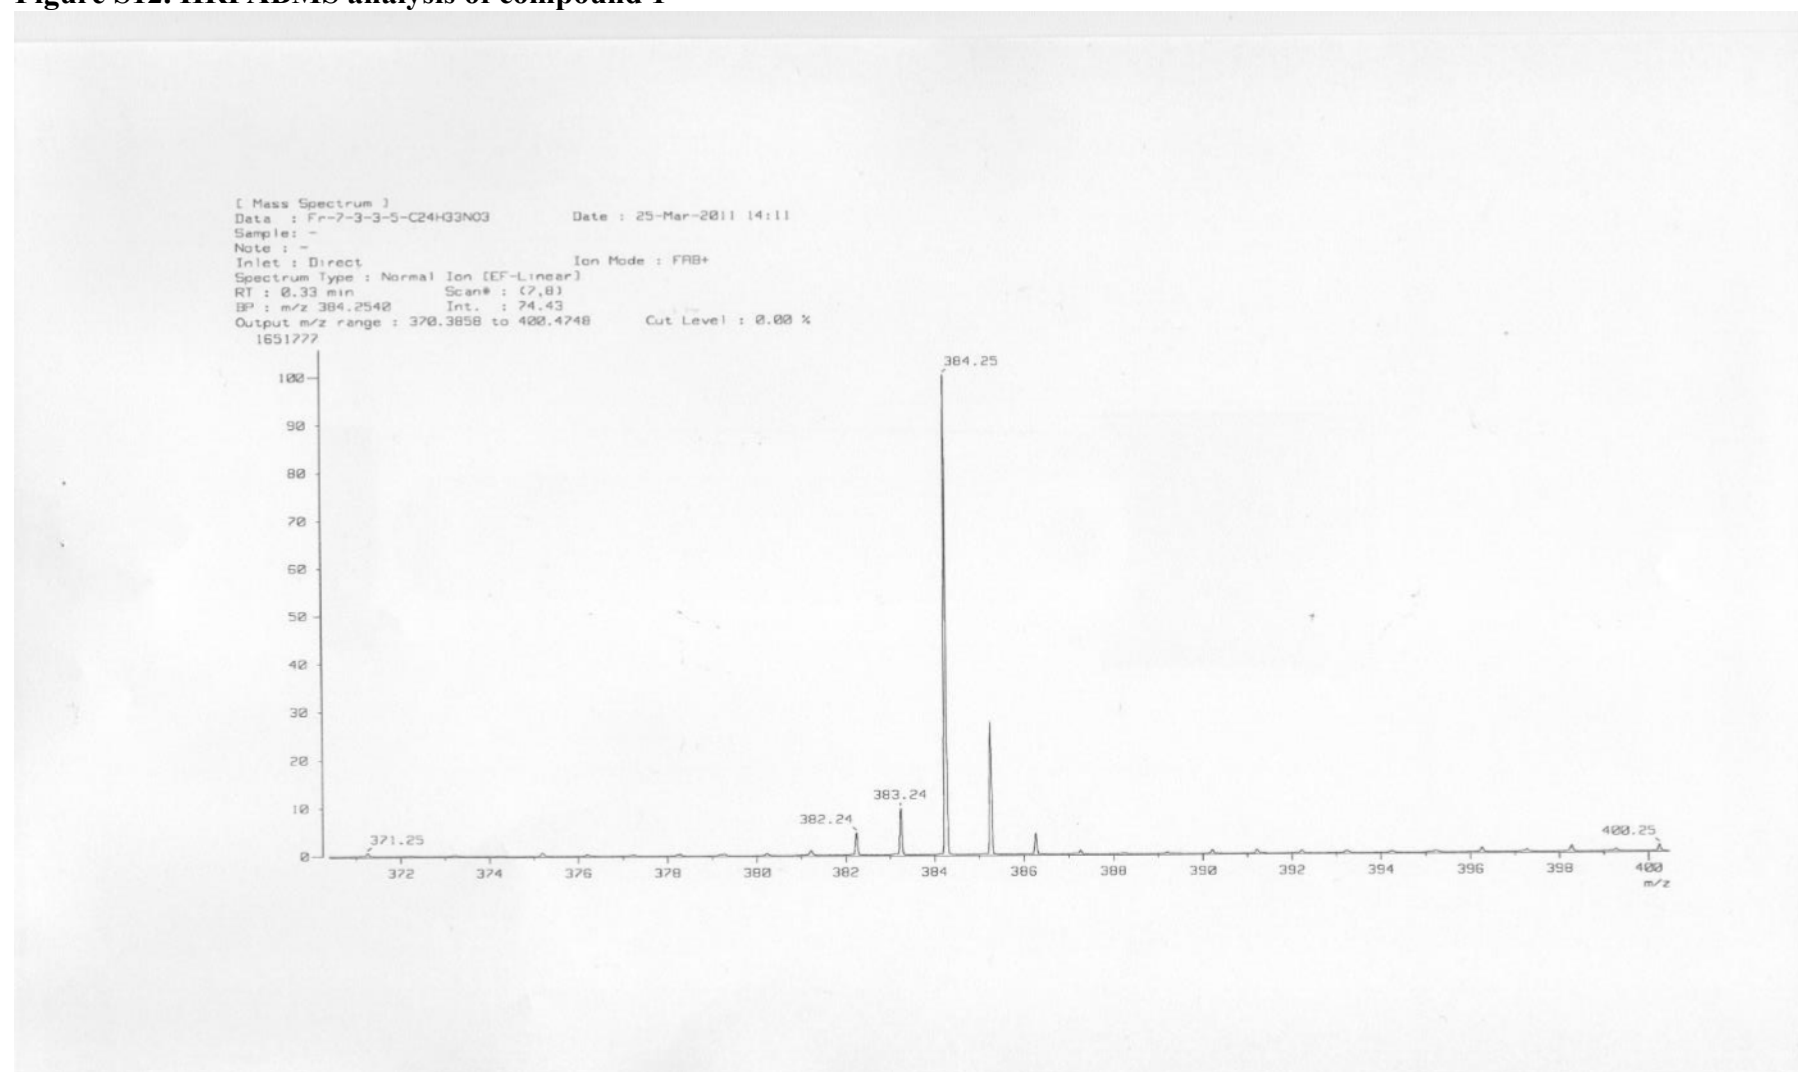



[ Elemental Composition ]

Data : Fr-7-3-3-5-C24H33NO3      Date : 25-Mar-2011 14:11  
Sample: -  
Note : -  
Inlet : Direct      Ion Mode : FAB+  
RT : 0.33 min      Scan#: (7,8)  
Elements : C 24/0, H 34/1, O 3/1, N 1/1  
Mass Tolerance : 1000ppm, 1mmu if m/z < 1, 3mmu if m/z > 3  
Unsaturation (U.S.) : -0.5 - 100.0

| Observed m/z | Int%  | Err[ppm / mmu] | U.S. | Composition     |
|--------------|-------|----------------|------|-----------------|
| 384.2540     | 100.0 | +0.4 / +0.2    | 8.5  | C 24 H 34 O 3 N |
| 385.2570     | 27.5  |                |      |                 |
| 405.2285     | 15.7  |                |      |                 |
| 406.2357     | 26.2  |                |      |                 |

Figure S13.  $^1\text{H}$  NMR spectrum of compound 2 in  $\text{CDCl}_3$  (600 MHz)

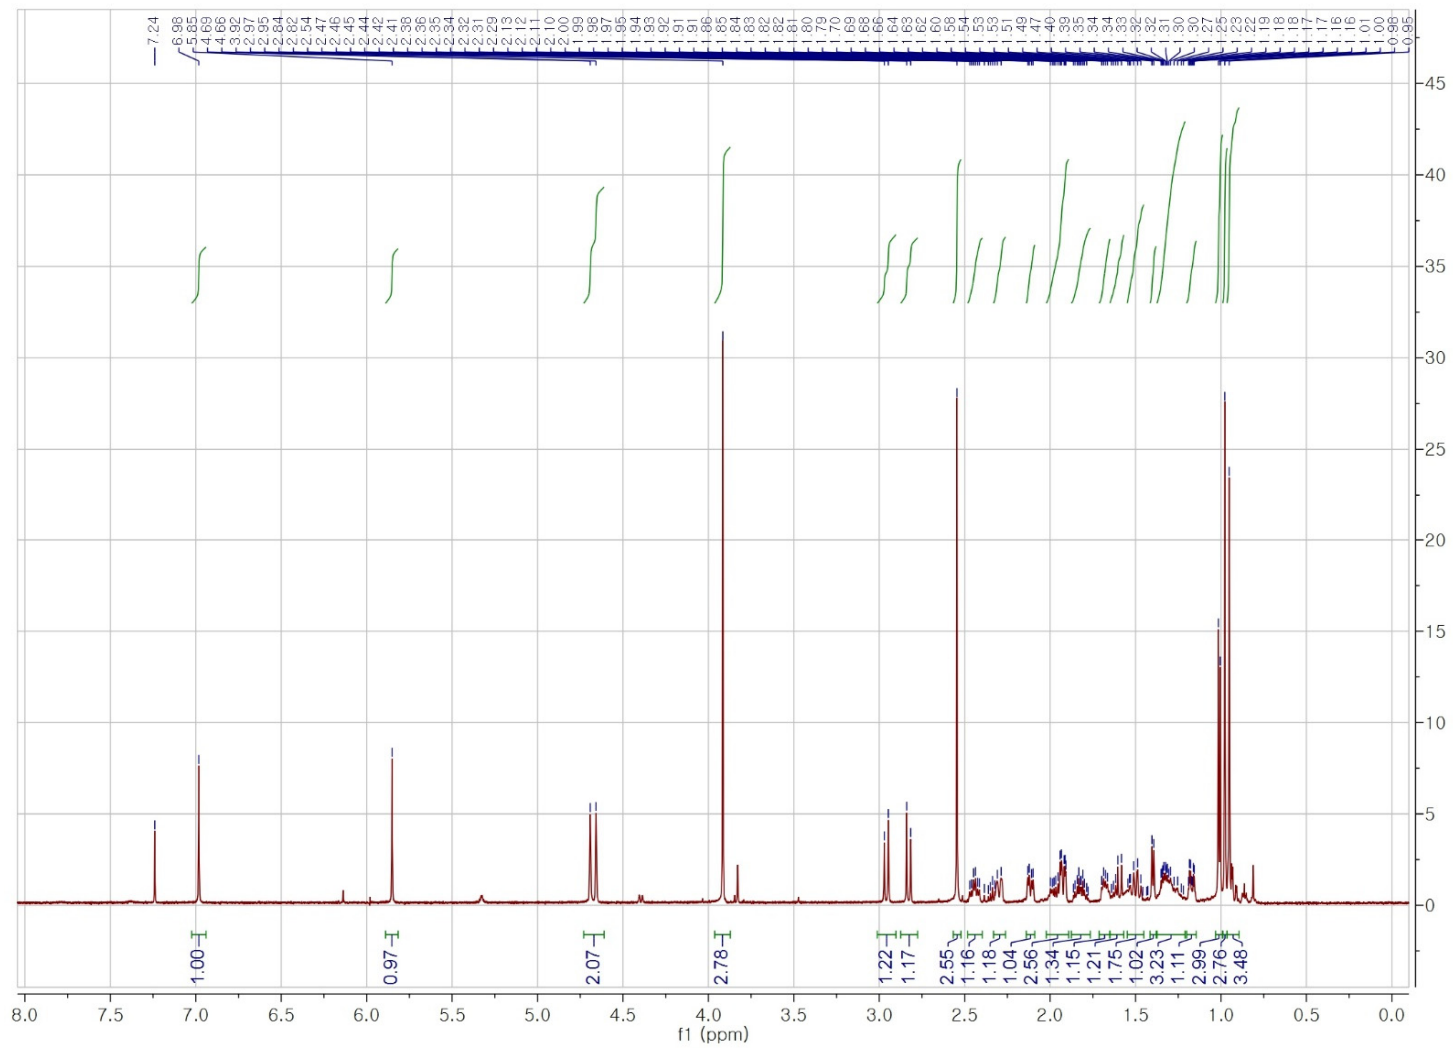

Figure S14.  $^{13}\text{C}$  NMR spectrum of compound 2 in  $\text{CDCl}_3$  (150 MHz)

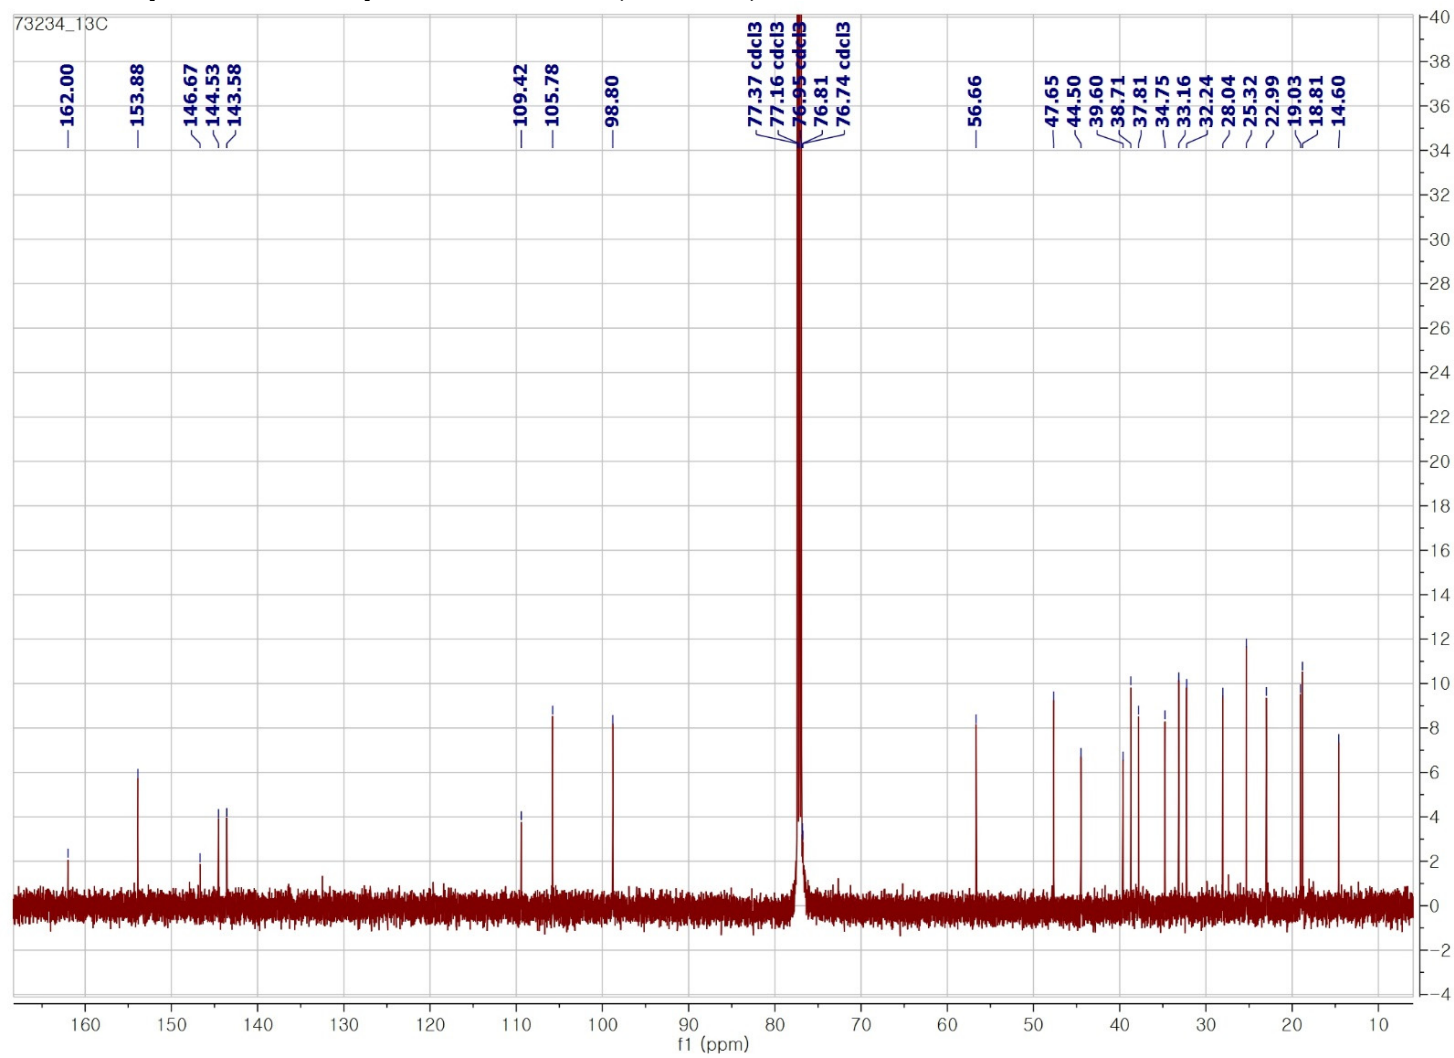

Figure S15. HSQC spectrum of compound 2 in CDCl<sub>3</sub>

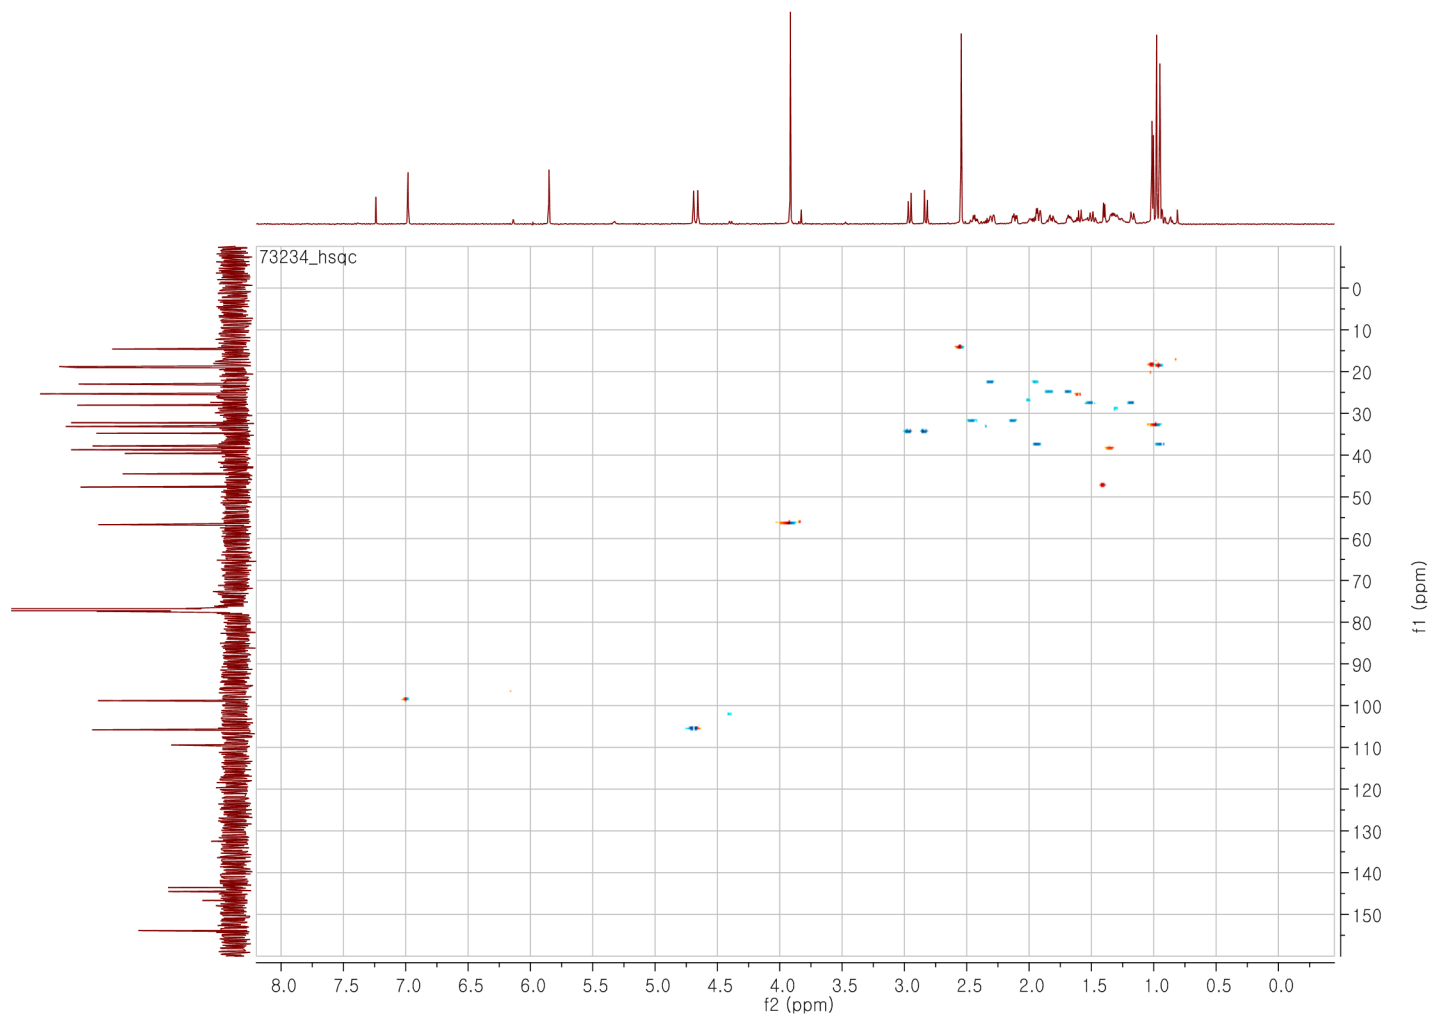

Figure S16. HMBC spectrum of compound 2 in CDCl<sub>3</sub> and its interpretation

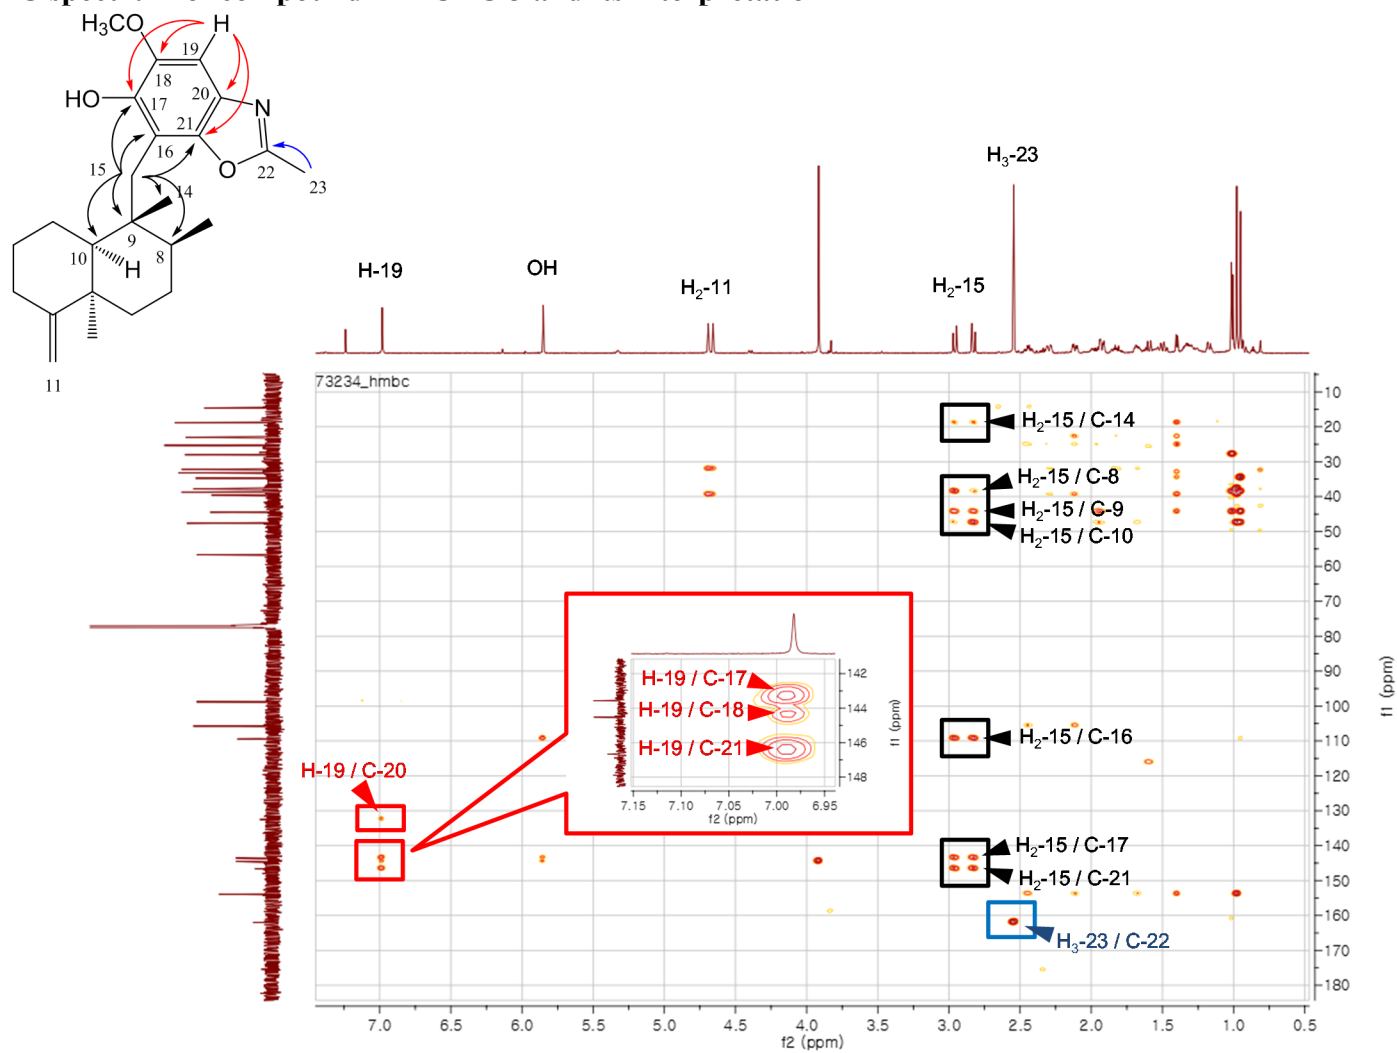

Figure S17. COSY spectrum of compound 2 in CDCl<sub>3</sub>

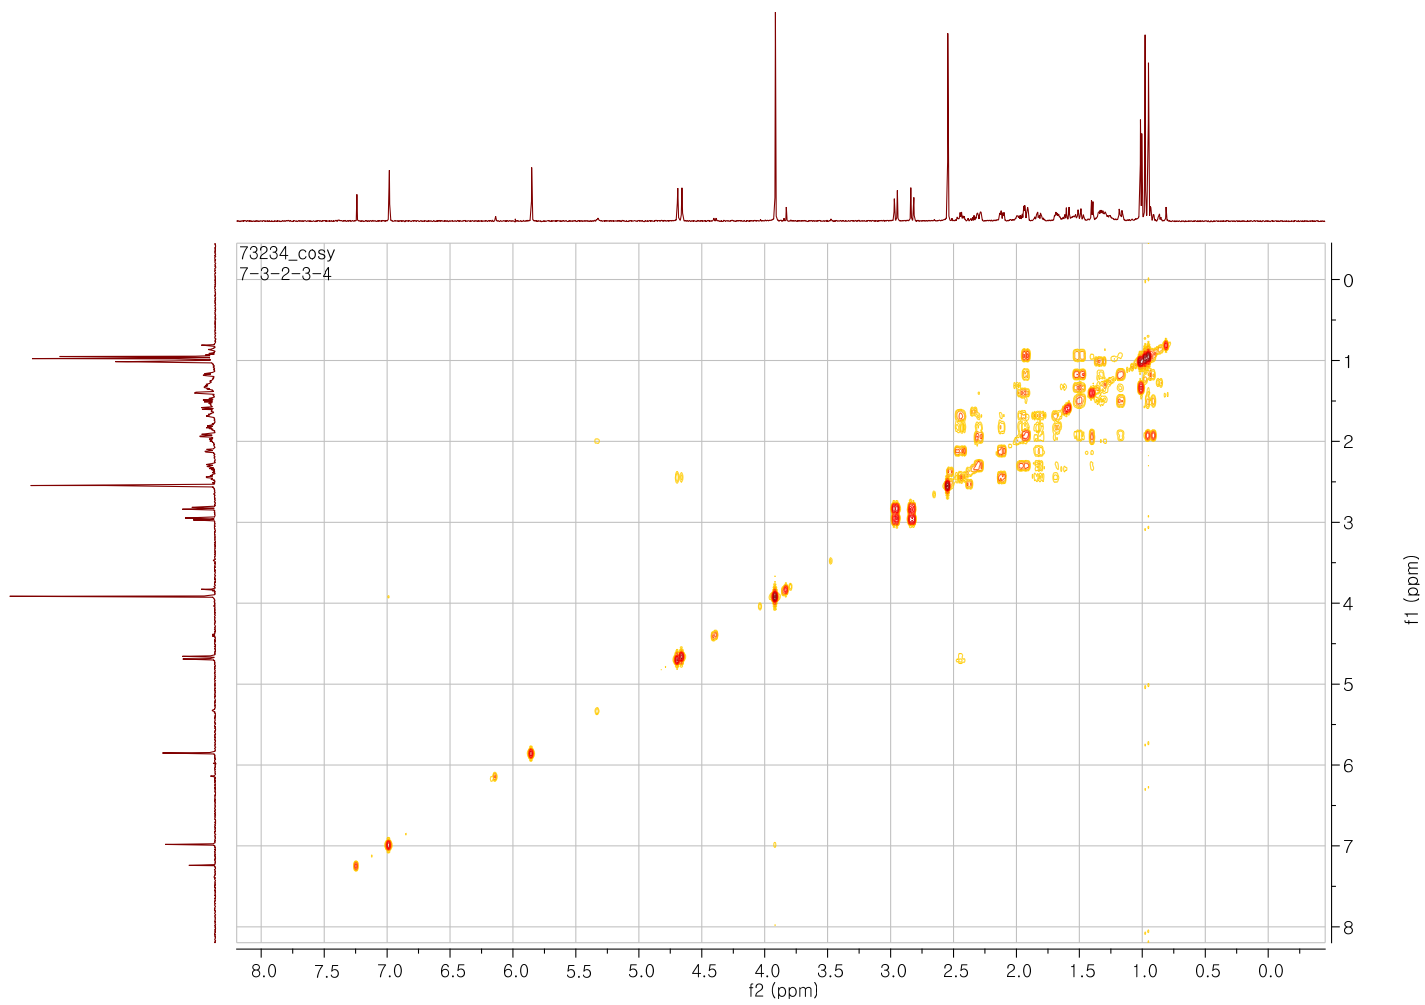

Figure S18. HRFABMS analysis of compound 2

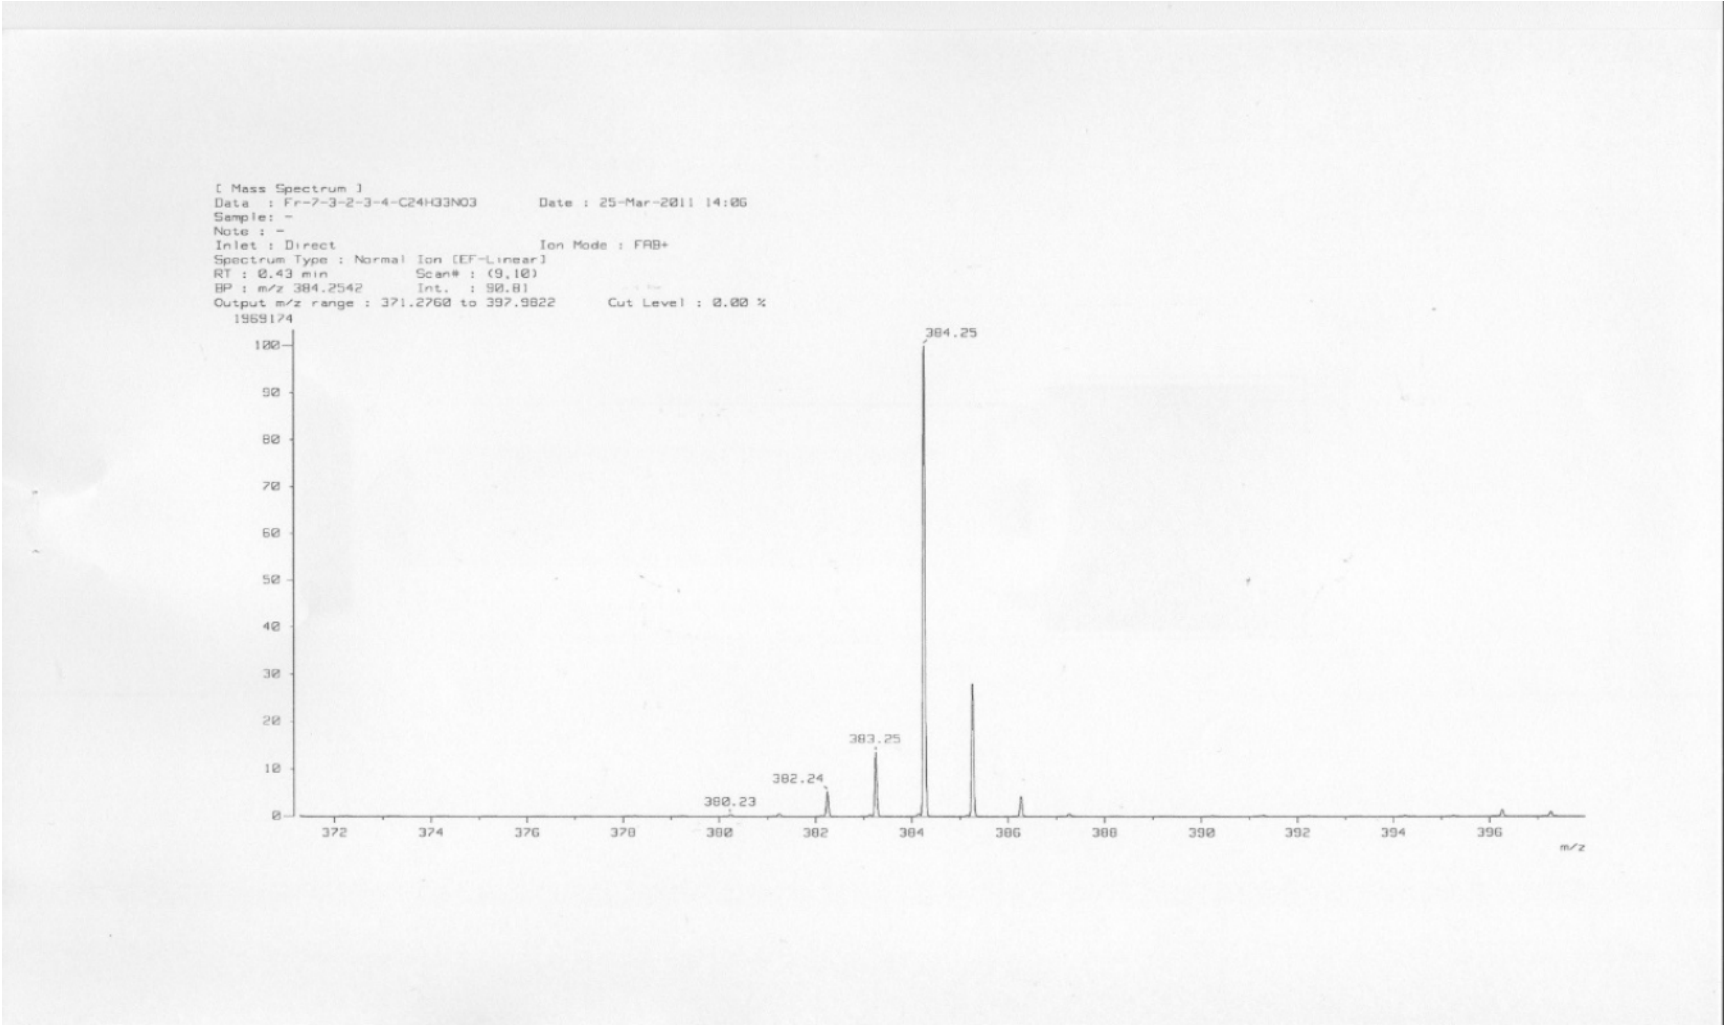

[ Elemental Composition ]

Page: 1

Data : Fr-7-3-2-3-4-C24H33NO3      Date : 25-Mar-2011 14:06  
Sample: -  
Note : -  
Inlet : Direct                              Ion Mode : FAB+  
RT : 0.43 min                                Scan# : (9,10)  
Elements : C 24/0, H 34/1, O 3/1, N 1/1  
Mass Tolerance : 1000ppm, 1mmu if m/z < 1, 3mmu if m/z > 3  
Unsaturation (U.S.) : -0.5 - 100.0

| Observed m/z | Int%  | Err [ppm / mmu] | U.S. | Composition     |
|--------------|-------|-----------------|------|-----------------|
| 383.2462     | 13.6  | +0.4 / +0.1     | 9.0  | C 24 H 33 O 3 N |
| 384.2542     | 100.0 | +0.7 / +0.3     | 8.5  | C 24 H 34 O 3 N |
| 385.2605     | 28.0  |                 |      |                 |
| 398.2696     | 10.4  |                 |      |                 |



Figure S19. <sup>1</sup>H NMR spectrum of a mixture of compounds 3 and 4 in CDCl<sub>3</sub> (600 MHz)

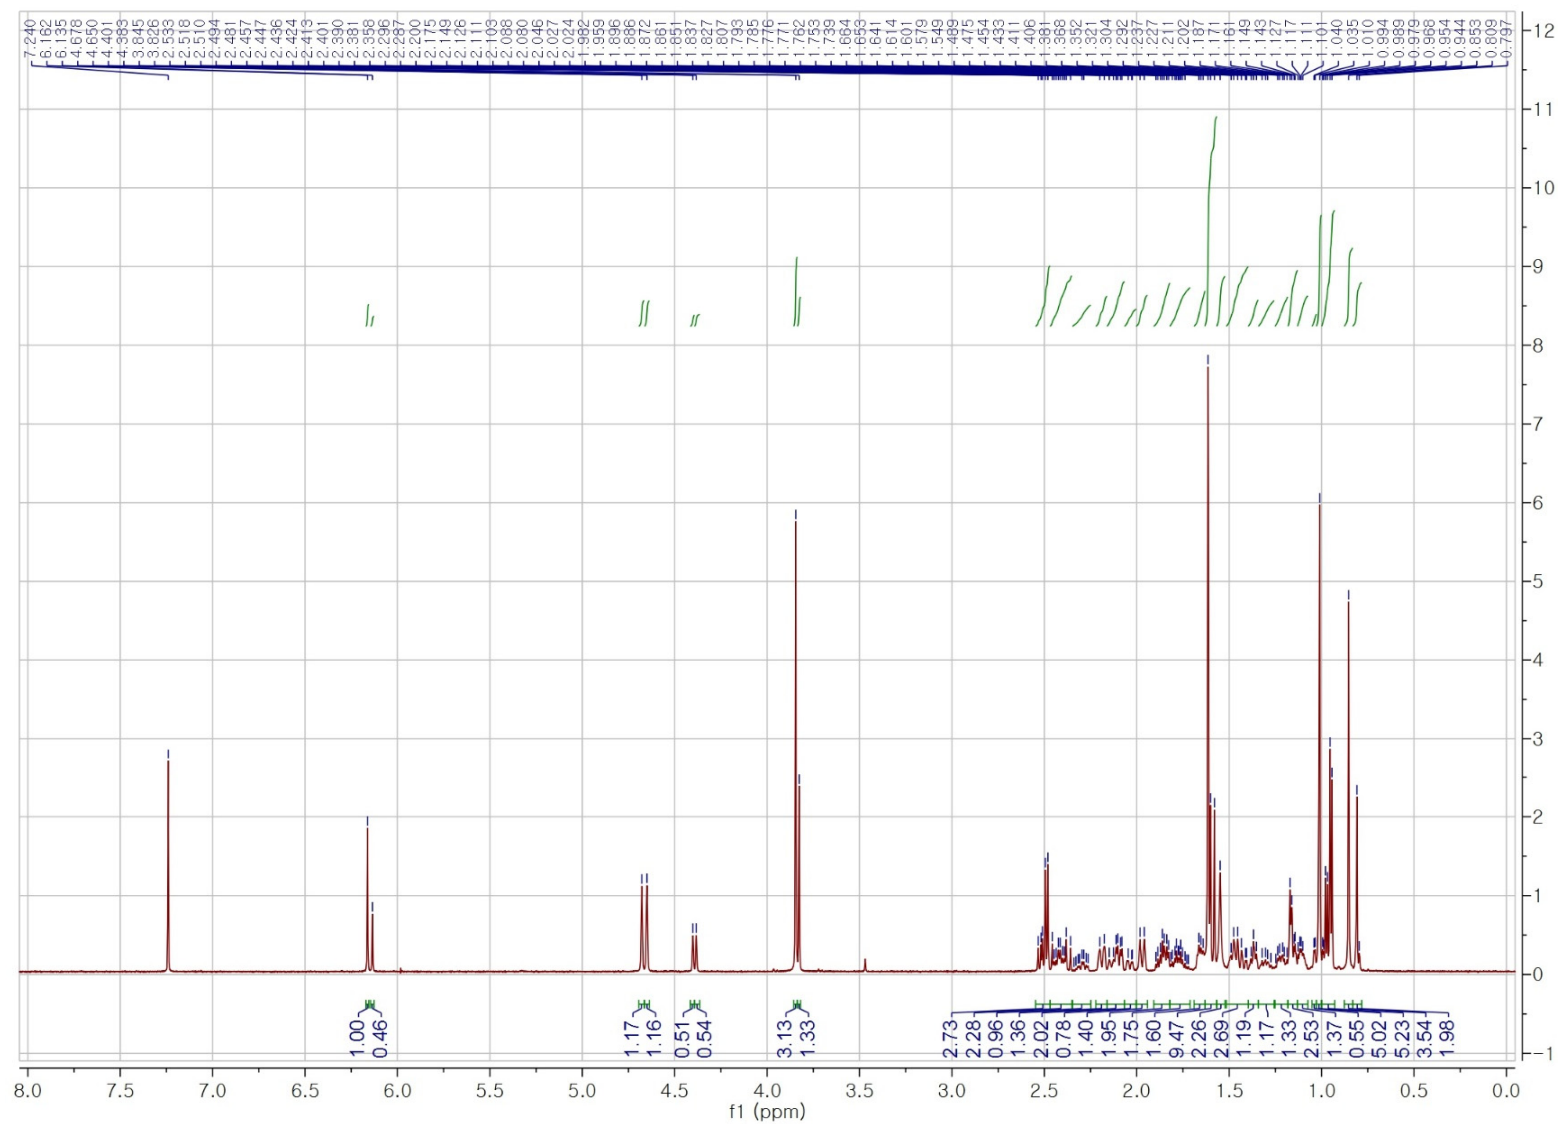

Figure S20.  $^{13}\text{C}$  NMR spectrum of a mixture of compounds 3 and 4 in  $\text{CDCl}_3$  (150 MHz)

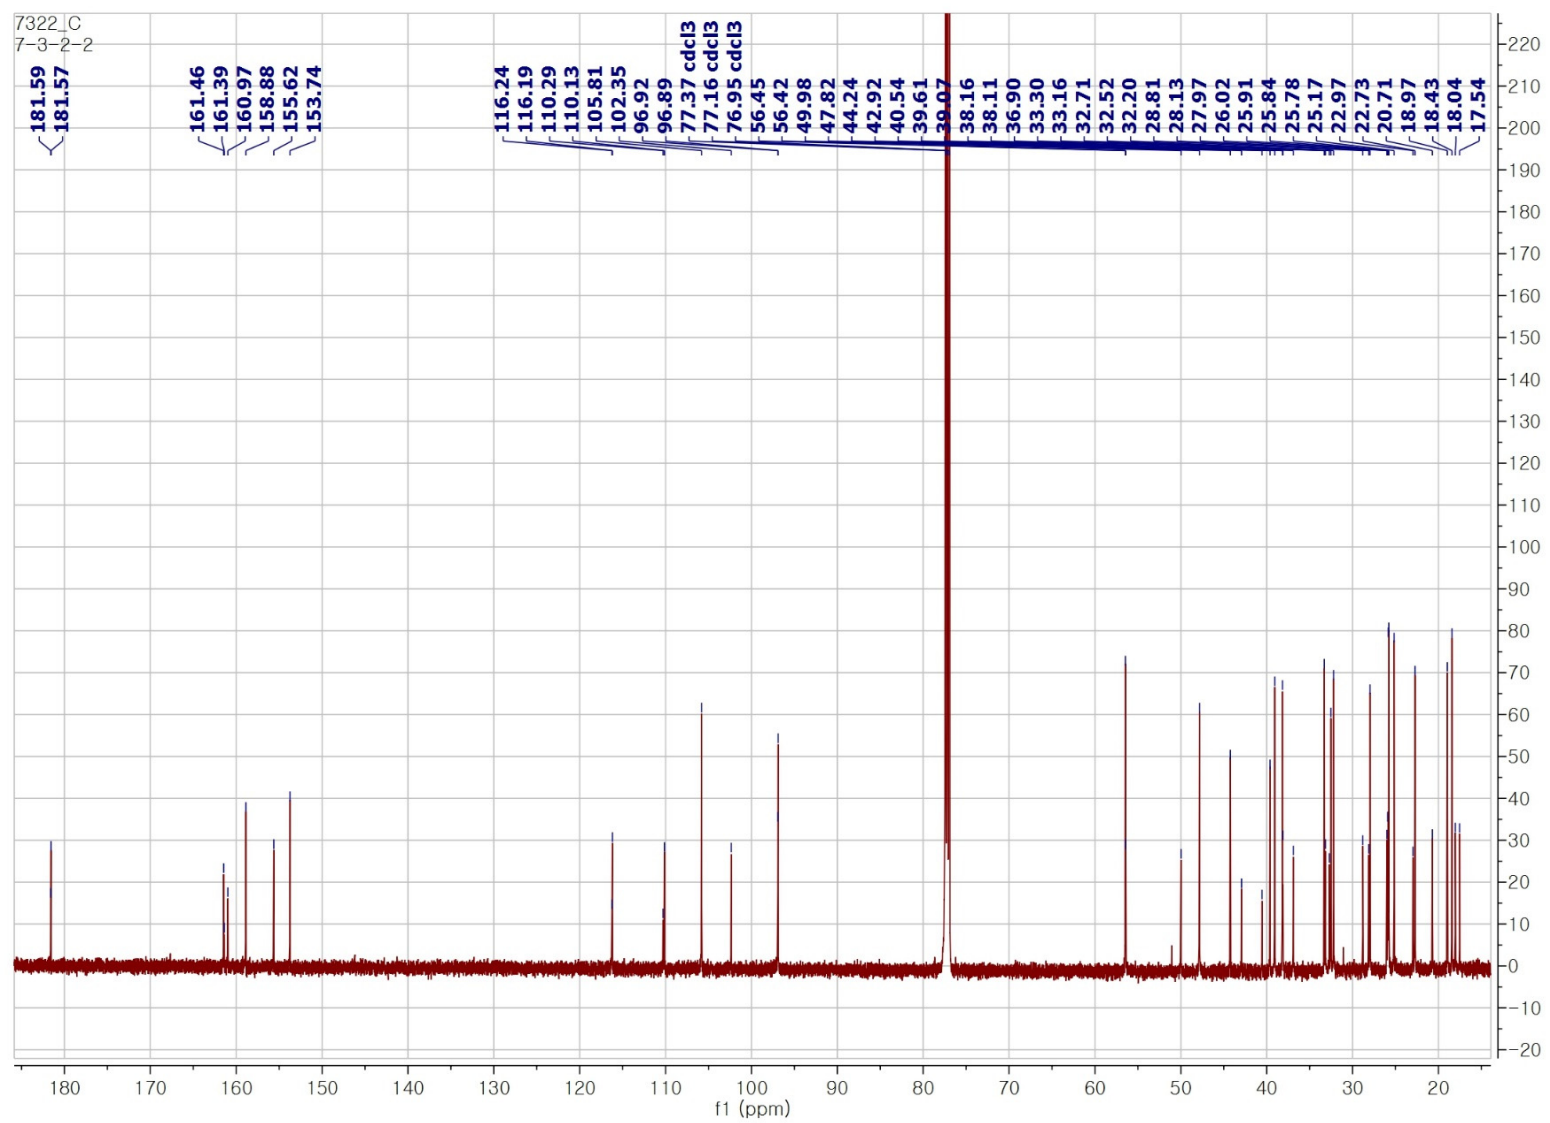

Figure S21. HSQC spectrum of a mixture of compounds 3 and 4 in CDCl<sub>3</sub>

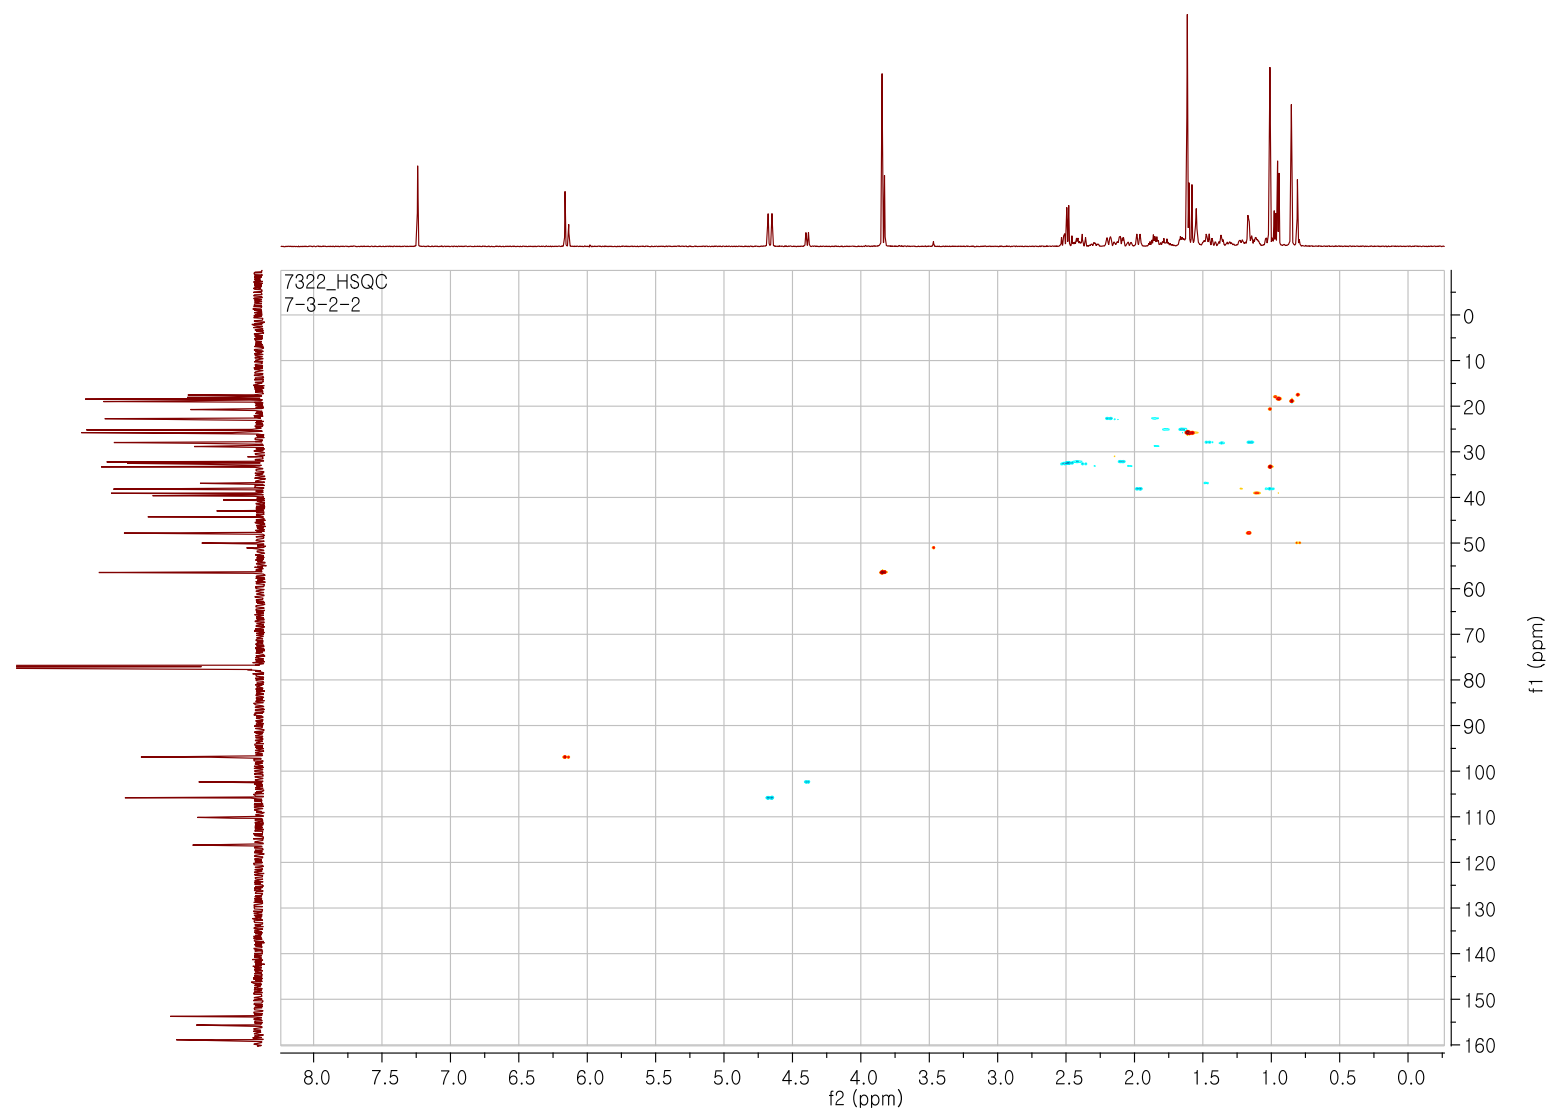

Figure S22. HMBC spectrum of a mixture of compounds 3 and 4 in CDCl<sub>3</sub> and its inspection

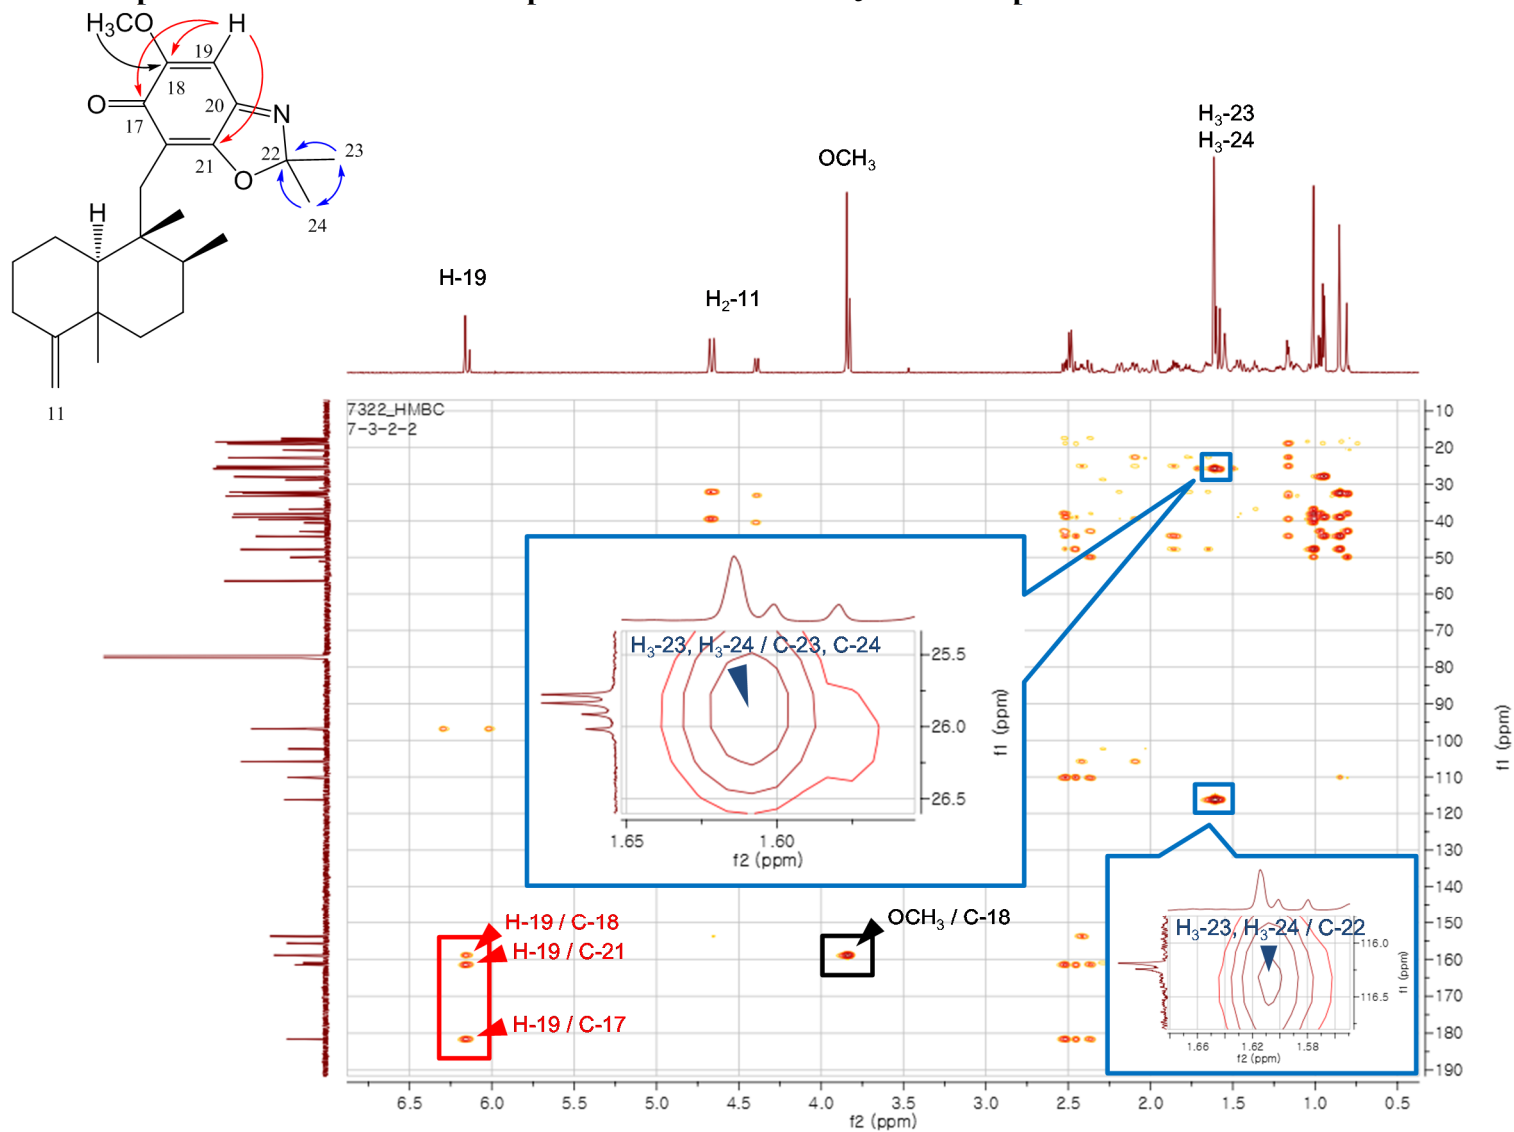



Figure S24. HRFABMS analysis of a mixture of compounds 3 and 4

[ Mass Spectrum ]  
Data : Fr-7-3-2-2-C25H35NO3      Date : 25-Mar-2011 14:02  
Sample : -  
Note : -  
Inlet : Direct      Ion Mode : FAB+  
Spectrum Type : Normal Ion [EF-Linear]  
RT : 0.23 min      Scan# : (5,6)  
BP : m/z 398.2696      Int. : 90.01  
Output m/z range : 383.9911 to 412.2997      Cut Level : 0.00 %  
1988472

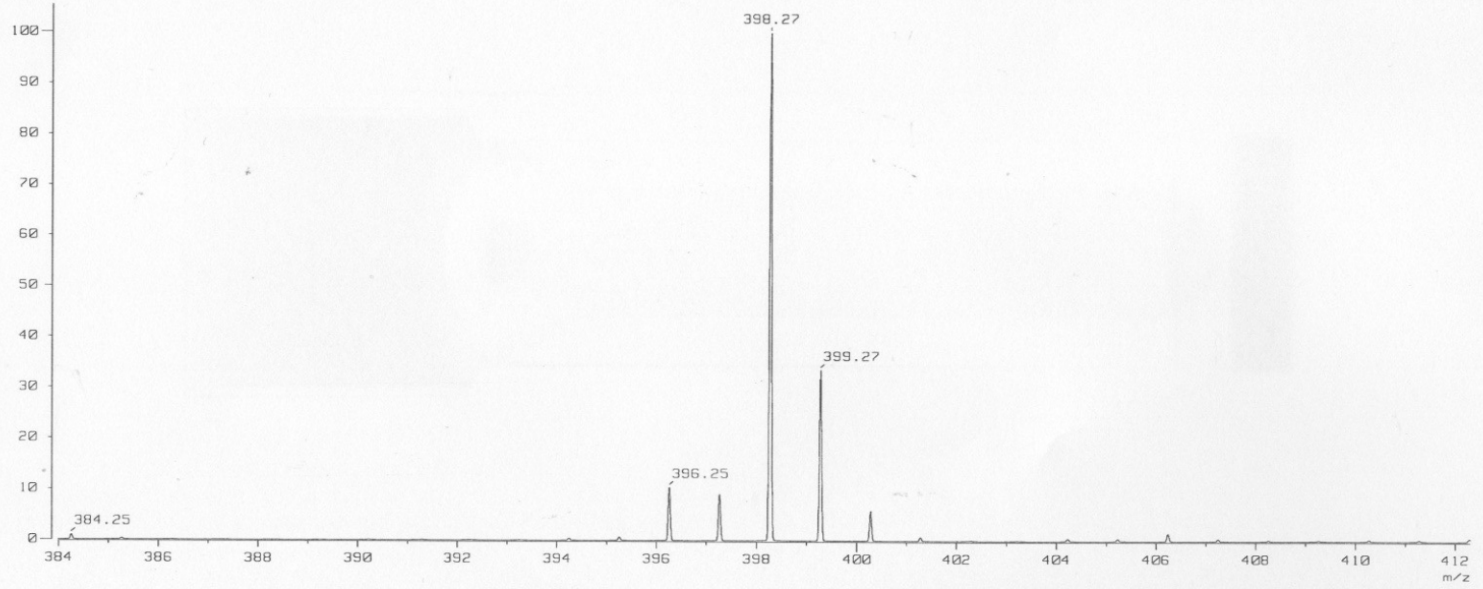

[ Elemental Composition ]

Page: 1

Data : Fr-7-3-2-3-4-C24H33NO3      Date : 25-Mar-2011 14:06  
Sample: -  
Note : -  
Inlet : Direct                      Ion Mode : FAB+  
RT : 0.43 min                      Scan#: (9,10)  
Elements : C 24/0, H 34/1, O 3/1, N 1/1  
Mass Tolerance : 1000ppm, 1mmu if m/z < 1, 3mmu if m/z > 3  
Unsaturation (U.S.) : -0.5 - 100.0

| Observed m/z | Int%  | Err [ppm / mmu] | U.S. | Composition     |
|--------------|-------|-----------------|------|-----------------|
| 383.2462     | 13.6  | +0.4 / +0.1     | 9.0  | C 24 H 33 O 3 N |
| 384.2542     | 100.0 | +0.7 / +0.3     | 8.5  | C 24 H 34 O 3 N |
| 385.2605     | 28.0  |                 |      |                 |
| 398.2696     | 10.4  |                 |      |                 |

Figure S25. <sup>1</sup>H NMR spectrum of compound 5 in CDCl<sub>3</sub> (600 MHz)

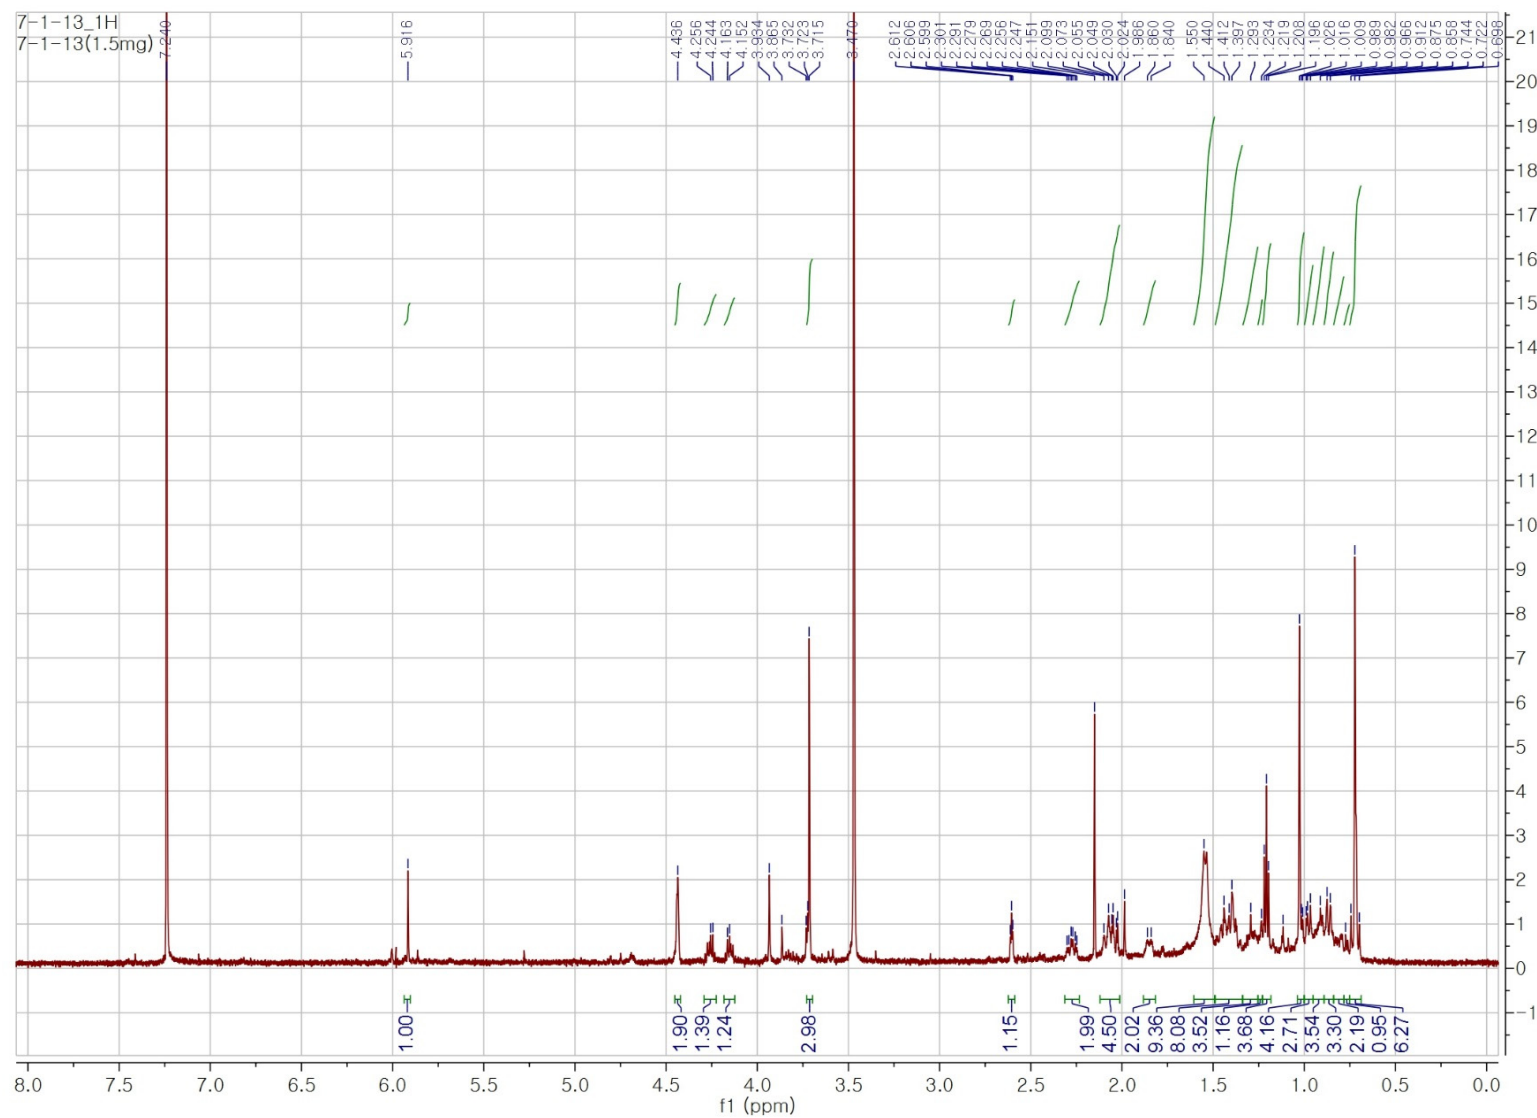



Figure S26.  $^{13}\text{C}$  NMR spectrum of compound 5 in  $\text{CDCl}_3$  (150 MHz)

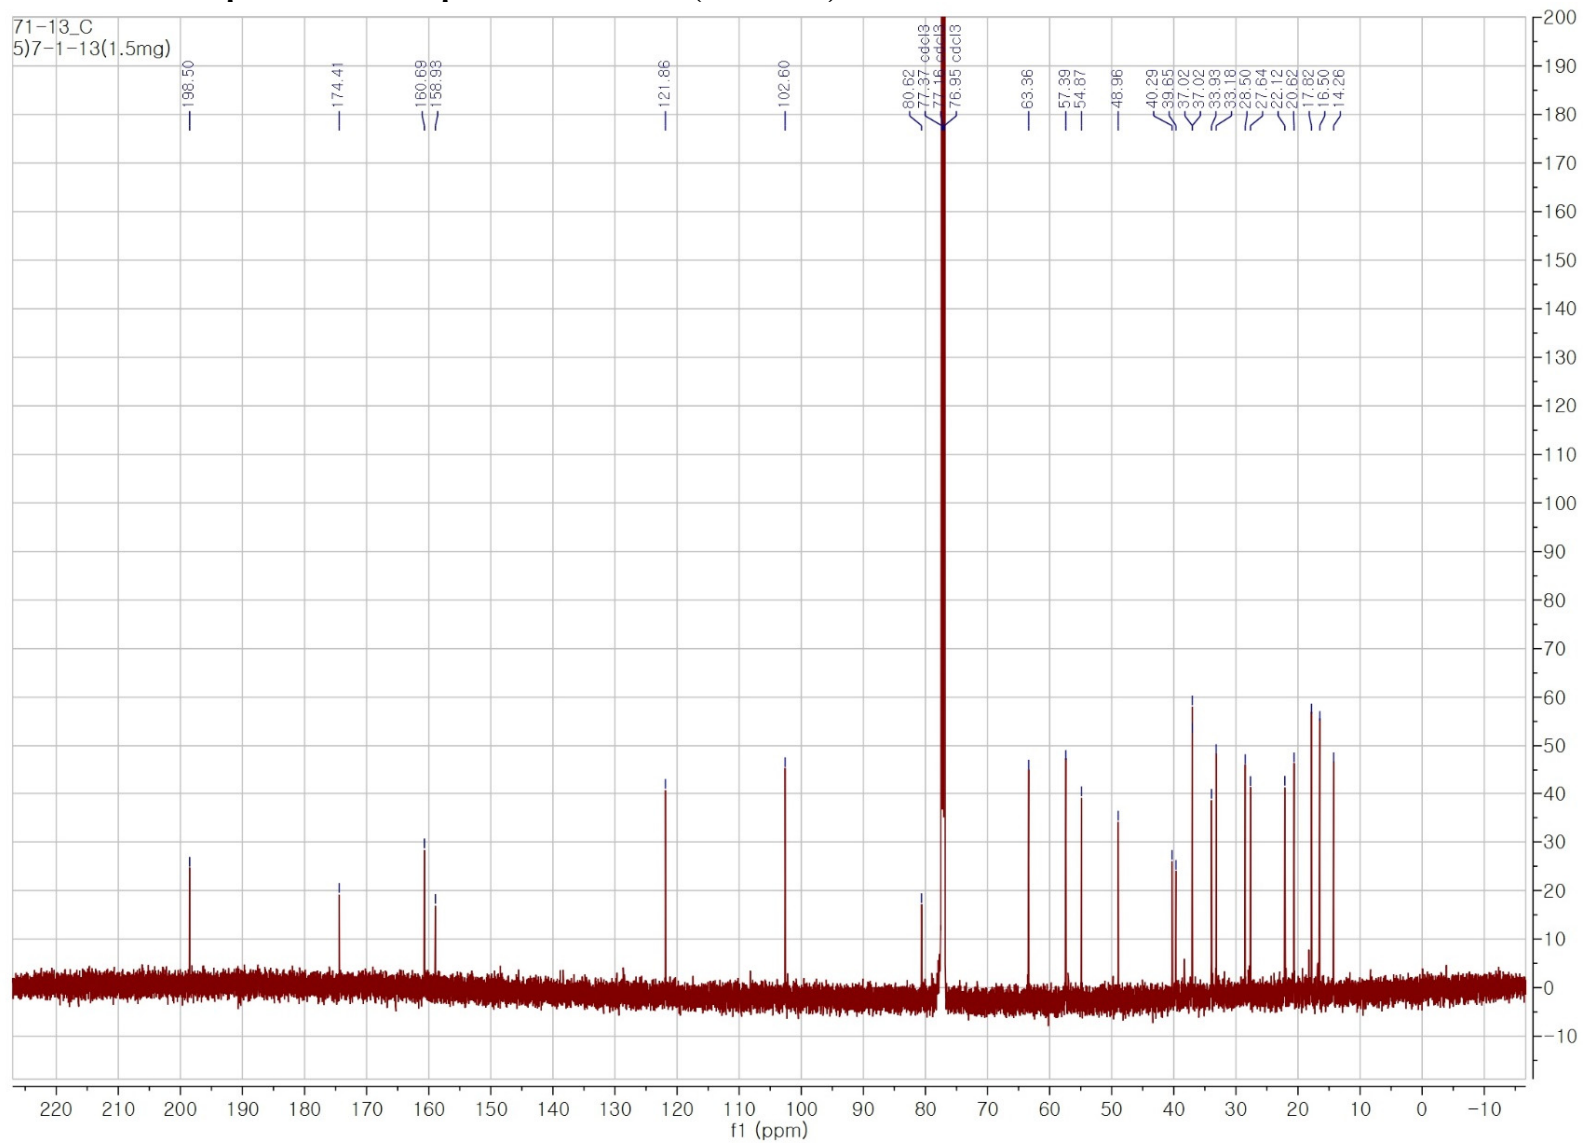

Figure S27. HSQC spectrum of compound 5 in CDCl<sub>3</sub>

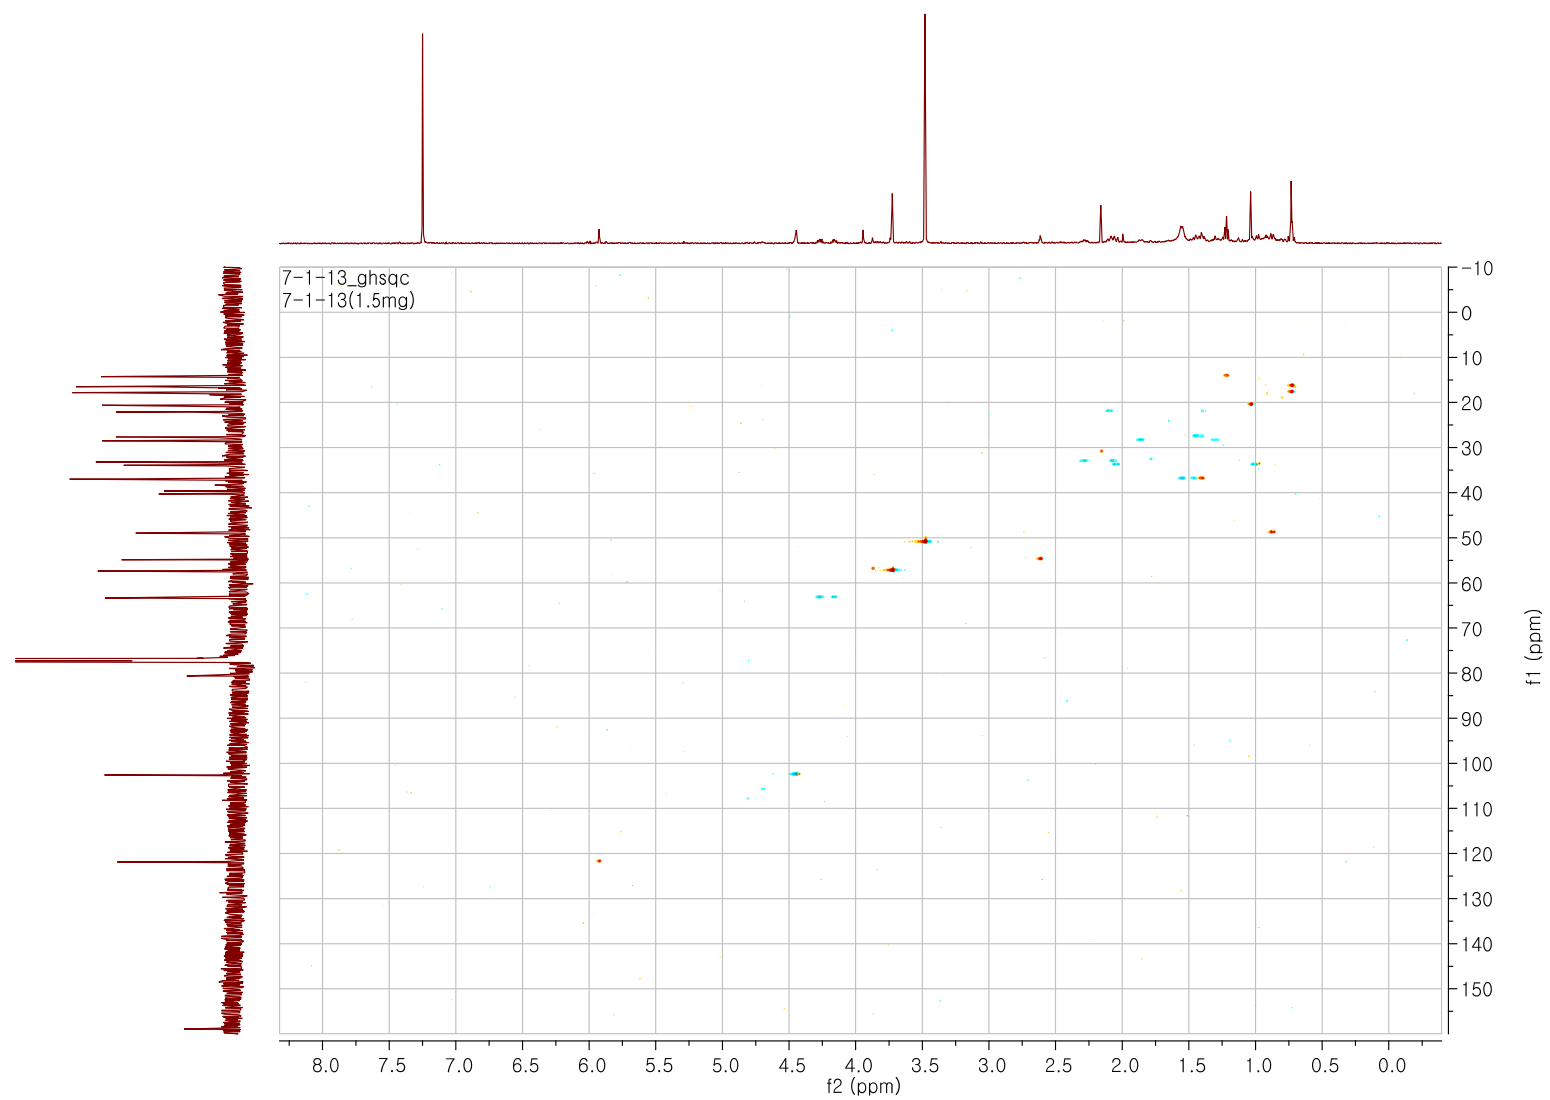

Figure S28. HMBC spectrum of compound 5 in CDCl<sub>3</sub>

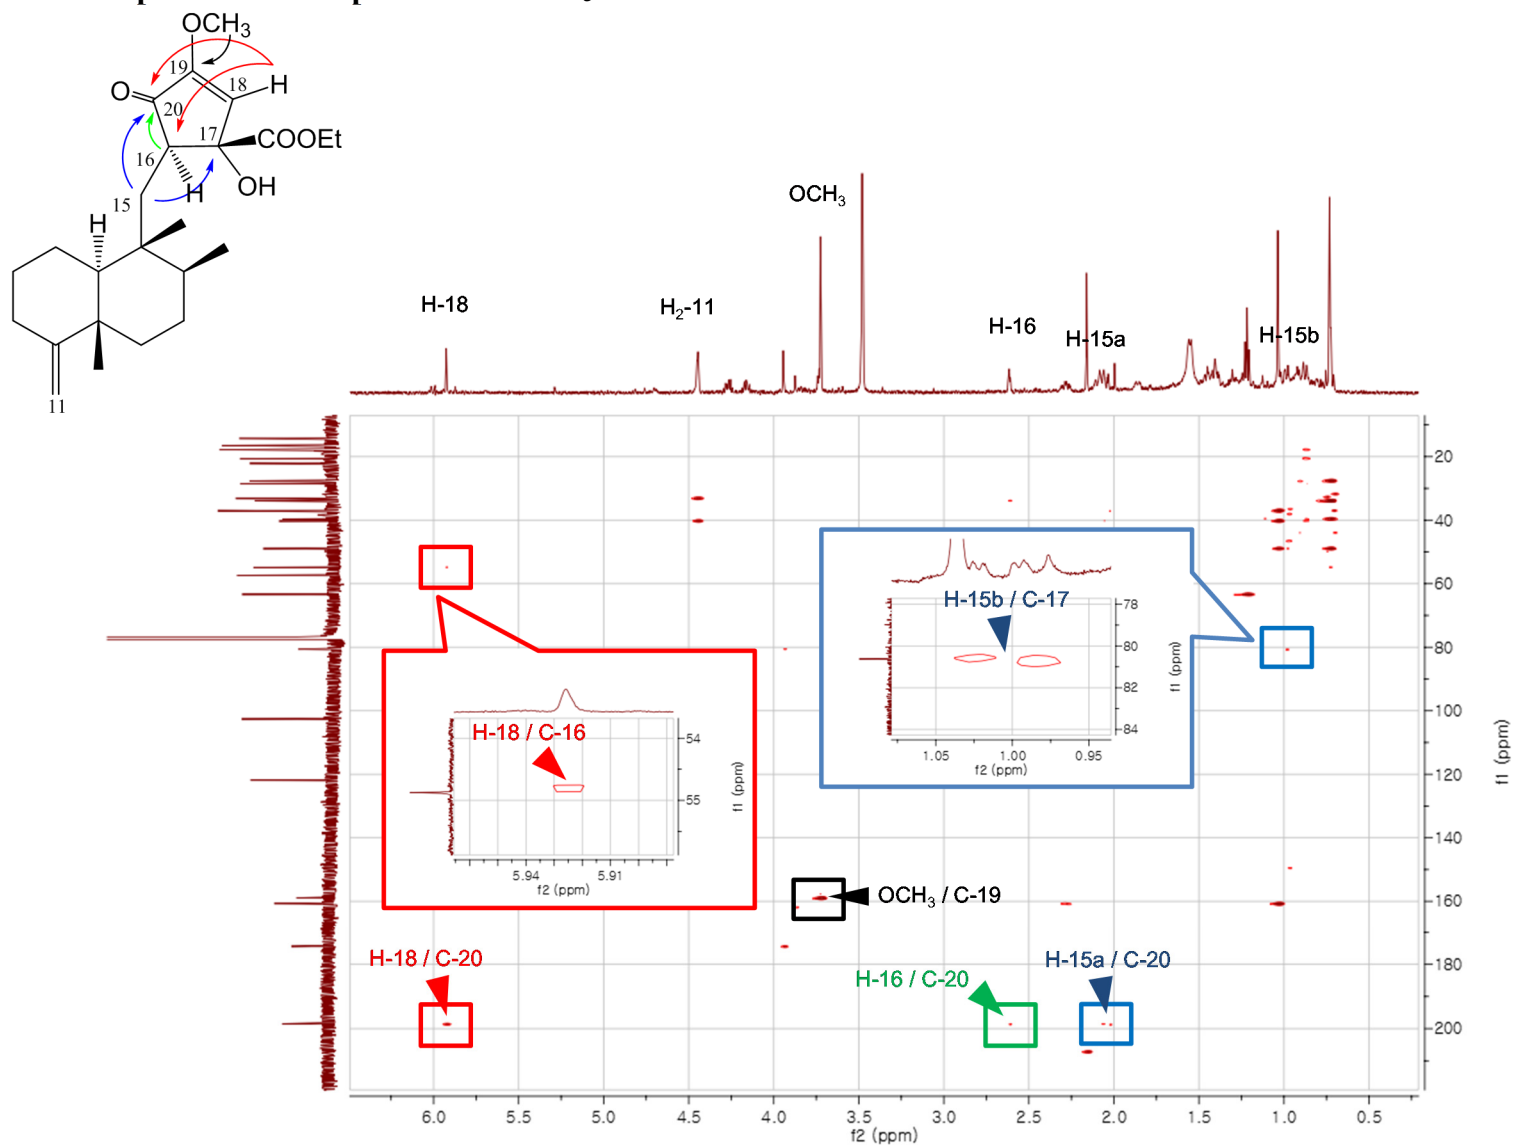

Figure S29. COSY spectrum of compound 5 in CDCl<sub>3</sub>

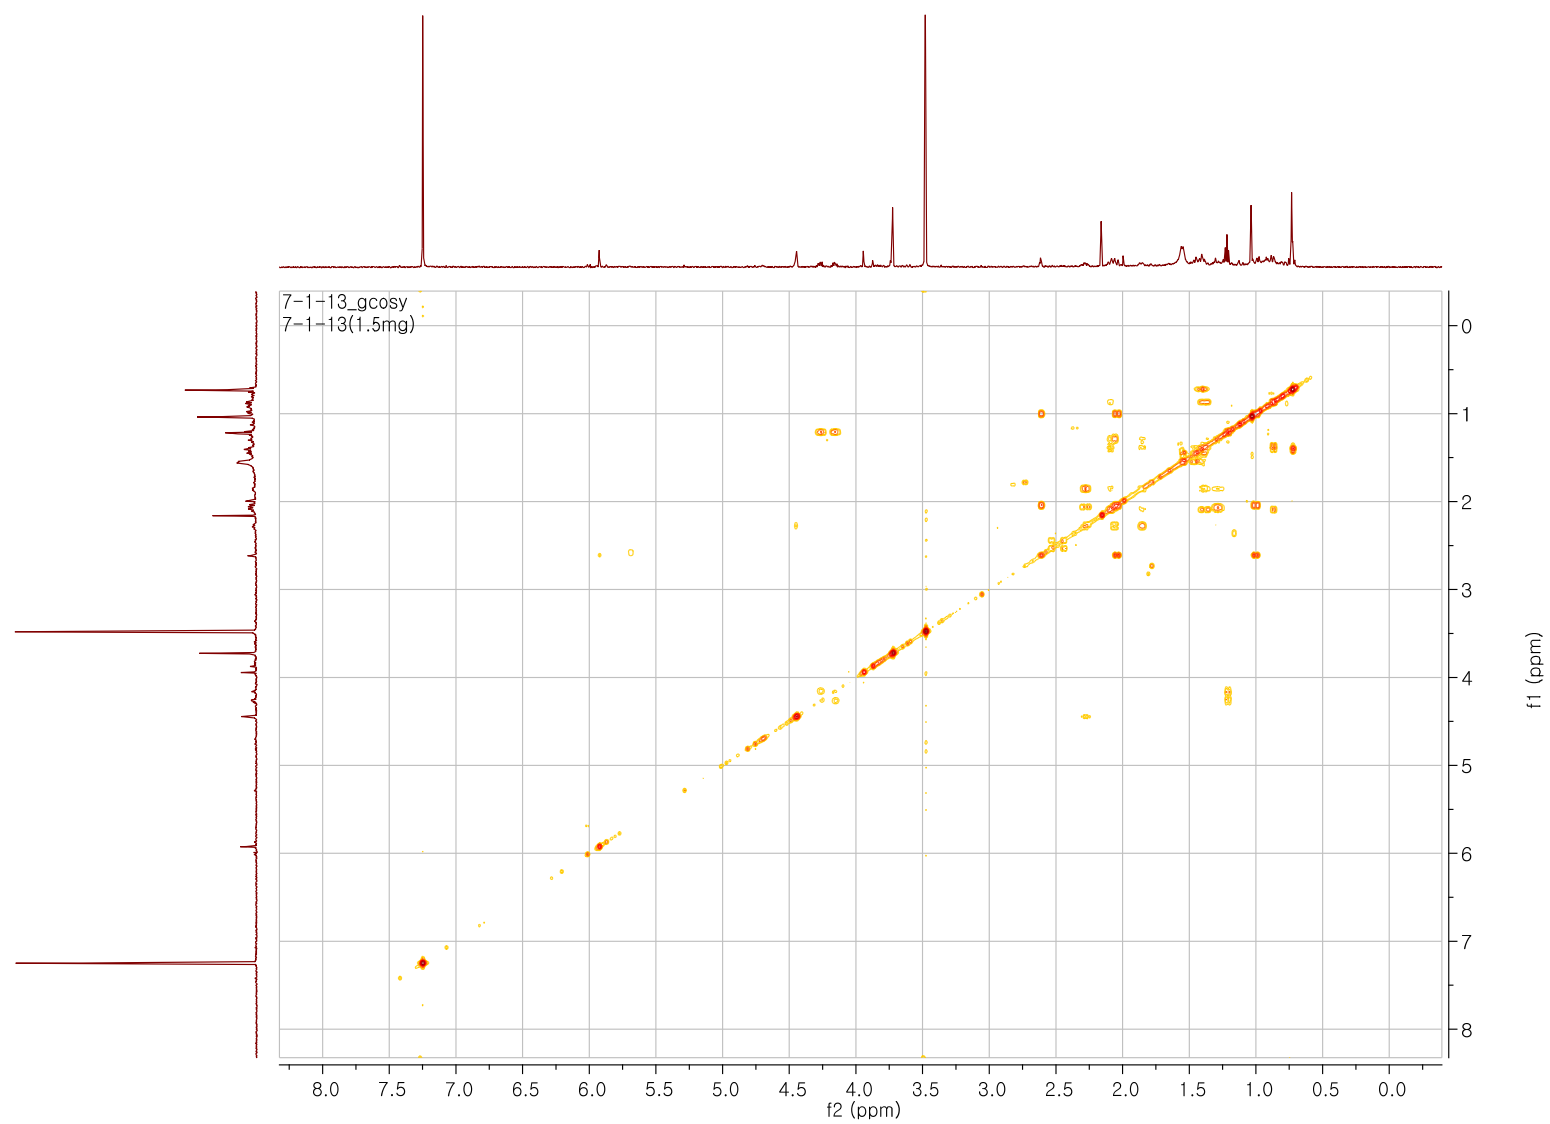

Figure S30. NOESY spectrum of compound 5 in CDCl<sub>3</sub>

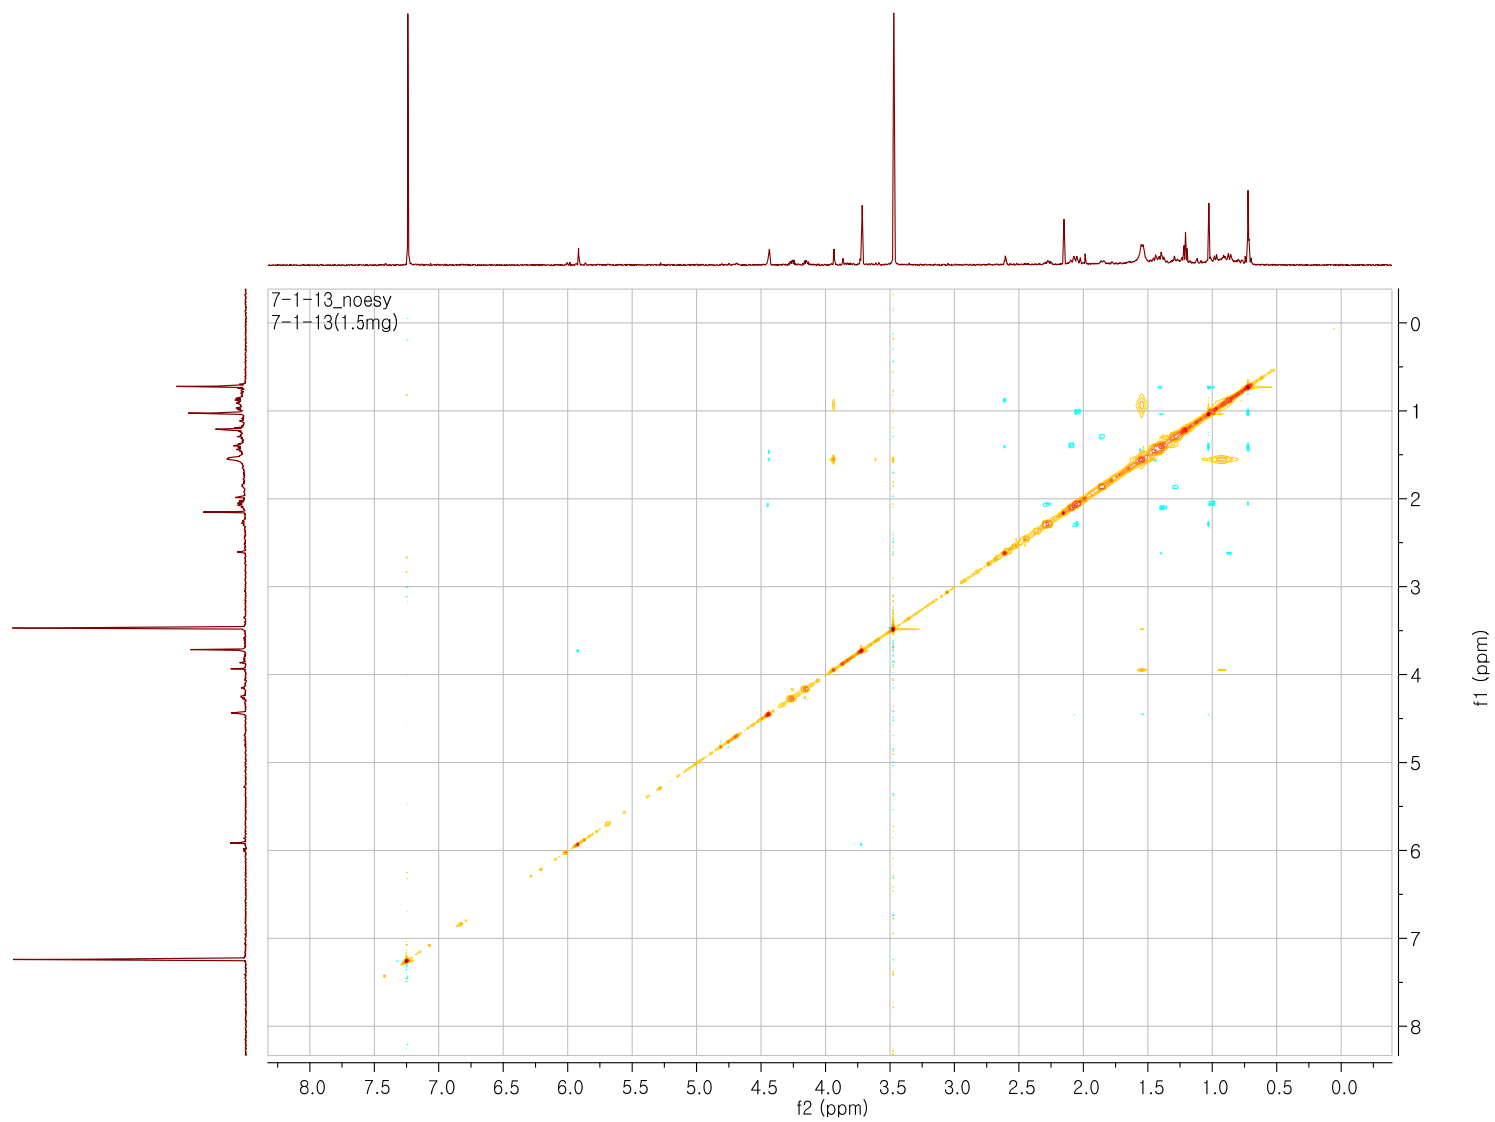

Figure S31. HRFABMS analysis of compound 5

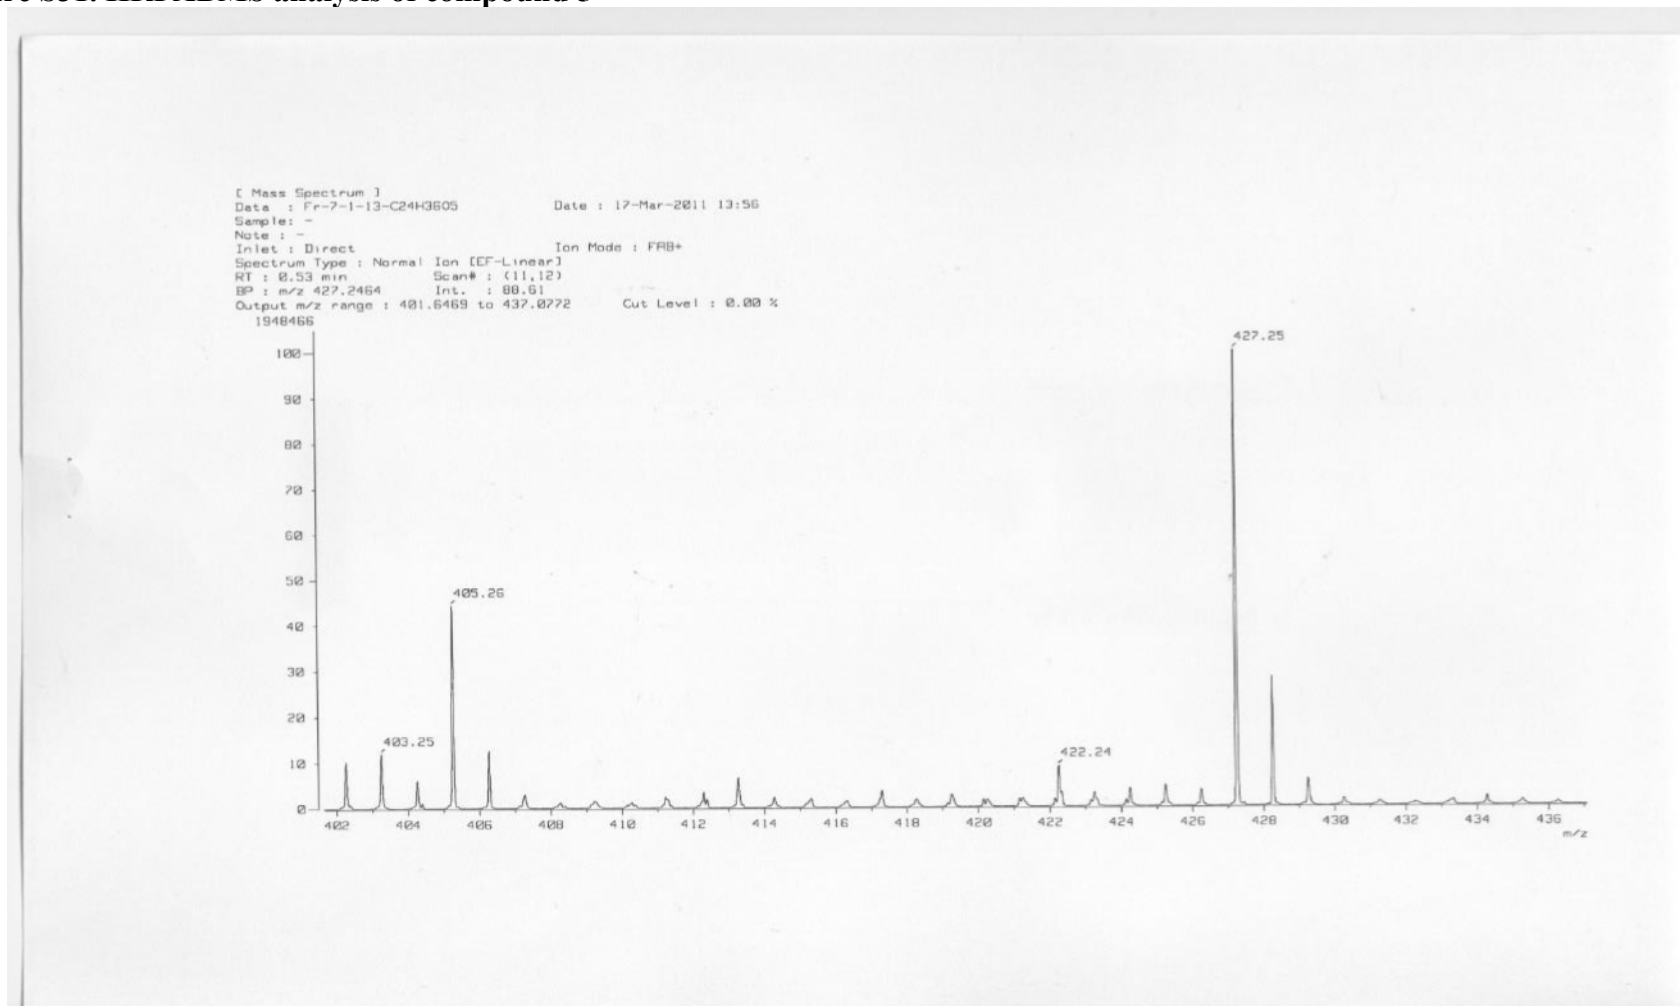

[ Elemental Composition ]

Data : Fr-7-1-13-C24H36O5

Date : 17-Mar-2011 13:56

Page: 1

Sample: -

Note: -

Inlet : Direct

Ion Mode : FAB+

RT : 0.53 min

Scan#: (11,12)

Elements : C 24/0, H 36/1, O 5/1, Na 1/1

Mass Tolerance : 1000ppm, 1mmu if m/z < 1, 3mmu if m/z > 3

Unsaturation (U.S.) : -0.5 - 100.0

| Observed m/z | Int%  | Err [ppm / mmu] | U.S. | Composition      |
|--------------|-------|-----------------|------|------------------|
| 355.2250     | 10.0  | +0.3 / +0.1     | 5.5  | C 21 H 32 O 3 Na |
| 357.2041     | 12.1  | -0.1 / +0.0     | 5.5  | C 20 H 30 O 4 Na |
| 369.2438     | 59.4  |                 |      |                  |
| 370.2435     | 16.5  |                 |      |                  |
| 385.2377     | 15.2  | +5.8 / +2.3     | 5.5  | C 22 H 34 O 4 Na |
| 387.2525     | 88.9  | +3.5 / +1.4     | 4.5  | C 22 H 36 O 4 Na |
| 388.2535     | 24.8  |                 |      |                  |
| 388.3937     | 80.1  |                 |      |                  |
| 389.3974     | 23.8  |                 |      |                  |
| 391.2845     | 10.3  |                 |      |                  |
| 396.3853     | 90.1  |                 |      |                  |
| 397.3874     | 24.2  |                 |      |                  |
| 400.2617     | 25.3  |                 |      |                  |
| 402.2593     | 10.2  |                 |      |                  |
| 403.2501     | 12.0  |                 |      |                  |
| 405.2638     | 44.4  |                 |      |                  |
| 406.2693     | 12.6  |                 |      |                  |
| 427.2464     | 100.0 | +0.8 / +0.4     | 6.5  | C 24 H 36 O 5 Na |
| 428.2478     | 28.2  |                 |      |                  |

Figure S32. <sup>1</sup>H NMR spectrum of a mixture of compounds 6 and 7 in CDCl<sub>3</sub> (600 MHz)

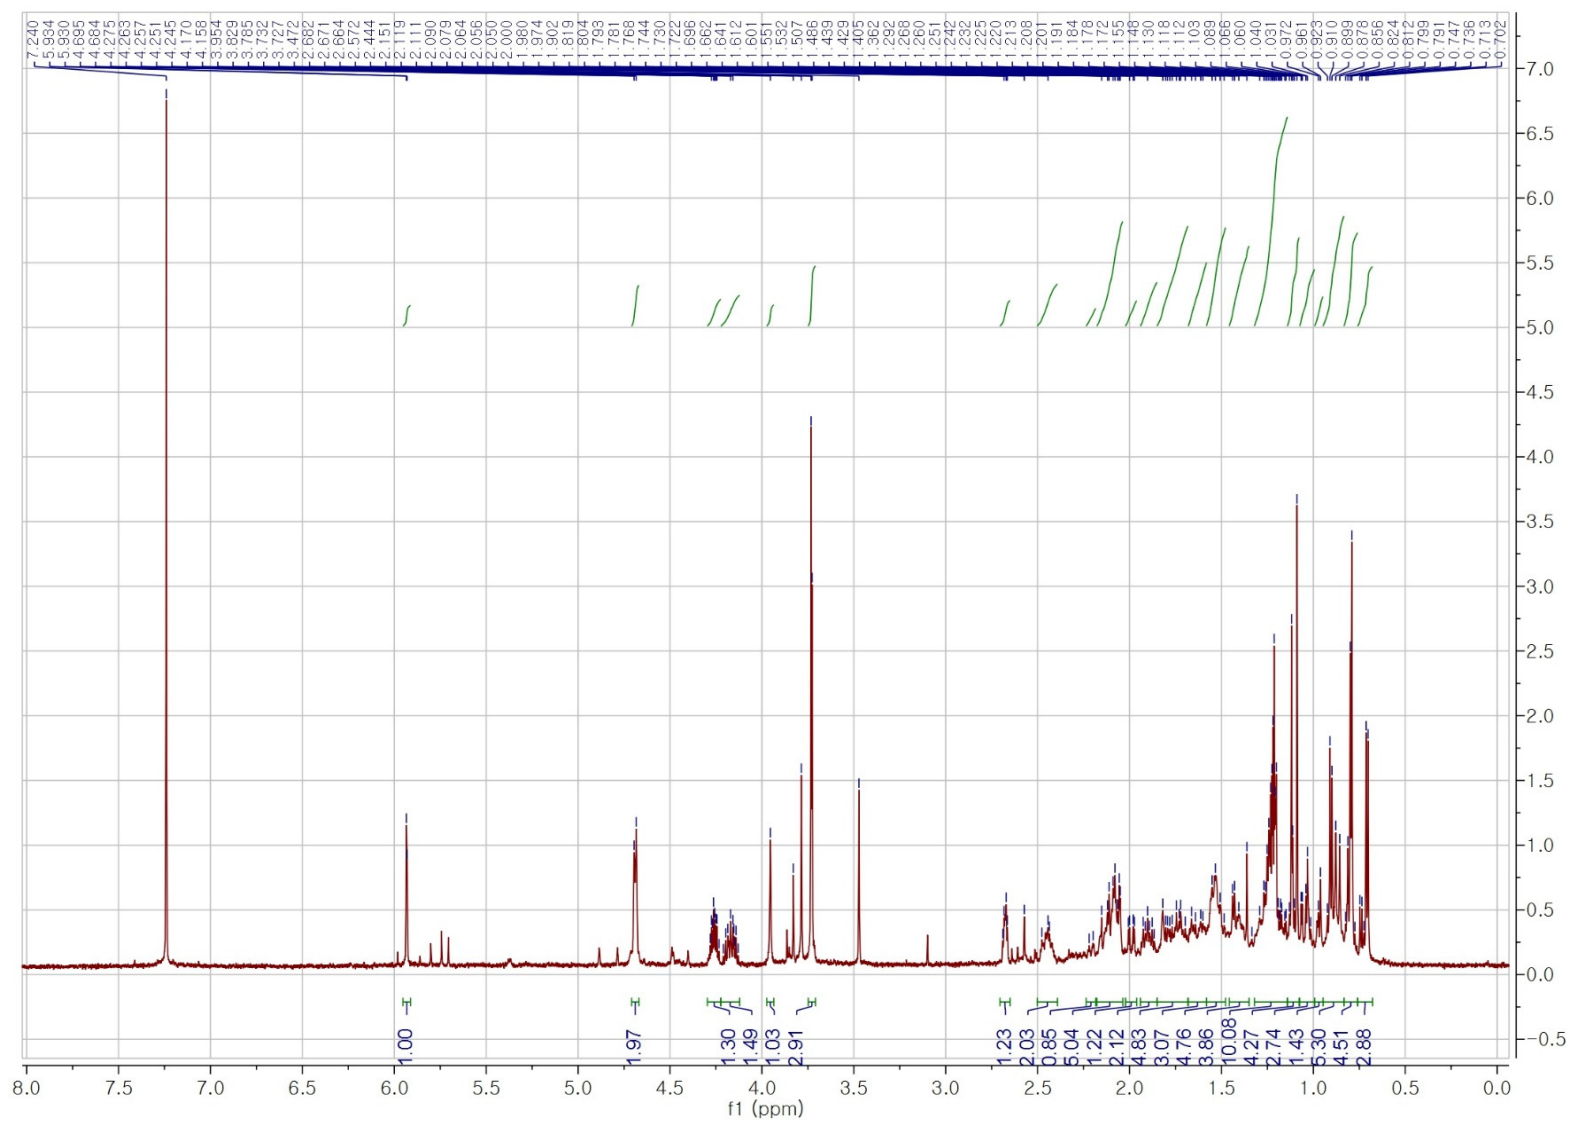



Figure S33.  $^{13}\text{C}$  NMR spectrum of a mixture of compounds 6 and 7  $\text{CDCl}_3$  (150 MHz)

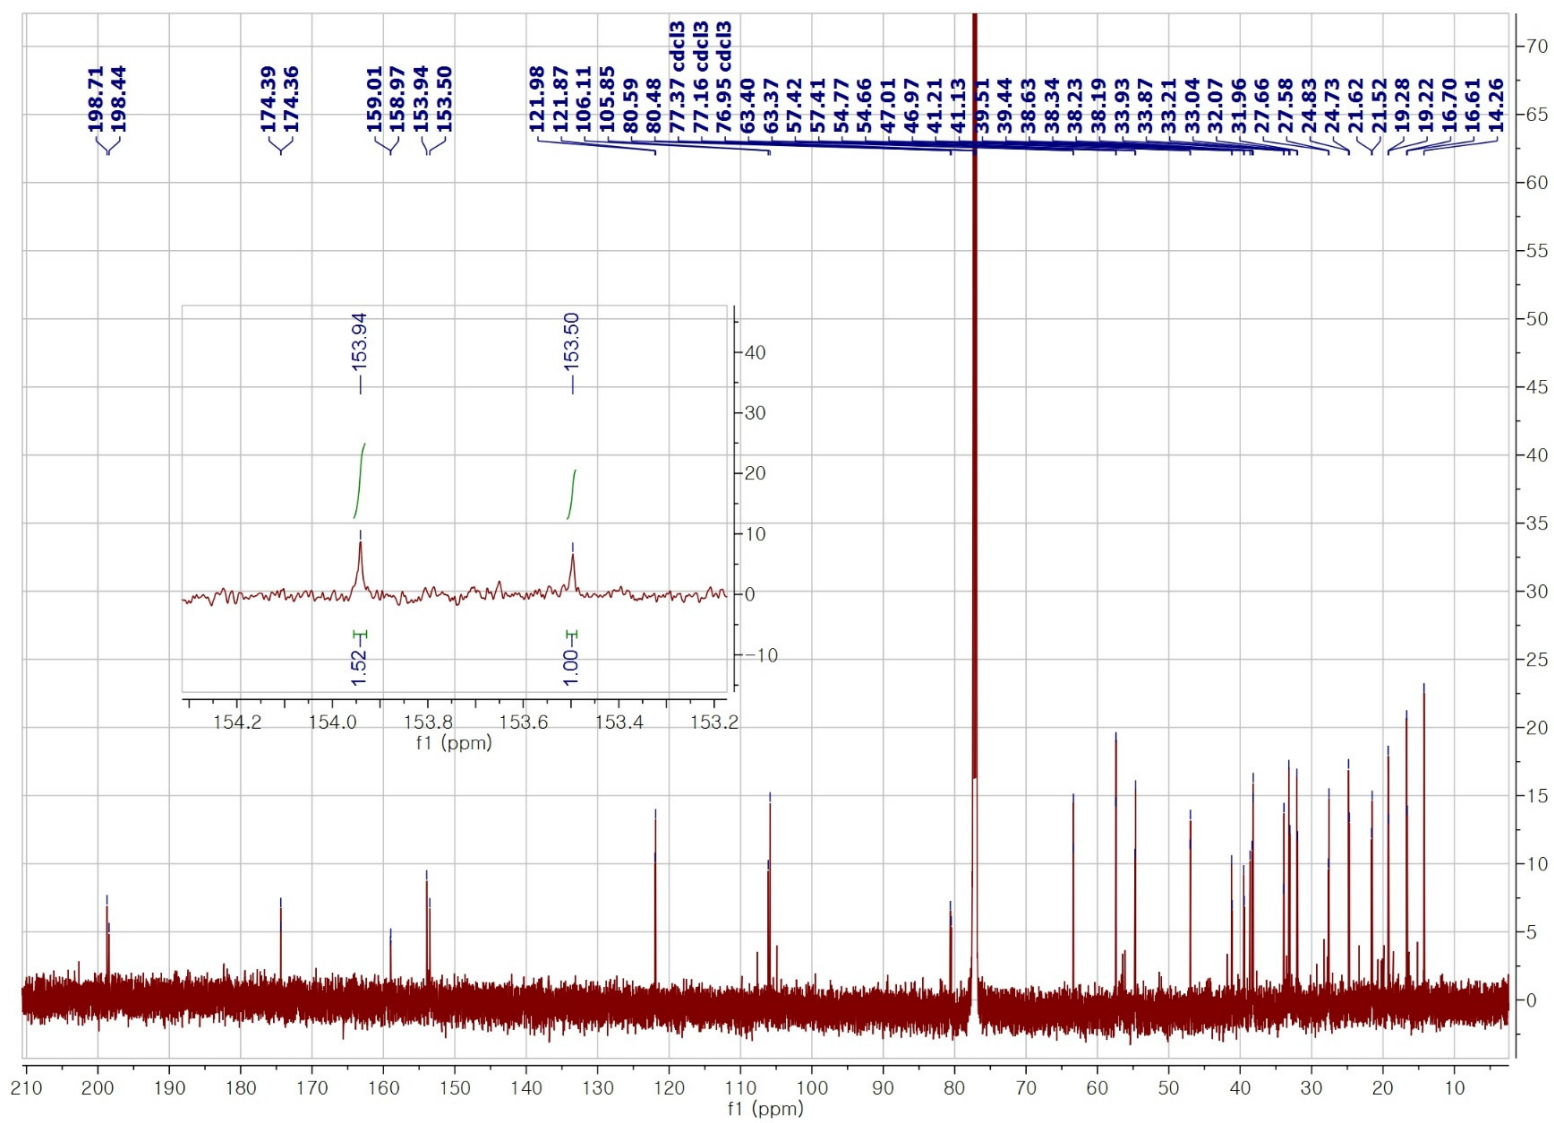

Figure S34. HSQC spectrum of a mixture of compounds 6 and 7 in CDCl<sub>3</sub>

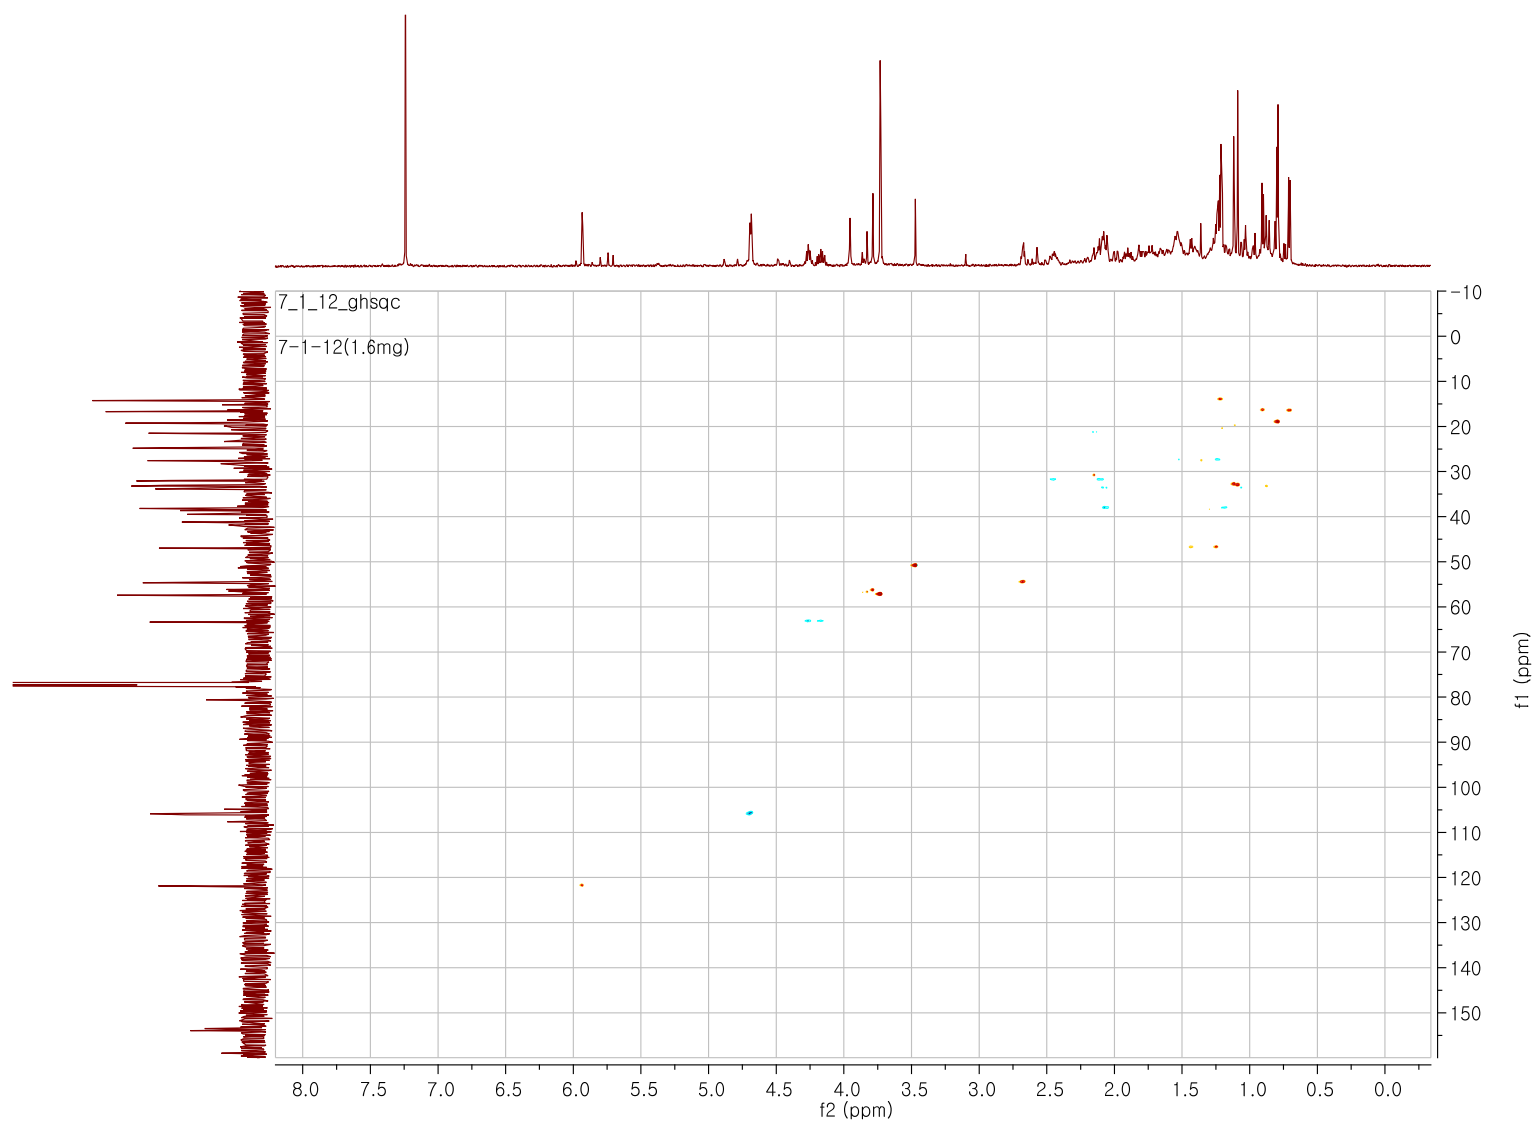

Figure S35. HMBC spectrum of a mixture of compounds 6 and 7 in CDCl<sub>3</sub> and its interpretation

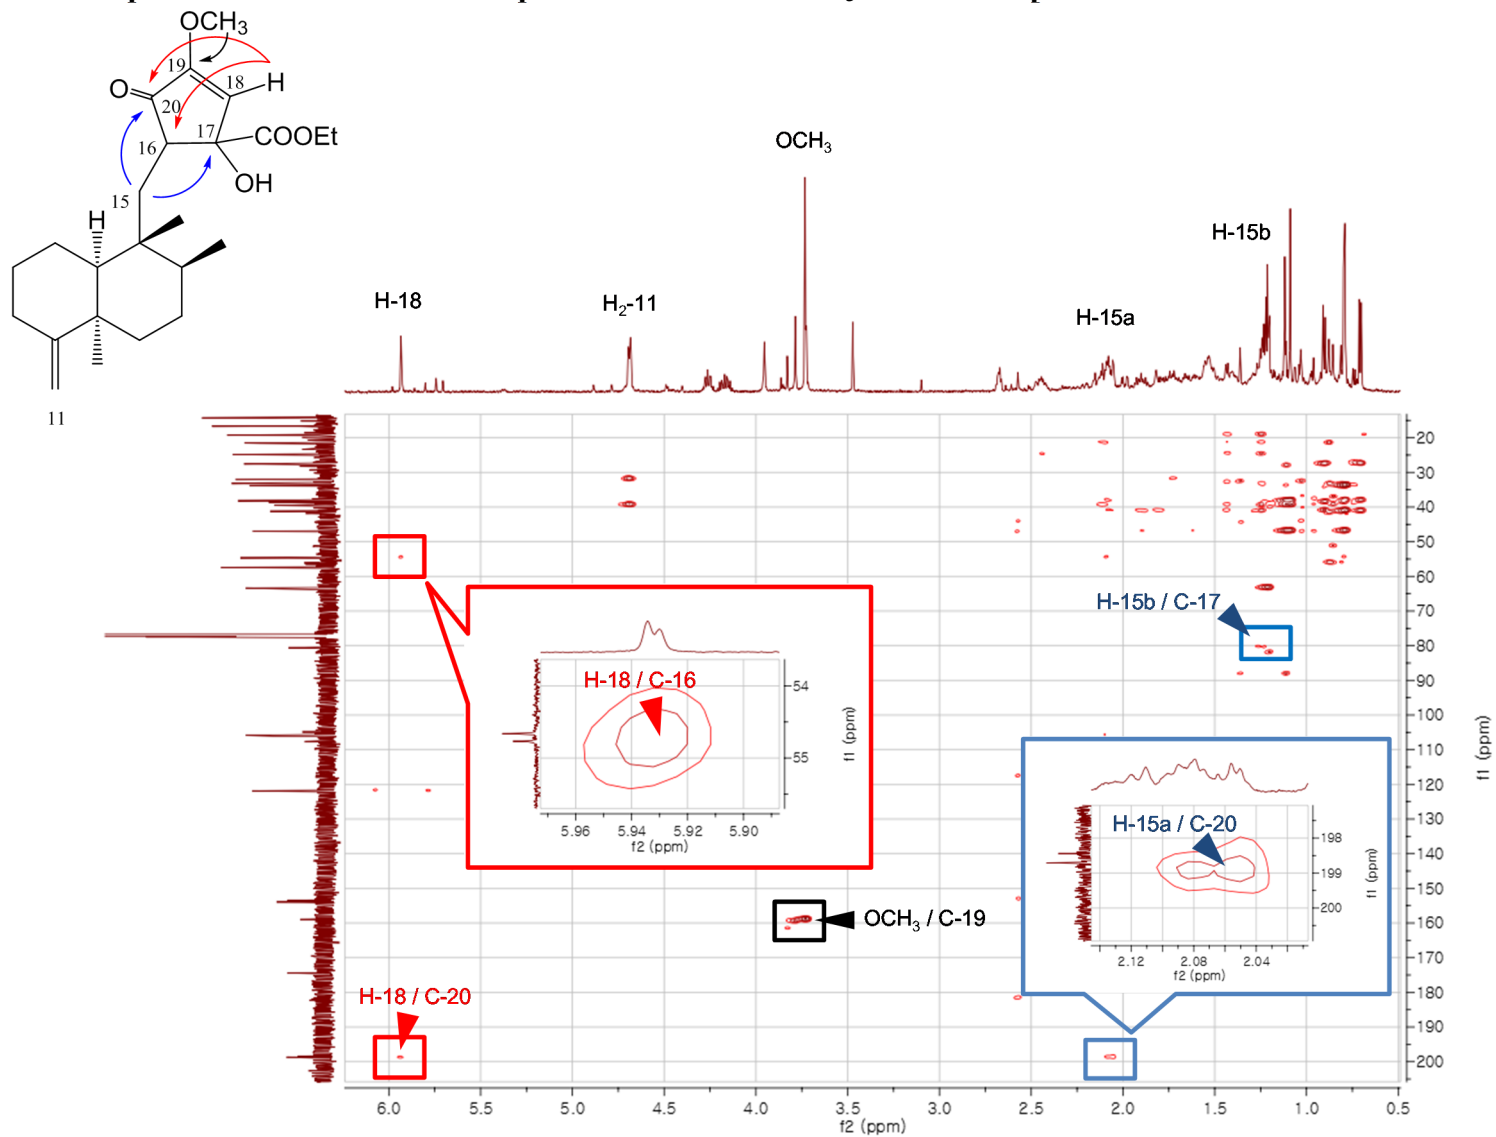

Figure S36. COSY spectrum of a mixture of compounds 6 and 7 in CDCl<sub>3</sub>

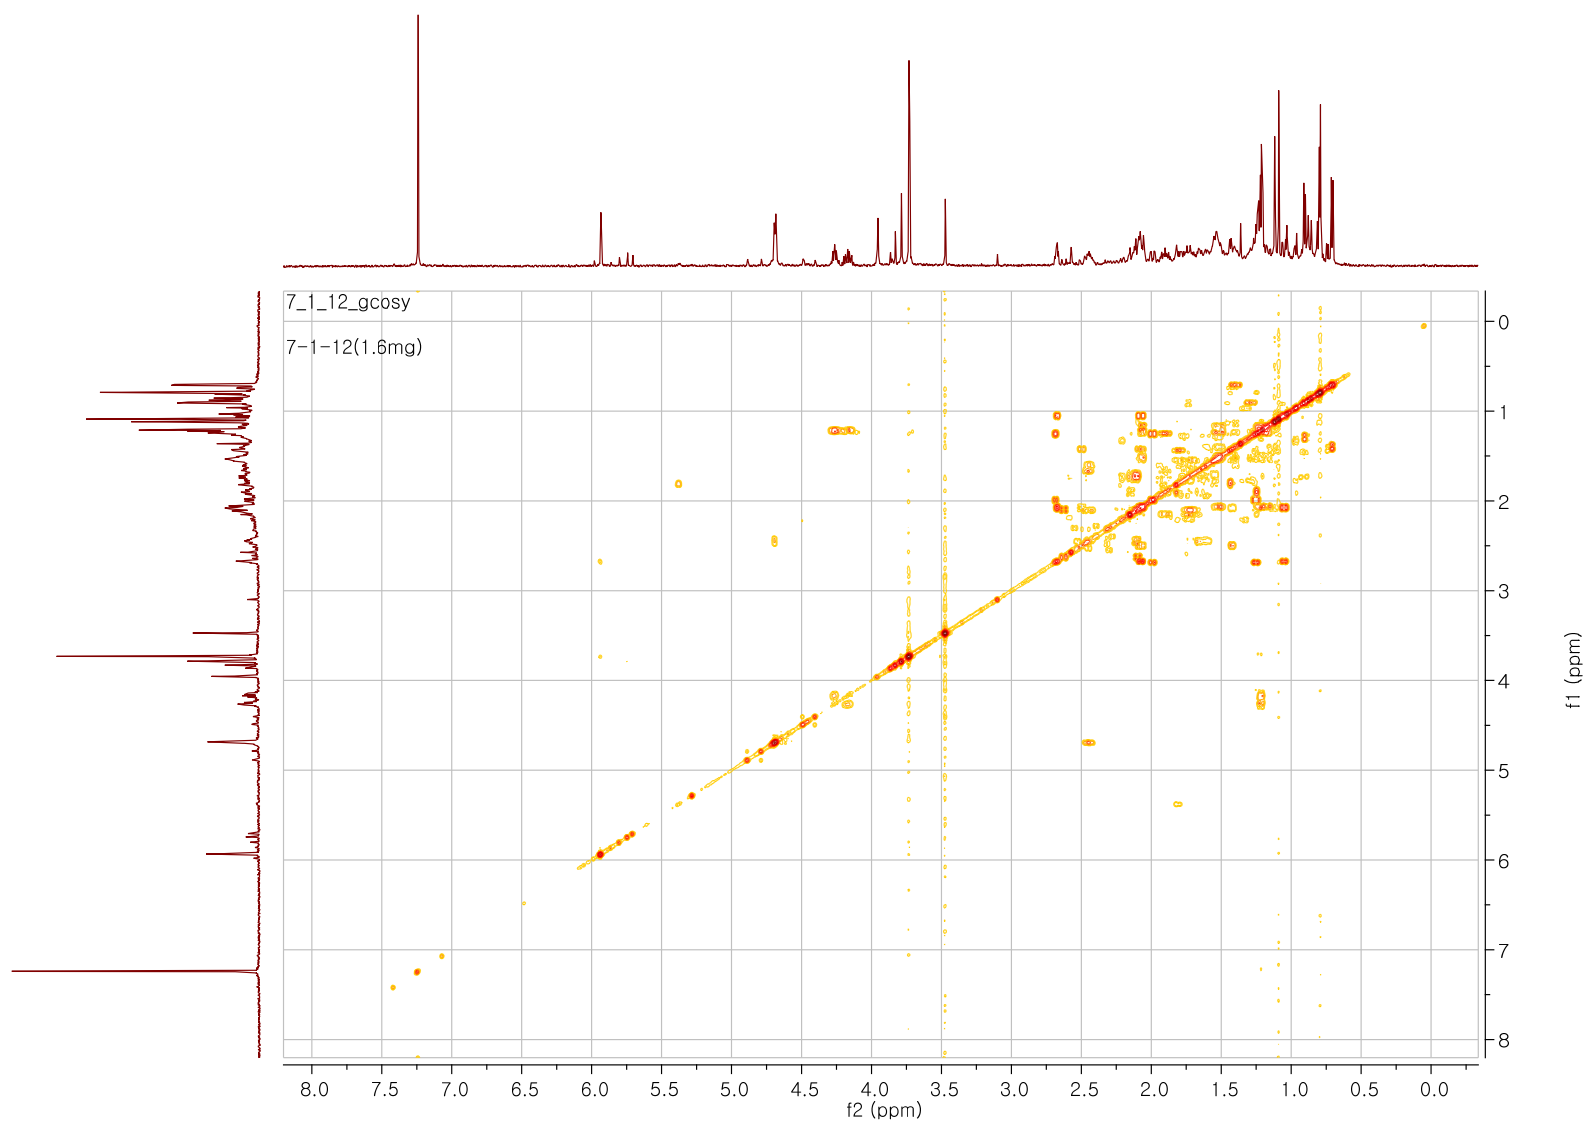

Figure S37. NOESY spectrum of a mixture of compounds 6 and 7 in CDCl<sub>3</sub>

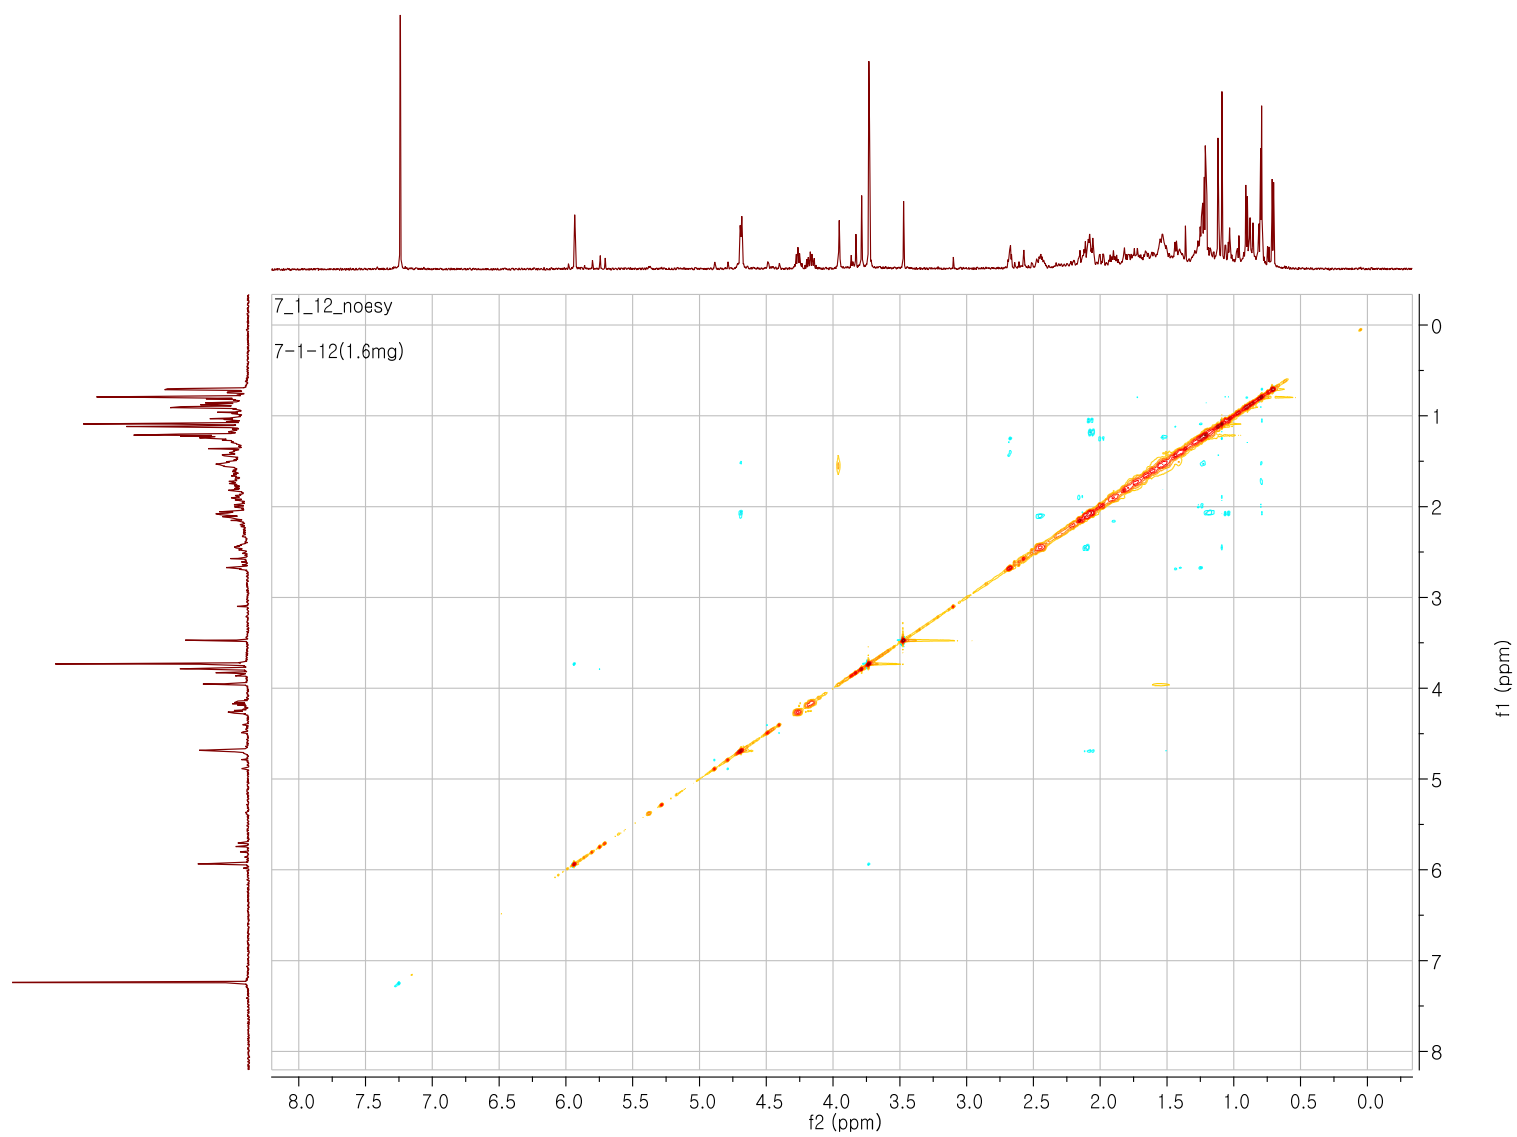

Figure S38. HRFABMS analysis of mixture of compounds 6 and 7

[ Mass Spectrum ]  
Data : Fr-7-1-12-C24H36O5      Date : 17-Mar-2011 13:49  
Sample : -  
Note : -  
Inlet : Direct      Ion Mode : FAB+  
Spectrum Type : Normal Ion [EF-Linear]  
RT : 0.28 min      Scan# : (6,7)  
BP : m/z 369.2441      Int. : 76.62  
Output m/z range : 398.6202 to 437.2552      Cut Level : 0.00 %  
1669171

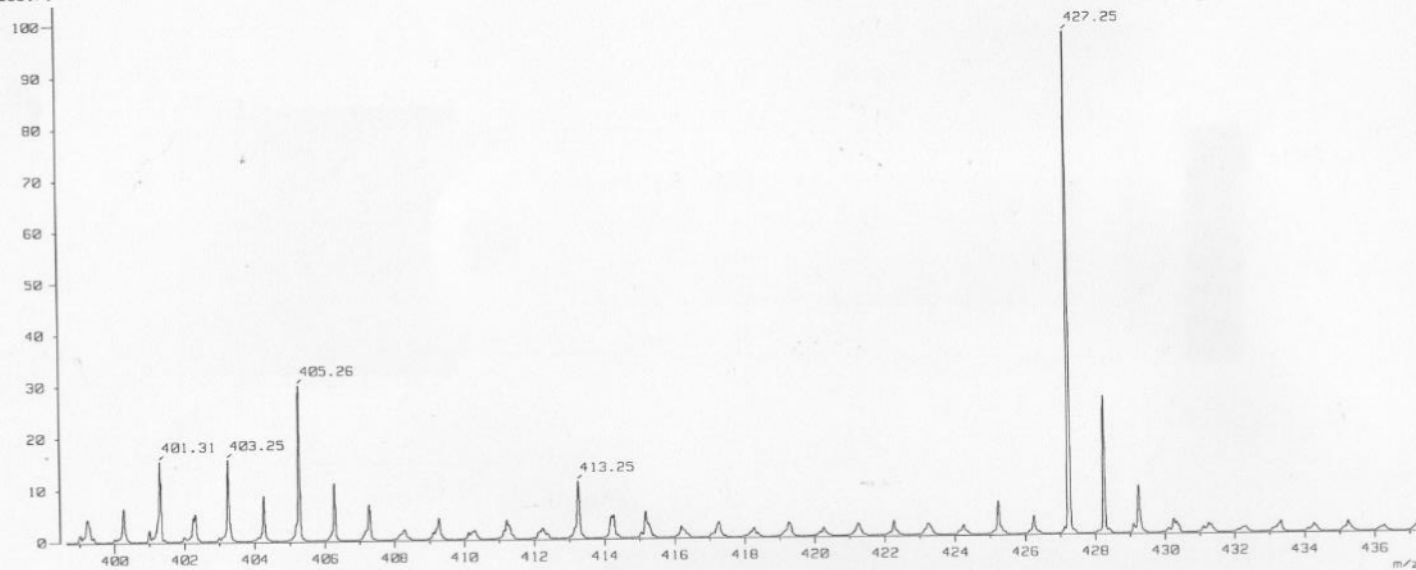

[ Elemental Composition ]

Data : Fr-7-1-12-C24H36O5

Date : 17-Mar-2011 13:49

Page: 1

Sample: -

Note: -

Inlet : Direct

Ion Mode : FAB+

RT : 0.28 min

Scan#: (6,7)

Elements : C 24/0, H 37/1, O 5/1

Mass Tolerance : 1000ppm, 1mmu if m/z < 1, 3mmu if m/z > 3

Unsaturation (U.S.) : -0.5 - 100.0

| Observed m/z | Int%  | Err [ppm / mmu] | U.S. | Composition   |
|--------------|-------|-----------------|------|---------------|
| 369.2441     | 100.0 | +3.1 / +1.1     | 8.5  | C 24 H 33 O 3 |
| 370.2496     | 29.0  | -3.2 / -1.2     | 8.0  | C 24 H 34 O 3 |
| 371.2286     | 13.0  |                 |      |               |
| 373.2374     | 10.1  | -1.2 / -0.5     | 7.5  | C 23 H 33 O 4 |
| 375.2265     | 10.2  |                 |      |               |
| 379.1929     | 12.3  | +5.1 / +1.9     | 11.5 | C 24 H 27 O 4 |
| 387.2527     | 94.3  | -2.2 / -0.8     | 7.5  | C 24 H 35 O 4 |
| 388.2569     | 25.9  |                 |      |               |
| 389.2470     | 10.0  |                 |      |               |
| 391.2847     | 18.5  |                 |      |               |
| 396.3853     | 66.3  |                 |      |               |
| 397.3874     | 18.8  |                 |      |               |
| 401.3073     | 15.5  |                 |      |               |
| 403.2500     | 15.7  | +3.9 / +1.6     | 7.5  | C 24 H 35 O 5 |
| 405.2637     | 30.0  | -1.0 / -0.4     | 6.5  | C 24 H 37 O 5 |
| 406.2727     | 11.1  |                 |      |               |
| 413.2549     | 11.0  |                 |      |               |
| 427.2463     | 97.5  |                 |      |               |
| 428.2516     | 26.6  |                 |      |               |
| 447.3391     | 10.7  |                 |      |               |

Figure S39. <sup>1</sup>H NMR spectrum of compound 8 in CDCl<sub>3</sub> (600 MHz)

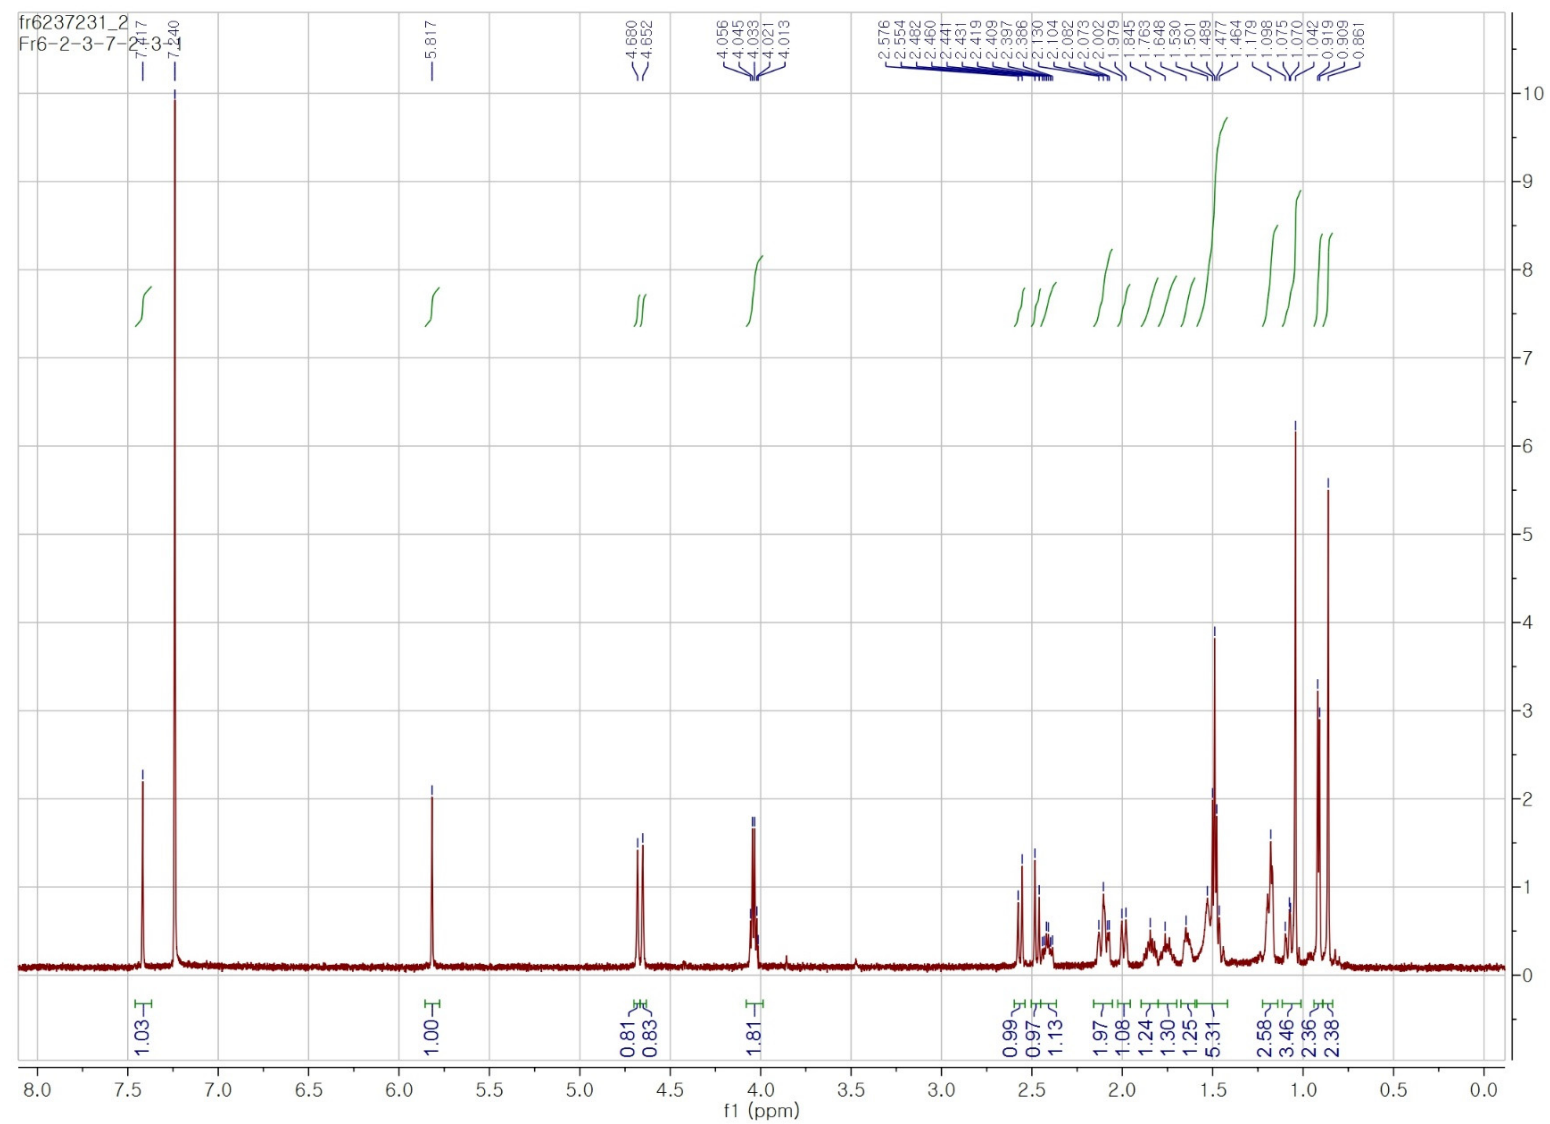



Figure S40.  $^{13}\text{C}$  NMR spectrum of compound 8 in  $\text{CDCl}_3$  (150 MHz)

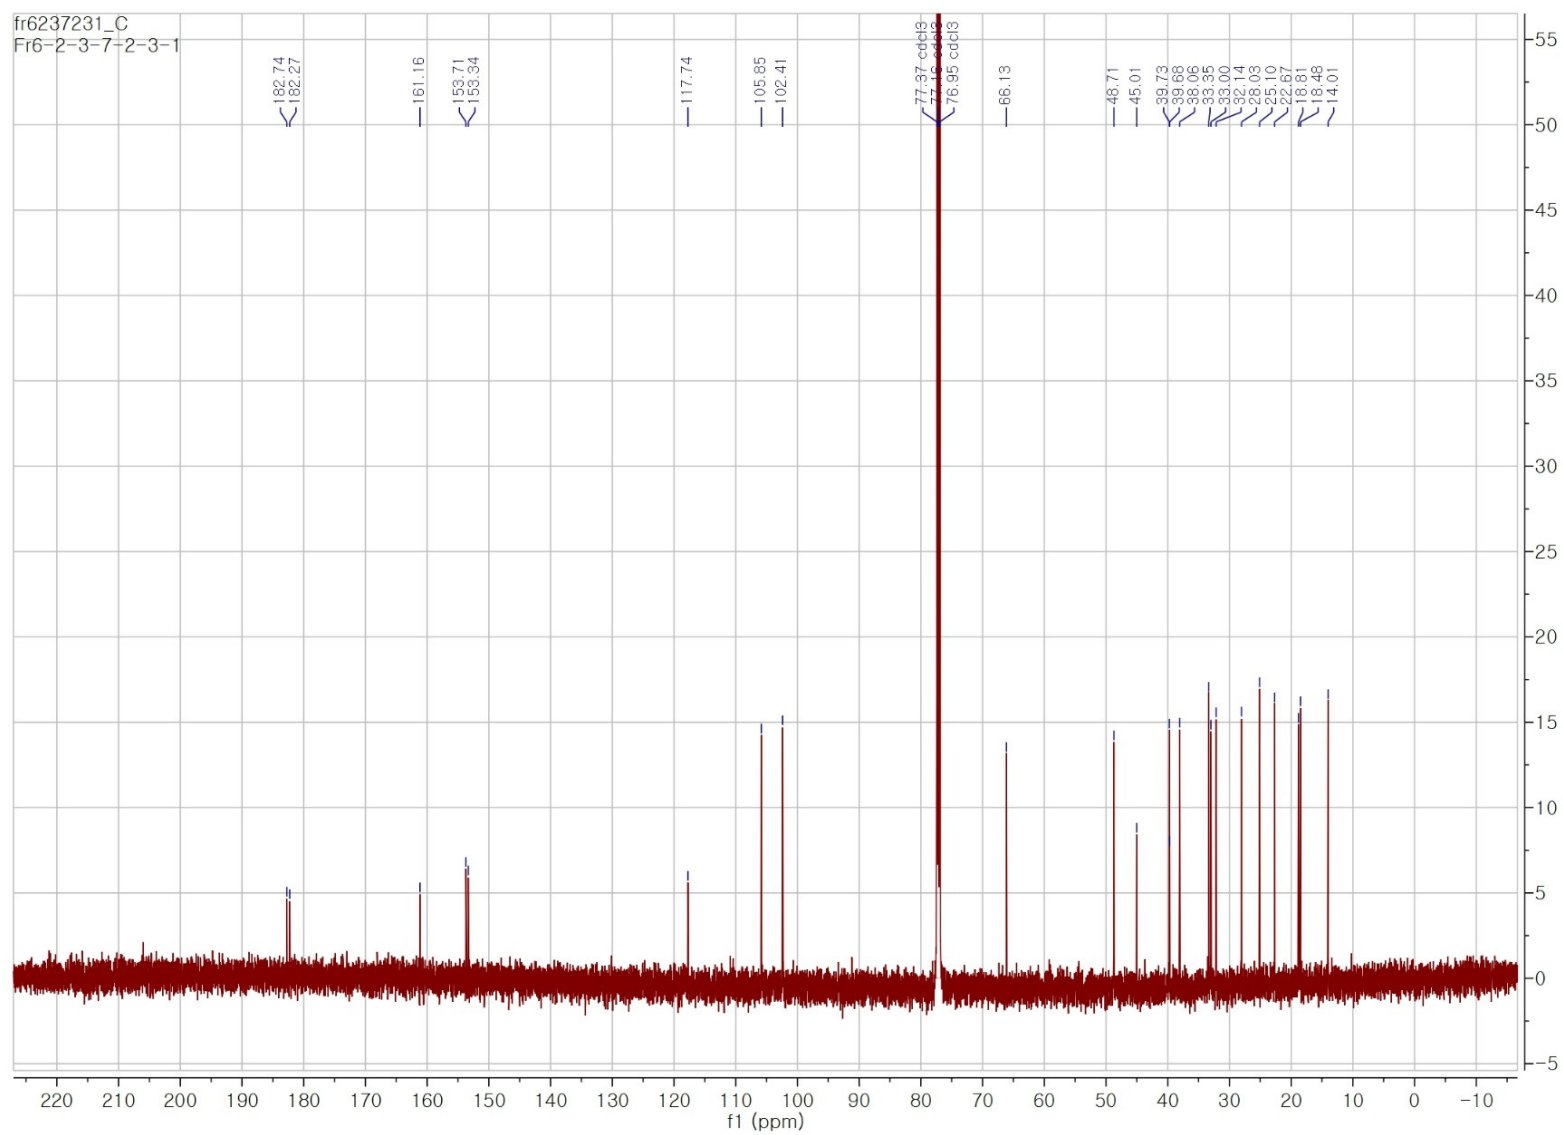

Figure S41. HSQC spectrum of compound 8 in CDCl<sub>3</sub>

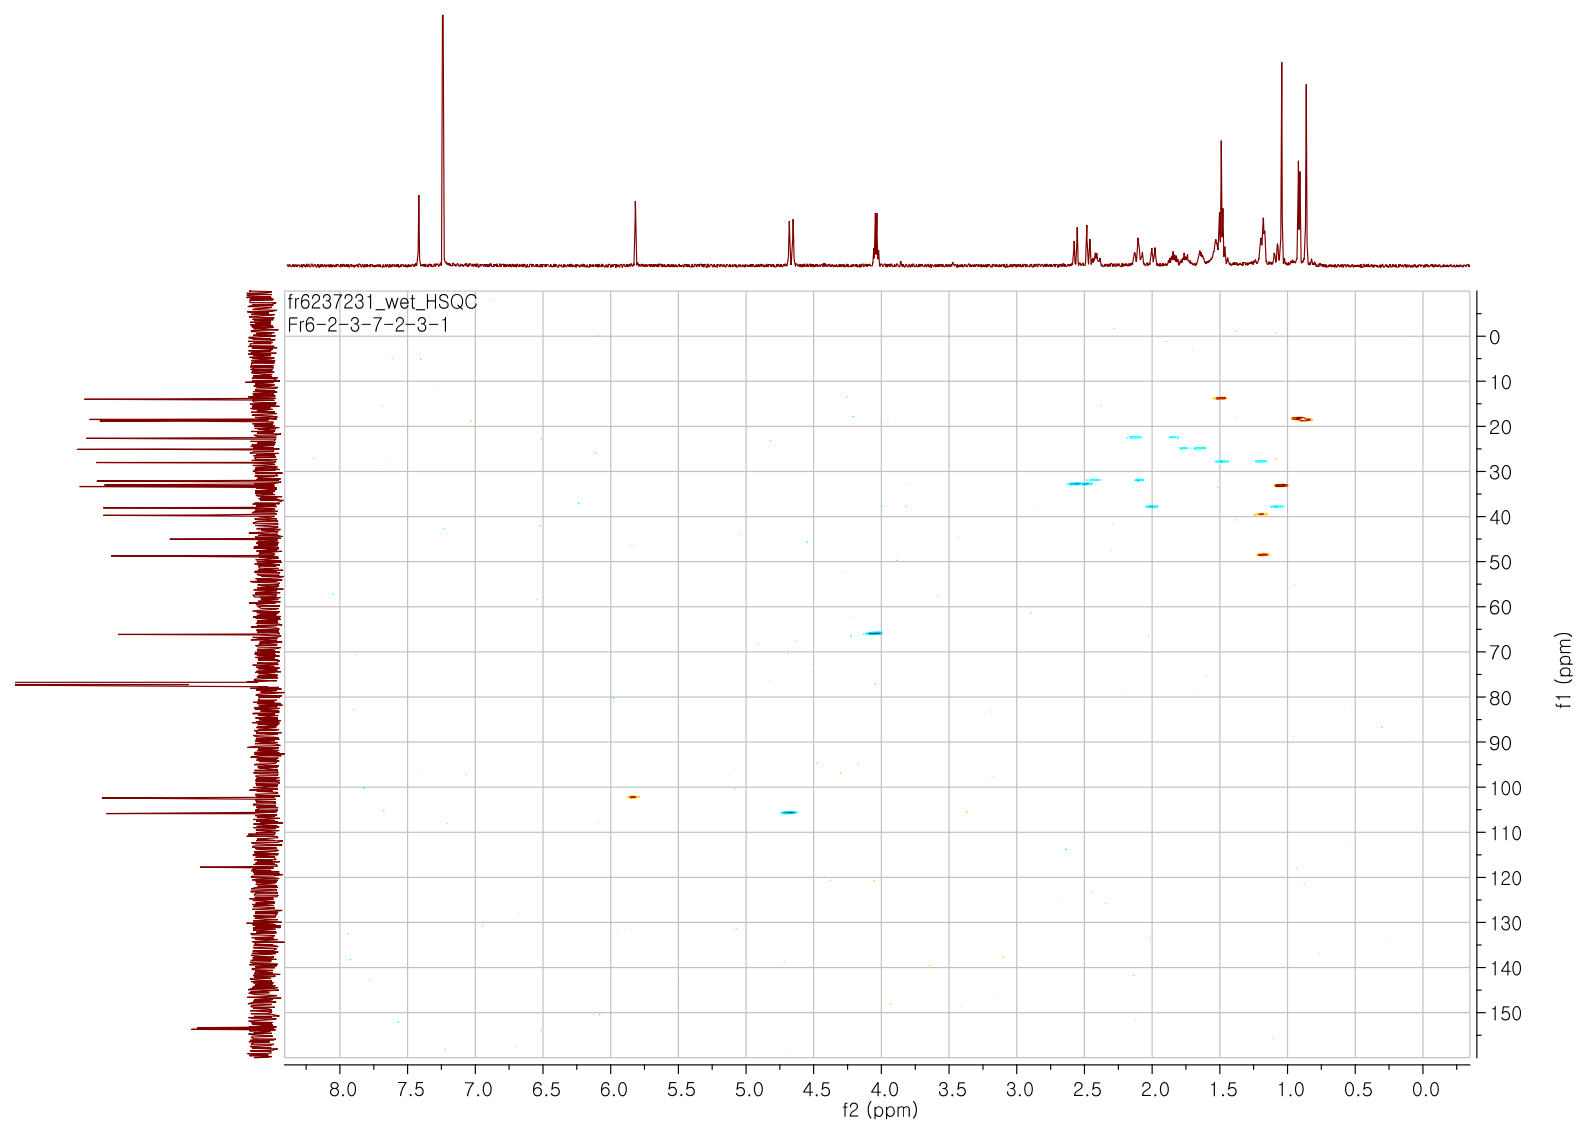

Figure S42. HMBC spectrum of compound 8 in CDCl<sub>3</sub>

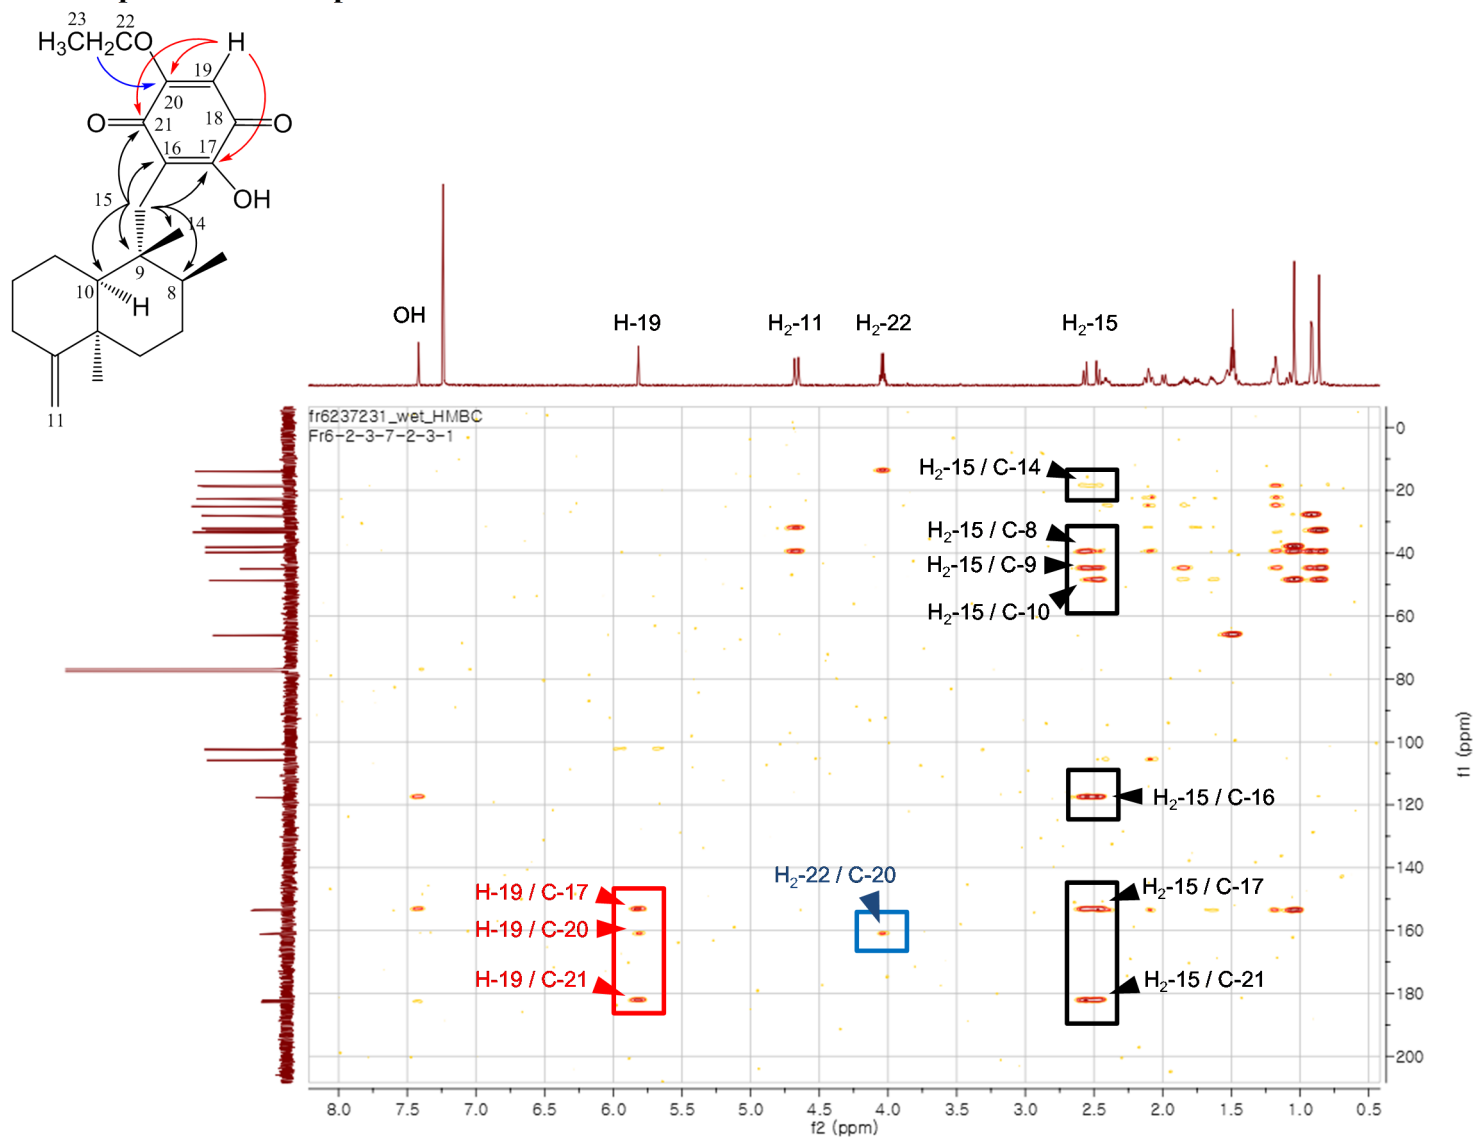

Figure S43. COSY spectrum of compound 8 in CDCl<sub>3</sub>

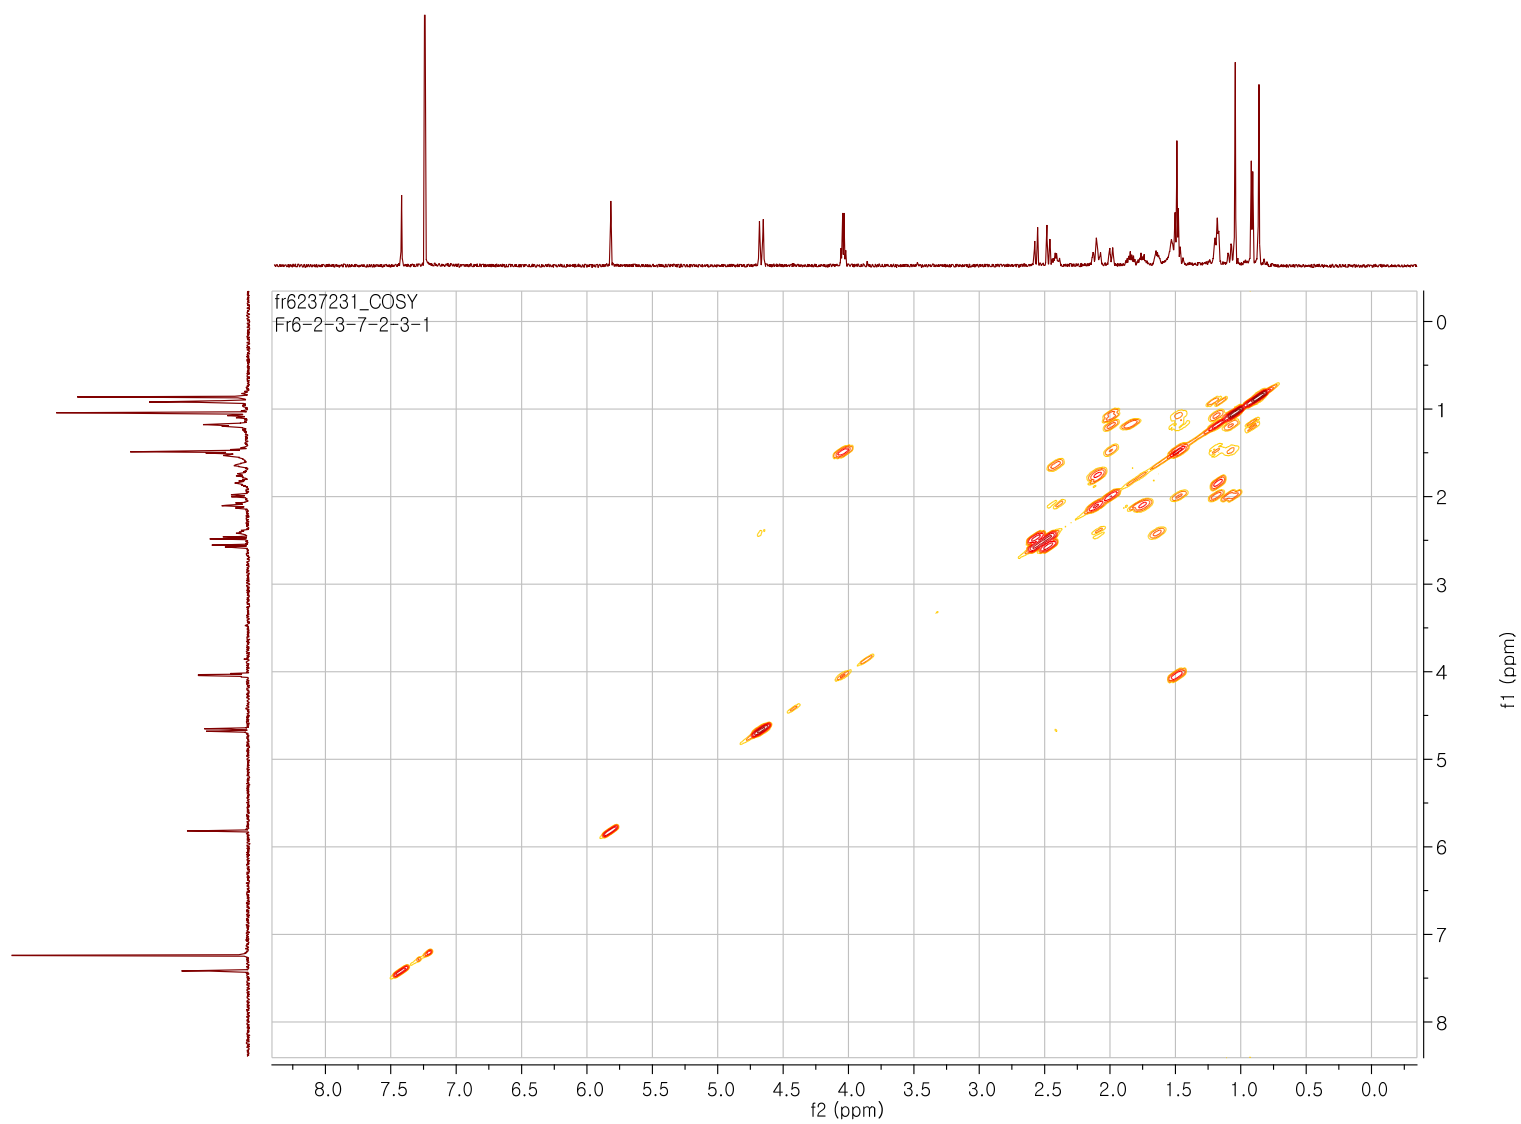

Figure S44. HRFABMS analysis of of compound 8

[ Mass Spectrum ]  
Data : Fr-6-2-3-7-2-3-1-C23H32O4 Date : 11-Apr-2011 10:36  
Sample : -  
Note : -  
Inlet : Direct Ion Mode : FAB+  
Spectrum Type : Normal Ion [EF-Linear]  
RT : 0.43 min Scan# : (9,10)  
BP : m/z 373.2381 Int. : 72.18  
Output m/z range : 356.2315 to 391.6068 Cut Level : 0.00 %  
1631281

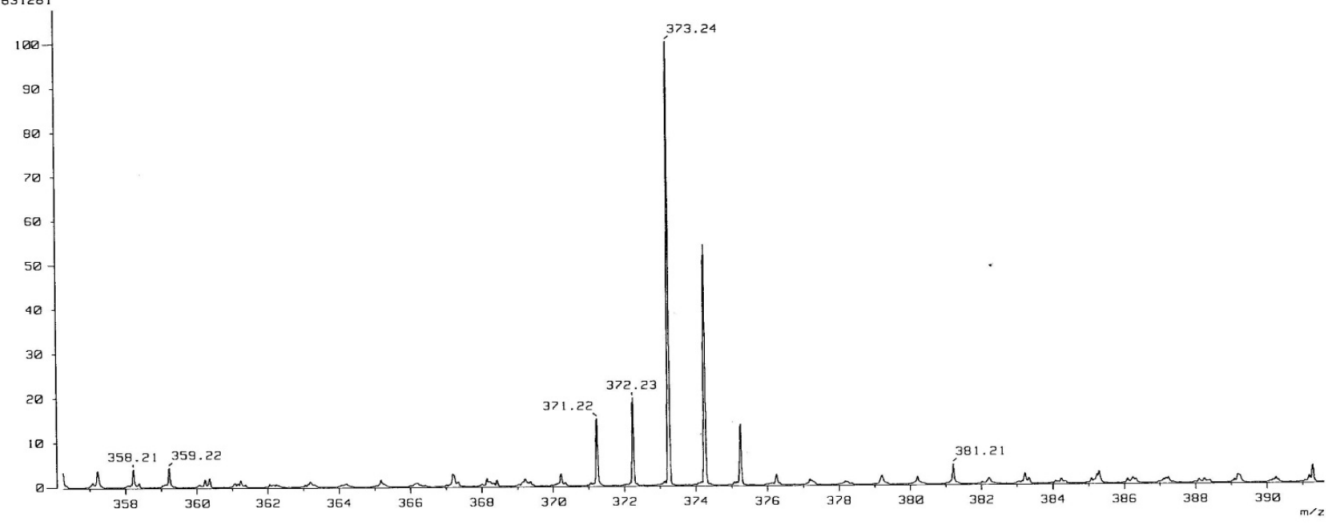

[ Elemental Composition ]

Page: 1

Data : Fr-6-2-3-7-2-3-1-C23H32O4      Date : 11-Apr-2011 10:36  
Sample: -  
Note : -  
Inlet : Direct                              Ion Mode : FAB+  
RT : 0.43 min                              Scan#: (9,10)  
Elements : C 23/0, H 33/1, O 4/1  
Mass Tolerance : 1000ppm, 1mmu if m/z < 1, 3mmu if m/z > 3  
Unsaturation (U.S.) : -0.5 - 100.0

| Observed m/z | Int%  | Err[ppm / mmu] | U.S. | Composition   |
|--------------|-------|----------------|------|---------------|
| 329.0721     | 35.6  |                |      |               |
| 371.2231     | 15.1  | +2.4 / +0.9    | 8.5  | C 23 H 31 O 4 |
| 372.2298     | 19.7  | -0.7 / -0.3    | 8.0  | C 23 H 32 O 4 |
| 373.2381     | 100.0 | +0.6 / +0.2    | 7.5  | C 23 H 33 O 4 |
| 374.2428     | 54.1  |                |      |               |
| 375.2463     | 13.7  |                |      |               |
| 393.2009     | 12.4  |                |      |               |
| 394.2131     | 11.2  |                |      |               |
| 395.2203     | 85.9  |                |      |               |
| 396.2327     | 29.3  |                |      |               |
| 417.3130     | 10.1  |                |      |               |

## Cartesian coordinates of conformers shown in Table S1

Compound **1\_1**

Charge = 0 Multiplicity = 1

Symbolic Z-Matrix:

|   |          |         |        |
|---|----------|---------|--------|
| C | -9.9878  | -1.4549 | 7.903  |
| C | -11.2274 | -1.0361 | 7.1114 |
| C | -11.9816 | -2.2305 | 6.5424 |
| C | -11.0567 | -3.1538 | 5.7739 |
| C | -9.0392  | -2.3305 | 7.0427 |
| C | -7.5913  | -2.5287 | 7.6694 |
| C | -6.7484  | -3.5298 | 6.7917 |
| C | -7.5183  | -4.783  | 6.3551 |
| C | -8.8269  | -4.4393 | 5.6589 |
| C | -11.3686 | -3.4921 | 4.5094 |
| C | -6.828   | -1.1339 | 7.7774 |
| C | -6.578   | -0.3202 | 6.5272 |
| C | -5.4214  | -0.4477 | 5.7305 |
| C | -5.1748  | 0.3056  | 4.5612 |
| C | -6.0915  | 1.2706  | 4.1433 |
| C | -7.2293  | 1.4691  | 4.9349 |
| C | -7.4257  | 0.694   | 6.0688 |
| O | -8.5855  | 1.1264  | 6.6504 |
| C | -9.0279  | 2.1251  | 5.8283 |
| N | -8.2584  | 2.366   | 4.7867 |
| C | -10.2914 | 2.7819  | 6.2161 |
| C | -7.6798  | -3.0463 | 9.13   |
| C | -5.4344  | -4.     | 7.4406 |
| O | -4.4508  | -1.342  | 6.1191 |
| O | -3.9911  | 0.0046  | 3.9283 |
| C | -3.7061  | 0.7256  | 2.7338 |
| H | -9.4899  | -0.5491 | 8.2542 |
| H | -10.3043 | -1.9869 | 8.8058 |
| H | -11.8949 | -0.4533 | 7.7566 |
| H | -10.9277 | -0.3758 | 6.289  |
| H | -12.4644 | -2.7874 | 7.3537 |
| H | -12.7948 | -1.8603 | 5.9059 |
| H | -8.8596  | -1.7564 | 6.1208 |
| H | -6.4848  | -3.0128 | 5.8616 |
| H | -6.9     | -5.3561 | 5.6513 |
| H | -7.689   | -5.4508 | 7.2054 |
| H | -8.586   | -3.8749 | 4.7477 |
| H | -9.3006  | -5.3745 | 5.3327 |
| H | -7.3683  | -0.4888 | 8.4824 |
| H | -5.8611  | -1.2848 | 8.2745 |
| H | -5.9586  | 1.8841  | 3.2633 |
| H | -10.3477 | 2.9099  | 7.3012 |
| H | -10.3689 | 3.7696  | 5.752  |
| H | -11.1463 | 2.1818  | 5.8919 |
| H | -6.6974  | -3.0339 | 9.6166 |
| H | -8.0422  | -4.0716 | 9.1942 |
| H | -8.3266  | -2.4182 | 9.7496 |
| H | -5.619   | -4.6992 | 8.2634 |
| H | -4.8158  | -4.5247 | 6.7035 |
| H | -4.8385  | -3.1748 | 7.8346 |
| H | -3.6034  | 1.7968  | 2.9355 |
| H | -2.7472  | 0.3659  | 2.3484 |
| H | -4.4653  | 0.5363  | 1.9678 |
| H | -10.7533 | -4.1484 | 3.9047 |
| H | -12.2699 | -3.1189 | 4.031  |
| H | -3.7501  | -1.2756 | 5.4408 |
| C | -9.7953  | -3.6248 | 6.5482 |
| C | -10.3143 | -4.5553 | 7.674  |
| H | -10.9656 | -5.3347 | 7.2569 |
| H | -9.5209  | -5.0837 | 8.2014 |
| H | -10.8998 | -4.0292 | 8.4326 |

## Compound 1\_2

Charge = 0 Multiplicity = 1

S-symbolic Z-Matrix:

|   |          |         |         |
|---|----------|---------|---------|
| C | -10.7562 | -1.6373 | 6.5079  |
| C | -11.3837 | -1.9195 | 5.1424  |
| C | -11.5019 | -3.4118 | 4.8584  |
| C | -10.1878 | -4.1336 | 5.0889  |
| C | -9.371   | -2.323  | 6.6392  |
| C | -8.5014  | -1.8015 | 7.863   |
| C | -7.1808  | -2.6515 | 7.9968  |
| C | -7.3959  | -4.1645 | 7.8681  |
| C | -8.1232  | -4.5271 | 6.5812  |
| C | -9.687   | -4.9132 | 4.1132  |
| C | -8.1346  | -0.2622 | 7.6733  |
| C | -7.2918  | 0.1579  | 6.4899  |
| C | -7.8278  | 0.6345  | 5.2769  |
| C | -7.0494  | 1.0222  | 4.1633  |
| C | -5.6562  | 0.9727  | 4.2296  |
| C | -5.0796  | 0.5509  | 5.4338  |
| C | -5.8928  | 0.1771  | 6.4935  |
| O | -5.0671  | -0.1589 | 7.531   |
| C | -3.8064  | 0.0122  | 7.0322  |
| N | -3.7569  | 0.4345  | 5.7853  |
| C | -2.6948  | -0.2978 | 7.9518  |
| C | -9.309   | -1.859  | 9.1869  |
| C | -6.3861  | -2.4017 | 9.2903  |
| O | -9.1925  | 0.7582  | 5.165   |
| O | -7.7804  | 1.4397  | 3.0753  |
| C | -7.0416  | 1.8165  | 1.9179  |
| H | -10.685  | -0.5551 | 6.6308  |
| H | -11.4398 | -1.9759 | 7.2931  |
| H | -12.3767 | -1.4578 | 5.0934  |
| H | -10.7783 | -1.4467 | 4.3588  |
| H | -12.2756 | -3.8509 | 5.4989  |
| H | -11.8539 | -3.5446 | 3.8278  |
| H | -8.7989  | -2.0136 | 5.7511  |
| H | -6.5267  | -2.3829 | 7.1595  |
| H | -6.4191  | -4.6663 | 7.8587  |
| H | -7.9206  | -4.5599 | 8.7435  |
| H | -7.4956  | -4.2086 | 5.7377  |
| H | -8.1964  | -5.621  | 6.5218  |
| H | -9.0523  | 0.3385  | 7.6782  |
| H | -7.6075  | 0.0873  | 8.5714  |
| H | -5.0058  | 1.259   | 3.4151  |
| H | -1.7308  | -0.1574 | 7.4541  |
| H | -2.7282  | 0.358   | 8.8268  |
| H | -2.7574  | -1.3358 | 8.2917  |
| H | -8.771   | -1.363  | 10.0032 |
| H | -9.503   | -2.878  | 9.5196  |
| H | -10.2687 | -1.3402 | 9.1045  |
| H | -6.8921  | -2.8282 | 10.163  |
| H | -5.3998  | -2.8751 | 9.2251  |
| H | -6.2222  | -1.3402 | 9.4852  |
| H | -6.4562  | 0.9755  | 1.532   |
| H | -7.7592  | 2.1057  | 1.1441  |
| H | -6.4047  | 2.6834  | 2.1223  |
| H | -8.7553  | -5.4581 | 4.2124  |
| H | -10.2068 | -5.0367 | 3.1672  |
| H | -9.3497  | 1.0862  | 4.2577  |
| C | -9.5261  | -3.8849 | 6.4723  |
| C | -10.4486 | -4.5709 | 7.5123  |
| H | -10.6171 | -5.6212 | 7.24    |
| H | -10.0309 | -4.5877 | 8.5184  |
| H | -11.4347 | -4.1056 | 7.5894  |



**Compound 2\_1**

Charge = 0 Multiplicity = 1

Symbolic Z-Matrix:

|   |          |         |         |
|---|----------|---------|---------|
| C | -13.7193 | 1.5212  | 9.549   |
| C | -12.8144 | 0.3078  | 9.3329  |
| C | -13.4882 | -0.8193 | 8.5714  |
| C | -14.1614 | -0.3197 | 7.312   |
| C | -15.1549 | 0.8423  | 7.5124  |
| C | -14.4846 | 2.0403  | 8.2949  |
| C | -13.6787 | 3.1242  | 7.4355  |
| C | -14.4549 | 3.4644  | 6.1082  |
| C | -14.9038 | 2.2119  | 5.3513  |
| C | -15.8174 | 1.3622  | 6.2131  |
| C | -13.8844 | -0.9302 | 6.1454  |
| C | -13.4512 | 4.4502  | 8.2847  |
| C | -14.6543 | 5.2223  | 8.7774  |
| C | -15.2137 | 5.0573  | 10.0609 |
| C | -16.3373 | 5.7707  | 10.534  |
| C | -16.9543 | 6.7248  | 9.7233  |
| C | -16.4061 | 6.9502  | 8.4545  |
| C | -15.303  | 6.2183  | 8.0403  |
| O | -14.9764 | 6.6624  | 6.7888  |
| C | -15.9106 | 7.6209  | 6.5127  |
| N | -16.7874 | 7.832   | 7.473   |
| C | -15.8036 | 8.2733  | 5.1935  |
| C | -12.2577 | 2.6178  | 7.0815  |
| C | -13.6961 | 4.3571  | 5.1098  |
| O | -14.6267 | 4.1601  | 10.9227 |
| O | -16.7246 | 5.4412  | 11.8121 |
| C | -17.8583 | 6.1285  | 12.3317 |
| H | -14.4618 | 1.2501  | 10.311  |
| H | -13.1195 | 2.3108  | 10.0079 |
| H | -11.8981 | 0.5933  | 8.8097  |
| H | -12.486  | -0.0671 | 10.3104 |
| H | -12.7359 | -1.5858 | 8.346   |
| H | -14.2266 | -1.313  | 9.2132  |
| H | -15.3377 | 2.6064  | 8.6937  |
| H | -15.3707 | 4.0008  | 6.384   |
| H | -15.4605 | 2.5078  | 4.4526  |
| H | -14.0394 | 1.6416  | 4.998   |
| H | -16.6935 | 1.9752  | 6.4697  |
| H | -16.2173 | 0.5319  | 5.6174  |
| H | -12.808  | 4.2317  | 9.1458  |
| H | -12.8421 | 5.149   | 7.6963  |
| H | -17.8143 | 7.305   | 10.0271 |
| H | -16.6075 | 9.0027  | 5.0567  |
| H | -14.8469 | 8.7956  | 5.1017  |
| H | -15.8738 | 7.5312  | 4.3927  |
| H | -11.7144 | 3.3327  | 6.4549  |
| H | -12.2759 | 1.665   | 6.5481  |
| H | -11.639  | 2.5046  | 7.9762  |
| H | -14.3818 | 4.7184  | 4.3344  |
| H | -13.2499 | 5.2355  | 5.5788  |
| H | -12.8984 | 3.8075  | 4.5988  |
| H | -17.6679 | 7.2044  | 12.4038 |
| H | -18.7525 | 5.9223  | 11.7344 |
| H | -18.04   | 5.754   | 13.3436 |
| H | -14.3453 | -0.6519 | 5.2054  |
| H | -13.1785 | -1.7547 | 6.0936  |
| H | -15.1583 | 4.2011  | 11.7419 |
| C | -16.3406 | 0.2792  | 8.356   |
| H | -17.1091 | 1.0447  | 8.5181  |
| H | -16.8211 | -0.564  | 7.8445  |
| H | -16.0385 | -0.0703 | 9.3473  |

**Compound 2\_2**

Charge = 0 Multiplicity = 1

Symbolic Z-Matrix:

|   |          |         |         |
|---|----------|---------|---------|
| C | -14.2338 | 3.0897  | 5.7052  |
| C | -14.0306 | 1.9598  | 4.6954  |
| C | -12.8378 | 1.0747  | 5.0108  |
| C | -12.8386 | 0.6236  | 6.4551  |
| C | -12.9451 | 1.7528  | 7.4988  |
| C | -14.1883 | 2.6822  | 7.2081  |
| C | -15.6029 | 2.2354  | 7.8123  |
| C | -15.4303 | 1.6954  | 9.2811  |
| C | -14.2942 | 0.676   | 9.4041  |
| C | -12.9728 | 1.2812  | 8.9733  |
| C | -12.7109 | -0.6888 | 6.7229  |
| C | -16.6252 | 3.4548  | 7.8035  |
| C | -16.2625 | 4.7242  | 8.54    |
| C | -16.6214 | 4.9842  | 9.8776  |
| C | -16.2847 | 6.1669  | 10.5732 |
| C | -15.5694 | 7.1791  | 9.9311  |
| C | -15.227  | 6.9795  | 8.5881  |
| C | -15.5819 | 5.7975  | 7.9553  |
| O | -15.1447 | 5.8891  | 6.6627  |
| C | -14.5356 | 7.1107  | 6.5953  |
| N | -14.5563 | 7.8021  | 7.7165  |
| C | -13.9478 | 7.474   | 5.2915  |
| C | -16.2673 | 1.1406  | 6.9399  |
| C | -16.6853 | 1.0527  | 9.8995  |
| O | -17.3635 | 4.0441  | 10.5534 |
| O | -16.724  | 6.206   | 11.8762 |
| C | -16.4033 | 7.3757  | 12.6222 |
| H | -13.4454 | 3.834   | 5.5317  |
| H | -15.1655 | 3.6041  | 5.4573  |
| H | -14.926  | 1.3374  | 4.6212  |
| H | -13.8976 | 2.3968  | 3.6978  |
| H | -12.8483 | 0.2186  | 4.3244  |
| H | -11.9081 | 1.6129  | 4.7941  |
| H | -13.9534 | 3.608   | 7.75    |
| H | -15.1574 | 2.545   | 9.9193  |
| H | -14.1995 | 0.3599  | 10.4512 |
| H | -14.524  | -0.2297 | 8.8346  |
| H | -12.7708 | 2.1363  | 9.6342  |
| H | -12.1608 | 0.5703  | 9.1723  |
| H | -16.8336 | 3.7379  | 6.7636  |
| H | -17.6043 | 3.117   | 8.1656  |
| H | -15.2834 | 8.1067  | 10.4069 |
| H | -13.4736 | 8.4585  | 5.3422  |
| H | -13.1895 | 6.7426  | 4.9968  |
| H | -14.7212 | 7.5048  | 4.5184  |
| H | -17.2142 | 0.7964  | 7.3686  |
| H | -15.6287 | 0.2636  | 6.8142  |
| H | -16.5325 | 1.5237  | 5.9507  |
| H | -16.545  | 0.9203  | 10.9786 |
| H | -17.5846 | 1.6548  | 9.7626  |
| H | -16.8813 | 0.0602  | 9.4796  |
| H | -16.8131 | 7.2514  | 13.6292 |
| H | -15.3194 | 7.4986  | 12.7164 |
| H | -16.8672 | 8.264   | 12.181  |
| H | -12.6737 | -1.0882 | 7.7293  |
| H | -12.6272 | -1.4224 | 5.9257  |
| H | -17.5007 | 4.4145  | 11.4475 |
| C | -11.6362 | 2.5949  | 7.3846  |
| H | -11.5046 | 3.0597  | 6.4034  |
| H | -11.6256 | 3.4106  | 8.1177  |
| H | -10.752  | 1.9737  | 7.573   |

### Compound 3\_1

Charge = 0 Multiplicity = 1

Symbolic Z-Matrix:

|   |          |          |         |
|---|----------|----------|---------|
| C | -16.0098 | -9.6293  | 4.7207  |
| C | -14.9995 | -8.5896  | 4.2345  |
| C | -13.8743 | -9.213   | 3.4182  |
| C | -13.2457 | -10.392  | 4.1372  |
| C | -15.3118 | -10.7562 | 5.5268  |
| C | -16.3108 | -11.6727 | 6.3563  |
| C | -15.5283 | -12.8684 | 7.0248  |
| C | -14.5307 | -13.5621 | 6.0893  |
| C | -13.5506 | -12.5753 | 5.4716  |
| C | -11.9114 | -10.4202 | 4.3092  |
| C | -17.039  | -10.8189 | 7.4909  |
| C | -16.1926 | -10.1897 | 8.5815  |
| C | -15.7014 | -8.7877  | 8.4017  |
| C | -14.7378 | -8.2219  | 9.4163  |
| C | -14.5065 | -8.8709  | 10.562  |
| C | -15.1313 | -10.1624 | 10.8085 |
| C | -15.9547 | -10.7644 | 9.7669  |
| O | -16.4198 | -11.992  | 10.1753 |
| C | -15.8386 | -12.0729 | 11.4996 |
| N | -15.0146 | -10.885  | 11.8788 |
| C | -14.9399 | -13.3101 | 11.5388 |
| C | -17.4537 | -12.213  | 5.4583  |
| C | -16.4249 | -13.9571 | 7.6395  |
| O | -16.0999 | -8.1065  | 7.4626  |
| O | -14.1192 | -6.9913  | 9.233   |
| C | -13.6712 | -6.7409  | 7.9029  |
| H | -16.7645 | -9.1138  | 5.3178  |
| H | -16.5469 | -10.0369 | 3.8583  |
| H | -15.5142 | -7.8332  | 3.6309  |
| H | -14.5736 | -8.0649  | 5.0985  |
| H | -14.2596 | -9.5424  | 2.4463  |
| H | -13.1302 | -8.4372  | 3.1991  |
| H | -14.711  | -10.2465 | 6.2951  |
| H | -14.9219 | -12.4558 | 7.84    |
| H | -13.9537 | -14.2994 | 6.6631  |
| H | -15.054  | -14.1349 | 5.3172  |
| H | -12.9763 | -12.1152 | 6.2874  |
| H | -12.832  | -13.1375 | 4.8608  |
| H | -17.6531 | -10.0388 | 7.0248  |
| H | -17.7887 | -11.4576 | 7.9778  |
| H | -13.8525 | -8.474   | 11.3278 |
| H | -14.1297 | -13.2227 | 10.8054 |
| H | -14.4878 | -13.4493 | 12.5264 |
| H | -15.5038 | -14.2126 | 11.278  |
| H | -18.2201 | -12.7237 | 6.0528  |
| H | -17.1045 | -12.9332 | 4.7192  |
| H | -17.9741 | -11.4089 | 4.9295  |
| H | -15.8231 | -14.6444 | 8.2452  |
| H | -17.1992 | -13.5472 | 8.2903  |
| H | -16.9194 | -14.5554 | 6.8668  |
| H | -12.8654 | -6.0024  | 7.9578  |
| H | -13.2681 | -7.6422  | 7.4281  |
| H | -14.4746 | -6.3053  | 7.3028  |
| H | -11.3963 | -11.2335 | 4.8073  |
| H | -11.2781 | -9.6183  | 3.9395  |
| C | -14.2405 | -11.4811 | 4.6236  |
| C | -14.8021 | -12.1497 | 3.3431  |
| H | -15.4198 | -13.0239 | 3.5461  |
| H | -15.4058 | -11.4741 | 2.7316  |
| H | -13.9815 | -12.5029 | 2.7049  |
| C | -16.9797 | -12.2066 | 12.5086 |
| H | -16.6035 | -12.3057 | 13.5322 |
| H | -17.6326 | -11.3268 | 12.4728 |
| H | -17.6076 | -13.0743 | 12.2778 |

**Compound 3\_2**

Charge = 0 Multiplicity = 1

Symbolic Z-Matrix:

|   |          |          |         |
|---|----------|----------|---------|
| C | -17.1114 | -11.276  | 5.7315  |
| C | -17.6316 | -9.9273  | 5.235   |
| C | -16.9939 | -9.5072  | 3.9178  |
| C | -15.4812 | -9.5837  | 3.988   |
| C | -15.5652 | -11.273  | 5.8561  |
| C | -14.9777 | -12.5097 | 6.6646  |
| C | -13.4027 | -12.4797 | 6.6333  |
| C | -12.8089 | -12.1858 | 5.2495  |
| C | -13.3726 | -10.9089 | 4.6439  |
| C | -14.753  | -8.5023  | 3.6551  |
| C | -15.4897 | -12.4762 | 8.1751  |
| C | -15.1802 | -11.2689 | 9.0417  |
| C | -13.884  | -11.2373 | 9.7933  |
| C | -13.5092 | -9.9826  | 10.5428 |
| C | -14.4228 | -9.0297  | 10.7516 |
| C | -15.7627 | -9.1714  | 10.2019 |
| C | -16.0558 | -10.2933 | 9.3165  |
| O | -17.3486 | -10.2088 | 8.8549  |
| C | -17.8139 | -9.0376  | 9.5723  |
| N | -16.7639 | -8.3722  | 10.4009 |
| C | -18.9506 | -9.4752  | 10.4987 |
| C | -15.4976 | -13.8556 | 6.0945  |
| C | -12.7282 | -13.7583 | 7.1613  |
| O | -13.1569 | -12.2253 | 9.8174  |
| O | -12.2503 | -9.8033  | 11.1029 |
| C | -11.1654 | -10.3273 | 10.3417 |
| H | -17.5902 | -11.487  | 6.6893  |
| H | -17.4506 | -12.0624 | 5.0499  |
| H | -18.7205 | -9.9736  | 5.1187  |
| H | -17.4268 | -9.1625  | 5.9922  |
| H | -17.3566 | -10.1485 | 3.1064  |
| H | -17.3311 | -8.4923  | 3.6733  |
| H | -15.3211 | -10.3992 | 6.4805  |
| H | -13.0743 | -11.6509 | 7.2708  |
| H | -11.7215 | -12.065  | 5.3446  |
| H | -12.9511 | -13.0368 | 4.5759  |
| H | -13.0923 | -10.073  | 5.2994  |
| H | -12.8744 | -10.7335 | 3.6814  |
| H | -16.577  | -12.6295 | 8.1758  |
| H | -15.1216 | -13.3682 | 8.6985  |
| H | -14.2062 | -8.1386  | 11.3268 |
| H | -18.5944 | -10.2119 | 11.2281 |
| H | -19.3686 | -8.628   | 11.0526 |
| H | -19.7545 | -9.9571  | 9.9314  |
| H | -15.2254 | -14.6944 | 6.746   |
| H | -15.0891 | -14.0842 | 5.1108  |
| H | -16.589  | -13.8766 | 6.0221  |
| H | -11.6536 | -13.5901 | 7.2963  |
| H | -13.1287 | -14.0811 | 8.124   |
| H | -12.8391 | -14.5916 | 6.459   |
| H | -10.2607 | -9.7882  | 10.6392 |
| H | -11.0083 | -11.384  | 10.5748 |
| H | -11.3069 | -10.1759 | 9.266   |
| H | -13.6693 | -8.4891  | 3.677   |
| H | -15.228  | -7.5789  | 3.3349  |
| C | -14.9076 | -10.9475 | 4.4586  |
| C | -15.2318 | -11.9566 | 3.3278  |
| H | -14.7459 | -12.9233 | 3.4558  |
| H | -16.3015 | -12.1545 | 3.2201  |
| H | -14.8824 | -11.5729 | 2.3601  |
| C | -18.323  | -8.02    | 8.5515  |
| H | -18.7403 | -7.1332  | 9.0402  |
| H | -17.5081 | -7.6883  | 7.8982  |
| H | -19.0907 | -8.4608  | 7.9062  |

**Compound 3\_3**

Charge = 0 Multiplicity = 1

Symbolic Z-Matrix:

|   |          |          |         |
|---|----------|----------|---------|
| C | -15.9082 | -9.6319  | 4.7     |
| C | -14.836  | -8.6516  | 4.223   |
| C | -13.7473 | -9.3391  | 3.4081  |
| C | -13.192  | -10.5566 | 4.1236  |
| C | -15.2792 | -10.7949 | 5.5111  |
| C | -16.3312 | -11.6485 | 6.3412  |
| C | -15.6215 | -12.8873 | 7.0119  |
| C | -14.6665 | -13.6409 | 6.0783  |
| C | -13.6283 | -12.7153 | 5.4611  |
| C | -11.8618 | -10.6668 | 4.294   |
| C | -17.0098 | -10.7503 | 7.4729  |
| C | -16.1325 | -10.1509 | 8.5578  |
| C | -15.6061 | -8.759   | 8.379   |
| C | -14.6599 | -8.199   | 9.4177  |
| C | -14.4072 | -8.8869  | 10.5362 |
| C | -15.0424 | -10.1749 | 10.7692 |
| C | -15.8944 | -10.744  | 9.7337  |
| O | -16.3836 | -11.9645 | 10.1352 |
| C | -15.7716 | -12.0831 | 11.4424 |
| N | -14.9205 | -10.9161 | 11.8261 |
| C | -14.8924 | -13.3348 | 11.4344 |
| C | -17.5032 | -12.1228 | 5.4431  |
| C | -16.5813 | -13.9201 | 7.6278  |
| O | -15.9643 | -8.0897  | 7.4156  |
| O | -14.0032 | -6.9835  | 9.2621  |
| C | -14.7064 | -5.9651  | 8.5589  |
| H | -16.6387 | -9.0756  | 5.29    |
| H | -16.4604 | -10.0092 | 3.8333  |
| H | -15.3023 | -7.8638  | 3.6199  |
| H | -14.3832 | -8.1564  | 5.0912  |
| H | -14.1491 | -9.6419  | 2.4342  |
| H | -12.9576 | -8.6085  | 3.1934  |
| H | -14.6516 | -10.319  | 6.2799  |
| H | -14.9915 | -12.5097 | 7.8259  |
| H | -14.1354 | -14.411  | 6.6536  |
| H | -15.2223 | -14.1821 | 5.3061  |
| H | -13.0287 | -12.2891 | 6.277   |
| H | -12.9438 | -13.3204 | 4.8523  |
| H | -17.5883 | -9.9463  | 7.0016  |
| H | -17.7877 | -11.347  | 7.9687  |
| H | -13.735  | -8.5158  | 11.2995 |
| H | -14.0987 | -13.2451 | 10.6836 |
| H | -14.4192 | -13.5018 | 12.4077 |
| H | -15.4769 | -14.2227 | 11.1689 |
| H | -18.3003 | -12.5828 | 6.0385  |
| H | -17.1971 | -12.8667 | 4.7083  |
| H | -17.9726 | -11.2912 | 4.9089  |
| H | -16.0214 | -14.6417 | 8.2337  |
| H | -17.3296 | -13.4645 | 8.2787  |
| H | -17.111  | -14.4885 | 6.8558  |
| H | -14.2417 | -5.0071  | 8.8119  |
| H | -14.6027 | -6.1019  | 7.4788  |
| H | -15.758  | -5.9138  | 8.8602  |
| H | -11.3968 | -11.51   | 4.7915  |
| H | -11.1814 | -9.9032  | 3.9269  |
| C | -14.2507 | -11.5832 | 4.6107  |
| C | -14.8483 | -12.2194 | 3.3299  |
| H | -15.5226 | -13.0507 | 3.5331  |
| H | -15.4035 | -11.5087 | 2.7121  |
| H | -14.0492 | -12.6279 | 2.6973  |
| C | -16.8903 | -12.22   | 12.4757 |
| H | -16.4915 | -12.3465 | 13.4877 |
| H | -17.5295 | -11.3295 | 12.4738 |
| H | -17.5375 | -13.0727 | 12.2424 |

**Compound 3\_4**

Charge = 0 Multiplicity = 1

Symbolic Z-Matrix:

|   |          |          |         |
|---|----------|----------|---------|
| C | -17.1098 | -11.3288 | 5.7118  |
| C | -17.647  | -10.0034 | 5.1722  |
| C | -17.0214 | -9.6212  | 3.8379  |
| C | -15.5079 | -9.6796  | 3.9026  |
| C | -15.5629 | -11.3069 | 5.8264  |
| C | -14.9584 | -12.5115 | 6.6702  |
| C | -13.3841 | -12.4733 | 6.6236  |
| C | -12.8027 | -12.2148 | 5.2275  |
| C | -13.3823 | -10.9621 | 4.5877  |
| C | -14.7927 | -8.6018  | 3.5318  |
| C | -15.4567 | -12.4322 | 8.1842  |
| C | -15.1443 | -11.2012 | 9.0179  |
| C | -13.8485 | -11.1553 | 9.7736  |
| C | -13.4957 | -9.9019  | 10.5404 |
| C | -14.398  | -8.9265  | 10.6837 |
| C | -15.7278 | -9.0697  | 10.1125 |
| C | -16.0177 | -10.2142 | 9.2566  |
| O | -17.3057 | -10.1361 | 8.7803  |
| C | -17.7697 | -8.9388  | 9.4543  |
| N | -16.7253 | -8.2581  | 10.2769 |
| C | -18.9226 | -9.3379  | 10.3782 |
| C | -15.4746 | -13.879  | 6.1495  |
| C | -12.6976 | -13.7335 | 7.1803  |
| O | -13.106  | -12.1319 | 9.7789  |
| O | -12.2427 | -9.6982  | 11.1065 |
| C | -11.6244 | -10.8436 | 11.6842 |
| H | -17.5806 | -11.5116 | 6.6795  |
| H | -17.4454 | -12.1413 | 5.0596  |
| H | -18.736  | -10.0647 | 5.0644  |
| H | -17.4455 | -9.2112  | 5.9012  |
| H | -17.3818 | -10.293  | 3.0505  |
| H | -17.3707 | -8.6186  | 3.5615  |
| H | -15.3231 | -10.4112 | 6.4208  |
| H | -13.0558 | -11.6249 | 7.2351  |
| H | -11.7158 | -12.0814 | 5.3113  |
| H | -12.9413 | -13.0868 | 4.5806  |
| H | -13.1058 | -10.1041 | 5.2156  |
| H | -12.8922 | -10.8114 | 3.6169  |
| H | -16.5436 | -12.5876 | 8.1988  |
| H | -15.0831 | -13.3087 | 8.7297  |
| H | -14.1832 | -8.0193  | 11.234  |
| H | -18.5827 | -10.0549 | 11.1345 |
| H | -19.3402 | -8.4705  | 10.9001 |
| H | -19.7232 | -9.8301  | 9.815   |
| H | -15.1887 | -14.6947 | 6.8239  |
| H | -15.0759 | -14.1357 | 5.1687  |
| H | -16.5666 | -13.9106 | 6.0909  |
| H | -11.6236 | -13.5544 | 7.3051  |
| H | -13.0912 | -14.0353 | 8.1526  |
| H | -12.8061 | -14.585  | 6.4997  |
| H | -10.8744 | -10.49   | 12.3985 |
| H | -12.3418 | -11.4624 | 12.2337 |
| H | -11.0989 | -11.4225 | 10.9196 |
| H | -13.709  | -8.5766  | 3.5492  |
| H | -15.2786 | -7.6939  | 3.1848  |
| C | -14.9178 | -11.0213 | 4.4143  |
| C | -15.2396 | -12.0702 | 3.3194  |
| H | -14.7439 | -13.0277 | 3.4757  |
| H | -16.3081 | -12.2816 | 3.2255  |
| H | -14.9001 | -11.7154 | 2.3373  |
| C | -18.2562 | -7.9477  | 8.3971  |
| H | -18.6658 | -7.0404  | 8.8536  |
| H | -17.4314 | -7.6479  | 7.7407  |
| H | -19.0247 | -8.3985  | 7.7598  |

**Compound 3\_5**

Charge = 0 Multiplicity = 1

Symbolic Z-Matrix:

|   |          |          |         |
|---|----------|----------|---------|
| C | -16.0009 | -9.7057  | 4.6502  |
| C | -14.9653 | -8.6944  | 4.158   |
| C | -13.8544 | -9.3536  | 3.3498  |
| C | -13.254  | -10.5412 | 4.0795  |
| C | -15.329  | -10.8336 | 5.4759  |
| C | -16.348  | -11.7124 | 6.3205  |
| C | -15.5909 | -12.9123 | 7.0098  |
| C | -14.6125 | -13.6462 | 6.0847  |
| C | -13.6099 | -12.6939 | 5.4495  |
| C | -11.92   | -10.6027 | 4.2453  |
| C | -17.0591 | -10.8222 | 7.438   |
| C | -16.2031 | -10.1649 | 8.5047  |
| C | -15.7508 | -8.7534  | 8.3035  |
| C | -14.8166 | -8.1236  | 9.3103  |
| C | -14.5257 | -8.772   | 10.4483 |
| C | -15.095  | -10.0893 | 10.704  |
| C | -15.9237 | -10.7229 | 9.6881  |
| O | -16.3441 | -11.9594 | 10.1171 |
| C | -15.7172 | -12.0195 | 11.421  |
| N | -14.924  | -10.8022 | 11.774  |
| C | -14.7746 | -13.2241 | 11.4308 |
| C | -17.5019 | -12.2454 | 5.4321  |
| C | -16.5096 | -13.9685 | 7.6481  |
| O | -16.1525 | -8.1     | 7.3449  |
| O | -14.3425 | -6.8712  | 8.9632  |
| C | -13.4695 | -6.2029  | 9.8635  |
| H | -16.7498 | -9.1679  | 5.2343  |
| H | -16.5407 | -10.1146 | 3.7901  |
| H | -15.4604 | -7.9318  | 3.5456  |
| H | -14.529  | -8.172   | 5.0187  |
| H | -14.2473 | -9.6836  | 2.3811  |
| H | -13.0918 | -8.5982  | 3.1233  |
| H | -14.7177 | -10.324  | 6.2365  |
| H | -14.9719 | -12.4975 | 7.814   |
| H | -14.0525 | -14.3877 | 6.67    |
| H | -15.151  | -14.2189 | 5.323   |
| H | -13.0231 | -12.2344 | 6.2566  |
| H | -12.9063 | -13.2837 | 4.8474  |
| H | -17.6734 | -10.0531 | 6.9538  |
| H | -17.8084 | -11.4411 | 7.9501  |
| H | -13.8812 | -8.3812  | 11.2231 |
| H | -13.9921 | -13.1089 | 10.6717 |
| H | -14.2862 | -13.3465 | 12.4032 |
| H | -15.3144 | -14.1462 | 11.188  |
| H | -18.2816 | -12.7231 | 6.0368  |
| H | -17.1693 | -12.9914 | 4.7111  |
| H | -18.0012 | -11.4415 | 4.883   |
| H | -15.9206 | -14.6603 | 8.2612  |
| H | -17.269  | -13.5293 | 8.2977  |
| H | -17.0239 | -14.5671 | 6.8888  |
| H | -13.2011 | -5.2394  | 9.4203  |
| H | -13.967  | -6.0074  | 10.8189 |
| H | -12.5474 | -6.7743  | 10.0117 |
| H | -11.424  | -11.4226 | 4.7514  |
| H | -11.2687 | -9.8206  | 3.8646  |
| C | -14.2745 | -11.5974 | 4.5844  |
| C | -14.8514 | -12.2733 | 3.3146  |
| H | -15.494  | -13.1259 | 3.5316  |
| H | -15.4339 | -11.5922 | 2.6885  |
| H | -14.0394 | -12.661  | 2.6853  |
| C | -16.8195 | -12.1924 | 12.4666 |
| H | -16.4069 | -12.2773 | 13.4774 |
| H | -17.5037 | -11.3361 | 12.4522 |
| H | -17.4236 | -13.0818 | 12.2561 |

**Compound 3\_6**

Charge = 0 Multiplicity = 1

Symbolic Z-Matrix:

|   |          |          |         |
|---|----------|----------|---------|
| C | -17.1157 | -11.1506 | 5.6444  |
| C | -17.4829 | -9.7656  | 5.112   |
| C | -16.7777 | -9.4395  | 3.8026  |
| C | -15.283  | -9.67    | 3.9095  |
| C | -15.5804 | -11.3057 | 5.8038  |
| C | -15.142  | -12.5818 | 6.6451  |
| C | -13.5725 | -12.7193 | 6.6467  |
| C | -12.9228 | -12.5117 | 5.2724  |
| C | -13.3377 | -11.1939 | 4.6352  |
| C | -14.4396 | -8.676   | 3.5761  |
| C | -15.6759 | -12.467  | 8.144   |
| C | -15.2554 | -11.2882 | 9.0036  |
| C | -13.9887 | -11.3924 | 9.7957  |
| C | -13.5032 | -10.1969 | 10.5801 |
| C | -14.3034 | -9.1313  | 10.7308 |
| C | -15.6261 | -9.1231  | 10.1194 |
| C | -16.0191 | -10.2135 | 9.2359  |
| O | -17.2762 | -9.9835  | 8.7277  |
| C | -17.6214 | -8.7523  | 9.4111  |
| N | -16.5294 | -8.2052  | 10.2722 |
| C | -18.8363 | -9.0328  | 10.2984 |
| C | -15.7907 | -13.8757 | 6.0863  |
| C | -13.0486 | -14.0543 | 7.2056  |
| O | -13.3569 | -12.4448 | 9.8285  |
| O | -12.237  | -10.3267 | 11.1214 |
| C | -11.7204 | -9.2567  | 11.9012 |
| H | -17.6335 | -11.2916 | 6.5948  |
| H | -17.5209 | -11.911  | 4.9693  |
| H | -18.568  | -9.7015  | 4.9718  |
| H | -17.2155 | -9.0111  | 5.8597  |
| H | -17.1876 | -10.0558 | 2.9943  |
| H | -17.0028 | -8.4003  | 3.5328  |
| H | -15.2595 | -10.4507 | 6.4193  |
| H | -13.171  | -11.9201 | 7.2804  |
| H | -11.8309 | -12.503  | 5.39    |
| H | -13.1387 | -13.3548 | 4.6084  |
| H | -12.9856 | -10.3803 | 5.284   |
| H | -12.8041 | -11.088  | 3.6815  |
| H | -16.7732 | -12.501  | 8.124   |
| H | -15.4181 | -13.3857 | 8.6871  |
| H | -14.043  | -8.25    | 11.2998 |
| H | -18.5996 | -9.7945  | 11.0503 |
| H | -19.1681 | -8.1317  | 10.8249 |
| H | -19.6716 | -9.4234  | 9.7066  |
| H | -15.6202 | -14.7269 | 6.756   |
| H | -15.3913 | -14.1634 | 5.1145  |
| H | -16.8768 | -13.7834 | 5.9931  |
| H | -11.9653 | -13.999  | 7.3621  |
| H | -13.5012 | -14.3186 | 8.163   |
| H | -13.2329 | -14.8815 | 6.5116  |
| H | -10.7186 | -9.5385  | 12.2385 |
| H | -11.6304 | -8.3442  | 11.3031 |
| H | -12.3387 | -9.0846  | 12.7881 |
| H | -13.3612 | -8.7748  | 3.624   |
| H | -14.8091 | -7.7147  | 3.2294  |
| C | -14.864  | -11.0766 | 4.4161  |
| C | -15.2681 | -12.068  | 3.2952  |
| H | -14.888  | -13.0772 | 3.4499  |
| H | -16.3502 | -12.1563 | 3.1673  |
| H | -14.8613 | -11.7408 | 2.3293  |
| C | -17.9647 | -7.6974  | 8.3595  |
| H | -18.2829 | -6.7567  | 8.8213  |
| H | -17.0938 | -7.4824  | 7.73    |
| H | -18.7607 | -8.0498  | 7.6945  |



### Compound 4\_1

Charge = 0 Multiplicity = 1

Symbolic Z-Matrix:

|   |          |         |         |
|---|----------|---------|---------|
| C | -17.1985 | 1.8211  | 6.8506  |
| C | -17.8059 | 0.9219  | 7.9277  |
| C | -17.6237 | 1.459   | 9.3362  |
| C | -18.0297 | 2.9132  | 9.4395  |
| C | -17.3573 | 3.8595  | 8.4265  |
| C | -17.5447 | 3.3368  | 6.9483  |
| C | -18.8872 | 3.7565  | 6.1794  |
| C | -19.2349 | 5.2654  | 6.4639  |
| C | -19.1778 | 5.6122  | 7.9542  |
| C | -17.7986 | 5.3405  | 8.5218  |
| C | -18.8937 | 3.2758  | 10.4051 |
| C | -18.7168 | 3.5297  | 4.6114  |
| C | -17.5936 | 4.2513  | 3.8909  |
| C | -17.862  | 5.5986  | 3.2954  |
| C | -16.7141 | 6.3607  | 2.6768  |
| C | -15.5284 | 5.7685  | 2.5008  |
| C | -15.3172 | 4.4017  | 2.9541  |
| C | -16.3963 | 3.7063  | 3.6439  |
| O | -15.9943 | 2.4435  | 4.0097  |
| C | -14.6358 | 2.4376  | 3.5072  |
| N | -14.2289 | 3.7074  | 2.8322  |
| C | -14.5116 | 1.2967  | 2.4967  |
| C | -20.0823 | 2.8651  | 6.5983  |
| C | -20.6045 | 5.7353  | 5.9406  |
| O | -18.9994 | 6.0583  | 3.2935  |
| O | -16.8555 | 7.6638  | 2.2145  |
| C | -17.694  | 8.504   | 3.0031  |
| H | -16.1071 | 1.718   | 6.91    |
| H | -17.4666 | 1.41    | 5.8745  |
| H | -18.8709 | 0.7585  | 7.7439  |
| H | -17.3441 | -0.0712 | 7.8612  |
| H | -18.2029 | 0.8319  | 10.0257 |
| H | -16.5783 | 1.3461  | 9.6448  |
| H | -16.7504 | 3.8481  | 6.3874  |
| H | -18.4741 | 5.8831  | 5.9709  |
| H | -19.3983 | 6.6791  | 8.0893  |
| H | -19.9518 | 5.0711  | 8.5069  |
| H | -17.0854 | 5.9705  | 7.971   |
| H | -17.7511 | 5.6973  | 9.5585  |
| H | -18.604  | 2.4542  | 4.422   |
| H | -19.6618 | 3.7638  | 4.1052  |
| H | -14.6958 | 6.2753  | 2.0298  |
| H | -13.4935 | 1.2172  | 2.1013  |
| H | -14.7898 | 0.339   | 2.9504  |
| H | -15.1908 | 1.4538  | 1.6508  |
| H | -21.012  | 3.1735  | 6.109   |
| H | -20.2587 | 2.8852  | 7.6759  |
| H | -19.935  | 1.8269  | 6.2883  |
| H | -21.4261 | 5.3552  | 6.5575  |
| H | -20.6618 | 6.8295  | 5.9716  |
| H | -20.7949 | 5.4309  | 4.9105  |
| H | -17.4023 | 9.5405  | 2.8079  |
| H | -18.739  | 8.3957  | 2.6999  |
| H | -17.5709 | 8.318   | 4.0756  |
| H | -19.2114 | 4.2992  | 10.5648 |
| H | -19.3132 | 2.5448  | 11.0911 |
| C | -15.836  | 3.8836  | 8.7736  |
| H | -15.2886 | 4.5591  | 8.1051  |
| H | -15.673  | 4.2352  | 9.7998  |
| H | -15.3559 | 2.905   | 8.6845  |
| C | -13.6999 | 2.2068  | 4.695   |
| H | -12.6517 | 2.1662  | 4.381   |
| H | -13.8018 | 3.0137  | 5.4302  |
| H | -13.9489 | 1.275   | 5.2149  |

## Compound 4\_2

Charge = 0 Multiplicity = 1

Symbolic Z-Matrix:

|   |          |        |         |
|---|----------|--------|---------|
| C | -17.1706 | 5.3832 | 8.2543  |
| C | -17.3622 | 5.0926 | 9.7432  |
| C | -18.8139 | 4.8865 | 10.1363 |
| C | -19.5083 | 3.903  | 9.2196  |
| C | -19.4148 | 4.2249 | 7.7155  |
| C | -17.9141 | 4.4332 | 7.2681  |
| C | -17.0778 | 3.1315 | 6.8559  |
| C | -17.966  | 2.158  | 5.9914  |
| C | -19.3387 | 1.9013 | 6.6184  |
| C | -20.1061 | 3.1982 | 6.7853  |
| C | -20.1724 | 2.8683 | 9.7663  |
| C | -15.78   | 3.5431 | 6.0283  |
| C | -15.9624 | 4.2792 | 4.7144  |
| C | -15.958  | 5.7768 | 4.7209  |
| C | -16.2603 | 6.5088 | 3.4354  |
| C | -16.3357 | 5.8398 | 2.2804  |
| C | -16.1851 | 4.3921 | 2.2609  |
| C | -16.0072 | 3.6784 | 3.5194  |
| O | -15.9119 | 2.3262 | 3.2922  |
| C | -16.0411 | 2.2854 | 1.8501  |
| N | -16.2157 | 3.6269 | 1.2146  |
| C | -17.2676 | 1.4347 | 1.5159  |
| C | -16.5516 | 2.3788 | 8.1027  |
| C | -17.3379 | 0.7859 | 5.6878  |
| O | -15.6936 | 6.39   | 5.7501  |
| O | -16.4075 | 7.89   | 3.3898  |
| C | -17.0826 | 8.467  | 4.5046  |
| H | -17.5206 | 6.407  | 8.0676  |
| H | -16.0973 | 5.4107 | 8.0518  |
| H | -16.7832 | 4.2165 | 10.0465 |
| H | -16.9498 | 5.9281 | 10.3225 |
| H | -18.8477 | 4.5523 | 11.181  |
| H | -19.3443 | 5.8452 | 10.1177 |
| H | -17.9955 | 4.9991 | 6.3301  |
| H | -18.1523 | 2.6428 | 5.025   |
| H | -19.9221 | 1.2415 | 5.963   |
| H | -19.2365 | 1.37   | 7.5694  |
| H | -20.2324 | 3.638  | 5.7855  |
| H | -21.1249 | 2.9807 | 7.1303  |
| H | -15.109  | 4.1306 | 6.6666  |
| H | -15.1903 | 2.6379 | 5.8305  |
| H | -16.5158 | 6.3383 | 1.3364  |
| H | -17.4087 | 1.3374 | 0.4344  |
| H | -17.1809 | 0.4334 | 1.9524  |
| H | -18.1754 | 1.8832 | 1.9363  |
| H | -16.0191 | 1.4615 | 7.8307  |
| H | -17.3539 | 2.0983 | 8.7886  |
| H | -15.8173 | 2.9765 | 8.6499  |
| H | -17.3413 | 0.1347 | 6.5685  |
| H | -17.9156 | 0.2736 | 4.9096  |
| H | -16.3099 | 0.8577 | 5.3302  |
| H | -17.91   | 7.8399 | 4.8545  |
| H | -16.3769 | 8.6773 | 5.3129  |
| H | -17.5024 | 9.4237 | 4.179   |
| H | -20.7194 | 2.1378 | 9.1827  |
| H | -20.2005 | 2.7214 | 10.8427 |
| C | -20.2057 | 5.5507 | 7.4886  |
| H | -20.2071 | 5.8339 | 6.429   |
| H | -21.252  | 5.4421 | 7.8     |
| H | -19.7897 | 6.4017 | 8.0352  |
| C | -14.7739 | 1.6466 | 1.2807  |
| H | -14.8226 | 1.5563 | 0.1905  |
| H | -13.892  | 2.2479 | 1.5304  |
| H | -14.6089 | 0.6523 | 1.7102  |

### Compound 4\_3

Charge = 0 Multiplicity = 1

Symbolic Z-Matrix:

|   |          |         |         |
|---|----------|---------|---------|
| C | -17.2474 | 1.7837  | 6.8148  |
| C | -17.8781 | 0.8617  | 7.8588  |
| C | -17.6756 | 1.3386  | 9.2861  |
| C | -18.0394 | 2.7985  | 9.4468  |
| C | -17.3431 | 3.7639  | 8.4682  |
| C | -17.5487 | 3.3043  | 6.9714  |
| C | -18.8794 | 3.792   | 6.2227  |
| C | -19.1869 | 5.2964  | 6.569   |
| C | -19.1152 | 5.5826  | 8.0714  |
| C | -17.742  | 5.2517  | 8.6219  |
| C | -18.8897 | 3.1481  | 10.4291 |
| C | -18.7171 | 3.6247  | 4.6459  |
| C | -17.5774 | 4.3419  | 3.9448  |
| C | -17.8156 | 5.7135  | 3.3901  |
| C | -16.6664 | 6.441   | 2.7298  |
| C | -15.4838 | 5.8374  | 2.5739  |
| C | -15.2958 | 4.4644  | 3.0167  |
| C | -16.3918 | 3.7769  | 3.6868  |
| O | -16.0172 | 2.4979  | 4.0247  |
| C | -14.6515 | 2.4807  | 3.5425  |
| N | -14.2187 | 3.7538  | 2.8905  |
| C | -14.5284 | 1.3525  | 2.5179  |
| C | -20.0978 | 2.9166  | 6.6077  |
| C | -20.5467 | 5.8212  | 6.0724  |
| O | -18.9299 | 6.2213  | 3.4624  |
| O | -16.7727 | 7.7567  | 2.2937  |
| C | -18.0103 | 8.1064  | 1.6812  |
| H | -16.1595 | 1.6466  | 6.8668  |
| H | -17.5299 | 1.4184  | 5.8246  |
| H | -18.948  | 0.7369  | 7.6734  |
| H | -17.4459 | -0.1411 | 7.7522  |
| H | -18.2702 | 0.7021  | 9.9536  |
| H | -16.6328 | 1.184   | 9.5853  |
| H | -16.741  | 3.8136  | 6.4284  |
| H | -18.4122 | 5.9133  | 6.0969  |
| H | -19.3063 | 6.649   | 8.2493  |
| H | -19.9017 | 5.0412  | 8.6058  |
| H | -17.0134 | 5.8822  | 8.0923  |
| H | -17.681  | 5.5671  | 9.6712  |
| H | -18.6342 | 2.5548  | 4.4137  |
| H | -19.657  | 3.9035  | 4.1528  |
| H | -14.6399 | 6.3352  | 2.1132  |
| H | -13.506  | 1.2646  | 2.1356  |
| H | -14.8258 | 0.3924  | 2.9541  |
| H | -15.1936 | 1.5306  | 1.665   |
| H | -21.0193 | 3.2687  | 6.1327  |
| H | -20.2727 | 2.8986  | 7.6856  |
| H | -19.9785 | 1.8881  | 6.2562  |
| H | -21.3746 | 5.4391  | 6.6795  |
| H | -20.5755 | 6.9145  | 6.1454  |
| H | -20.7505 | 5.5611  | 5.0326  |
| H | -17.8296 | 8.9766  | 1.0426  |
| H | -18.3964 | 7.3013  | 1.0468  |
| H | -18.7417 | 8.4034  | 2.438   |
| H | -19.1771 | 4.1734  | 10.6293 |
| H | -19.328  | 2.4037  | 11.0884 |
| C | -15.8208 | 3.7315  | 8.8103  |
| H | -15.2562 | 4.4169  | 8.1666  |
| H | -15.6453 | 4.0381  | 9.8489  |
| H | -15.3689 | 2.744   | 8.6815  |
| C | -13.7353 | 2.2208  | 4.7397  |
| H | -12.6834 | 2.1721  | 4.4396  |
| H | -13.8379 | 3.0176  | 5.4856  |
| H | -14.0025 | 1.2843  | 5.2417  |

### Compound 4\_4

Charge = 0 Multiplicity = 1

Symbolic Z-Matrix:

|   |          |         |         |
|---|----------|---------|---------|
| C | -17.1851 | 1.7947  | 6.8525  |
| C | -17.7608 | 0.8598  | 7.9166  |
| C | -17.5744 | 1.3711  | 9.3341  |
| C | -18.0115 | 2.8131  | 9.4727  |
| C | -17.3719 | 3.7957  | 8.4728  |
| C | -17.5634 | 3.3002  | 6.9857  |
| C | -18.9225 | 3.7059  | 6.239   |
| C | -19.3024 | 5.1994  | 6.5603  |
| C | -19.2367 | 5.5154  | 8.057   |
| C | -17.8455 | 5.2638  | 8.6041  |
| C | -18.8727 | 3.1358  | 10.4547 |
| C | -18.7633 | 3.5178  | 4.6647  |
| C | -17.6654 | 4.278   | 3.9445  |
| C | -17.9724 | 5.6243  | 3.3693  |
| C | -16.8692 | 6.4168  | 2.7067  |
| C | -15.6601 | 5.8627  | 2.5308  |
| C | -15.4058 | 4.5027  | 2.9892  |
| C | -16.456  | 3.77    | 3.6821  |
| O | -16.0127 | 2.5171  | 4.0334  |
| C | -14.6554 | 2.5608  | 3.5305  |
| N | -14.2948 | 3.8464  | 2.8576  |
| C | -14.4918 | 1.4279  | 2.5167  |
| C | -20.0924 | 2.7778  | 6.6497  |
| C | -20.6888 | 5.6473  | 6.0625  |
| O | -19.1123 | 6.078   | 3.4167  |
| O | -17.2255 | 7.6929  | 2.3087  |
| C | -16.252  | 8.4977  | 1.6575  |
| H | -16.0912 | 1.7147  | 6.8987  |
| H | -17.4547 | 1.3983  | 5.8707  |
| H | -18.824  | 0.6769  | 7.741   |
| H | -17.2782 | -0.1212 | 7.824   |
| H | -18.1314 | 0.7167  | 10.0165 |
| H | -16.5231 | 1.2753  | 9.6287  |
| H | -16.7866 | 3.8407  | 6.4279  |
| H | -18.5619 | 5.8452  | 6.0723  |
| H | -19.4803 | 6.5738  | 8.2175  |
| H | -19.9919 | 4.9447  | 8.606   |
| H | -17.1529 | 5.9214  | 8.0592  |
| H | -17.7946 | 5.5998  | 9.6475  |
| H | -18.6286 | 2.4494  | 4.4509  |
| H | -19.719  | 3.741   | 4.1738  |
| H | -14.8265 | 6.3605  | 2.0555  |
| H | -13.472  | 1.3858  | 2.12    |
| H | -14.7352 | 0.4596  | 2.968   |
| H | -15.1772 | 1.563   | 1.672   |
| H | -21.0339 | 3.0746  | 6.176   |
| H | -20.2585 | 2.7706  | 7.7291  |
| H | -19.9242 | 1.7503  | 6.3158  |
| H | -21.494  | 5.2336  | 6.6794  |
| H | -20.7723 | 6.7389  | 6.1191  |
| H | -20.8832 | 5.3616  | 5.0278  |
| H | -16.7143 | 9.4604  | 1.4202  |
| H | -15.3974 | 8.6872  | 2.315   |
| H | -15.9291 | 8.0382  | 0.7178  |
| H | -19.2117 | 4.1483  | 10.6388 |
| H | -19.2685 | 2.3815  | 11.1295 |
| C | -15.8479 | 3.8471  | 8.8043  |
| H | -15.3232 | 4.549   | 8.1447  |
| H | -15.6816 | 4.1806  | 9.8361  |
| H | -15.3468 | 2.8819  | 8.6892  |
| C | -13.7102 | 2.3605  | 4.7165  |
| H | -12.6616 | 2.3591  | 4.401   |
| H | -13.8405 | 3.1608  | 5.4544  |
| H | -13.9243 | 1.4186  | 5.2336  |

### Compound 4\_5

Charge = 0 Multiplicity = 1

Symbolic Z-Matrix:

|   |          |        |         |
|---|----------|--------|---------|
| C | -17.1704 | 5.2848 | 8.3632  |
| C | -17.337  | 4.9431 | 9.8442  |
| C | -18.7803 | 4.706  | 10.2504 |
| C | -19.4757 | 3.7439 | 9.3119  |
| C | -19.4076 | 4.1165 | 7.8179  |
| C | -17.9161 | 4.3586 | 7.3563  |
| C | -17.0702 | 3.0819 | 6.8902  |
| C | -17.9585 | 2.1243 | 6.0085  |
| C | -19.319  | 1.8307 | 6.6455  |
| C | -20.0995 | 3.1119 | 6.8643  |
| C | -20.1194 | 2.6837 | 9.8336  |
| C | -15.7897 | 3.5368 | 6.0581  |
| C | -15.9931 | 4.3113 | 4.7693  |
| C | -15.9861 | 5.8069 | 4.8182  |
| C | -16.2523 | 6.5915 | 3.5545  |
| C | -16.3687 | 5.9508 | 2.3814  |
| C | -16.2516 | 4.499  | 2.3267  |
| C | -16.0609 | 3.7465 | 3.5587  |
| O | -15.9816 | 2.4013 | 3.2892  |
| C | -16.1496 | 2.4038 | 1.851   |
| N | -16.3153 | 3.7664 | 1.2582  |
| C | -17.3998 | 1.5848 | 1.525   |
| C | -16.516  | 2.2966 | 8.1046  |
| C | -17.318  | 0.7699 | 5.6546  |
| O | -15.7514 | 6.3954 | 5.8701  |
| O | -16.3398 | 7.9614 | 3.7257  |
| C | -16.5674 | 8.7751 | 2.5829  |
| H | -17.5358 | 6.3096 | 8.2158  |
| H | -16.1005 | 5.3329 | 8.1467  |
| H | -16.7432 | 4.0649 | 10.1107 |
| H | -16.9266 | 5.7643 | 10.4451 |
| H | -18.7952 | 4.3377 | 11.284  |
| H | -19.3226 | 5.658  | 10.2704 |
| H | -18.017  | 4.9537 | 6.4383  |
| H | -18.1645 | 2.6363 | 5.0603  |
| H | -19.9035 | 1.1849 | 5.9774  |
| H | -19.197  | 1.2707 | 7.5776  |
| H | -20.2449 | 3.582  | 5.881   |
| H | -21.1107 | 2.8708 | 7.2159  |
| H | -15.1173 | 4.1118 | 6.7064  |
| H | -15.1915 | 2.6457 | 5.8244  |
| H | -16.5461 | 6.4424 | 1.4352  |
| H | -17.5704 | 1.5214 | 0.4453  |
| H | -17.3202 | 0.57   | 1.9303  |
| H | -18.288  | 2.0368 | 1.9816  |
| H | -15.9758 | 1.3957 | 7.7958  |
| H | -17.3044 | 1.9837 | 8.7925  |
| H | -15.7813 | 2.8861 | 8.6602  |
| H | -17.3032 | 0.0915 | 6.5144  |
| H | -17.899  | 0.2752 | 4.8675  |
| H | -16.2951 | 0.8652 | 5.2877  |
| H | -15.7477 | 8.6782 | 1.8637  |
| H | -17.5283 | 8.5351 | 2.1165  |
| H | -16.6043 | 9.8174 | 2.9131  |
| H | -20.6661 | 1.9661 | 9.234   |
| H | -20.1302 | 2.5017 | 10.9049 |
| C | -20.2186 | 5.4384 | 7.6462  |
| H | -20.2398 | 5.7556 | 6.5966  |
| H | -21.2585 | 5.3059 | 7.9694  |
| H | -19.8051 | 6.2765 | 8.2141  |
| C | -14.9094 | 1.7596 | 1.2304  |
| H | -14.988  | 1.7016 | 0.1398  |
| H | -14.0106 | 2.3379 | 1.4739  |
| H | -14.7516 | 0.7505 | 1.627   |

### Compound 6\_1

Charge = 0 Multiplicity = 1

Symbolic Z-Matrix:

|   |          |         |         |
|---|----------|---------|---------|
| C | -13.9046 | 6.0838  | 10.1889 |
| C | -14.0664 | 7.5487  | 9.7837  |
| C | -14.0188 | 8.5124  | 10.9595 |
| C | -12.8492 | 8.2369  | 11.8816 |
| C | -12.7278 | 6.784   | 12.3778 |
| C | -12.7293 | 5.779   | 11.1614 |
| C | -11.3187 | 5.5055  | 10.4479 |
| C | -10.2004 | 5.2794  | 11.531  |
| C | -10.1822 | 6.3971  | 12.5793 |
| C | -11.5146 | 6.4943  | 13.299  |
| C | -12.0395 | 9.2547  | 12.2257 |
| C | -11.4212 | 4.2352  | 9.5056  |
| C | -11.8395 | 2.9064  | 10.169  |
| C | -10.7901 | 1.8133  | 10.122  |
| C | -11.4274 | 0.4775  | 9.9718  |
| C | -10.9083 | 6.6714  | 9.514   |
| C | -8.7699  | 5.1309  | 10.9856 |
| O | -9.5879  | 1.9931  | 10.2461 |
| O | -10.8784 | -0.7683 | 10.0769 |
| C | -9.4989  | -0.8068 | 10.4235 |
| H | -14.8375 | 5.7708  | 10.6764 |
| H | -13.8522 | 5.4698  | 9.2865  |
| H | -13.3059 | 7.8376  | 9.0545  |
| H | -15.0252 | 7.6681  | 9.2637  |
| H | -13.9845 | 9.5368  | 10.5675 |
| H | -14.954  | 8.4475  | 11.5274 |
| H | -12.9984 | 4.8167  | 11.6148 |
| H | -10.4264 | 4.3463  | 12.0626 |
| H | -9.4063  | 6.1841  | 13.3261 |
| H | -9.9068  | 7.353   | 12.1233 |
| H | -11.6738 | 5.5375  | 13.8171 |
| H | -11.4446 | 7.2419  | 14.0993 |
| H | -12.1189 | 4.4901  | 8.704   |
| H | -10.4661 | 4.0972  | 8.9846  |
| H | -9.9229  | 6.5045  | 9.0666  |
| H | -10.8704 | 7.632   | 10.0301 |
| H | -11.5885 | 6.7614  | 8.6632  |
| H | -8.0975  | 4.7965  | 11.7843 |
| H | -8.6988  | 4.3975  | 10.1813 |
| H | -8.3741  | 6.0818  | 10.614  |
| H | -9.3195  | -0.3215 | 11.3883 |
| H | -9.2089  | -1.8575 | 10.5209 |
| H | -8.8844  | -0.3655 | 9.6325  |
| H | -11.1994 | 9.1419  | 12.9005 |
| H | -12.2004 | 10.2587 | 11.8425 |
| C | -13.9712 | 6.5117  | 13.2806 |
| H | -13.9535 | 5.4904  | 13.68   |
| H | -13.9919 | 7.198   | 14.1362 |
| H | -14.9233 | 6.6214  | 12.7541 |
| C | -12.7121 | 0.7145  | 9.6982  |
| C | -13.047  | 2.1676  | 9.5562  |
| C | -13.3351 | 2.4621  | 8.065   |
| O | -14.4352 | 2.8348  | 7.668   |
| O | -12.2472 | 2.2433  | 7.2783  |
| C | -12.4592 | 2.5006  | 5.885   |
| C | -11.1543 | 2.2469  | 5.1564  |
| O | -14.195  | 2.4138  | 10.3673 |
| H | -12.0235 | 3.0565  | 11.2391 |
| H | -13.4378 | -0.071  | 9.5361  |
| H | -13.2363 | 1.8305  | 5.501   |
| H | -12.766  | 3.543   | 5.7436  |
| H | -10.3628 | 2.8949  | 5.5474  |
| H | -10.8232 | 1.214   | 5.3071  |
| H | -11.2639 | 2.4303  | 4.084   |
| H | -14.9233 | 2.6498  | 9.7571  |

## Compound 6\_2

Charge = 0 Multiplicity = 1

Symbolic Z-Matrix:

|   |          |         |         |
|---|----------|---------|---------|
| C | -13.8569 | 6.0325  | 10.0822 |
| C | -13.9979 | 7.4882  | 9.6378  |
| C | -13.9773 | 8.4794  | 10.7913 |
| C | -12.8356 | 8.2194  | 11.7522 |
| C | -12.7372 | 6.7783  | 12.286  |
| C | -12.711  | 5.7445  | 11.0943 |
| C | -11.2829 | 5.4464  | 10.4275 |
| C | -10.1967 | 5.2399  | 11.5464 |
| C | -10.2006 | 6.3822  | 12.5678 |
| C | -11.5519 | 6.504   | 13.2474 |
| C | -12.0296 | 9.2407  | 12.0946 |
| C | -11.3672 | 4.1551  | 9.5132  |
| C | -11.8123 | 2.8441  | 10.1944 |
| C | -10.7692 | 1.7439  | 10.1957 |
| C | -11.4102 | 0.4092  | 10.0521 |
| C | -10.8394 | 6.5871  | 9.4776  |
| C | -8.7525  | 5.07    | 11.0448 |
| O | -9.5697  | 1.919   | 10.3488 |
| O | -10.8713 | -0.8375 | 10.1929 |
| C | -9.5038  | -0.8774 | 10.5837 |
| H | -14.805  | 5.7365  | 10.5506 |
| H | -13.7833 | 5.3971  | 9.1963  |
| H | -13.2155 | 7.7552  | 8.9236  |
| H | -14.941  | 7.6005  | 9.0884  |
| H | -13.9256 | 9.4939  | 10.3762 |
| H | -14.9284 | 8.4333  | 11.3341 |
| H | -12.9985 | 4.7946  | 11.5625 |
| H | -10.4432 | 4.3211  | 12.0935 |
| H | -9.4471  | 6.1829  | 13.341  |
| H | -9.9067  | 7.3253  | 12.0971 |
| H | -11.7315 | 5.5608  | 13.7835 |
| H | -11.4996 | 7.2701  | 14.0314 |
| H | -12.0417 | 4.3961  | 8.6885  |
| H | -10.3996 | 3.9999  | 9.0209  |
| H | -9.8429  | 6.4041  | 9.0622  |
| H | -10.8103 | 7.5597  | 9.9712  |
| H | -11.495  | 6.6599  | 8.6059  |
| H | -8.1047  | 4.7512  | 11.8697 |
| H | -8.664   | 4.317   | 10.2607 |
| H | -8.3406  | 6.0093  | 10.6616 |
| H | -9.3519  | -0.3757 | 11.5449 |
| H | -9.2235  | -1.9278 | 10.7091 |
| H | -8.8619  | -0.454  | 9.8048  |
| H | -11.2093 | 9.1394  | 12.7952 |
| H | -12.1734 | 10.2362 | 11.6833 |
| C | -14.007  | 6.5345  | 13.1598 |
| H | -14.0068 | 5.523   | 13.5836 |
| H | -14.0472 | 7.2411  | 13.998  |
| H | -14.9433 | 6.6369  | 12.6044 |
| C | -12.6861 | 0.6482  | 9.7416  |
| C | -13.0098 | 2.1002  | 9.5679  |
| C | -13.267  | 2.3743  | 8.0669  |
| O | -14.3522 | 2.7674  | 7.6491  |
| O | -12.1698 | 2.1216  | 7.3032  |
| C | -12.3151 | 2.3538  | 5.8942  |
| C | -12.022  | 3.8074  | 5.5731  |
| O | -14.1735 | 2.3646  | 10.3511 |
| H | -12.0209 | 3.0185  | 11.2563 |
| H | -13.4121 | -0.136  | 9.5748  |
| H | -11.5884 | 1.7104  | 5.3876  |
| H | -13.3098 | 2.0571  | 5.5426  |
| H | -12.74   | 4.4709  | 6.0654  |
| H | -11.0282 | 4.0887  | 5.9368  |
| H | -12.0669 | 3.9832  | 4.4947  |
| H | -14.8769 | 2.6327  | 9.7249  |

## Compound 6\_3

Charge = 0 Multiplicity = 1

Symbolic Z-Matrix:

|   |          |         |         |
|---|----------|---------|---------|
| C | -13.8422 | 6.1123  | 10.1277 |
| C | -13.9854 | 7.5847  | 9.7429  |
| C | -14.0073 | 8.525   | 10.9382 |
| C | -12.8906 | 8.2336  | 11.9191 |
| C | -12.7929 | 6.7715  | 12.3928 |
| C | -12.7228 | 5.7906  | 11.1589 |
| C | -11.2736 | 5.5339  | 10.5209 |
| C | -10.2178 | 5.288   | 11.6612 |
| C | -10.2615 | 6.3853  | 12.73   |
| C | -11.6326 | 6.4662  | 13.3752 |
| C | -12.1047 | 9.246   | 12.328  |
| C | -11.3188 | 4.2826  | 9.5492  |
| C | -11.7712 | 2.9406  | 10.1616 |
| C | -10.7217 | 1.8466  | 10.143  |
| C | -11.3521 | 0.5156  | 9.9323  |
| C | -10.8142 | 6.719   | 9.6353  |
| C | -8.7584  | 5.1509  | 11.1951 |
| O | -9.527   | 2.0213  | 10.3302 |
| O | -10.81   | -0.7332 | 10.037  |
| C | -9.451   | -0.7822 | 10.4556 |
| H | -14.8002 | 5.7877  | 10.5553 |
| H | -13.7368 | 5.5166  | 9.2177  |
| H | -13.1858 | 7.8894  | 9.0636  |
| H | -14.9137 | 7.7124  | 9.172   |
| H | -13.9543 | 9.557   | 10.5689 |
| H | -14.9728 | 8.4469  | 11.451  |
| H | -13.014  | 4.819   | 11.5774 |
| H | -10.4714 | 4.3447  | 12.1613 |
| H | -9.5284  | 6.1592  | 13.5152 |
| H | -9.9635  | 7.3503  | 12.3088 |
| H | -11.8181 | 5.4993  | 13.865  |
| H | -11.61   | 7.1982  | 14.1924 |
| H | -11.9695 | 4.552   | 8.7135  |
| H | -10.3349 | 4.1563  | 9.0817  |
| H | -9.8046  | 6.5627  | 9.2412  |
| H | -10.8083 | 7.6691  | 10.1717 |
| H | -11.4454 | 6.825   | 8.7492  |
| H | -8.1314  | 4.8041  | 12.0249 |
| H | -8.6403  | 4.431   | 10.3842 |
| H | -8.3446  | 6.1085  | 10.8624 |
| H | -9.3226  | -0.3179 | 11.4388 |
| H | -9.1678  | -1.8353 | 10.5459 |
| H | -8.7948  | -0.3255 | 9.708   |
| H | -11.3034 | 9.1216  | 13.0467 |
| H | -12.2467 | 10.2571 | 11.9561 |
| C | -14.0844 | 6.4789  | 13.2185 |
| H | -14.086  | 5.45    | 13.5983 |
| H | -14.1555 | 7.1482  | 14.0848 |
| H | -15.0057 | 6.597   | 12.6414 |
| C | -12.6215 | 0.7611  | 9.6011  |
| C | -12.9478 | 2.2177  | 9.4749  |
| C | -13.1651 | 2.5445  | 7.9783  |
| O | -14.2462 | 2.9278  | 7.5413  |
| O | -12.0428 | 2.3338  | 7.2387  |
| C | -12.1557 | 2.5974  | 5.8324  |
| C | -12.669  | 1.3652  | 5.1119  |
| O | -14.1335 | 2.4477  | 10.2353 |
| H | -12.0071 | 3.0679  | 11.2245 |
| H | -13.3391 | -0.0191 | 9.3861  |
| H | -12.7915 | 3.4693  | 5.6409  |
| H | -11.152  | 2.8448  | 5.4718  |
| H | -12.0228 | 0.5047  | 5.3142  |
| H | -13.6725 | 1.0977  | 5.4574  |
| H | -12.7047 | 1.534   | 4.0319  |
| H | -14.8306 | 2.701   | 9.5961  |



### Compound 6\_4

Charge = 0 Multiplicity = 1

Symbolic Z-Matrix:

|   |          |         |         |
|---|----------|---------|---------|
| C | -13.0928 | 6.1622  | 9.1612  |
| C | -12.9385 | 7.6383  | 8.7961  |
| C | -13.5042 | 8.5788  | 9.8456  |
| C | -13.0105 | 8.2307  | 11.2328 |
| C | -13.2357 | 6.7685  | 11.668  |
| C | -12.6485 | 5.759   | 10.5982 |
| C | -11.1061 | 5.3731  | 10.7336 |
| C | -10.7616 | 5.0962  | 12.2433 |
| C | -11.1969 | 6.2435  | 13.1577 |
| C | -12.7026 | 6.4265  | 13.0834 |
| C | -12.4533 | 9.1998  | 11.9819 |
| C | -10.7434 | 4.1034  | 9.8506  |
| C | -11.1608 | 2.6955  | 10.3226 |
| C | -10.386  | 1.5851  | 9.6351  |
| C | -11.2067 | 0.3478  | 9.5583  |
| C | -10.2007 | 6.5091  | 10.1897 |
| C | -9.288   | 4.7706  | 12.5333 |
| O | -9.2308  | 1.6745  | 9.2457  |
| O | -10.8428 | -0.923  | 9.2178  |
| C | -9.4621  | -1.1107 | 8.9292  |
| H | -14.1547 | 5.9074  | 9.0506  |
| H | -12.5816 | 5.5685  | 8.4012  |
| H | -11.8896 | 7.8885  | 8.6181  |
| H | -13.4469 | 7.8214  | 7.8412  |
| H | -13.2369 | 9.6073  | 9.5718  |
| H | -14.5994 | 8.5448  | 9.8248  |
| H | -13.1667 | 4.8161  | 10.8035 |
| H | -11.342  | 4.2224  | 12.565  |
| H | -10.9334 | 6.0063  | 14.1966 |
| H | -10.6639 | 7.1668  | 12.913  |
| H | -13.1635 | 5.4891  | 13.4274 |
| H | -13.0191 | 7.1794  | 13.8161 |
| H | -11.0545 | 4.2571  | 8.8143  |
| H | -9.6466  | 4.0882  | 9.7703  |
| H | -9.1392  | 6.3022  | 10.3602 |
| H | -10.4147 | 7.4765  | 10.6467 |
| H | -10.2991 | 6.6082  | 9.1047  |
| H | -9.1731  | 4.4468  | 13.5744 |
| H | -8.9114  | 3.959   | 11.906  |
| H | -8.6409  | 5.6425  | 12.3976 |
| H | -8.838   | -0.841  | 9.7873  |
| H | -9.3058  | -2.1745 | 8.7256  |
| H | -9.1712  | -0.5553 | 8.032   |
| H | -12.0949 | 9.039   | 12.9916 |
| H | -12.3417 | 10.2124 | 11.6035 |
| C | -14.7785 | 6.5613  | 11.7722 |
| H | -15.0187 | 5.542   | 12.098  |
| H | -15.219  | 7.2515  | 12.5022 |
| H | -15.3012 | 6.7137  | 10.8237 |
| C | -12.4441 | 0.7154  | 9.8985  |
| C | -12.6005 | 2.1899  | 10.1402 |
| C | -13.4031 | 2.7582  | 8.9478  |
| O | -14.5615 | 3.149   | 9.0625  |
| O | -12.7101 | 2.6974  | 7.7799  |
| C | -13.4429 | 3.1255  | 6.625   |
| C | -12.5031 | 3.0965  | 5.4361  |
| O | -13.3031 | 2.3275  | 11.3733 |
| H | -10.8748 | 2.5842  | 11.3759 |
| H | -13.2765 | 0.0253  | 9.9348  |
| H | -14.2823 | 2.4428  | 6.4535  |
| H | -13.8204 | 4.143   | 6.773   |
| H | -11.6471 | 3.7579  | 5.6064  |
| H | -12.1017 | 2.0887  | 5.2862  |
| H | -13.0175 | 3.4116  | 4.524   |
| H | -14.2338 | 2.5238  | 11.1429 |

### Compound 6\_5

Charge = 0 Multiplicity = 1

Symbolic Z-Matrix:

|   |          |         |         |
|---|----------|---------|---------|
| C | -13.5898 | 6.0067  | 9.715   |
| C | -13.6255 | 7.4672  | 9.2656  |
| C | -13.8089 | 8.4495  | 10.4115 |
| C | -12.866  | 8.1666  | 11.562  |
| C | -12.8877 | 6.7216  | 12.0946 |
| C | -12.66   | 5.6907  | 10.9217 |
| C | -11.1394 | 5.3618  | 10.5286 |
| C | -10.2725 | 5.1524  | 11.8247 |
| C | -10.4518 | 6.2946  | 12.8298 |
| C | -11.9023 | 6.4267  | 13.2542 |
| C | -12.1217 | 9.174   | 12.0529 |
| C | -11.0795 | 4.0577  | 9.6261  |
| C | -11.6545 | 2.7597  | 10.2354 |
| C | -10.6195 | 1.6743  | 10.4663 |
| C | -11.1827 | 0.3305  | 10.1781 |
| C | -10.5158 | 6.486   | 9.6643  |
| C | -8.7622  | 4.9773  | 11.5889 |
| O | -9.4917  | 1.8711  | 10.8942 |
| O | -10.6557 | -0.907  | 10.4143 |
| C | -9.3452  | -0.925  | 10.9675 |
| H | -14.6133 | 5.7195  | 9.9905  |
| H | -13.3539 | 5.3811  | 8.8521  |
| H | -12.7185 | 7.7275  | 8.7146  |
| H | -14.4463 | 7.5969  | 8.5491  |
| H | -13.6706 | 9.4664  | 10.0228 |
| H | -14.8442 | 8.4108  | 10.7691 |
| H | -13.05   | 4.746   | 11.3207 |
| H | -10.6174 | 4.2356  | 12.3192 |
| H | -9.8517  | 6.0894  | 13.7259 |
| H | -10.0701 | 7.2349  | 12.4203 |
| H | -12.1867 | 5.4825  | 13.7406 |
| H | -11.9859 | 7.1876  | 14.0406 |
| H | -11.5904 | 4.2948  | 8.6905  |
| H | -10.0416 | 3.8845  | 9.3167  |
| H | -9.4646  | 6.2846  | 9.433   |
| H | -10.5596 | 7.4624  | 10.1499 |
| H | -11.0058 | 6.5602  | 8.6899  |
| H | -8.2752  | 4.644   | 12.5128 |
| H | -8.5368  | 4.2346  | 10.8225 |
| H | -8.2835  | 5.9185  | 11.2987 |
| H | -9.3285  | -0.4536 | 11.9554 |
| H | -9.0513  | -1.9714 | 11.0946 |
| H | -8.6248  | -0.4582 | 10.2881 |
| H | -11.445  | 9.0578  | 12.8912 |
| H | -12.1733 | 10.1735 | 11.6296 |
| C | -14.2994 | 6.4939  | 12.7193 |
| H | -14.3897 | 5.4825  | 13.1338 |
| H | -14.4848 | 7.201   | 13.5372 |
| H | -15.1158 | 6.6074  | 12.0007 |
| C | -12.3751 | 0.5471  | 9.6208  |
| C | -12.7044 | 1.9913  | 9.4024  |
| C | -12.6376 | 2.2666  | 7.8763  |
| O | -11.7474 | 1.8987  | 7.1222  |
| O | -13.7078 | 3.0374  | 7.5074  |
| C | -13.724  | 3.3914  | 6.1185  |
| C | -14.925  | 4.2841  | 5.8753  |
| O | -13.9953 | 2.2004  | 9.9668  |
| H | -12.0701 | 2.9542  | 11.2307 |
| H | -13.0299 | -0.2523 | 9.3007  |
| H | -12.8054 | 3.9311  | 5.8622  |
| H | -13.804  | 2.4845  | 5.5091  |
| H | -15.8509 | 3.7678  | 6.1492  |
| H | -14.8675 | 5.1847  | 6.4957  |
| H | -14.9836 | 4.582   | 4.8247  |
| H | -14.4045 | 2.9263  | 9.4579  |

## Compound 6\_6

Charge = 0 Multiplicity = 1

Symbolic Z-Matrix:

|   |          |         |         |
|---|----------|---------|---------|
| C | -13.927  | 6.0312  | 10.2051 |
| C | -14.1592 | 7.4847  | 9.7928  |
| C | -14.1445 | 8.4569  | 10.9624 |
| C | -12.9543 | 8.2408  | 11.8737 |
| C | -12.7617 | 6.7985  | 12.3778 |
| C | -12.73   | 5.7859  | 11.168  |
| C | -11.3158 | 5.5708  | 10.442  |
| C | -10.1774 | 5.4041  | 11.5151 |
| C | -10.1993 | 6.5295  | 12.5549 |
| C | -11.5272 | 6.5709  | 13.2881 |
| C | -12.1882 | 9.2967  | 12.2025 |
| C | -11.3699 | 4.2894  | 9.5106  |
| C | -11.7213 | 2.949   | 10.1899 |
| C | -10.6247 | 1.9064  | 10.1304 |
| C | -11.1923 | 0.5411  | 9.9867  |
| C | -10.9681 | 6.7466  | 9.4952  |
| C | -8.7471  | 5.3159  | 10.9559 |
| O | -9.429   | 2.1316  | 10.2425 |
| O | -10.4332 | -0.579  | 10.1197 |
| C | -11.1165 | -1.8172 | 9.9767  |
| H | -14.8401 | 5.6789  | 10.7032 |
| H | -13.8546 | 5.4151  | 9.3057  |
| H | -13.4194 | 7.8032  | 9.0547  |
| H | -15.1272 | 7.557   | 9.2814  |
| H | -14.1613 | 9.4793  | 10.5641 |
| H | -15.0701 | 8.3527  | 11.5402 |
| H | -12.9513 | 4.8156  | 11.63   |
| H | -10.3553 | 4.466   | 12.056  |
| H | -9.4068  | 6.358   | 13.295  |
| H | -9.9727  | 7.4934  | 12.0891 |
| H | -11.6373 | 5.6115  | 13.8142 |
| H | -11.4833 | 7.3265  | 14.0827 |
| H | -12.0845 | 4.5059  | 8.7128  |
| H | -10.4142 | 4.1902  | 8.9819  |
| H | -9.9809  | 6.6208  | 9.0385  |
| H | -10.9686 | 7.7119  | 10.0039 |
| H | -11.6606 | 6.7991  | 8.6511  |
| H | -8.052   | 5.0202  | 11.7505 |
| H | -8.6508  | 4.5787  | 10.1578 |
| H | -8.3991  | 6.2803  | 10.5716 |
| H | -11.5481 | -1.913  | 8.9747  |
| H | -10.3884 | -2.6228 | 10.1099 |
| H | -11.8898 | -1.9291 | 10.744  |
| H | -11.3366 | 9.2266  | 12.8688 |
| H | -12.3982 | 10.2898 | 11.8148 |
| C | -13.9822 | 6.4759  | 13.2951 |
| H | -13.9136 | 5.4595  | 13.7013 |
| H | -14.0259 | 7.1667  | 14.1462 |
| H | -14.9435 | 6.538   | 12.7777 |
| C | -12.4951 | 0.7101  | 9.7307  |
| C | -12.9004 | 2.1492  | 9.5996  |
| C | -13.2346 | 2.4422  | 8.1177  |
| O | -14.3368 | 2.8454  | 7.7582  |
| O | -12.1776 | 2.2043  | 7.2959  |
| C | -12.425  | 2.4796  | 5.9118  |
| C | -11.1502 | 2.1984  | 5.1413  |
| O | -14.0462 | 2.3269  | 10.4325 |
| H | -11.8962 | 3.0974  | 11.2616 |
| H | -13.2045 | -0.0904 | 9.5772  |
| H | -13.2309 | 1.8337  | 5.5464  |
| H | -12.7083 | 3.5309  | 5.7886  |
| H | -10.3302 | 2.8218  | 5.5129  |
| H | -10.8422 | 1.1559  | 5.2732  |
| H | -11.2877 | 2.3942  | 4.0742  |
| H | -14.718  | 2.7877  | 9.8896  |

### Compound 6\_7

Charge = 0 Multiplicity = 1

Symbolic Z-Matrix:

|   |          |         |         |
|---|----------|---------|---------|
| C | -13.7268 | 5.9897  | 9.8771  |
| C | -13.8001 | 7.4403  | 9.4013  |
| C | -13.8659 | 8.4488  | 10.538  |
| C | -12.8228 | 8.1827  | 11.6033 |
| C | -12.8002 | 6.7484  | 12.1631 |
| C | -12.6839 | 5.6966  | 10.9929 |
| C | -11.2061 | 5.362   | 10.4627 |
| C | -10.2274 | 5.1608  | 11.6769 |
| C | -10.3089 | 6.3155  | 12.681  |
| C | -11.714  | 6.4665  | 13.2326 |
| C | -12.0333 | 9.1949  | 12.0058 |
| C | -11.2286 | 4.054   | 9.5653  |
| C | -11.7569 | 2.7595  | 10.2196 |
| C | -10.7042 | 1.687   | 10.4277 |
| C | -11.2717 | 0.3335  | 10.1971 |
| C | -10.6609 | 6.4787  | 9.5373  |
| C | -8.7449  | 4.9768  | 11.3076 |
| O | -9.5597  | 1.8994  | 10.7998 |
| O | -10.73   | -0.8953 | 10.4453 |
| C | -9.397   | -0.8934 | 10.9422 |
| H | -14.7192 | 5.7164  | 10.2597 |
| H | -13.5825 | 5.34    | 9.0117  |
| H | -12.9514 | 7.6828  | 8.7575  |
| H | -14.6871 | 7.5599  | 8.7665  |
| H | -13.7567 | 9.4557  | 10.1154 |
| H | -14.8636 | 8.4283  | 10.9915 |
| H | -13.0322 | 4.7603  | 11.4458 |
| H | -10.5327 | 4.2506  | 12.2089 |
| H | -9.6323  | 6.1155  | 13.5221 |
| H | -9.9588  | 7.2483  | 12.2283 |
| H | -11.9581 | 5.5328  | 13.7597 |
| H | -11.7209 | 7.2414  | 14.0096 |
| H | -11.8217 | 4.2929  | 8.68    |
| H | -10.2234 | 3.8735  | 9.1654  |
| H | -9.6347  | 6.2733  | 9.215   |
| H | -10.6593 | 7.4592  | 10.0161 |
| H | -11.2353 | 6.546   | 8.6097  |
| H | -8.1789  | 4.6453  | 12.186  |
| H | -8.5917  | 4.2302  | 10.5272 |
| H | -8.2899  | 5.9143  | 10.971  |
| H | -9.3405  | -0.3951 | 11.9152 |
| H | -9.093   | -1.9349 | 11.085  |
| H | -8.7084  | -0.4428 | 10.2202 |
| H | -11.2834 | 9.0899  | 12.7809 |
| H | -12.1197 | 10.1868 | 11.5704 |
| C | -14.1492 | 6.5401  | 12.9195 |
| H | -14.2071 | 5.5351  | 13.3549 |
| H | -14.2528 | 7.2596  | 13.7411 |
| H | -15.0286 | 6.6508  | 12.2791 |
| C | -12.4856 | 0.531   | 9.6803  |
| C | -12.8268 | 1.9683  | 9.4346  |
| C | -12.7956 | 2.2037  | 7.8993  |
| O | -11.9101 | 1.8327  | 7.1413  |
| O | -13.8903 | 2.9398  | 7.5301  |
| C | -13.9895 | 3.2459  | 6.1302  |
| C | -13.2295 | 4.5213  | 5.8176  |
| O | -14.1022 | 2.1893  | 10.0275 |
| H | -12.1378 | 2.9645  | 11.2262 |
| H | -13.1487 | -0.2784 | 9.4061  |
| H | -13.6413 | 2.4092  | 5.5139  |
| H | -15.0525 | 3.3875  | 5.9092  |
| H | -13.595  | 5.3484  | 6.4348  |
| H | -12.1632 | 4.4079  | 6.0366  |
| H | -13.3428 | 4.7915  | 4.764   |
| H | -14.5303 | 2.8947  | 9.5058  |

### Compound 6\_8

Charge = 0 Multiplicity = 1

Symbolic Z-Matrix:

|   |          |         |         |
|---|----------|---------|---------|
| C | -13.8873 | 5.9874  | 10.1105 |
| C | -14.0982 | 7.4328  | 9.6601  |
| C | -14.1017 | 8.4314  | 10.8073 |
| C | -12.934  | 8.2271  | 11.75   |
| C | -12.7644 | 6.7952  | 12.2908 |
| C | -12.7139 | 5.7551  | 11.1053 |
| C | -11.2855 | 5.513   | 10.4164 |
| C | -10.1724 | 5.3627  | 11.5177 |
| C | -10.2088 | 6.5112  | 12.5314 |
| C | -11.5524 | 6.5789  | 13.2335 |
| C | -12.167  | 9.2843  | 12.0722 |
| C | -11.3295 | 4.2114  | 9.5137  |
| C | -11.7051 | 2.8885  | 10.2134 |
| C | -10.6119 | 1.8407  | 10.2068 |
| C | -11.1806 | 0.4747  | 10.0749 |
| C | -10.9081 | 6.6638  | 9.4503  |
| C | -8.731   | 5.2527  | 10.9921 |
| O | -9.4188  | 2.0637  | 10.3481 |
| O | -10.4301 | -0.6451 | 10.2522 |
| C | -11.1145 | -1.8836 | 10.1177 |
| H | -14.8141 | 5.6539  | 10.5961 |
| H | -13.8005 | 5.3503  | 9.2272  |
| H | -13.3396 | 7.7286  | 8.9317  |
| H | -15.054  | 7.5008  | 9.1255  |
| H | -14.101  | 9.4445  | 10.3855 |
| H | -15.0407 | 8.3476  | 11.3663 |
| H | -12.9532 | 4.7972  | 11.5839 |
| H | -10.3691 | 4.4381  | 12.0751 |
| H | -9.4343  | 6.3507  | 13.2926 |
| H | -9.9645  | 7.4628  | 12.0493 |
| H | -11.6818 | 5.6324  | 13.7782 |
| H | -11.5202 | 7.3518  | 14.0118 |
| H | -12.0275 | 4.4159  | 8.699   |
| H | -10.3647 | 4.094   | 9.0058  |
| H | -9.9119  | 6.5205  | 9.0189  |
| H | -10.9126 | 7.6408  | 9.9362  |
| H | -11.5811 | 6.7012  | 8.5898  |
| H | -8.0558  | 4.9679  | 11.8075 |
| H | -8.6229  | 4.4991  | 10.2109 |
| H | -8.3672  | 6.2066  | 10.5963 |
| H | -11.5192 | -1.9997 | 9.1068  |
| H | -10.3938 | -2.6888 | 10.2882 |
| H | -11.9088 | -1.9758 | 10.866  |
| H | -11.3312 | 9.2231  | 12.7591 |
| H | -12.3603 | 10.27   | 11.6575 |
| C | -14.0076 | 6.503   | 13.1876 |
| H | -13.9564 | 5.4955  | 13.6179 |
| H | -14.0645 | 7.2132  | 14.0217 |
| H | -14.9566 | 6.5607  | 12.6475 |
| C | -12.475  | 0.6428  | 9.779   |
| C | -12.8712 | 2.0801  | 9.6086  |
| C | -13.1683 | 2.3465  | 8.1133  |
| O | -14.2579 | 2.7559  | 7.7239  |
| O | -12.0939 | 2.0832  | 7.3218  |
| C | -12.2696 | 2.3229  | 5.9175  |
| C | -11.9682 | 3.7743  | 5.5945  |
| O | -14.0372 | 2.2779  | 10.4087 |
| H | -11.9085 | 3.0617  | 11.2764 |
| H | -13.1831 | -0.1583 | 9.6221  |
| H | -11.5622 | 1.6735  | 5.3915  |
| H | -13.2755 | 2.0385  | 5.5885  |
| H | -12.6692 | 4.4437  | 6.1032  |
| H | -10.9642 | 4.0444  | 5.9383  |
| H | -12.0337 | 3.9539  | 4.5177  |
| H | -14.6887 | 2.7409  | 9.8433  |

### Compound 6\_9

Charge = 0 Multiplicity = 1

Symbolic Z-Matrix:

|   |          |         |         |
|---|----------|---------|---------|
| C | -12.9844 | 6.2179  | 9.1448  |
| C | -12.8104 | 7.7024  | 8.8252  |
| C | -13.436  | 8.6175  | 9.8634  |
| C | -13.0235 | 8.2351  | 11.2681 |
| C | -13.2716 | 6.7626  | 11.6532 |
| C | -12.6216 | 5.78    | 10.5947 |
| C | -11.0886 | 5.3924  | 10.8096 |
| C | -10.8323 | 5.0768  | 12.3292 |
| C | -11.3222 | 6.2001  | 13.2458 |
| C | -12.8213 | 6.3852  | 13.0883 |
| C | -12.5124 | 9.1853  | 12.0722 |
| C | -10.6712 | 4.1466  | 9.9172  |
| C | -11.1124 | 2.7262  | 10.3259 |
| C | -10.297  | 1.636   | 9.653   |
| C | -11.1104 | 0.4023  | 9.4891  |
| C | -10.1558 | 6.5431  | 10.3492 |
| C | -9.3776  | 4.7443  | 12.6965 |
| O | -9.1206  | 1.736   | 9.3366  |
| O | -10.7256 | -0.8573 | 9.1305  |
| C | -9.3297  | -1.0379 | 8.9218  |
| H | -14.0386 | 5.9677  | 8.9688  |
| H | -12.4324 | 5.6416  | 8.3998  |
| H | -11.7532 | 7.9562  | 8.7135  |
| H | -13.2636 | 7.9091  | 7.8476  |
| H | -13.1538 | 9.652   | 9.6308  |
| H | -14.5281 | 8.5851  | 9.7784  |
| H | -13.1485 | 4.832   | 10.7475 |
| H | -11.4288 | 4.1947  | 12.5938 |
| H | -11.1196 | 5.9363  | 14.2918 |
| H | -10.7772 | 7.1295  | 13.0565 |
| H | -13.3001 | 5.4396  | 13.3814 |
| H | -13.1808 | 7.1197  | 13.8199 |
| H | -10.9203 | 4.3278  | 8.8686  |
| H | -9.5715  | 4.1344  | 9.9019  |
| H | -9.1057  | 6.3329  | 10.5764 |
| H | -10.3986 | 7.4982  | 10.8174 |
| H | -10.1907 | 6.6699  | 9.2632  |
| H | -9.323   | 4.3944  | 13.734  |
| H | -8.9635  | 3.9489  | 12.0721 |
| H | -8.7252  | 5.6196  | 12.6207 |
| H | -8.7598  | -0.7958 | 9.8247  |
| H | -9.1606  | -2.0951 | 8.6953  |
| H | -8.9843  | -0.4554 | 8.062   |
| H | -12.2133 | 8.9995  | 13.0967 |
| H | -12.3803 | 10.2069 | 11.726  |
| C | -14.8176 | 6.5531  | 11.6626 |
| H | -15.0749 | 5.5257  | 11.9475 |
| H | -15.3004 | 7.2243  | 12.3837 |
| H | -15.2849 | 6.7303  | 10.69   |
| C | -12.3661 | 0.7595  | 9.7674  |
| C | -12.5382 | 2.2254  | 10.0469 |
| C | -13.2747 | 2.8323  | 8.8315  |
| O | -14.4377 | 3.2205  | 8.8987  |
| O | -12.5181 | 2.8071  | 7.702   |
| C | -13.1517 | 3.2819  | 6.5046  |
| C | -13.8903 | 2.145   | 5.8246  |
| O | -13.3088 | 2.3232  | 11.2429 |
| H | -10.8871 | 2.586   | 11.3905 |
| H | -13.1983 | 0.0692  | 9.7327  |
| H | -13.8196 | 4.1253  | 6.7128  |
| H | -12.3581 | 3.653   | 5.8481  |
| H | -13.2101 | 1.3109  | 5.6229  |
| H | -14.6882 | 1.7569  | 6.4656  |
| H | -14.3309 | 2.4779  | 4.8806  |
| H | -14.2247 | 2.5309  | 10.9672 |

### Compound 6\_10

Charge = 0 Multiplicity = 1

Symbolic Z-Matrix:

|   |          |         |         |
|---|----------|---------|---------|
| C | -13.6426 | 6.0762  | 9.8279  |
| C | -13.6973 | 7.5483  | 9.4196  |
| C | -13.8627 | 8.4979  | 10.5955 |
| C | -12.8951 | 8.1904  | 11.7189 |
| C | -12.896  | 6.7311  | 12.2112 |
| C | -12.6846 | 5.7353  | 11.0055 |
| C | -11.1696 | 5.4309  | 10.5722 |
| C | -10.2755 | 5.1905  | 11.8439 |
| C | -10.4428 | 6.3014  | 12.8856 |
| C | -11.8854 | 6.4109  | 13.3421 |
| C | -12.1483 | 9.1893  | 12.2232 |
| C | -11.1177 | 4.1552  | 9.6298  |
| C | -11.6705 | 2.8345  | 10.2094 |
| C | -10.6222 | 1.7558  | 10.4081 |
| C | -11.1743 | 0.4128  | 10.0949 |
| C | -10.572  | 6.5854  | 9.7296  |
| C | -8.7688  | 5.0354  | 11.573  |
| O | -9.4932  | 1.9545  | 10.8319 |
| O | -10.6345 | -0.8243 | 10.3026 |
| C | -9.3199  | -0.8411 | 10.8458 |
| H | -14.6579 | 5.7753  | 10.1187 |
| H | -13.4235 | 5.4741  | 8.9435  |
| H | -12.8042 | 7.83    | 8.8567  |
| H | -14.5342 | 7.6918  | 8.7246  |
| H | -13.7385 | 9.5258  | 10.232  |
| H | -14.8902 | 8.4428  | 10.9729 |
| H | -13.0587 | 4.7768  | 11.3863 |
| H | -10.604  | 4.2567  | 12.3175 |
| H | -9.8237  | 6.0744  | 13.7633 |
| H | -10.0757 | 7.256   | 12.4967 |
| H | -12.1535 | 5.4512  | 13.8071 |
| H | -11.9583 | 7.1486  | 14.1513 |
| H | -11.6514 | 4.4165  | 8.7132  |
| H | -10.0854 | 3.9995  | 9.2936  |
| H | -9.524   | 6.3997  | 9.472   |
| H | -10.6136 | 7.5467  | 10.2446 |
| H | -11.0816 | 6.6842  | 8.7676  |
| H | -8.2611  | 4.6764  | 12.4759 |
| H | -8.5529  | 4.3198  | 10.7785 |
| H | -8.3031  | 5.9893  | 11.304  |
| H | -9.3004  | -0.39   | 11.843  |
| H | -9.0153  | -1.8871 | 10.9492 |
| H | -8.6089  | -0.3537 | 10.171  |
| H | -11.4543 | 9.0549  | 13.0444 |
| H | -12.2154 | 10.1998 | 11.8291 |
| C | -14.2931 | 6.4756  | 12.8577 |
| H | -14.3684 | 5.4521  | 13.2444 |
| H | -14.466  | 7.1575  | 13.6995 |
| H | -15.1249 | 6.6045  | 12.1597 |
| C | -12.3715 | 0.6298  | 9.5479  |
| C | -12.7139 | 2.0755  | 9.3603  |
| C | -12.6454 | 2.382   | 7.8397  |
| O | -11.7392 | 2.0512  | 7.0876  |
| O | -13.7381 | 3.1242  | 7.4774  |
| C | -13.7971 | 3.5095  | 6.0952  |
| C | -14.4461 | 2.4118  | 5.2738  |
| O | -14.0062 | 2.2615  | 9.9289  |
| H | -12.0844 | 2.9981  | 11.211  |
| H | -13.0206 | -0.1686 | 9.214   |
| H | -14.4063 | 4.4178  | 6.0436  |
| H | -12.8034 | 3.7666  | 5.711   |
| H | -13.8547 | 1.4915  | 5.3102  |
| H | -15.4371 | 2.1692  | 5.6714  |
| H | -14.5502 | 2.7189  | 4.2294  |
| H | -14.4286 | 2.9823  | 9.4236  |

### Compound 6\_11

Charge = 0 Multiplicity = 1

Symbolic Z-Matrix:

|   |          |         |         |
|---|----------|---------|---------|
| C | -13.627  | 5.9897  | 9.7425  |
| C | -13.718  | 7.4432  | 9.2784  |
| C | -13.9152 | 8.4315  | 10.4167 |
| C | -12.9452 | 8.1923  | 11.5543 |
| C | -12.9103 | 6.7534  | 12.1023 |
| C | -12.6679 | 5.7175  | 10.9368 |
| C | -11.1437 | 5.4333  | 10.5219 |
| C | -10.2485 | 5.2694  | 11.8048 |
| C | -10.4503 | 6.4156  | 12.801  |
| C | -11.8971 | 6.5035  | 13.2483 |
| C | -12.2267 | 9.2289  | 12.0225 |
| C | -11.0554 | 4.1203  | 9.6338  |
| C | -11.5748 | 2.8103  | 10.2669 |
| C | -10.4918 | 1.7823  | 10.5248 |
| C | -10.9717 | 0.4075  | 10.2442 |
| C | -10.5727 | 6.5667  | 9.6334  |
| C | -8.7369  | 5.1463  | 11.5443 |
| O | -9.38    | 2.0291  | 10.9683 |
| O | -10.2439 | -0.6956 | 10.5646 |
| C | -10.8236 | -1.9471 | 10.2211 |
| H | -14.6359 | 5.6722  | 10.0379 |
| H | -13.3845 | 5.3626  | 8.8827  |
| H | -12.8291 | 7.727   | 8.7099  |
| H | -14.5541 | 7.5379  | 8.5742  |
| H | -13.8169 | 9.4481  | 10.0152 |
| H | -14.9428 | 8.3628  | 10.7918 |
| H | -13.0207 | 4.7654  | 11.3522 |
| H | -10.5529 | 4.3465  | 12.3144 |
| H | -9.8288  | 6.2406  | 13.6889 |
| H | -10.1076 | 7.3637  | 12.3754 |
| H | -12.1417 | 5.5555  | 13.7488 |
| H | -11.9933 | 7.2694  | 14.0284 |
| H | -11.5915 | 4.3293  | 8.7058  |
| H | -10.018  | 3.9781  | 9.3071  |
| H | -9.5195  | 6.3975  | 9.3861  |
| H | -10.6408 | 7.5471  | 10.1083 |
| H | -11.0816 | 6.6125  | 8.667   |
| H | -8.223   | 4.8356  | 12.4615 |
| H | -8.4979  | 4.4084  | 10.7773 |
| H | -8.2969  | 6.1023  | 11.2413 |
| H | -10.9702 | -2.0275 | 9.1388  |
| H | -10.1312 | -2.7364 | 10.5283 |
| H | -11.7688 | -2.1002 | 10.7527 |
| H | -11.533  | 9.1441  | 12.8506 |
| H | -12.3181 | 10.2216 | 11.5898 |
| C | -14.3034 | 6.4864  | 12.7529 |
| H | -14.3535 | 5.4773  | 13.1796 |
| H | -14.4987 | 7.1962  | 13.5663 |
| H | -15.1347 | 6.5652  | 12.0468 |
| C | -12.1723 | 0.5473  | 9.6714  |
| C | -12.5776 | 1.9735  | 9.4415  |
| C | -12.5365 | 2.2376  | 7.9126  |
| O | -11.6643 | 1.8563  | 7.1445  |
| O | -13.6114 | 3.0077  | 7.5559  |
| C | -13.6518 | 3.3491  | 6.1642  |
| C | -14.8597 | 4.2355  | 5.9324  |
| O | -13.8809 | 2.1096  | 10.0017 |
| H | -12.0081 | 3.0042  | 11.2545 |
| H | -12.7972 | -0.2716 | 9.3445  |
| H | -12.7392 | 3.8892  | 5.8883  |
| H | -13.7388 | 2.4366  | 5.5642  |
| H | -15.7792 | 3.7191  | 6.2272  |
| H | -14.7948 | 5.1427  | 6.5423  |
| H | -14.9371 | 4.5224  | 4.88    |
| H | -14.2942 | 2.8726  | 9.5543  |



Compound 6\_12

Charge = 0 Multiplicity = 1

Symbolic Z-Matrix:

|   |          |         |         |
|---|----------|---------|---------|
| C | -13.1639 | 6.139   | 9.1921  |
| C | -13.0938 | 7.6208  | 8.8241  |
| C | -13.6692 | 8.5327  | 9.8934  |
| C | -13.1126 | 8.2092  | 11.2627 |
| C | -13.2511 | 6.7379  | 11.7031 |
| C | -12.652  | 5.7578  | 10.6125 |
| C | -11.0891 | 5.4476  | 10.6949 |
| C | -10.6806 | 5.1883  | 12.1917 |
| C | -11.1396 | 6.3135  | 13.1219 |
| C | -12.6541 | 6.4228  | 13.0991 |
| C | -12.5782 | 9.2045  | 11.9939 |
| C | -10.6955 | 4.1966  | 9.7984  |
| C | -11.0279 | 2.7707  | 10.2828 |
| C | -10.2184 | 1.7025  | 9.5733  |
| C | -10.9711 | 0.4239  | 9.5117  |
| C | -10.2589 | 6.6261  | 10.1222 |
| C | -9.1842  | 4.934   | 12.4312 |
| O | -9.0789  | 1.8394  | 9.1529  |
| O | -10.3897 | -0.7472 | 9.1405  |
| C | -11.2311 | -1.8927 | 9.1492  |
| H | -14.2154 | 5.8332  | 9.1171  |
| H | -12.6507 | 5.5706  | 8.4142  |
| H | -12.0649 | 7.9217  | 8.6115  |
| H | -13.6423 | 7.7788  | 7.887   |
| H | -13.4619 | 9.573   | 9.6123  |
| H | -14.7614 | 8.4451  | 9.9094  |
| H | -13.1161 | 4.7906  | 10.8337 |
| H | -11.2072 | 4.2878  | 12.532  |
| H | -10.8295 | 6.0899  | 14.1508 |
| H | -10.6607 | 7.2616  | 12.8601 |
| H | -13.0567 | 5.4643  | 13.4575 |
| H | -12.9817 | 7.1597  | 13.8432 |
| H | -11.0494 | 4.3344  | 8.7735  |
| H | -9.6027  | 4.2349  | 9.6805  |
| H | -9.1835  | 6.4711  | 10.2566 |
| H | -10.5042 | 7.582   | 10.5873 |
| H | -10.3986 | 6.7198  | 9.0413  |
| H | -9.0184  | 4.6168  | 13.4674 |
| H | -8.7907  | 4.1409  | 11.7906 |
| H | -8.5847  | 5.8358  | 12.2743 |
| H | -12.0577 | -1.7768 | 8.4402  |
| H | -10.6339 | -2.7538 | 8.8349  |
| H | -11.6103 | -2.0928 | 10.1569 |
| H | -12.178  | 9.0617  | 12.9905 |
| H | -12.5289 | 10.2213 | 11.6133 |
| C | -14.7774 | 6.4556  | 11.8593 |
| H | -14.9563 | 5.4257  | 12.1915 |
| H | -15.226  | 7.1234  | 12.605  |
| H | -15.3389 | 6.5822  | 10.9295 |
| C | -12.2214 | 0.7222  | 9.8858  |
| C | -12.4428 | 2.1903  | 10.1361 |
| C | -13.3063 | 2.7219  | 8.97    |
| O | -14.4739 | 3.069   | 9.1253  |
| O | -12.6531 | 2.6827  | 7.7793  |
| C | -13.4368 | 3.0875  | 6.6498  |
| C | -12.5357 | 3.092   | 5.4309  |
| O | -13.1216 | 2.2823  | 11.3876 |
| H | -10.7091 | 2.6742  | 11.328  |
| H | -13.0315 | 0.0101  | 9.9539  |
| H | -14.2578 | 2.3771  | 6.5039  |
| H | -13.8436 | 4.0914  | 6.8125  |
| H | -11.6973 | 3.7817  | 5.5751  |
| H | -12.1057 | 2.0986  | 5.2656  |
| H | -13.0897 | 3.3909  | 4.5368  |
| H | -14.0437 | 2.5428  | 11.1868 |

### Compound 6\_13

Charge = 0 Multiplicity = 1

Symbolic Z-Matrix:

|   |          |         |         |
|---|----------|---------|---------|
| C | -13.7614 | 5.9665  | 9.9084  |
| C | -13.8934 | 7.4083  | 9.4187  |
| C | -13.9749 | 8.4264  | 10.5458 |
| C | -12.9048 | 8.2084  | 11.5951 |
| C | -12.8221 | 6.782   | 12.1693 |
| C | -12.6896 | 5.7218  | 11.0084 |
| C | -11.2104 | 5.432   | 10.4555 |
| C | -10.204  | 5.2801  | 11.6537 |
| C | -10.3089 | 6.4423  | 12.6471 |
| C | -11.7084 | 6.5498  | 13.2221 |
| C | -12.1442 | 9.2518  | 11.9728 |
| C | -11.2025 | 4.1131  | 9.5729  |
| C | -11.673  | 2.8072  | 10.2484 |
| C | -10.5712 | 1.7922  | 10.4758 |
| C | -11.0557 | 0.4089  | 10.2488 |
| C | -10.7214 | 6.556   | 9.5077  |
| C | -8.7224  | 5.1467  | 11.2592 |
| O | -9.4414  | 2.0541  | 10.8608 |
| O | -10.3103 | -0.6834 | 10.5659 |
| C | -10.8971 | -1.9449 | 10.2756 |
| H | -14.7368 | 5.6632  | 10.3113 |
| H | -13.6096 | 5.3128  | 9.0473  |
| H | -13.0649 | 7.673   | 8.7576  |
| H | -14.7948 | 7.49    | 8.7984  |
| H | -13.9082 | 9.4317  | 10.1109 |
| H | -14.9631 | 8.3761  | 11.0171 |
| H | -12.9975 | 4.7794  | 11.4775 |
| H | -10.4671 | 4.3656  | 12.2005 |
| H | -9.6109  | 6.2756  | 13.4779 |
| H | -10.0001 | 7.3818  | 12.1784 |
| H | -11.9102 | 5.6139  | 13.763  |
| H | -11.729  | 7.3324  | 13.9912 |
| H | -11.8197 | 4.3218  | 8.6971  |
| H | -10.199  | 3.9634  | 9.1564  |
| H | -9.6946  | 6.3829  | 9.1689  |
| H | -10.7458 | 7.5416  | 9.9755  |
| H | -11.3144 | 6.5922  | 8.5901  |
| H | -8.1293  | 4.8427  | 12.1296 |
| H | -8.5559  | 4.4005  | 10.4811 |
| H | -8.3077  | 6.0974  | 10.9078 |
| H | -11.0867 | -2.0515 | 9.2022  |
| H | -10.189  | -2.724  | 10.5731 |
| H | -11.8194 | -2.0891 | 10.8482 |
| H | -11.3775 | 9.1812  | 12.7354 |
| H | -12.2726 | 10.2353 | 11.5289 |
| C | -14.1497 | 6.5354  | 12.9518 |
| H | -14.1648 | 5.534   | 13.3988 |
| H | -14.264  | 7.2601  | 13.7674 |
| H | -15.0435 | 6.6083  | 12.326  |
| C | -12.2793 | 0.5304  | 9.7224  |
| C | -12.6978 | 1.9496  | 9.4726  |
| C | -12.6988 | 2.1782  | 7.936   |
| O | -11.8379 | 1.7901  | 7.1586  |
| O | -13.795  | 2.9222  | 7.5875  |
| C | -13.924  | 3.222   | 6.1887  |
| C | -13.1559 | 4.4858  | 5.8497  |
| O | -13.9836 | 2.0954  | 10.0685 |
| H | -12.0686 | 3.0098  | 11.2495 |
| H | -12.9134 | -0.2981 | 9.4406  |
| H | -13.6014 | 2.3774  | 5.5692  |
| H | -14.9901 | 3.3758  | 5.9926  |
| H | -13.4948 | 5.3209  | 6.4715  |
| H | -12.0859 | 4.3596  | 6.042   |
| H | -13.2926 | 4.752   | 4.7978  |
| H | -14.4135 | 2.8454  | 9.6149  |

### Compound 7\_1

Charge = 0 Multiplicity = 1

Symbolic Z-Matrix:

|   |          |         |         |
|---|----------|---------|---------|
| C | -11.8826 | 8.1376  | 10.5321 |
| C | -11.789  | 7.219   | 11.7503 |
| C | -13.1289 | 6.6463  | 12.1781 |
| C | -13.8826 | 6.0487  | 11.0097 |
| C | -14.0791 | 6.9873  | 9.8021  |
| C | -12.6981 | 7.5926  | 9.3225  |
| C | -11.8472 | 6.7175  | 8.2932  |
| C | -12.7946 | 6.1383  | 7.1727  |
| C | -13.9975 | 5.4012  | 7.7663  |
| C | -14.8339 | 6.3523  | 8.605   |
| C | -14.3443 | 4.7891  | 11.1139 |
| C | -10.7017 | 7.5842  | 7.622   |
| C | -11.1343 | 8.7927  | 6.7666  |
| C | -10.8787 | 10.1503 | 7.3932  |
| C | -10.4993 | 11.1479 | 6.357   |
| C | -11.1089 | 5.5556  | 9.0045  |
| C | -12.1228 | 5.2252  | 6.135   |
| O | -11.013  | 10.4109 | 8.5792  |
| O | -10.3747 | 12.5041 | 6.455   |
| C | -10.6992 | 13.0634 | 7.7224  |
| H | -12.3504 | 9.0752  | 10.8602 |
| H | -10.8685 | 8.4191  | 10.2387 |
| H | -11.0915 | 6.3979  | 11.5661 |
| H | -11.3583 | 7.7835  | 12.5868 |
| H | -12.9538 | 5.901   | 12.9642 |
| H | -13.736  | 7.4293  | 12.6465 |
| H | -12.975  | 8.4852  | 8.7436  |
| H | -13.2067 | 6.9787  | 6.6021  |
| H | -14.6302 | 5.0165  | 6.9559  |
| H | -13.6785 | 4.5274  | 8.3418  |
| H | -15.1892 | 7.1502  | 7.9369  |
| H | -15.745  | 5.8417  | 8.9414  |
| H | -9.9974  | 7.9201  | 8.3919  |
| H | -10.1164 | 6.8943  | 7.005   |
| H | -10.5811 | 4.9126  | 8.2929  |
| H | -11.7814 | 4.9167  | 9.579   |
| H | -10.3306 | 5.9304  | 9.6752  |
| H | -12.8387 | 4.9613  | 5.3476  |
| H | -11.2807 | 5.7134  | 5.639   |
| H | -11.7747 | 4.2864  | 6.5754  |
| H | -11.7332 | 12.8369 | 8.0021  |
| H | -9.994   | 12.7287 | 8.4896  |
| H | -10.6077 | 14.1507 | 7.6402  |
| H | -14.9123 | 4.2978  | 10.3331 |
| H | -14.1723 | 4.1975  | 12.009  |
| C | -15.0082 | 8.1463  | 10.2784 |
| H | -15.2142 | 8.8484  | 9.4614  |
| H | -15.9728 | 7.7579  | 10.628  |
| H | -14.5805 | 8.7373  | 11.0931 |
| C | -10.2823 | 10.45   | 5.2405  |
| C | -10.4072 | 8.9684  | 5.416   |
| C | -8.9962  | 8.3394  | 5.3245  |
| O | -8.6779  | 7.5633  | 4.4283  |
| O | -8.1793  | 8.7619  | 6.3265  |
| C | -6.8582  | 8.2089  | 6.2905  |
| C | -6.0933  | 8.7417  | 7.4859  |
| O | -11.2586 | 8.4949  | 4.3733  |
| H | -12.2141 | 8.7656  | 6.5842  |
| H | -9.988   | 10.9054 | 4.3046  |
| H | -6.9127  | 7.1157  | 6.3429  |
| H | -6.358   | 8.5108  | 5.3637  |
| H | -5.0735  | 8.3473  | 7.5044  |
| H | -6.0494  | 9.8356  | 7.459   |
| H | -6.5965  | 8.4664  | 8.4188  |
| H | -10.706  | 7.9299  | 3.7955  |

## Compound 7\_2

Charge = 0 Multiplicity = 1

Symbolic Z-Matrix:

|   |          |         |         |
|---|----------|---------|---------|
| C | -11.9122 | 8.216   | 10.5301 |
| C | -11.7983 | 7.3188  | 11.7625 |
| C | -13.1185 | 6.6929  | 12.1767 |
| C | -13.8254 | 6.0468  | 11.0049 |
| C | -14.0431 | 6.9595  | 9.7813  |
| C | -12.6825 | 7.6191  | 9.3154  |
| C | -11.7768 | 6.7691  | 8.3126  |
| C | -12.6785 | 6.1334  | 7.1852  |
| C | -13.8574 | 5.3515  | 7.7695  |
| C | -14.7489 | 6.2754  | 8.5813  |
| C | -14.2325 | 4.7693  | 11.1194 |
| C | -10.6595 | 7.6761  | 7.6479  |
| C | -11.1282 | 8.8525  | 6.7671  |
| C | -10.9458 | 10.2279 | 7.3802  |
| C | -10.5839 | 11.2277 | 6.3399  |
| C | -10.9993 | 5.6508  | 9.0519  |
| C | -11.9497 | 5.2375  | 6.1713  |
| O | -11.1194 | 10.4978 | 8.5591  |
| O | -10.5185 | 12.5891 | 6.4228  |
| C | -10.9034 | 13.1503 | 7.6724  |
| H | -12.4266 | 9.1362  | 10.8374 |
| H | -10.9068 | 8.5384  | 10.2491 |
| H | -11.0622 | 6.5273  | 11.601  |
| H | -11.407  | 7.9131  | 12.5977 |
| H | -12.9236 | 5.9667  | 12.976  |
| H | -13.7673 | 7.4542  | 12.6242 |
| H | -12.9889 | 8.4906  | 8.7193  |
| H | -13.1179 | 6.947   | 6.5964  |
| H | -14.4587 | 4.9282  | 6.9546  |
| H | -13.5096 | 4.5005  | 8.3624  |
| H | -15.1281 | 7.0477  | 7.8963  |
| H | -15.642  | 5.7293  | 8.9101  |
| H | -9.9833  | 8.053   | 8.424   |
| H | -10.0355 | 7.0032  | 7.051   |
| H | -10.4317 | 5.0226  | 8.3579  |
| H | -11.6522 | 4.9902  | 9.6245  |
| H | -10.2496 | 6.0689  | 9.7295  |
| H | -12.64   | 4.9311  | 5.3765  |
| H | -11.1222 | 5.7562  | 5.6817  |
| H | -11.5672 | 4.3212  | 6.6304  |
| H | -11.9339 | 12.8817 | 7.9266  |
| H | -10.2061 | 12.8577 | 8.4637  |
| H | -10.8577 | 14.2394 | 7.5768  |
| H | -14.765  | 4.2428  | 10.3366 |
| H | -14.0494 | 4.198   | 12.0254 |
| C | -15.0305 | 8.0822  | 10.2261 |
| H | -15.2537 | 8.7634  | 9.3961  |
| H | -15.9826 | 7.656   | 10.5656 |
| H | -14.643  | 8.7025  | 11.0392 |
| C | -10.3116 | 10.526  | 5.2382  |
| C | -10.3807 | 9.0431  | 5.4294  |
| C | -8.9458  | 8.465   | 5.375   |
| O | -8.5931  | 7.6659  | 4.5126  |
| O | -8.159   | 8.9499  | 6.3732  |
| C | -6.8115  | 8.4571  | 6.4105  |
| C | -6.7537  | 7.1631  | 7.2005  |
| O | -11.1913 | 8.5248  | 4.3751  |
| H | -12.2016 | 8.7746  | 6.5631  |
| H | -10.0148 | 10.9816 | 4.3032  |
| H | -6.4057  | 8.3299  | 5.4005  |
| H | -6.2051  | 9.2207  | 6.9084  |
| H | -5.7232  | 6.8081  | 7.2891  |
| H | -7.1663  | 7.3069  | 8.2046  |
| H | -7.3523  | 6.3827  | 6.72    |
| H | -10.6187 | 7.9304  | 3.8484  |

### Compound 7\_3

Charge = 0 Multiplicity = 1

Symbolic Z-Matrix:

|   |          |         |         |
|---|----------|---------|---------|
| C | -12.0005 | 8.1373  | 10.5796 |
| C | -11.9541 | 7.2246  | 11.8048 |
| C | -13.3089 | 6.6505  | 12.1808 |
| C | -14.0134 | 6.0458  | 10.9857 |
| C | -14.163  | 6.9784  | 9.7669  |
| C | -12.7652 | 7.5847  | 9.3406  |
| C | -11.8714 | 6.707   | 8.3505  |
| C | -12.7714 | 6.1202  | 7.1954  |
| C | -13.9958 | 5.3832  | 7.7433  |
| C | -14.8674 | 6.3361  | 8.5432  |
| C | -14.4761 | 4.7855  | 11.077  |
| C | -10.7019 | 7.5737  | 7.7219  |
| C | -11.1037 | 8.7773  | 6.845   |
| C | -10.8716 | 10.1382 | 7.4733  |
| C | -10.4551 | 11.1306 | 6.4463  |
| C | -11.1597 | 5.5503  | 9.0964  |
| C | -12.0562 | 5.2037  | 6.1903  |
| O | -11.0492 | 10.4049 | 8.6522  |
| O | -10.3342 | 12.4874 | 6.5418  |
| C | -10.7095 | 13.0535 | 7.7919  |
| H | -12.4833 | 9.0754  | 10.884  |
| H | -10.976  | 8.42    | 10.326  |
| H | -11.2479 | 6.4044  | 11.6528 |
| H | -11.5589 | 7.794   | 12.6554 |
| H | -13.1639 | 5.9092  | 12.9768 |
| H | -13.9361 | 7.4341  | 12.6207 |
| H | -13.0205 | 8.4742  | 8.7471  |
| H | -13.1618 | 6.9569  | 6.6044  |
| H | -14.5943 | 4.9932  | 6.91    |
| H | -13.6984 | 4.5128  | 8.3354  |
| H | -15.1971 | 7.13    | 7.8575  |
| H | -15.7903 | 5.8248  | 8.8448  |
| H | -10.0299 | 7.9148  | 8.5179  |
| H | -10.0904 | 6.8829  | 7.132   |
| H | -10.602  | 4.9054  | 8.4098  |
| H | -11.8534 | 4.9122  | 9.6462  |
| H | -10.4101 | 5.9301  | 9.7964  |
| H | -12.739  | 4.9346  | 5.3757  |
| H | -11.1956 | 5.6914  | 5.7265  |
| H | -11.7244 | 4.2677  | 6.649   |
| H | -11.7534 | 12.8267 | 8.0321  |
| H | -10.0346 | 12.7248 | 8.5884  |
| H | -10.6167 | 14.1406 | 7.7068  |
| H | -15.0109 | 4.2893  | 10.2762 |
| H | -14.3391 | 4.1984  | 11.9811 |
| C | -15.1133 | 8.1372  | 10.1998 |
| H | -15.2877 | 8.835   | 9.3719  |
| H | -16.0903 | 7.7481  | 10.512  |
| H | -14.7201 | 8.733   | 11.0284 |
| C | -10.198  | 10.427  | 5.342   |
| C | -10.3293 | 8.9463  | 5.5205  |
| C | -8.9159  | 8.3167  | 5.4797  |
| O | -8.571   | 7.5362  | 4.5974  |
| O | -8.1315  | 8.75    | 6.5032  |
| C | -6.7947  | 8.2288  | 6.5375  |
| C | -5.8797  | 9.0877  | 5.6854  |
| O | -11.144  | 8.4682  | 4.4507  |
| H | -12.1763 | 8.7487  | 6.6244  |
| H | -9.8699  | 10.8775 | 4.415   |
| H | -6.4654  | 8.2612  | 7.5811  |
| H | -6.7686  | 7.1792  | 6.2233  |
| H | -4.8464  | 8.7354  | 5.7491  |
| H | -6.1907  | 9.0715  | 4.6361  |
| H | -5.9182  | 10.1319 | 6.0126  |
| H | -10.5721 | 7.8979  | 3.8971  |

### Compound 7\_4

Charge = 0 Multiplicity = 1

Symbolic Z-Matrix:

|   |          |         |         |
|---|----------|---------|---------|
| C | -11.8933 | 8.0187  | 10.5944 |
| C | -11.7973 | 7.0505  | 11.7733 |
| C | -13.137  | 6.4638  | 12.1823 |
| C | -13.8966 | 5.9163  | 10.9932 |
| C | -14.0953 | 6.9047  | 9.8264  |
| C | -12.7146 | 7.5258  | 9.3665  |
| C | -11.8699 | 6.6917  | 8.2991  |
| C | -12.8229 | 6.1615  | 7.1593  |
| C | -14.0257 | 5.4036  | 7.7266  |
| C | -14.8563 | 6.3213  | 8.6071  |
| C | -14.3612 | 4.6546  | 11.0474 |
| C | -10.7241 | 7.5821  | 7.6596  |
| C | -11.1562 | 8.8254  | 6.8552  |
| C | -10.8974 | 10.1515 | 7.5406  |
| C | -10.5036 | 11.1952 | 6.5595  |
| C | -11.1322 | 5.4996  | 8.9592  |
| C | -12.1576 | 5.2903  | 6.0823  |
| O | -11.0388 | 10.3721 | 8.734   |
| O | -10.4248 | 12.5115 | 6.8908  |
| C | -10.0541 | 13.398  | 5.8434  |
| H | -12.3577 | 8.943   | 10.9626 |
| H | -10.8796 | 8.3098  | 10.3088 |
| H | -11.1025 | 6.2362  | 11.5528 |
| H | -11.3621 | 7.5791  | 12.6306 |
| H | -12.9607 | 5.6863  | 12.9365 |
| H | -13.7403 | 7.2281  | 12.6849 |
| H | -12.9916 | 8.4419  | 8.8256  |
| H | -13.235  | 7.0257  | 6.6255  |
| H | -14.6623 | 5.0542  | 6.9035  |
| H | -13.7068 | 4.506   | 8.2644  |
| H | -15.2122 | 7.1469  | 7.9738  |
| H | -15.7675 | 5.7994  | 8.9257  |
| H | -10.0159 | 7.8847  | 8.4397  |
| H | -10.143  | 6.9155  | 7.014   |
| H | -10.6091 | 4.8847  | 8.2198  |
| H | -11.8044 | 4.8394  | 9.5097  |
| H | -10.3503 | 5.8443  | 9.6416  |
| H | -12.877  | 5.0612  | 5.2873  |
| H | -11.3158 | 5.7962  | 5.6039  |
| H | -11.8106 | 4.3331  | 6.4822  |
| H | -9.0521  | 13.1641 | 5.4685  |
| H | -10.7876 | 13.3729 | 5.0306  |
| H | -10.0346 | 14.4133 | 6.2505  |
| H | -14.9336 | 4.1974  | 10.2495 |
| H | -14.1872 | 4.0265  | 11.9169 |
| C | -15.0197 | 8.0451  | 10.3537 |
| H | -15.2271 | 8.7808  | 9.5672  |
| H | -15.9839 | 7.6449  | 10.6908 |
| H | -14.5874 | 8.6011  | 11.1904 |
| C | -10.2832 | 10.5513 | 5.4074  |
| C | -10.4247 | 9.062   | 5.5166  |
| C | -9.0244  | 8.413   | 5.3999  |
| O | -8.7435  | 7.6058  | 4.519   |
| O | -8.1776  | 8.8403  | 6.3743  |
| C | -6.8715  | 8.2534  | 6.3286  |
| C | -6.0698  | 8.7997  | 7.4934  |
| O | -11.2752 | 8.6555  | 4.4446  |
| H | -12.2354 | 8.8076  | 6.669   |
| H | -9.9827  | 11.0222 | 4.4824  |
| H | -6.952   | 7.1639  | 6.4129  |
| H | -6.3826  | 8.5167  | 5.3842  |
| H | -5.0599  | 8.3803  | 7.5033  |
| H | -5.9994  | 9.891   | 7.4348  |
| H | -6.5608  | 8.5632  | 8.4433  |
| H | -10.829  | 7.9046  | 4.0025  |

### Compound 7\_5

Charge = 0 Multiplicity = 1

Symbolic Z-Matrix:

|   |          |         |         |
|---|----------|---------|---------|
| C | -12.2871 | 8.4013  | 10.5914 |
| C | -12.2473 | 7.5727  | 11.8754 |
| C | -13.5278 | 6.7981  | 12.1331 |
| C | -13.971  | 6.0235  | 10.9108 |
| C | -14.1158 | 6.8548  | 9.6204  |
| C | -12.7923 | 7.6658  | 9.3149  |
| C | -11.6513 | 6.904   | 8.4976  |
| C | -12.2908 | 6.1078  | 7.2951  |
| C | -13.4417 | 5.2077  | 7.7514  |
| C | -14.5483 | 6.0423  | 8.3722  |
| C | -14.2336 | 4.7098  | 11.0378 |
| C | -10.5726 | 7.9262  | 7.9411  |
| C | -11.0581 | 8.9936  | 6.9363  |
| C | -11.1244 | 10.4002 | 7.5036  |
| C | -10.7033 | 11.4046 | 6.4936  |
| C | -10.8554 | 5.9297  | 9.4023  |
| C | -11.3164 | 5.2646  | 6.4575  |
| O | -11.527  | 10.6805 | 8.6228  |
| O | -10.7789 | 12.7676 | 6.5317  |
| C | -11.2848 | 13.325  | 7.7387  |
| H | -12.949  | 9.2587  | 10.7717 |
| H | -11.2979 | 8.839   | 10.4375 |
| H | -11.4047 | 6.8768  | 11.8639 |
| H | -12.0585 | 8.2431  | 12.7232 |
| H | -13.3656 | 6.1331  | 12.9909 |
| H | -14.3232 | 7.4859  | 12.4418 |
| H | -13.113  | 8.4675  | 8.6348  |
| H | -12.7297 | 6.8312  | 6.5981  |
| H | -13.86   | 4.6781  | 6.8858  |
| H | -13.0858 | 4.4331  | 8.437   |
| H | -14.9102 | 6.7336  | 7.5974  |
| H | -15.4087 | 5.4006  | 8.6002  |
| H | -10.0693 | 8.4221  | 8.7793  |
| H | -9.7872  | 7.3187  | 7.4822  |
| H | -10.1169 | 5.3563  | 8.8326  |
| H | -11.4968 | 5.2107  | 9.9146  |
| H | -10.2722 | 6.4704  | 10.153  |
| H | -11.8347 | 4.8457  | 5.5869  |
| H | -10.485  | 5.8566  | 6.0699  |
| H | -10.9112 | 4.42    | 7.0226  |
| H | -11.2838 | 14.4139 | 7.6292  |
| H | -12.3184 | 13.0105 | 7.9148  |
| H | -10.6398 | 13.0765 | 8.5876  |
| H | -14.5792 | 4.0907  | 10.2188 |
| H | -14.118  | 4.2013  | 11.9912 |
| C | -15.2873 | 7.857   | 9.8585  |
| H | -15.4676 | 8.4722  | 8.9687  |
| H | -16.2197 | 7.3248  | 10.0837 |
| H | -15.1018 | 8.552   | 10.6823 |
| C | -10.2106 | 10.7066 | 5.4695  |
| C | -10.1713 | 9.2269  | 5.6915  |
| C | -8.6871  | 8.8129  | 5.8832  |
| O | -7.8706  | 9.388   | 6.5896  |
| O | -8.4423  | 7.664   | 5.1789  |
| C | -7.1048  | 7.1671  | 5.3165  |
| C | -6.9976  | 5.8807  | 4.5216  |
| O | -10.7918 | 8.6337  | 4.5552  |
| H | -12.0785 | 8.7742  | 6.604   |
| H | -9.8204  | 11.17   | 4.5733  |
| H | -6.3959  | 7.9059  | 4.9269  |
| H | -6.8903  | 6.9676  | 6.3724  |
| H | -5.9912  | 5.4592  | 4.5949  |
| H | -7.7185  | 5.1415  | 4.8864  |
| H | -7.2308  | 6.0588  | 3.4666  |
| H | -10.3864 | 7.7521  | 4.4479  |

### Compound 7\_6

Charge = 0 Multiplicity = 1

Symbolic Z-Matrix:

|   |          |         |         |
|---|----------|---------|---------|
| C | -12.1547 | 8.3788  | 10.5647 |
| C | -12.0699 | 7.5366  | 11.8376 |
| C | -13.3523 | 6.7858  | 12.1503 |
| C | -13.8704 | 6.0328  | 10.944  |
| C | -14.0602 | 6.8799  | 9.6698  |
| C | -12.7363 | 7.6667  | 9.3076  |
| C | -11.6528 | 6.8898  | 8.4295  |
| C | -12.3672 | 6.1214  | 7.2513  |
| C | -13.5124 | 5.2392  | 7.7543  |
| C | -14.57   | 6.0889  | 8.437   |
| C | -14.1537 | 4.7235  | 11.0716 |
| C | -10.5787 | 7.8933  | 7.8327  |
| C | -11.082  | 8.9809  | 6.8596  |
| C | -11.1029 | 10.382  | 7.4439  |
| C | -10.7008 | 11.3902 | 6.4299  |
| C | -10.8362 | 5.8881  | 9.2847  |
| C | -11.453  | 5.2702  | 6.3562  |
| O | -11.4598 | 10.657  | 8.5798  |
| O | -10.7516 | 12.7539 | 6.4849  |
| C | -11.2023 | 13.3064 | 7.7158  |
| H | -12.7891 | 9.2475  | 10.7849 |
| H | -11.1652 | 8.798   | 10.3669 |
| H | -11.2435 | 6.8238  | 11.7786 |
| H | -11.8262 | 8.1943  | 12.6813 |
| H | -13.1626 | 6.109   | 12.993  |
| H | -14.1172 | 7.4865  | 12.5037 |
| H | -13.0723 | 8.4813  | 8.6504  |
| H | -12.8255 | 6.862   | 6.5856  |
| H | -13.9834 | 4.7277  | 6.9049  |
| H | -13.1395 | 4.45    | 8.4137  |
| H | -14.9555 | 6.7952  | 7.6875  |
| H | -15.4311 | 5.4621  | 8.7011  |
| H | -10.0245 | 8.3688  | 8.6503  |
| H | -9.8319  | 7.2717  | 7.3312  |
| H | -10.1388 | 5.3053  | 8.6742  |
| H | -11.4679 | 5.1775  | 9.8201  |
| H | -10.2057 | 6.4075  | 10.0118 |
| H | -10.6335 | 5.8525  | 5.9304  |
| H | -11.0329 | 4.4135  | 6.8914  |
| H | -12.0234 | 4.8686  | 5.5103  |
| H | -12.2342 | 13.008  | 7.9268  |
| H | -10.5308 | 13.0371 | 8.5373  |
| H | -11.1859 | 14.3962 | 7.6178  |
| H | -14.5511 | 4.1199  | 10.2647 |
| H | -14.0025 | 4.2031  | 12.0135 |
| C | -15.1974 | 7.9035  | 9.9739  |
| H | -15.4076 | 8.5315  | 9.0996  |
| H | -16.1289 | 7.3884  | 10.2392 |
| H | -14.9577 | 8.5861  | 10.794  |
| C | -10.2569 | 10.6955 | 5.3817  |
| C | -10.2348 | 9.213   | 5.5869  |
| C | -8.751   | 8.7742  | 5.7245  |
| O | -7.9093  | 9.3217  | 6.4231  |
| O | -8.5436  | 7.6404  | 4.9842  |
| C | -7.2158  | 7.0959  | 5.0393  |
| C | -7.0864  | 6.1573  | 6.2243  |
| O | -10.9044 | 8.6425  | 4.4671  |
| H | -12.1172 | 8.7825  | 6.5614  |
| H | -9.8911  | 11.1621 | 4.4769  |
| H | -7.0609  | 6.5387  | 4.1096  |
| H | -6.4602  | 7.8891  | 5.0694  |
| H | -6.1003  | 5.6846  | 6.2388  |
| H | -7.2303  | 6.6932  | 7.1677  |
| H | -7.8528  | 5.3764  | 6.1821  |
| H | -10.5107 | 7.7596  | 4.3305  |



**Compound 7\_7**

Charge = 0 Multiplicity = 1

Symbolic Z-Matrix:

|   |          |         |         |
|---|----------|---------|---------|
| C | -12.0157 | 8.023   | 10.6416 |
| C | -11.9645 | 7.0625  | 11.8296 |
| C | -13.3175 | 6.472   | 12.1862 |
| C | -14.0246 | 5.9138  | 10.9701 |
| C | -14.179  | 6.8941  | 9.7898  |
| C | -12.7831 | 7.5188  | 9.3839  |
| C | -11.8911 | 6.6821  | 8.3576  |
| C | -12.7936 | 6.1404  | 7.1826  |
| C | -14.0156 | 5.3806  | 7.7042  |
| C | -14.8861 | 6.2999  | 8.5436  |
| C | -14.4855 | 4.6503  | 11.0128 |
| C | -10.7239 | 7.5742  | 7.7605  |
| C | -11.129  | 8.8106  | 6.9321  |
| C | -10.8996 | 10.1422 | 7.6174  |
| C | -10.4728 | 11.1803 | 6.6441  |
| C | -11.1761 | 5.4975  | 9.0552  |
| C | -12.0802 | 5.2654  | 6.1399  |
| O | -11.0857 | 10.3702 | 8.8032  |
| O | -10.4093 | 12.4991 | 6.969   |
| C | -10.0016 | 13.3792 | 5.93    |
| H | -12.499  | 8.9474  | 10.9844 |
| H | -10.9924 | 8.3171  | 10.3965 |
| H | -11.2576 | 6.2501  | 11.6432 |
| H | -11.5677 | 7.5984  | 12.7009 |
| H | -13.1692 | 5.7     | 12.9519 |
| H | -13.9446 | 7.2366  | 12.6586 |
| H | -13.0413 | 8.4304  | 8.8264  |
| H | -13.1867 | 6.9994  | 6.6264  |
| H | -14.616  | 5.0234  | 6.8576  |
| H | -13.7155 | 4.4878  | 8.2604  |
| H | -15.2188 | 7.12    | 7.8909  |
| H | -15.8075 | 5.7759  | 8.8273  |
| H | -10.0499 | 7.8848  | 8.5674  |
| H | -10.1134 | 6.907   | 7.1434  |
| H | -10.6199 | 4.8808  | 8.342   |
| H | -11.8676 | 4.8375  | 9.5813  |
| H | -10.4249 | 5.8501  | 9.7674  |
| H | -12.7648 | 5.0283  | 5.317   |
| H | -11.2212 | 5.772   | 5.6938  |
| H | -11.7463 | 4.3122  | 6.5601  |
| H | -9.9992  | 14.3973 | 6.3304  |
| H | -8.9859  | 13.1449 | 5.5942  |
| H | -10.7044 | 13.3469 | 5.0907  |
| H | -15.0223 | 4.1856  | 10.1946 |
| H | -14.3452 | 4.0283  | 11.8927 |
| C | -15.1295 | 8.0335  | 10.2712 |
| H | -16.1051 | 7.6309  | 10.5704 |
| H | -14.7347 | 8.5965  | 11.1216 |
| H | -15.3072 | 8.7634  | 9.4721  |
| C | -10.2087 | 10.5292 | 5.5054  |
| C | -10.3499 | 9.0403  | 5.6198  |
| C | -8.9439  | 8.3955  | 5.5565  |
| O | -8.6316  | 7.5867  | 4.6878  |
| O | -8.1328  | 8.8353  | 6.5557  |
| C | -6.8071  | 8.286   | 6.5814  |
| C | -5.8881  | 9.1043  | 5.6945  |
| O | -11.1601 | 8.6241  | 4.5205  |
| H | -12.2006 | 8.7886  | 6.7066  |
| H | -9.8755  | 10.9945 | 4.5888  |
| H | -6.4602  | 8.3359  | 7.6186  |
| H | -6.8088  | 7.229   | 6.292   |
| H | -4.8616  | 8.7313  | 5.7502  |
| H | -6.2166  | 9.07    | 4.6509  |
| H | -5.899   | 10.1566 | 5.9969  |
| H | -10.6914 | 7.8776  | 4.0943  |

### Compound 7\_8

Charge = 0 Multiplicity = 1

Symbolic Z-Matrix:

|   |          |         |         |
|---|----------|---------|---------|
| C | -12.2725 | 8.3246  | 10.6118 |
| C | -12.2583 | 7.4713  | 11.88   |
| C | -13.5726 | 6.7565  | 12.1406 |
| C | -14.0688 | 6.0277  | 10.9105 |
| C | -14.1877 | 6.8891  | 9.6372  |
| C | -12.8291 | 7.639   | 9.329   |
| C | -11.7376 | 6.8368  | 8.4835  |
| C | -12.4315 | 6.0976  | 7.2747  |
| C | -13.6194 | 5.2463  | 7.7295  |
| C | -14.6756 | 6.1222  | 8.3806  |
| C | -14.3948 | 4.7265  | 11.0172 |
| C | -10.6143 | 7.8131  | 7.9328  |
| C | -11.0542 | 8.9221  | 6.9528  |
| C | -11.0555 | 10.3194 | 7.5463  |
| C | -10.5978 | 11.3228 | 6.5512  |
| C | -10.982  | 5.8059  | 9.3596  |
| C | -11.5109 | 5.2255  | 6.4066  |
| O | -11.4385 | 10.5967 | 8.6732  |
| O | -10.6162 | 12.6869 | 6.6131  |
| C | -11.0903 | 13.2438 | 7.8332  |
| H | -12.8887 | 9.2101  | 10.8163 |
| H | -11.2647 | 8.7157  | 10.4529 |
| H | -11.4516 | 6.7347  | 11.8448 |
| H | -12.0258 | 8.1155  | 12.7372 |
| H | -13.4332 | 6.0685  | 12.984  |
| H | -14.3288 | 7.4771  | 12.4721 |
| H | -13.1175 | 8.4679  | 8.6671  |
| H | -12.8436 | 6.8557  | 6.5985  |
| H | -14.0743 | 4.7547  | 6.8598  |
| H | -13.2938 | 4.442   | 8.3956  |
| H | -15.0128 | 6.8449  | 7.6234  |
| H | -15.5637 | 5.5194  | 8.6085  |
| H | -10.0771 | 8.2672  | 8.7737  |
| H | -9.8664  | 7.1752  | 7.4527  |
| H | -10.281  | 5.2064  | 8.7699  |
| H | -11.6531 | 5.1111  | 9.8671  |
| H | -10.3628 | 6.3018  | 10.1124 |
| H | -10.6577 | 5.7849  | 6.0175  |
| H | -11.1387 | 4.3516  | 6.9493  |
| H | -12.0612 | 4.849   | 5.5362  |
| H | -12.1351 | 12.9699 | 8.0112  |
| H | -10.4508 | 12.9535 | 8.6729  |
| H | -11.0441 | 14.3334 | 7.7424  |
| H | -14.7805 | 4.1406  | 10.1918 |
| H | -14.293  | 4.1953  | 11.9597 |
| C | -15.3046 | 7.9436  | 9.9087  |
| H | -15.4648 | 8.5836  | 9.0326  |
| H | -16.2597 | 7.4544  | 10.1363 |
| H | -15.0747 | 8.613   | 10.7424 |
| C | -10.1393 | 10.6226 | 5.5129  |
| C | -10.1599 | 9.1389  | 5.7106  |
| C | -8.6923  | 8.6652  | 5.8957  |
| O | -7.8635  | 9.1877  | 6.6281  |
| O | -8.4818  | 7.5386  | 5.1456  |
| C | -7.1668  | 6.9685  | 5.2368  |
| C | -6.237   | 7.637   | 4.242   |
| O | -10.8052 | 8.5899  | 4.5661  |
| H | -12.0841 | 8.7553  | 6.6192  |
| H | -9.7342  | 11.0844 | 4.6226  |
| H | -6.776   | 7.0309  | 6.2588  |
| H | -7.2631  | 5.9051  | 4.9941  |
| H | -5.2482  | 7.1702  | 4.2611  |
| H | -6.6429  | 7.5641  | 3.2277  |
| H | -6.1245  | 8.7029  | 4.4639  |
| H | -10.4198 | 7.7033  | 4.4305  |

### Compound 7\_9

Charge = 0 Multiplicity = 1

Symbolic Z-Matrix:

|   |          |         |         |
|---|----------|---------|---------|
| C | -13.0441 | 8.4704  | 10.2867 |
| C | -13.2473 | 7.8042  | 11.6479 |
| C | -14.3254 | 6.7306  | 11.6499 |
| C | -14.1901 | 5.7727  | 10.4841 |
| C | -14.0933 | 6.4335  | 9.0979  |
| C | -12.9363 | 7.5042  | 9.0734  |
| C | -11.4548 | 6.9766  | 8.7806  |
| C | -11.4866 | 5.9795  | 7.5665  |
| C | -12.5401 | 4.8779  | 7.7448  |
| C | -13.9311 | 5.4621  | 7.9009  |
| C | -14.2003 | 4.449   | 10.7239 |
| C | -10.4685 | 8.1892  | 8.491   |
| C | -10.9162 | 9.3434  | 7.5734  |
| C | -10.0541 | 10.5856 | 7.7051  |
| C | -10.0635 | 11.3586 | 6.4347  |
| C | -10.8408 | 6.2496  | 10.0065 |
| C | -10.1542 | 5.2827  | 7.242   |
| O | -9.4778  | 10.9339 | 8.725   |
| O | -9.615   | 12.6216 | 6.1765  |
| C | -9.0836  | 13.3251 | 7.2933  |
| H | -13.8974 | 9.1393  | 10.1135 |
| H | -12.1796 | 9.1381  | 10.3452 |
| H | -12.3127 | 7.3706  | 12.0114 |
| H | -13.5111 | 8.5752  | 12.3828 |
| H | -14.2835 | 6.1988  | 12.609  |
| H | -15.3143 | 7.2023  | 11.6205 |
| H | -13.1781 | 8.1162  | 8.1944  |
| H | -11.7745 | 6.549   | 6.6778  |
| H | -12.5417 | 4.2295  | 6.8588  |
| H | -12.2876 | 4.2297  | 8.5895  |
| H | -14.1634 | 5.9954  | 6.9676  |
| H | -14.6666 | 4.6494  | 7.9539  |
| H | -10.2379 | 8.6454  | 9.4642  |
| H | -9.493   | 7.8148  | 8.1677  |
| H | -9.8433  | 5.8564  | 9.7829  |
| H | -11.449  | 5.4126  | 10.3522 |
| H | -10.6886 | 6.9314  | 10.8464 |
| H | -10.2236 | 4.7729  | 6.274   |
| H | -9.3172  | 5.9776  | 7.1779  |
| H | -9.9013  | 4.5197  | 7.9857  |
| H | -9.8314  | 13.4326 | 8.0857  |
| H | -8.1743  | 12.8412 | 7.6637  |
| H | -8.8104  | 14.3295 | 6.9554  |
| H | -14.1342 | 3.7043  | 9.9398  |
| H | -14.2864 | 4.0592  | 11.7346 |
| C | -15.4622 | 7.1374  | 8.8386  |
| H | -15.4735 | 7.632   | 7.8597  |
| H | -16.284  | 6.4108  | 8.8482  |
| H | -15.7021 | 7.908   | 9.5764  |
| C | -10.6195 | 10.5514 | 5.5278  |
| C | -10.9399 | 9.1776  | 6.0466  |
| C | -9.9029  | 8.2117  | 5.4275  |
| O | -10.2063 | 7.3756  | 4.5811  |
| O | -8.6401  | 8.4559  | 5.8686  |
| C | -7.6214  | 7.6683  | 5.2393  |
| C | -6.2996  | 7.9907  | 5.9077  |
| O | -12.2698 | 8.882   | 5.6285  |
| H | -11.9003 | 9.6912  | 7.9126  |
| H | -10.765  | 10.8346 | 4.4939  |
| H | -7.843   | 6.6018  | 5.3528  |
| H | -7.572   | 7.9221  | 4.1747  |
| H | -5.4845  | 7.4169  | 5.4581  |
| H | -6.0726  | 9.0582  | 5.8184  |
| H | -6.3444  | 7.7633  | 6.978   |
| H | -12.1928 | 8.2677  | 4.8704  |

Compound 7\_10

Charge = 0 Multiplicity = 1

Symbolic Z-Matrix:

|   |          |         |         |
|---|----------|---------|---------|
| C | -12.3038 | 8.2973  | 10.655  |
| C | -12.2533 | 7.4287  | 11.9118 |
| C | -13.5278 | 6.6383  | 12.1501 |
| C | -13.9716 | 5.8999  | 10.9056 |
| C | -14.1269 | 6.7711  | 9.643   |
| C | -12.8097 | 7.5995  | 9.3577  |
| C | -11.6673 | 6.8714  | 8.5123  |
| C | -12.3072 | 6.1092  | 7.288   |
| C | -13.4509 | 5.1883  | 7.7203  |
| C | -14.5599 | 5.9961  | 8.3715  |
| C | -14.2259 | 4.5813  | 10.992  |
| C | -10.5963 | 7.9174  | 7.9843  |
| C | -11.0896 | 9.0129  | 7.0141  |
| C | -11.1754 | 10.3941 | 7.6333  |
| C | -10.7437 | 11.4449 | 6.6802  |
| C | -10.8618 | 5.8738  | 9.3826  |
| C | -11.3316 | 5.2978  | 6.4211  |
| O | -11.5992 | 10.6393 | 8.7531  |
| O | -10.8992 | 12.7706 | 6.9407  |
| C | -10.4222 | 13.6627 | 5.9423  |
| H | -12.9704 | 9.1441  | 10.8652 |
| H | -11.3181 | 8.7463  | 10.511  |
| H | -11.4064 | 6.7388  | 11.8748 |
| H | -12.0649 | 8.073   | 12.7797 |
| H | -13.3578 | 5.9475  | 12.9856 |
| H | -14.3261 | 7.311   | 12.4837 |
| H | -13.1382 | 8.4197  | 8.7039  |
| H | -12.7531 | 6.8513  | 6.6157  |
| H | -13.8697 | 4.6837  | 6.8401  |
| H | -13.0877 | 4.3946  | 8.3797  |
| H | -14.9291 | 6.7094  | 7.6204  |
| H | -15.4156 | 5.3423  | 8.5824  |
| H | -10.0933 | 8.39    | 8.8361  |
| H | -9.8092  | 7.3285  | 7.5053  |
| H | -10.1224 | 5.3232  | 8.7923  |
| H | -11.4969 | 5.1351  | 9.8745  |
| H | -10.2788 | 6.3941  | 10.1477 |
| H | -11.851  | 4.9037  | 5.5395  |
| H | -10.505  | 5.9061  | 6.0495  |
| H | -10.9198 | 4.4381  | 6.9579  |
| H | -10.6053 | 14.6848 | 6.2866  |
| H | -9.3438  | 13.5437 | 5.793   |
| H | -10.9619 | 13.5211 | 5.      |
| H | -14.5715 | 3.9865  | 10.1554 |
| H | -14.1032 | 4.0438  | 11.9285 |
| C | -15.3034 | 7.7579  | 9.9177  |
| H | -16.2317 | 7.2131  | 10.1296 |
| H | -15.1187 | 8.4275  | 10.7624 |
| H | -15.4914 | 8.4     | 9.0487  |
| C | -10.2326 | 10.7981 | 5.6274  |
| C | -10.1975 | 9.307   | 5.7858  |
| C | -8.7143  | 8.8797  | 5.9528  |
| O | -7.876   | 9.4573  | 6.6309  |
| O | -8.4946  | 7.7213  | 5.2559  |
| C | -7.1604  | 7.2106  | 5.3739  |
| C | -7.0843  | 5.9114  | 4.5963  |
| O | -10.811  | 8.7725  | 4.616   |
| H | -12.1046 | 8.793   | 6.6662  |
| H | -9.8265  | 11.2773 | 4.748   |
| H | -6.4513  | 7.9353  | 4.9588  |
| H | -6.9264  | 7.0242  | 6.428   |
| H | -6.0814  | 5.4794  | 4.655   |
| H | -7.8057  | 5.1861  | 4.9871  |
| H | -7.3376  | 6.0766  | 3.5438  |
| H | -10.4802 | 7.8586  | 4.5245  |

### Compound 7\_11

Charge = 0 Multiplicity = 1

Symbolic Z-Matrix:

|   |          |         |         |
|---|----------|---------|---------|
| C | -12.1693 | 8.2718  | 10.6293 |
| C | -12.0753 | 7.3883  | 11.8731 |
| C | -13.3535 | 6.6228  | 12.167  |
| C | -13.8751 | 5.9082  | 10.9389 |
| C | -14.074  | 6.7968  | 9.6946  |
| C | -12.7545 | 7.5997  | 9.352   |
| C | -11.6725 | 6.8563  | 8.4437  |
| C | -12.3903 | 6.1247  | 7.2443  |
| C | -13.5303 | 5.2225  | 7.7233  |
| C | -14.5873 | 6.0455  | 8.4387  |
| C | -14.1535 | 4.5944  | 11.0244 |
| C | -10.6034 | 7.8824  | 7.8758  |
| C | -11.1116 | 8.9998  | 6.9395  |
| C | -11.1479 | 10.3745 | 7.5776  |
| C | -10.7311 | 11.4287 | 6.6215  |
| C | -10.8488 | 5.8294  | 9.2616  |
| C | -11.478  | 5.3058  | 6.3177  |
| O | -11.5259 | 10.6142 | 8.7148  |
| O | -10.8524 | 12.7537 | 6.9025  |
| C | -10.3949 | 13.649  | 5.8978  |
| H | -12.806  | 9.1302  | 10.8814 |
| H | -11.1825 | 8.7014  | 10.4407 |
| H | -11.2467 | 6.6808  | 11.7866 |
| H | -11.8297 | 8.0185  | 12.737  |
| H | -13.1572 | 5.9191  | 12.9858 |
| H | -14.119  | 7.3086  | 12.5471 |
| H | -13.0966 | 8.4337  | 8.723   |
| H | -12.8541 | 6.8853  | 6.6056  |
| H | -14.0038 | 4.7379  | 6.8596  |
| H | -13.1517 | 4.4131  | 8.3543  |
| H | -14.9788 | 6.775   | 7.7149  |
| H | -15.4451 | 5.4074  | 8.686   |
| H | -10.0476 | 8.3329  | 8.7065  |
| H | -9.8572  | 7.279   | 7.3526  |
| H | -10.1527 | 5.2692  | 8.629   |
| H | -11.4758 | 5.0995  | 9.7763  |
| H | -10.2163 | 6.3265  | 10.0025 |
| H | -12.0512 | 4.9308  | 5.4616  |
| H | -10.662  | 5.904   | 5.9079  |
| H | -11.0533 | 4.4332  | 6.8225  |
| H | -10.5464 | 14.6701 | 6.2601  |
| H | -9.325   | 13.5121 | 5.7083  |
| H | -10.9706 | 13.5286 | 4.9741  |
| H | -14.5533 | 4.0167  | 10.1999 |
| H | -13.996  | 4.0439  | 11.9479 |
| C | -15.2131 | 7.8058  | 10.0381 |
| H | -16.1415 | 7.2788  | 10.2905 |
| H | -14.9716 | 8.4614  | 10.8794 |
| H | -15.4297 | 8.4617  | 9.1863  |
| C | -10.2703 | 10.7854 | 5.5436  |
| C | -10.2574 | 9.2921  | 5.6838  |
| C | -8.7762  | 8.8376  | 5.7954  |
| O | -7.9124  | 9.3853  | 6.4662  |
| O | -8.5956  | 7.6957  | 5.0607  |
| C | -7.2722  | 7.1386  | 5.0907  |
| C | -7.1242  | 6.2094  | 6.281   |
| O | -10.9215 | 8.7831  | 4.5305  |
| H | -12.1422 | 8.8031  | 6.6257  |
| H | -9.8873  | 11.2677 | 4.6556  |
| H | -7.144   | 6.5715  | 4.163   |
| H | -6.5086  | 7.9246  | 5.0962  |
| H | -7.242   | 6.7551  | 7.2225  |
| H | -7.8982  | 5.4351  | 6.2633  |
| H | -6.1423  | 5.728   | 6.2775  |
| H | -10.6052 | 7.8672  | 4.4123  |

## Diastereomer III\_1

Charge = 0 Multiplicity = 1

Symbolic Z-Matrix:

|   |          |         |         |
|---|----------|---------|---------|
| C | -11.4721 | 9.77    | 11.2141 |
| C | -11.3428 | 9.8605  | 9.6938  |
| C | -11.7308 | 11.2188 | 9.135   |
| C | -11.0582 | 12.35   | 9.8831  |
| C | -11.2541 | 12.3377 | 11.4118 |
| C | -10.8406 | 10.9398 | 12.0245 |
| C | -9.2958  | 10.739  | 12.3837 |
| C | -8.7418  | 12.0231 | 13.1119 |
| C | -9.04    | 13.3016 | 12.3254 |
| C | -10.5391 | 13.4876 | 12.1685 |
| C | -10.3841 | 13.2793 | 9.1813  |
| C | -9.0958  | 9.4757  | 13.3211 |
| C | -9.7731  | 9.5292  | 14.7077 |
| C | -10.8828 | 8.5063  | 14.8651 |
| C | -10.7822 | 7.7833  | 16.158  |
| C | -8.4479  | 10.4471 | 11.1209 |
| C | -7.2442  | 12.0015 | 13.4555 |
| O | -11.7837 | 8.3404  | 14.0544 |
| O | -11.6265 | 6.8621  | 16.7106 |
| C | -12.715  | 6.4508  | 15.8921 |
| H | -12.5431 | 9.7323  | 11.4535 |
| H | -11.0817 | 8.8015  | 11.5356 |
| H | -10.3257 | 9.6199  | 9.3744  |
| H | -11.9795 | 9.0918  | 9.2382  |
| H | -11.4788 | 11.2404 | 8.0671  |
| H | -12.8187 | 11.3428 | 9.1818  |
| H | -11.3479 | 10.9082 | 12.9986 |
| H | -9.2644  | 12.126  | 14.0699 |
| H | -8.6447  | 14.1687 | 12.8702 |
| H | -8.5305  | 13.2941 | 11.3574 |
| H | -10.9642 | 13.5757 | 13.1789 |
| H | -10.7413 | 14.4555 | 11.6928 |
| H | -9.4199  | 8.5725  | 12.7913 |
| H | -8.0164  | 9.3357  | 13.4356 |
| H | -7.3807  | 10.3761 | 11.3547 |
| H | -8.5591  | 11.2134 | 10.352  |
| H | -8.7049  | 9.4778  | 10.6846 |
| H | -6.6162  | 12.0433 | 12.5606 |
| H | -6.9868  | 12.8745 | 14.0668 |
| H | -6.9649  | 11.1198 | 14.0361 |
| H | -13.2729 | 5.6851  | 16.4397 |
| H | -13.398  | 7.2844  | 15.7004 |
| H | -12.3602 | 6.      | 14.9596 |
| H | -9.8963  | 14.1316 | 9.6386  |
| H | -10.3039 | 13.2203 | 8.0992  |
| C | -12.7721 | 12.5845 | 11.6737 |
| H | -12.9883 | 12.61   | 12.7486 |
| H | -13.0921 | 13.5453 | 11.2521 |
| H | -13.4167 | 11.811  | 11.247  |
| C | -9.6521  | 8.1994  | 16.7294 |
| C | -8.8779  | 9.1917  | 15.9243 |
| C | -8.5853  | 10.4625 | 16.7547 |
| O | -7.4437  | 10.8707 | 16.9469 |
| O | -9.721   | 11.0518 | 17.2171 |
| C | -9.5409  | 12.2585 | 17.9734 |
| C | -9.4612  | 13.4512 | 17.0386 |
| O | -7.673   | 8.5248  | 15.5618 |
| H | -10.2736 | 10.4897 | 14.8646 |
| H | -9.3022  | 7.8247  | 17.6821 |
| H | -10.4139 | 12.3597 | 18.6264 |
| H | -8.6588  | 12.1946 | 18.6205 |
| H | -9.3951  | 14.3843 | 17.605  |
| H | -8.5877  | 13.3788 | 16.383  |
| H | -10.3427 | 13.4918 | 16.3901 |
| H | -6.9363  | 9.1241  | 15.7997 |

## Diastereomer III\_2

Charge = 0 Multiplicity = 1

Symbolic Z-Matrix:

|   |          |         |         |
|---|----------|---------|---------|
| C | -11.5144 | 9.7801  | 11.2252 |
| C | -11.4206 | 9.8209  | 9.7001  |
| C | -11.778  | 11.174  | 9.1094  |
| C | -11.0499 | 12.3037 | 9.806   |
| C | -11.2076 | 12.3437 | 11.3388 |
| C | -10.8247 | 10.9516 | 11.9842 |
| C | -9.2791  | 10.7101 | 12.3117 |
| C | -8.6664  | 11.9959 | 12.9888 |
| C | -8.9408  | 13.2594 | 12.1698 |
| C | -10.4363 | 13.4912 | 12.0418 |
| C | -10.3632 | 13.1883 | 9.0599  |
| C | -9.0952  | 9.4673  | 13.2791 |
| C | -9.7328  | 9.5788  | 14.6813 |
| C | -10.8799 | 8.6067  | 14.8875 |
| C | -10.7675 | 7.8915  | 16.1836 |
| C | -8.4729  | 10.3554 | 11.0375 |
| C | -7.1627  | 11.9339 | 13.2995 |
| O | -11.8135 | 8.4715  | 14.1089 |
| O | -11.629  | 7.0085  | 16.7708 |
| C | -12.7592 | 6.6351  | 15.9915 |
| H | -12.5797 | 9.7854  | 11.4913 |
| H | -11.1479 | 8.809   | 11.5663 |
| H | -10.4203 | 9.5369  | 9.3637  |
| H | -12.0933 | 9.0606  | 9.2838  |
| H | -11.5525 | 11.1553 | 8.0356  |
| H | -12.8597 | 11.3357 | 9.1789  |
| H | -11.3074 | 10.9662 | 12.9713 |
| H | -9.1623  | 12.1451 | 13.9553 |
| H | -8.5039  | 14.1289 | 12.6778 |
| H | -8.4553  | 13.2054 | 11.1909 |
| H | -10.8338 | 13.6248 | 13.0585 |
| H | -10.6178 | 14.4505 | 11.5408 |
| H | -9.4611  | 8.5607  | 12.7835 |
| H | -8.0179  | 9.2966  | 13.3695 |
| H | -7.4029  | 10.257  | 11.2471 |
| H | -8.5794  | 11.1025 | 10.2493 |
| H | -8.7711  | 9.3829  | 10.6361 |
| H | -6.862   | 12.8164 | 13.8764 |
| H | -6.8997  | 11.0619 | 13.9021 |
| H | -6.5545  | 11.9259 | 12.39   |
| H | -13.3289 | 5.8964  | 16.5635 |
| H | -13.4144 | 7.4939  | 15.8149 |
| H | -12.4533 | 6.1636  | 15.052  |
| H | -9.836   | 14.0367 | 9.4789  |
| H | -10.3123 | 13.0943 | 7.9785  |
| C | -12.7095 | 12.6489 | 11.6296 |
| H | -12.8977 | 12.7137 | 12.7081 |
| H | -13.0084 | 13.6069 | 11.1865 |
| H | -13.3897 | 11.885  | 11.2425 |
| C | -9.6056  | 8.2689  | 16.7166 |
| C | -8.8199  | 9.2258  | 15.8805 |
| C | -8.4672  | 10.495  | 16.6894 |
| O | -7.31    | 10.8723 | 16.849  |
| O | -9.5705  | 11.1202 | 17.1818 |
| C | -9.2929  | 12.3093 | 17.9315 |
| C | -10.6139 | 12.9017 | 18.3814 |
| O | -7.6458  | 8.5161  | 15.4988 |
| H | -10.1868 | 10.5632 | 14.8314 |
| H | -9.2417  | 7.8897  | 17.6623 |
| H | -8.6807  | 12.0595 | 18.8051 |
| H | -8.7606  | 13.0292 | 17.2997 |
| H | -10.4548 | 13.8155 | 18.9606 |
| H | -11.2452 | 13.1354 | 17.5177 |
| H | -11.1683 | 12.1849 | 18.9961 |
| H | -6.8852  | 9.0972  | 15.7043 |

Diastereomer III\_3

Charge = 0 Multiplicity = 1

Symbolic Z-Matrix:

|   |          |         |         |
|---|----------|---------|---------|
| C | -11.2487 | 9.5955  | 11.0774 |
| C | -10.9706 | 9.7127  | 9.5788  |
| C | -11.4931 | 11.0008 | 8.967   |
| C | -11.0794 | 12.2147 | 9.7711  |
| C | -11.4368 | 12.1653 | 11.2697 |
| C | -10.8912 | 10.8417 | 11.9403 |
| C | -9.3838  | 10.8665 | 12.471  |
| C | -9.0954  | 12.2196 | 13.2278 |
| C | -9.5001  | 13.4406 | 12.3984 |
| C | -10.9853 | 13.4031 | 12.0868 |
| C | -10.4791 | 13.2377 | 9.1357  |
| C | -9.1118  | 9.6482  | 13.4516 |
| C | -9.9499  | 9.5903  | 14.7491 |
| C | -10.948  | 8.4453  | 14.7506 |
| C | -10.9025 | 7.6767  | 16.0183 |
| C | -8.3693  | 10.692  | 11.3133 |
| C | -7.6471  | 12.4219 | 13.7016 |
| O | -11.7288 | 8.2133  | 13.8381 |
| O | -11.6827 | 6.6368  | 16.4387 |
| C | -12.6857 | 6.2058  | 15.5269 |
| H | -12.3216 | 9.396   | 11.1997 |
| H | -10.7534 | 8.6949  | 11.4485 |
| H | -9.9006  | 9.6281  | 9.3732  |
| H | -11.4328 | 8.8602  | 9.0656  |
| H | -11.1336 | 11.0654 | 7.9322  |
| H | -12.586  | 10.9619 | 8.8956  |
| H | -11.4923 | 10.7329 | 12.8535 |
| H | -9.7123  | 12.2449 | 14.1338 |
| H | -9.2947  | 14.356  | 12.9684 |
| H | -8.8986  | 13.5103 | 11.4872 |
| H | -11.5216 | 13.4197 | 13.0467 |
| H | -11.2787 | 14.3332 | 11.5838 |
| H | -9.229   | 8.7063  | 12.9027 |
| H | -8.046   | 9.6756  | 13.6972 |
| H | -7.3347  | 10.7684 | 11.663  |
| H | -8.4997  | 11.4353 | 10.5247 |
| H | -8.4411  | 9.696   | 10.8676 |
| H | -7.5813  | 13.3153 | 14.3335 |
| H | -7.2842  | 11.5846 | 14.3004 |
| H | -6.9586  | 12.5738 | 12.8647 |
| H | -13.2252 | 5.3756  | 15.9931 |
| H | -13.4096 | 7.0035  | 15.332  |
| H | -12.2402 | 5.8323  | 14.5994 |
| H | -10.1773 | 14.1514 | 9.6331  |
| H | -10.2753 | 13.1971 | 8.069   |
| C | -12.994  | 12.1839 | 11.3627 |
| H | -13.3275 | 12.1739 | 12.4074 |
| H | -13.4044 | 13.0881 | 10.8963 |
| H | -13.467  | 11.3247 | 10.8789 |
| C | -9.9     | 8.194   | 16.7274 |
| C | -9.1685  | 9.3119  | 16.0578 |
| C | -9.2277  | 10.5739 | 16.9568 |
| O | -10.2158 | 10.9818 | 17.5518 |
| O | -8.0093  | 11.1978 | 16.9432 |
| C | -7.9575  | 12.3974 | 17.7266 |
| C | -6.5422  | 12.938  | 17.6693 |
| O | -7.853   | 8.8215  | 15.8448 |
| H | -10.5643 | 10.489  | 14.8696 |
| H | -9.6184  | 7.8207  | 17.7031 |
| H | -8.6536  | 13.1351 | 17.3124 |
| H | -8.2266  | 12.1756 | 18.7654 |
| H | -6.4524  | 13.8588 | 18.2524 |
| H | -5.8326  | 12.2012 | 18.06   |
| H | -6.2486  | 13.1443 | 16.635  |
| H | -7.2569  | 9.594   | 15.8855 |



## Diastereomer III\_4

Charge = 0 Multiplicity = 1

Symbolic Z-Matrix:

|   |          |         |         |
|---|----------|---------|---------|
| C | -11.4883 | 9.7231  | 11.1706 |
| C | -11.3636 | 9.7374  | 9.6472  |
| C | -11.747  | 11.0681 | 9.0228  |
| C | -11.0663 | 12.2315 | 9.7119  |
| C | -11.2575 | 12.2962 | 11.24   |
| C | -10.8487 | 10.9284 | 11.9205 |
| C | -9.3041  | 10.7383 | 12.2843 |
| C | -8.7434  | 12.0538 | 12.949  |
| C | -9.0361  | 13.2931 | 12.0998 |
| C | -10.5346 | 13.4789 | 11.936  |
| C | -10.3896 | 13.1212 | 8.9629  |
| C | -9.1045  | 9.5196  | 13.2788 |
| C | -9.7737  | 9.6371  | 14.6659 |
| C | -10.8978 | 8.6365  | 14.8637 |
| C | -10.7868 | 7.9348  | 16.1671 |
| C | -8.4613  | 10.3838 | 11.0339 |
| C | -7.2456  | 12.0415 | 13.2926 |
| O | -11.8151 | 8.4697  | 14.0717 |
| O | -11.6314 | 7.0302  | 16.746  |
| C | -12.7337 | 6.6141  | 15.9487 |
| H | -12.5588 | 9.7026  | 11.4146 |
| H | -11.1016 | 8.7697  | 11.5382 |
| H | -10.3487 | 9.4762  | 9.3372  |
| H | -12.0053 | 8.9502  | 9.2323  |
| H | -11.4983 | 11.0354 | 7.9545  |
| H | -12.8341 | 11.1997 | 9.0668  |
| H | -11.352  | 10.9478 | 12.8972 |
| H | -9.2643  | 12.2066 | 13.9017 |
| H | -8.6353  | 14.1844 | 12.5997 |
| H | -8.5284  | 13.2347 | 11.1325 |
| H | -10.9574 | 13.6206 | 12.9412 |
| H | -10.7326 | 14.4227 | 11.4123 |
| H | -9.4335  | 8.5936  | 12.793  |
| H | -8.0248  | 9.3823  | 13.3936 |
| H | -7.3935  | 10.3209 | 11.2672 |
| H | -8.5729  | 11.1125 | 10.2294 |
| H | -8.7226  | 9.3956  | 10.6453 |
| H | -6.9827  | 12.9436 | 13.8575 |
| H | -6.9712  | 11.1897 | 13.9186 |
| H | -6.6178  | 12.033  | 12.3966 |
| H | -13.2895 | 5.861   | 16.5158 |
| H | -13.4133 | 7.4495  | 15.7533 |
| H | -12.3948 | 6.1462  | 15.0187 |
| H | -9.8957  | 13.9924 | 9.3758  |
| H | -10.3131 | 13.0081 | 7.8847  |
| C | -12.7735 | 12.563  | 11.4937 |
| H | -12.9862 | 12.6429 | 12.5666 |
| H | -13.0902 | 13.5033 | 11.0258 |
| H | -13.4231 | 11.7725 | 11.1077 |
| C | -9.6471  | 8.3521  | 16.7179 |
| C | -8.8769  | 9.3277  | 15.889  |
| C | -8.5866  | 10.6166 | 16.6919 |
| O | -7.4468  | 11.0396 | 16.862  |
| O | -9.7216  | 11.1966 | 17.1678 |
| C | -9.5417  | 12.4003 | 17.9291 |
| C | -9.2848  | 12.0627 | 19.3855 |
| O | -7.6701  | 8.656   | 15.542  |
| H | -10.2565 | 10.6112 | 14.791  |
| H | -9.2892  | 7.9922  | 17.6733 |
| H | -8.7388  | 13.0186 | 17.5117 |
| H | -10.4693 | 12.9753 | 17.8417 |
| H | -9.2042  | 12.973  | 19.9863 |
| H | -10.0958 | 11.4455 | 19.7857 |
| H | -8.3611  | 11.4864 | 19.4982 |
| H | -6.9362  | 9.2711  | 15.7458 |

## Diastereomer III\_5

Charge = 0 Multiplicity = 1

Symbolic Z-Matrix:

|   |          |         |         |
|---|----------|---------|---------|
| C | -11.9688 | 10.7696 | 11.9802 |
| C | -12.3425 | 10.9235 | 10.5057 |
| C | -12.0937 | 12.3194 | 9.9539  |
| C | -10.7241 | 12.8512 | 10.3235 |
| C | -10.3793 | 12.7977 | 11.8217 |
| C | -10.5802 | 11.339  | 12.3851 |
| C | -9.3678  | 10.311  | 12.2065 |
| C | -8.0249  | 11.0192 | 12.6137 |
| C | -7.8349  | 12.3605 | 11.8926 |
| C | -8.9699  | 13.3179 | 12.2047 |
| C | -9.9364  | 13.3511 | 9.3544  |
| C | -9.6068  | 9.0017  | 13.0735 |
| C | -10.121  | 9.13    | 14.5227 |
| C | -10.6541 | 7.8046  | 15.0397 |
| C | -10.2479 | 7.5682  | 16.4475 |
| C | -9.2412  | 9.8023  | 10.7462 |
| C | -6.7418  | 10.1972 | 12.4007 |
| O | -11.3815 | 7.0583  | 14.3983 |
| O | -10.611  | 6.57    | 17.3063 |
| C | -11.4251 | 5.5435  | 16.7514 |
| H | -12.7343 | 11.2872 | 12.5732 |
| H | -12.0686 | 9.7175  | 12.2624 |
| H | -11.8056 | 10.1968 | 9.8915  |
| H | -13.4043 | 10.6757 | 10.3823 |
| H | -12.2295 | 12.2914 | 8.8653  |
| H | -12.8631 | 13.005  | 10.3269 |
| H | -10.638  | 11.4933 | 13.4704 |
| H | -8.0812  | 11.2469 | 13.682  |
| H | -6.8982  | 12.8249 | 12.2278 |
| H | -7.7265  | 12.213  | 10.8138 |
| H | -8.9382  | 13.5132 | 13.2866 |
| H | -8.7701  | 14.2896 | 11.7356 |
| H | -10.3455 | 8.3937  | 12.5325 |
| H | -8.7148  | 8.3656  | 13.06   |
| H | -8.3822  | 9.1334  | 10.627  |
| H | -9.1257  | 10.6105 | 10.0228 |
| H | -10.1048 | 9.2018  | 10.4509 |
| H | -5.8906  | 10.7055 | 12.8689 |
| H | -6.7958  | 9.2009  | 12.842  |
| H | -6.5002  | 10.0858 | 11.3387 |
| H | -11.6031 | 4.7998  | 17.5341 |
| H | -12.398  | 5.9386  | 16.4424 |
| H | -10.9155 | 5.0393  | 15.924  |
| H | -8.9552  | 13.7694 | 9.5445  |
| H | -10.2579 | 13.3644 | 8.3164  |
| C | -11.3591 | 13.775  | 12.5443 |
| H | -11.1717 | 13.7961 | 13.6246 |
| H | -11.237  | 14.7991 | 12.1705 |
| H | -12.4119 | 13.5074 | 12.4191 |
| C | -9.4005  | 8.5503  | 16.7552 |
| C | -9.1269  | 9.5088  | 15.6381 |
| C | -9.3249  | 10.9528 | 16.1548 |
| O | -8.3817  | 11.71   | 16.3666 |
| O | -10.6316 | 11.255  | 16.3773 |
| C | -10.8625 | 12.5905 | 16.8427 |
| C | -12.3602 | 12.8211 | 16.8835 |
| O | -7.7776  | 9.2623  | 15.264  |
| H | -11.0092 | 9.7693  | 14.5432 |
| H | -8.9167  | 8.6252  | 17.7203 |
| H | -10.4388 | 12.7041 | 17.8464 |
| H | -10.398  | 13.3118 | 16.1608 |
| H | -12.5905 | 13.83   | 17.2368 |
| H | -12.7971 | 12.6863 | 15.8882 |
| H | -12.8445 | 12.095  | 17.5448 |
| H | -7.2363  | 9.9612  | 15.6834 |

Diastereomer III\_6

Charge = 0 Multiplicity = 1

Symbolic Z-Matrix:

|   |          |         |         |
|---|----------|---------|---------|
| C | -11.4517 | 9.7259  | 11.2152 |
| C | -11.2913 | 9.8112  | 9.6973  |
| C | -11.6931 | 11.1584 | 9.1222  |
| C | -11.0601 | 12.3065 | 9.8791  |
| C | -11.2916 | 12.2981 | 11.4027 |
| C | -10.8642 | 10.9136 | 12.0334 |
| C | -9.3252  | 10.7431 | 12.4337 |
| C | -8.7979  | 12.0451 | 13.1487 |
| C | -9.1182  | 13.3113 | 12.3512 |
| C | -10.6175 | 13.4638 | 12.1709 |
| C | -10.3908 | 13.2467 | 9.1873  |
| C | -9.1317  | 9.5015  | 13.4026 |
| C | -9.8737  | 9.5514  | 14.7602 |
| C | -10.9459 | 8.4775  | 14.839  |
| C | -10.7675 | 7.5984  | 16.0188 |
| C | -8.4463  | 10.4368 | 11.1953 |
| C | -7.2965  | 12.0595 | 13.4804 |
| O | -11.8626 | 8.3699  | 14.0359 |
| O | -11.5094 | 6.5279  | 16.4311 |
| C | -12.6233 | 6.1926  | 15.6126 |
| H | -12.5267 | 9.6656  | 11.431  |
| H | -11.0462 | 8.7682  | 11.5508 |
| H | -10.2631 | 9.5891  | 9.4007  |
| H | -11.9027 | 9.0276  | 9.2325  |
| H | -11.4173 | 11.1795 | 8.0603  |
| H | -12.784  | 11.261  | 9.1437  |
| H | -11.3958 | 10.8794 | 12.9939 |
| H | -9.3199  | 12.1424 | 14.108  |
| H | -8.7496  | 14.1905 | 12.8956 |
| H | -8.5951  | 13.3091 | 11.3903 |
| H | -11.0614 | 13.5426 | 13.1739 |
| H | -10.8333 | 14.4263 | 11.69   |
| H | -9.4121  | 8.5847  | 12.8701 |
| H | -8.056   | 9.3844  | 13.5614 |
| H | -7.3848  | 10.3706 | 11.4547 |
| H | -8.5426  | 11.1938 | 10.4149 |
| H | -8.6894  | 9.4609  | 10.7659 |
| H | -7.0519  | 12.9401 | 14.0853 |
| H | -6.99    | 11.1862 | 14.0582 |
| H | -6.6775  | 12.1145 | 12.5797 |
| H | -13.3542 | 7.0072  | 15.5903 |
| H | -12.3015 | 5.9144  | 14.6039 |
| H | -13.1127 | 5.3204  | 16.0567 |
| H | -9.9338  | 14.1128 | 9.6504  |
| H | -10.2857 | 13.1842 | 8.1075  |
| C | -12.8199 | 12.5159 | 11.6277 |
| H | -13.0616 | 12.5449 | 12.6971 |
| H | -13.1494 | 13.4669 | 11.1914 |
| H | -13.4386 | 11.7262 | 11.1923 |
| C | -9.6903  | 8.0526  | 16.6573 |
| C | -9.0378  | 9.24    | 16.0279 |
| C | -9.1238  | 10.4516 | 16.9933 |
| O | -10.0431 | 10.6867 | 17.7651 |
| O | -8.0308  | 11.2556 | 16.8053 |
| C | -7.9752  | 12.4257 | 17.6369 |
| C | -8.7659  | 13.5603 | 17.0124 |
| O | -7.7025  | 8.84    | 15.7599 |
| H | -10.4087 | 10.4975 | 14.8957 |
| H | -9.3127  | 7.6009  | 17.5652 |
| H | -8.3242  | 12.2047 | 18.6522 |
| H | -6.9212  | 12.7116 | 17.715  |
| H | -9.8212  | 13.2929 | 16.9002 |
| H | -8.6972  | 14.4631 | 17.6259 |
| H | -8.388   | 13.7881 | 16.011  |
| H | -7.1664  | 9.6552  | 15.7347 |

## Diastereomer III\_7

Charge = 0 Multiplicity = 1

Symbolic Z-Matrix:

|   |          |         |         |
|---|----------|---------|---------|
| C | -11.3136 | 9.6054  | 11.082  |
| C | -11.0703 | 9.6806  | 9.5747  |
| C | -11.5549 | 10.977  | 8.9491  |
| C | -11.0709 | 12.1886 | 9.7166  |
| C | -11.3907 | 12.1842 | 11.2244 |
| C | -10.8824 | 10.8529 | 11.9086 |
| C | -9.3616  | 10.8256 | 12.4004 |
| C | -8.996   | 12.1807 | 13.1194 |
| C | -9.3741  | 13.4004 | 12.2757 |
| C | -10.8675 | 13.4179 | 12.0041 |
| C | -10.4463 | 13.173  | 9.0447  |
| C | -9.1164  | 9.6184  | 13.4013 |
| C | -9.9257  | 9.6252  | 14.7187 |
| C | -10.9521 | 8.5068  | 14.7739 |
| C | -10.8864 | 7.7607  | 16.0539 |
| C | -8.3861  | 10.5832 | 11.2216 |
| C | -7.5269  | 12.3322 | 13.5462 |
| O | -11.7651 | 8.2778  | 13.8892 |
| O | -11.6734 | 6.7429  | 16.5137 |
| C | -12.7092 | 6.3153  | 15.6377 |
| H | -12.3902 | 9.4533  | 11.2358 |
| H | -10.8464 | 8.6926  | 11.4598 |
| H | -10.0104 | 9.5471  | 9.3437  |
| H | -11.5807 | 8.8381  | 9.0915  |
| H | -11.22   | 11.0056 | 7.9044  |
| H | -12.6499 | 10.9823 | 8.9059  |
| H | -11.464  | 10.7871 | 12.8383 |
| H | -9.5845  | 12.2494 | 14.042  |
| H | -9.1162  | 14.3177 | 12.8207 |
| H | -8.7954  | 13.4272 | 11.3476 |
| H | -11.3765 | 13.475  | 12.9771 |
| H | -11.1363 | 14.3493 | 11.4899 |
| H | -9.2874  | 8.6713  | 12.876  |
| H | -8.0446  | 9.6032  | 13.62   |
| H | -7.3404  | 10.6222 | 11.5434 |
| H | -8.5054  | 11.3149 | 10.4205 |
| H | -8.5118  | 9.5821  | 10.8001 |
| H | -7.4063  | 13.2307 | 14.1628 |
| H | -7.1781  | 11.4894 | 14.1456 |
| H | -6.8594  | 12.4452 | 12.6863 |
| H | -13.2502 | 5.503   | 16.1328 |
| H | -13.4238 | 7.1229  | 15.4493 |
| H | -12.2968 | 5.9184  | 14.7046 |
| H | -10.0947 | 14.0833 | 9.5149  |
| H | -10.2723 | 13.1026 | 7.9743  |
| C | -12.9428 | 12.2695 | 11.3563 |
| H | -13.249  | 12.2942 | 12.4091 |
| H | -13.3277 | 13.1804 | 10.8816 |
| H | -13.4632 | 11.4212 | 10.9029 |
| C | -9.8576  | 8.2736  | 16.7275 |
| C | -9.126   | 9.3682  | 16.0206 |
| C | -9.157   | 10.6527 | 16.8892 |
| O | -10.1196 | 11.062  | 17.5232 |
| O | -7.9487  | 11.2894 | 16.7947 |
| C | -7.8357  | 12.5215 | 17.524  |
| C | -7.4208  | 12.2449 | 18.9565 |
| O | -7.8182  | 8.8611  | 15.8001 |
| H | -10.5146 | 10.543  | 14.8228 |
| H | -9.5582  | 7.9146  | 17.7033 |
| H | -7.064   | 13.1172 | 17.0255 |
| H | -8.7666  | 13.0979 | 17.4777 |
| H | -7.2738  | 13.1796 | 19.505  |
| H | -8.1774  | 11.6496 | 19.4772 |
| H | -6.4896  | 11.6695 | 18.9826 |
| H | -7.2182  | 9.6313  | 15.7901 |

## Diastereomer III\_8

Charge = 0 Multiplicity = 1

Symbolic Z-Matrix:

|   |          |         |         |
|---|----------|---------|---------|
| C | -11.4649 | 9.8474  | 11.1244 |
| C | -11.3052 | 9.9518  | 9.6078  |
| C | -11.6559 | 11.3235 | 9.0572  |
| C | -10.9754 | 12.4331 | 9.8303  |
| C | -11.2005 | 12.4078 | 11.3549 |
| C | -10.8258 | 10.9955 | 11.9594 |
| C | -9.2923  | 10.76   | 12.3446 |
| C | -8.7271  | 12.0251 | 13.0974 |
| C | -8.9856  | 13.3178 | 12.3202 |
| C | -10.4776 | 13.5349 | 12.1378 |
| C | -10.2704 | 13.3567 | 9.1517  |
| C | -9.1344  | 9.4823  | 13.2708 |
| C | -9.8373  | 9.5321  | 14.6444 |
| C | -10.9767 | 8.5405  | 14.7619 |
| C | -10.918  | 7.7741  | 16.0298 |
| C | -8.4267  | 10.4656 | 11.0945 |
| C | -7.2367  | 11.9705 | 13.4679 |
| O | -11.8779 | 8.4156  | 13.9442 |
| O | -11.8872 | 6.8883  | 16.3858 |
| C | -11.6769 | 6.1859  | 17.6034 |
| H | -12.5407 | 9.8285  | 11.3433 |
| H | -11.0998 | 8.8678  | 11.4422 |
| H | -10.2873 | 9.6945  | 9.3046  |
| H | -11.9482 | 9.2009  | 9.1318  |
| H | -11.3835 | 11.3517 | 7.9946  |
| H | -12.7419 | 11.4685 | 9.0852  |
| H | -11.3512 | 10.9636 | 12.9239 |
| H | -9.2649  | 12.1277 | 14.047  |
| H | -8.5838  | 14.1709 | 12.882  |
| H | -8.4584  | 13.3109 | 11.3617 |
| H | -10.9198 | 13.6202 | 13.1411 |
| H | -10.652  | 14.5119 | 11.6695 |
| H | -9.4651  | 8.5916  | 12.7242 |
| H | -8.0603  | 9.3209  | 13.4046 |
| H | -7.3657  | 10.3711 | 11.3472 |
| H | -8.5086  | 11.2425 | 10.3325 |
| H | -8.6942  | 9.5066  | 10.6423 |
| H | -6.9742  | 12.8309 | 14.0948 |
| H | -6.9848  | 11.0766 | 14.0421 |
| H | -6.5917  | 12.0113 | 12.585  |
| H | -12.5237 | 5.51    | 17.7547 |
| H | -10.7652 | 5.5811  | 17.5549 |
| H | -11.6391 | 6.8765  | 18.4525 |
| H | -9.775   | 14.1942 | 9.6276  |
| H | -10.1713 | 13.3078 | 8.0706  |
| C | -12.718  | 12.6816 | 11.5913 |
| H | -12.9539 | 12.6995 | 12.6622 |
| H | -13.0112 | 13.6531 | 11.1747 |
| H | -13.3695 | 11.9257 | 11.1439 |
| C | -9.7861  | 8.1428  | 16.6379 |
| C | -8.9785  | 9.1438  | 15.8719 |
| C | -8.6826  | 10.3925 | 16.7345 |
| O | -7.5424  | 10.8071 | 16.9198 |
| O | -9.8169  | 10.9603 | 17.2265 |
| C | -9.6377  | 12.1574 | 17.9984 |
| C | -9.5802  | 13.3646 | 17.0807 |
| O | -7.7755  | 8.4641  | 15.5277 |
| H | -10.3112 | 10.5044 | 14.8109 |
| H | -9.4382  | 7.7475  | 17.5817 |
| H | -10.503  | 12.241  | 18.6639 |
| H | -8.7467  | 12.0913 | 18.6333 |
| H | -9.5156  | 14.2897 | 17.6603 |
| H | -8.7142  | 13.3102 | 16.4135 |
| H | -10.4699 | 13.4066 | 16.4437 |
| H | -7.0439  | 9.1004  | 15.661  |

Diastereomer III\_9

Charge = 0 Multiplicity = 1

Symbolic Z-Matrix:

|   |          |         |         |
|---|----------|---------|---------|
| C | -11.5203 | 9.8635  | 11.1402 |
| C | -11.402  | 9.9105  | 9.617   |
| C | -11.7139 | 11.2761 | 9.0294  |
| C | -10.9667 | 12.382  | 9.7438  |
| C | -11.1472 | 12.4171 | 11.2743 |
| C | -10.8113 | 11.0117 | 11.9168 |
| C | -9.2779  | 10.7269 | 12.2661 |
| C | -8.6418  | 11.9919 | 12.9605 |
| C | -8.8701  | 13.2673 | 12.1456 |
| C | -10.3568 | 13.5396 | 11.9963 |
| C | -10.2454 | 13.2524 | 9.0138  |
| C | -9.1416  | 9.4735  | 13.2279 |
| C | -9.799   | 9.5911  | 14.6202 |
| C | -10.9794 | 8.6563  | 14.7925 |
| C | -10.9046 | 7.891   | 16.0599 |
| C | -8.462   | 10.3587 | 11.0019 |
| C | -7.145   | 11.8884 | 13.2928 |
| O | -11.9185 | 8.5708  | 14.0133 |
| O | -11.894  | 7.0444  | 16.4539 |
| C | -11.669  | 6.34    | 17.6676 |
| H | -12.5891 | 9.896   | 11.39   |
| H | -11.1854 | 8.8809  | 11.4811 |
| H | -10.4046 | 9.6016  | 9.2941  |
| H | -12.0883 | 9.171   | 9.1859  |
| H | -11.4724 | 11.2575 | 7.959   |
| H | -12.7918 | 11.4663 | 9.0832  |
| H | -11.3079 | 11.0338 | 12.8968 |
| H | -9.148   | 12.1482 | 13.9205 |
| H | -8.4182  | 14.1217 | 12.6658 |
| H | -8.3713  | 13.2063 | 11.1739 |
| H | -10.7662 | 13.6776 | 13.0075 |
| H | -10.505  | 14.5062 | 11.4986 |
| H | -9.5225  | 8.5799  | 12.7199 |
| H | -8.0708  | 9.2746  | 13.3342 |
| H | -7.3983  | 10.2304 | 11.227  |
| H | -8.5364  | 11.1132 | 10.217  |
| H | -8.7797  | 9.397   | 10.5896 |
| H | -6.8297  | 12.7594 | 13.8795 |
| H | -6.9142  | 11.0065 | 13.8939 |
| H | -6.5238  | 11.8696 | 12.3924 |
| H | -12.5355 | 5.6981  | 17.852  |
| H | -10.7835 | 5.7     | 17.5913 |
| H | -11.5752 | 7.0325  | 18.5108 |
| H | -9.7026  | 14.0841 | 9.4461  |
| H | -10.1805 | 13.1632 | 7.9327  |
| C | -12.6449 | 12.7605 | 11.5439 |
| H | -12.848  | 12.8239 | 12.6198 |
| H | -12.9112 | 13.7287 | 11.1023 |
| H | -13.339  | 12.0174 | 11.1416 |
| C | -9.7386  | 8.2172  | 16.6259 |
| C | -8.9225  | 9.1882  | 15.8309 |
| C | -8.5723  | 10.435  | 16.6757 |
| O | -7.4194  | 10.8306 | 16.8201 |
| O | -9.6759  | 11.0237 | 17.211  |
| C | -9.4047  | 12.1987 | 17.9851 |
| C | -10.7258 | 12.7481 | 18.4861 |
| O | -7.7467  | 8.4728  | 15.4664 |
| H | -10.2199 | 10.589  | 14.7778 |
| H | -9.3732  | 7.8118  | 17.5588 |
| H | -8.7635  | 11.9401 | 18.835  |
| H | -8.906   | 12.9471 | 17.359  |
| H | -10.5716 | 13.6497 | 19.0855 |
| H | -11.3856 | 12.99   | 17.6463 |
| H | -11.247  | 12.0026 | 19.0958 |
| H | -6.9972  | 9.0954  | 15.5594 |

Diastereomer III\_10

Charge = 0 Multiplicity = 1

Symbolic Z-Matrix:

|   |          |         |         |
|---|----------|---------|---------|
| C | -11.9861 | 10.6894 | 11.899  |
| C | -12.2975 | 10.759  | 10.4036 |
| C | -12.0757 | 12.1352 | 9.7917  |
| C | -10.756  | 12.7541 | 10.2065 |
| C | -10.4901 | 12.7822 | 11.721  |
| C | -10.6439 | 11.3387 | 12.3359 |
| C | -9.3748  | 10.3673 | 12.2399 |
| C | -8.0905  | 11.1519 | 12.6914 |
| C | -7.9336  | 12.4857 | 11.947  |
| C | -9.1328  | 13.3898 | 12.1596 |
| C | -9.9449  | 13.2576 | 9.2588  |
| C | -9.5899  | 9.0675  | 13.1263 |
| C | -10.1187 | 9.2046  | 14.5715 |
| C | -10.739  | 7.8957  | 15.0348 |
| C | -10.2522 | 7.4983  | 16.378  |
| C | -9.1512  | 9.8289  | 10.8016 |
| C | -6.7586  | 10.3944 | 12.5427 |
| O | -11.5777 | 7.2734  | 14.396  |
| O | -10.6044 | 6.4314  | 17.155  |
| C | -11.4995 | 5.5004  | 16.5581 |
| H | -12.7997 | 11.1987 | 12.432  |
| H | -12.0549 | 9.6489  | 12.2286 |
| H | -11.7087 | 10.0241 | 9.8503  |
| H | -13.3428 | 10.4645 | 10.2465 |
| H | -12.1467 | 12.0447 | 8.7003  |
| H | -12.8957 | 12.8019 | 10.0832 |
| H | -10.7523 | 11.531  | 13.4118 |
| H | -8.2079  | 11.3931 | 13.7532 |
| H | -7.044   | 13.0084 | 12.3224 |
| H | -7.7534  | 12.3177 | 10.8807 |
| H | -9.172   | 13.6241 | 13.2334 |
| H | -8.9576  | 14.3534 | 11.6647 |
| H | -10.3028 | 8.4318  | 12.583  |
| H | -8.6807  | 8.4555  | 13.1295 |
| H | -8.2555  | 9.2011  | 10.743  |
| H | -9.037   | 10.6221 | 10.0622 |
| H | -9.9676  | 9.1776  | 10.4817 |
| H | -5.9607  | 10.9366 | 13.0636 |
| H | -6.7877  | 9.3885  | 12.9633 |
| H | -6.4537  | 10.3099 | 11.4943 |
| H | -11.6511 | 4.6817  | 17.2683 |
| H | -12.4748 | 5.9603  | 16.3701 |
| H | -11.0744 | 5.0729  | 15.6443 |
| H | -8.9992  | 13.7369 | 9.4822  |
| H | -10.2105 | 13.2119 | 8.2061  |
| C | -11.5565 | 13.7384 | 12.3404 |
| H | -11.4304 | 13.8218 | 13.4253 |
| H | -11.4657 | 14.7488 | 11.9227 |
| H | -12.5863 | 13.4107 | 12.1736 |
| C | -9.3462  | 8.4111  | 16.7265 |
| C | -9.1138  | 9.483   | 15.7089 |
| C | -9.3503  | 10.8649 | 16.3613 |
| O | -8.4514  | 11.6905 | 16.4928 |
| O | -10.6328 | 11.0234 | 16.7869 |
| C | -10.9277 | 12.2626 | 17.4487 |
| C | -11.2829 | 13.3268 | 16.4287 |
| O | -7.7634  | 9.3169  | 15.3018 |
| H | -10.9591 | 9.9042  | 14.6068 |
| H | -8.8021  | 8.3696  | 17.661  |
| H | -11.7855 | 12.0788 | 18.1039 |
| H | -10.0956 | 12.5795 | 18.0877 |
| H | -11.5712 | 14.2585 | 16.9234 |
| H | -10.4369 | 13.5312 | 15.7651 |
| H | -12.1111 | 12.9908 | 15.7962 |
| H | -7.272   | 10.0998 | 15.6236 |

## Diastereomer III\_11

Charge = 0 Multiplicity = 1

Symbolic Z-Matrix:

|   |          |         |         |
|---|----------|---------|---------|
| C | -11.2394 | 9.6697  | 10.9911 |
| C | -10.9338 | 9.7993  | 9.4989  |
| C | -11.4246 | 11.1029 | 8.8935  |
| C | -11.0047 | 12.3006 | 9.7186  |
| C | -11.3888 | 12.2396 | 11.2103 |
| C | -10.8763 | 10.8997 | 11.8746 |
| C | -9.3782  | 10.8928 | 12.431  |
| C | -9.0802  | 12.2325 | 13.2078 |
| C | -9.4511  | 13.4694 | 12.3861 |
| C | -10.9313 | 13.4602 | 12.0495 |
| C | -10.3771 | 13.3208 | 9.1055  |
| C | -9.1423  | 9.6589  | 13.4019 |
| C | -10.0041 | 9.5961  | 14.6837 |
| C | -11.0298 | 8.4793  | 14.6395 |
| C | -11.0133 | 7.6559  | 15.8702 |
| C | -8.3472  | 10.7145 | 11.2884 |
| C | -7.6367  | 12.4059 | 13.7066 |
| O | -11.8181 | 8.293   | 13.7229 |
| O | -11.8991 | 6.6445  | 16.0777 |
| C | -11.7609 | 5.9334  | 17.3006 |
| H | -12.3174 | 9.4868  | 11.0926 |
| H | -10.7654 | 8.7567  | 11.36   |
| H | -9.862   | 9.6993  | 9.3102  |
| H | -11.4012 | 8.9606  | 8.9679  |
| H | -11.0465 | 11.1733 | 7.8657  |
| H | -12.5166 | 11.083  | 8.8032  |
| H | -11.4942 | 10.7913 | 12.7766 |
| H | -9.7113  | 12.2576 | 14.104  |
| H | -9.2405  | 14.3747 | 12.9702 |
| H | -8.8333  | 13.5397 | 11.486  |
| H | -11.4834 | 13.4744 | 13.0004 |
| H | -11.2008 | 14.4007 | 11.5527 |
| H | -9.2633  | 8.7255  | 12.8392 |
| H | -8.081   | 9.668   | 13.6667 |
| H | -7.3175  | 10.7689 | 11.6563 |
| H | -8.4515  | 11.4691 | 10.5067 |
| H | -8.4282  | 9.7251  | 10.8297 |
| H | -7.5664  | 13.2928 | 14.3471 |
| H | -7.2979  | 11.5575 | 14.3039 |
| H | -6.9321  | 12.5534 | 12.8824 |
| H | -10.7843 | 5.4415  | 17.3598 |
| H | -11.9138 | 6.5962  | 18.1589 |
| H | -12.5323 | 5.1582  | 17.3302 |
| H | -10.0692 | 14.2236 | 9.6186  |
| H | -10.1559 | 13.2889 | 8.042   |
| C | -12.9468 | 12.2829 | 11.2769 |
| H | -13.2983 | 12.2664 | 12.3157 |
| H | -13.3342 | 13.199  | 10.8143 |
| H | -13.4254 | 11.4372 | 10.7752 |
| C | -10.0089 | 8.1234  | 16.6168 |
| C | -9.2558  | 9.2606  | 15.9985 |
| C | -9.3204  | 10.4884 | 16.9432 |
| O | -10.2971 | 10.8421 | 17.5894 |
| O | -8.1216  | 11.1482 | 16.9118 |
| C | -8.0751  | 12.3177 | 17.74   |
| C | -6.6677  | 12.8788 | 17.6877 |
| O | -7.9379  | 8.7678  | 15.8052 |
| H | -10.5941 | 10.509  | 14.8172 |
| H | -9.7251  | 7.7254  | 17.5809 |
| H | -8.7861  | 13.0602 | 17.3614 |
| H | -8.3284  | 12.0546 | 18.7731 |
| H | -6.3883  | 13.1286 | 16.6592 |
| H | -6.583   | 13.7777 | 18.3047 |
| H | -5.9442  | 12.1371 | 18.0421 |
| H | -7.3459  | 9.5444  | 15.8104 |



## Diastereomer III\_12

Charge = 0 Multiplicity = 1

Symbolic Z-Matrix:

|   |          |         |         |
|---|----------|---------|---------|
| C | -11.9757 | 10.6836 | 11.8735 |
| C | -12.3197 | 10.7994 | 10.3883 |
| C | -12.1013 | 12.1925 | 9.817   |
| C | -10.7568 | 12.7717 | 10.2063 |
| C | -10.444  | 12.756  | 11.7124 |
| C | -10.6146 | 11.3024 | 12.2992 |
| C | -9.3687  | 10.3084 | 12.1683 |
| C | -8.0572  | 11.0648 | 12.5909 |
| C | -7.8901  | 12.3964 | 11.8466 |
| C | -9.0593  | 13.3254 | 12.1151 |
| C | -9.9628  | 13.277  | 9.245   |
| C | -9.5886  | 9.0094  | 13.0558 |
| C | -10.1455 | 9.1474  | 14.4886 |
| C | -10.6458 | 7.8129  | 15.0154 |
| C | -10.2558 | 7.6067  | 16.4324 |
| C | -9.1935  | 9.7758  | 10.7216 |
| C | -6.7456  | 10.2777 | 12.4249 |
| O | -11.3382 | 7.0358  | 14.3718 |
| O | -10.5968 | 6.6048  | 17.296  |
| C | -11.361  | 5.5421  | 16.7383 |
| H | -12.7701 | 11.1882 | 12.4391 |
| H | -12.0501 | 9.6342  | 12.1728 |
| H | -11.7465 | 10.0792 | 9.7999  |
| H | -13.3702 | 10.5165 | 10.2456 |
| H | -12.2123 | 12.1415 | 8.7264  |
| H | -12.8991 | 12.8607 | 10.161  |
| H | -10.7023 | 11.4747 | 13.38   |
| H | -8.1459  | 11.3128 | 13.6524 |
| H | -6.9751  | 12.8949 | 12.1923 |
| H | -7.7537  | 12.2309 | 10.7736 |
| H | -9.0571  | 13.5424 | 13.1933 |
| H | -8.8778  | 14.2934 | 11.6313 |
| H | -10.2927 | 8.3672  | 12.5081 |
| H | -8.6766  | 8.4024  | 13.0785 |
| H | -8.3123  | 9.1313  | 10.6349 |
| H | -9.0859  | 10.5731 | 9.985   |
| H | -10.0317 | 9.1438  | 10.419  |
| H | -5.9209  | 10.8216 | 12.9005 |
| H | -6.7798  | 9.29    | 12.8872 |
| H | -6.4764  | 10.1508 | 11.3713 |
| H | -11.5237 | 4.7998  | 17.5258 |
| H | -12.3431 | 5.8962  | 16.4092 |
| H | -10.8184 | 5.0498  | 15.9249 |
| H | -8.9987  | 13.7278 | 9.4484  |
| H | -10.2613 | 13.2616 | 8.2002  |
| C | -11.4676 | 13.7163 | 12.3957 |
| H | -11.3053 | 13.7611 | 13.4795 |
| H | -11.3668 | 14.737  | 12.0065 |
| H | -12.5091 | 13.4158 | 12.2518 |
| C | -9.4516  | 8.6231  | 16.7439 |
| C | -9.1958  | 9.5811  | 15.6223 |
| C | -9.4779  | 11.0209 | 16.112  |
| O | -8.5819  | 11.843  | 16.2813 |
| O | -10.7971 | 11.236  | 16.3643 |
| C | -11.1435 | 12.5499 | 16.8273 |
| C | -11.0129 | 12.6219 | 18.3367 |
| O | -7.8285  | 9.3925  | 15.2834 |
| H | -11.0546 | 9.7572  | 14.4744 |
| H | -8.9886  | 8.7269  | 17.7164 |
| H | -10.5376 | 13.3182 | 16.3334 |
| H | -12.1846 | 12.7263 | 16.5378 |
| H | -11.3296 | 13.6009 | 18.7073 |
| H | -11.6249 | 11.8487 | 18.8127 |
| H | -9.9789  | 12.447  | 18.6504 |
| H | -7.3367  | 10.1482 | 15.6638 |

## Diastereomer III\_13

Charge = 0 Multiplicity = 1

Symbolic Z-Matrix:

|   |          |         |         |
|---|----------|---------|---------|
| C | -11.4389 | 9.8002  | 11.1262 |
| C | -11.2453 | 9.8999  | 9.613   |
| C | -11.6176 | 11.2584 | 9.0449  |
| C | -10.9854 | 12.3898 | 9.8274  |
| C | -11.249  | 12.3677 | 11.3457 |
| C | -10.8532 | 10.9707 | 11.9699 |
| C | -9.3256  | 10.7748 | 12.4    |
| C | -8.7964  | 12.0619 | 13.14   |
| C | -9.0828  | 13.341  | 12.35   |
| C | -10.5759 | 13.5159 | 12.1405 |
| C | -10.2896 | 13.3285 | 9.1601  |
| C | -9.1685  | 9.5195  | 13.3587 |
| C | -9.9373  | 9.5618  | 14.7015 |
| C | -11.0419 | 8.5222  | 14.7352 |
| C | -10.9218 | 7.6098  | 15.8942 |
| C | -8.4248  | 10.4706 | 11.177  |
| C | -7.3025  | 12.0532 | 13.5041 |
| O | -11.9504 | 8.4513  | 13.9189 |
| O | -11.8062 | 6.6006  | 16.1174 |
| C | -11.5722 | 5.8093  | 17.2748 |
| H | -12.519  | 9.7522  | 11.3185 |
| H | -11.0533 | 8.8335  | 11.4593 |
| H | -10.2141 | 9.6676  | 9.3356  |
| H | -11.8568 | 9.1295  | 9.1267  |
| H | -11.3196 | 11.2875 | 7.9891  |
| H | -12.7073 | 11.3753 | 9.045   |
| H | -11.4044 | 10.9339 | 12.9193 |
| H | -9.3378  | 12.1561 | 14.0887 |
| H | -8.7139  | 14.2091 | 12.9116 |
| H | -8.5399  | 13.342  | 11.4002 |
| H | -11.0395 | 13.5898 | 13.1349 |
| H | -10.7688 | 14.4863 | 11.666  |
| H | -9.4485  | 8.6121  | 12.8101 |
| H | -8.0979  | 9.3889  | 13.5388 |
| H | -7.3699  | 10.3885 | 11.4578 |
| H | -8.4953  | 11.237  | 10.403  |
| H | -8.6709  | 9.5026  | 10.7319 |
| H | -7.0611  | 12.9222 | 14.127  |
| H | -7.0187  | 11.1681 | 14.0756 |
| H | -6.6636  | 12.1133 | 12.6177 |
| H | -12.3549 | 5.0467  | 17.327  |
| H | -10.6056 | 5.2985  | 17.2115 |
| H | -11.6308 | 6.4173  | 18.1838 |
| H | -9.8313  | 14.1833 | 9.6422  |
| H | -10.1631 | 13.2762 | 8.0821  |
| C | -12.7787 | 12.6034 | 11.5414 |
| H | -13.0423 | 12.624  | 12.6058 |
| H | -13.0864 | 13.5635 | 11.109  |
| H | -13.3985 | 11.8269 | 11.0844 |
| C | -9.8408  | 8.0083  | 16.5702 |
| C | -9.1388  | 9.1901  | 15.9771 |
| C | -9.1954  | 10.3793 | 16.9715 |
| O | -10.0762 | 10.5818 | 17.7956 |
| O | -8.1208  | 11.1995 | 16.7516 |
| C | -8.0405  | 12.3548 | 17.6016 |
| C | -8.8677  | 13.4919 | 17.0316 |
| O | -7.8108  | 8.7521  | 15.7304 |
| H | -10.4437 | 10.5214 | 14.8507 |
| H | -9.4772  | 7.5426  | 17.4754 |
| H | -8.3439  | 12.1123 | 18.6266 |
| H | -6.9868  | 12.6499 | 17.64   |
| H | -8.7822  | 14.3843 | 17.658  |
| H | -8.5345  | 13.7414 | 16.0195 |
| H | -9.924   | 13.2151 | 16.9589 |
| H | -7.2591  | 9.5547  | 15.6677 |

## Diastereomer III\_14

Charge = 0 Multiplicity = 1

Symbolic Z-Matrix:

|   |          |         |         |
|---|----------|---------|---------|
| C | -11.4896 | 9.8031  | 11.0826 |
| C | -11.3379 | 9.8276  | 9.5618  |
| C | -11.6798 | 11.1721 | 8.9429  |
| C | -10.9849 | 12.3137 | 9.6539  |
| C | -11.2015 | 12.3693 | 11.1791 |
| C | -10.8357 | 10.9868 | 11.8542 |
| C | -9.3024  | 10.7579 | 12.2425 |
| C | -8.7236  | 12.0545 | 12.9288 |
| C | -8.9736  | 13.3077 | 12.0862 |
| C | -10.4643 | 13.5291 | 11.8983 |
| C | -10.2752 | 13.1942 | 8.9248  |
| C | -9.1476  | 9.5258  | 13.2287 |
| C | -9.8394  | 9.6442  | 14.6044 |
| C | -10.9938 | 8.6753  | 14.7642 |
| C | -10.9197 | 7.9236  | 16.0397 |
| C | -8.4462  | 10.3956 | 11.0034 |
| C | -7.2326  | 12.0053 | 13.2974 |
| O | -11.9149 | 8.5537  | 13.9683 |
| O | -11.8882 | 7.0478  | 16.4214 |
| C | -11.665  | 6.3621  | 17.6462 |
| H | -12.5644 | 9.8053  | 11.3078 |
| H | -11.1314 | 8.8378  | 11.4484 |
| H | -10.3241 | 9.5456  | 9.2669  |
| H | -11.9903 | 9.0589  | 9.1288  |
| H | -11.4133 | 11.1428 | 7.8788  |
| H | -12.7642 | 11.3282 | 8.9691  |
| H | -11.3549 | 11.0097 | 12.8224 |
| H | -9.2572  | 12.2106 | 13.8739 |
| H | -8.5615  | 14.1851 | 12.6012 |
| H | -8.4505  | 13.2464 | 11.1273 |
| H | -10.9013 | 13.6715 | 12.8973 |
| H | -10.6317 | 14.4817 | 11.3799 |
| H | -9.4878  | 8.612   | 12.7279 |
| H | -8.0735  | 9.3641  | 13.3616 |
| H | -7.3844  | 10.3061 | 11.2544 |
| H | -8.5272  | 11.1339 | 10.204  |
| H | -8.7231  | 9.4172  | 10.6011 |
| H | -6.9591  | 12.8964 | 13.8747 |
| H | -6.9883  | 11.1423 | 13.9202 |
| H | -6.5899  | 11.9902 | 12.4121 |
| H | -12.5133 | 5.6932  | 17.8189 |
| H | -10.7573 | 5.7516  | 17.594  |
| H | -11.6118 | 7.0648  | 18.4844 |
| H | -9.7693  | 14.0504 | 9.3542  |
| H | -10.1827 | 13.0886 | 7.8472  |
| C | -12.7152 | 12.6686 | 11.4088 |
| H | -12.945  | 12.7438 | 12.4786 |
| H | -13.0023 | 13.6199 | 10.9441 |
| H | -13.3759 | 11.8966 | 11.0044 |
| C | -9.7773  | 8.2938  | 16.6264 |
| C | -8.9785  | 9.2858  | 15.8399 |
| C | -8.6934  | 10.5528 | 16.6796 |
| O | -7.5585  | 10.9906 | 16.8428 |
| O | -9.8301  | 11.1    | 17.1896 |
| C | -9.6588  | 12.2889 | 17.9757 |
| C | -9.3721  | 11.9223 | 19.4194 |
| O | -7.7689  | 8.61    | 15.5116 |
| H | -10.2936 | 10.631  | 14.7376 |
| H | -9.4182  | 7.9094  | 17.5705 |
| H | -8.8737  | 12.9309 | 17.5601 |
| H | -10.5977 | 12.8491 | 17.9167 |
| H | -9.2975  | 12.8196 | 20.0401 |
| H | -10.1655 | 11.2815 | 19.818  |
| H | -8.4367  | 11.3601 | 19.5037 |
| H | -7.0452  | 9.2607  | 15.6157 |

## Diastereomer III\_15

Charge = 0 Multiplicity = 1

Symbolic Z-Matrix:

|   |          |         |         |
|---|----------|---------|---------|
| C | -11.9129 | 10.4125 | 11.6806 |
| C | -12.0837 | 10.5724 | 10.1698 |
| C | -12.0091 | 12.0161 | 9.6957  |
| C | -10.8246 | 12.7556 | 10.2833 |
| C | -10.7023 | 12.6896 | 11.8155 |
| C | -10.7244 | 11.1923 | 12.3102 |
| C | -9.337   | 10.398  | 12.3018 |
| C | -8.2164  | 11.3069 | 12.9246 |
| C | -8.1594  | 12.6923 | 12.2677 |
| C | -9.4789  | 13.4256 | 12.4203 |
| C | -10.0026 | 13.4282 | 9.4577  |
| C | -9.4672  | 9.0281  | 13.0952 |
| C | -10.22   | 8.9855  | 14.4427 |
| C | -10.5513 | 7.556   | 14.8371 |
| C | -10.328  | 7.3274  | 16.2856 |
| C | -8.9055  | 9.9877  | 10.8688 |
| C | -6.7914  | 10.7275 | 12.9032 |
| O | -10.9989 | 6.7156  | 14.0683 |
| O | -10.608  | 6.2319  | 17.0521 |
| C | -11.1831 | 5.1273  | 16.3642 |
| H | -12.8383 | 10.7602 | 12.1583 |
| H | -11.8642 | 9.3462  | 11.9197 |
| H | -11.3398 | 9.9815  | 9.6303  |
| H | -13.0535 | 10.1509 | 9.877   |
| H | -11.9766 | 12.0198 | 8.5988  |
| H | -12.9344 | 12.5396 | 9.9624  |
| H | -10.9711 | 11.2804 | 13.3765 |
| H | -8.4734  | 11.474  | 13.9732 |
| H | -7.3798  | 13.2941 | 12.7531 |
| H | -7.8675  | 12.6156 | 11.216  |
| H | -9.6422  | 13.5739 | 13.4975 |
| H | -9.3865  | 14.4378 | 12.0067 |
| H | -9.9865  | 8.3257  | 12.4279 |
| H | -8.4831  | 8.5619  | 13.2168 |
| H | -7.9339  | 9.4824  | 10.8714 |
| H | -8.8278  | 10.8368 | 10.1886 |
| H | -9.5954  | 9.2627  | 10.4306 |
| H | -6.1233  | 11.3569 | 13.503  |
| H | -6.7346  | 9.7212  | 13.321  |
| H | -6.3771  | 10.6998 | 11.8902 |
| H | -11.3535 | 4.3314  | 17.0957 |
| H | -12.1532 | 5.3939  | 15.9326 |
| H | -10.4987 | 4.7378  | 15.6039 |
| H | -9.1493  | 13.9984 | 9.8048  |
| H | -10.1649 | 13.4356 | 8.3831  |
| C | -11.9345 | 13.4487 | 12.4    |
| H | -11.9148 | 13.4492 | 13.4967 |
| H | -11.9414 | 14.4955 | 12.0717 |
| H | -12.8933 | 13.0111 | 12.1087 |
| C | -9.7547  | 8.4386  | 16.7478 |
| C | -9.5116  | 9.4955  | 15.7154 |
| C | -10.182  | 10.8091 | 16.1986 |
| O | -11.3826 | 10.9767 | 16.3647 |
| O | -9.2223  | 11.7574 | 16.4255 |
| C | -9.7394  | 13.0323 | 16.8281 |
| C | -8.5819  | 14.0091 | 16.8907 |
| O | -8.1043  | 9.5498  | 15.5609 |
| H | -11.2089 | 9.445   | 14.333  |
| H | -9.4563  | 8.5536  | 17.7814 |
| H | -10.4787 | 13.3844 | 16.0997 |
| H | -10.2058 | 12.9408 | 17.8151 |
| H | -8.9246  | 15.0015 | 17.1965 |
| H | -7.8226  | 13.6626 | 17.5995 |
| H | -8.0929  | 14.0888 | 15.914  |
| H | -7.7961  | 10.3292 | 16.0619 |

## Diastereomer III\_16

Charge = 0 Multiplicity = 1

Symbolic Z-Matrix:

|   |          |         |         |
|---|----------|---------|---------|
| C | -11.3169 | 9.6871  | 11.0009 |
| C | -11.0517 | 9.7772  | 9.498   |
| C | -11.4985 | 11.0925 | 8.8841  |
| C | -10.998  | 12.2826 | 9.6747  |
| C | -11.3385 | 12.2646 | 11.1779 |
| C | -10.8693 | 10.9133 | 11.8503 |
| C | -9.3563  | 10.8445 | 12.362  |
| C | -8.9685  | 12.1816 | 13.1027 |
| C | -9.3097  | 13.4207 | 12.2715 |
| C | -10.7987 | 13.4751 | 11.9818 |
| C | -10.3429 | 13.2619 | 9.0248  |
| C | -9.1527  | 9.6195  | 13.3511 |
| C | -9.9837  | 9.6248  | 14.6554 |
| C | -11.0362 | 8.5324  | 14.6667 |
| C | -10.992  | 7.7247  | 15.9068 |
| C | -8.3709  | 10.5938 | 11.1933 |
| C | -7.5006  | 12.2952 | 13.5455 |
| O | -11.8607 | 8.3525  | 13.7812 |
| O | -11.8825 | 6.7264  | 16.154  |
| C | -11.7186 | 6.0331  | 17.3839 |
| H | -12.3986 | 9.5573  | 11.1381 |
| H | -10.8754 | 8.759   | 11.3723 |
| H | -9.9921  | 9.6229  | 9.2791  |
| H | -11.5743 | 8.9531  | 8.9966  |
| H | -11.1489 | 11.1278 | 7.8445  |
| H | -12.5925 | 11.1231 | 8.8265  |
| H | -11.4647 | 10.8487 | 12.7712 |
| H | -9.565   | 12.2511 | 14.0201 |
| H | -9.0385  | 14.3246 | 12.8323 |
| H | -8.719   | 13.4473 | 11.3509 |
| H | -11.3188 | 13.5297 | 12.9491 |
| H | -11.0404 | 14.4194 | 11.4777 |
| H | -9.3352  | 8.6835  | 12.8099 |
| H | -8.0854  | 9.5782  | 13.5861 |
| H | -7.329   | 10.6029 | 11.5294 |
| H | -8.4617  | 11.3387 | 10.4006 |
| H | -8.5149  | 9.6016  | 10.7567 |
| H | -6.8224  | 12.405  | 12.6935 |
| H | -7.3664  | 13.1828 | 14.1749 |
| H | -7.1758  | 11.4372 | 14.1366 |
| H | -12.4974 | 5.2673  | 17.4469 |
| H | -10.7462 | 5.531   | 17.4243 |
| H | -11.8407 | 6.7109  | 18.2354 |
| H | -9.9781  | 14.1578 | 9.5121  |
| H | -10.1563 | 13.2021 | 7.9559  |
| C | -12.89   | 12.383  | 11.2902 |
| H | -13.2099 | 12.4003 | 12.3391 |
| H | -13.248  | 13.3087 | 10.823  |
| H | -13.423  | 11.5528 | 10.8182 |
| C | -9.9617  | 8.1913  | 16.6179 |
| C | -9.2178  | 9.3156  | 15.9664 |
| C | -9.2666  | 10.5653 | 16.8832 |
| O | -10.2057 | 10.8927 | 17.5952 |
| O | -8.1046  | 11.2742 | 16.7375 |
| C | -8.0143  | 12.4859 | 17.5032 |
| C | -7.4902  | 12.1867 | 18.8948 |
| O | -7.9007  | 8.8225  | 15.7685 |
| H | -10.5484 | 10.5563 | 14.77   |
| H | -9.6555  | 7.8048  | 17.5798 |
| H | -7.3127  | 13.1428 | 16.9787 |
| H | -8.9778  | 13.007  | 17.5384 |
| H | -7.3609  | 13.1096 | 19.4672 |
| H | -8.1752  | 11.5301 | 19.4403 |
| H | -6.5278  | 11.6673 | 18.8395 |
| H | -7.3158  | 9.6025  | 15.7149 |

## Diastereomer III\_17

Charge = 0 Multiplicity = 1

Symbolic Z-Matrix:

|   |          |         |         |
|---|----------|---------|---------|
| C | -11.9522 | 10.7924 | 11.8773 |
| C | -12.2855 | 10.9768 | 10.3966 |
| C | -12.0214 | 12.3835 | 9.8805  |
| C | -10.6623 | 12.9068 | 10.2982 |
| C | -10.3584 | 12.822  | 11.8036 |
| C | -10.5748 | 11.3521 | 12.3311 |
| C | -9.3585  | 10.3268 | 12.164  |
| C | -8.0274  | 11.0253 | 12.6228 |
| C | -7.8169  | 12.381  | 11.9349 |
| C | -8.9596  | 13.3329 | 12.2354 |
| C | -9.8485  | 13.4261 | 9.3613  |
| C | -9.6213  | 8.9997  | 12.9966 |
| C | -10.1747 | 9.099   | 14.4331 |
| C | -10.7324 | 7.769   | 14.9027 |
| C | -10.3567 | 7.4792  | 16.3068 |
| C | -9.192   | 9.8487  | 10.6974 |
| C | -6.739   | 10.2069 | 12.429  |
| O | -11.4591 | 7.0438  | 14.2366 |
| O | -10.8397 | 6.4003  | 16.9795 |
| C | -10.3504 | 6.2145  | 18.3008 |
| H | -12.7333 | 11.2986 | 12.4597 |
| H | -12.0599 | 9.7349  | 12.1351 |
| H | -11.7324 | 10.2624 | 9.7825  |
| H | -13.3436 | 10.7325 | 10.2394 |
| H | -12.1274 | 12.3779 | 8.7883  |
| H | -12.8006 | 13.0619 | 10.2464 |
| H | -10.6616 | 11.4844 | 13.4175 |
| H | -8.1141  | 11.231  | 13.6934 |
| H | -6.8896  | 12.8374 | 12.3053 |
| H | -7.679   | 12.2556 | 10.8567 |
| H | -8.9574  | 13.5062 | 13.3215 |
| H | -8.7468  | 14.3138 | 11.7918 |
| H | -10.345  | 8.4035  | 12.423  |
| H | -8.7293  | 8.3634  | 12.9944 |
| H | -8.3299  | 9.1821  | 10.5877 |
| H | -9.0568  | 10.6718 | 9.9945  |
| H | -10.0471 | 9.255   | 10.366  |
| H | -5.9011  | 10.7049 | 12.931  |
| H | -6.8054  | 9.2018  | 12.8482 |
| H | -6.4679  | 10.1169 | 11.3721 |
| H | -10.8148 | 5.3124  | 18.71   |
| H | -9.2653  | 6.0665  | 18.2998 |
| H | -10.6257 | 7.0581  | 18.9426 |
| H | -8.8727  | 13.8395 | 9.5865  |
| H | -10.1418 | 13.461  | 8.3154  |
| C | -11.3571 | 13.7847 | 12.5198 |
| H | -11.1998 | 13.7821 | 13.6051 |
| H | -11.2239 | 14.8165 | 12.1717 |
| H | -12.4062 | 13.5214 | 12.3596 |
| C | -9.507   | 8.4456  | 16.6695 |
| C | -9.2101  | 9.4396  | 15.5856 |
| C | -9.4262  | 10.8681 | 16.1368 |
| O | -8.492   | 11.6325 | 16.362  |
| O | -10.7359 | 11.1473 | 16.3696 |
| C | -10.985  | 12.4723 | 16.8556 |
| C | -12.4858 | 12.679  | 16.9078 |
| O | -7.8493  | 9.2065  | 15.2452 |
| H | -11.0573 | 9.7463  | 14.4457 |
| H | -9.0277  | 8.5081  | 17.6364 |
| H | -10.5575 | 12.578  | 17.8585 |
| H | -10.5353 | 13.2103 | 16.1817 |
| H | -12.7296 | 13.6788 | 17.2775 |
| H | -12.926  | 12.5525 | 15.913  |
| H | -12.9553 | 11.9357 | 17.5606 |
| H | -7.3351  | 9.9608  | 15.5982 |

## Diastereomer III\_18

Charge = 0 Multiplicity = 1

Symbolic Z-Matrix:

|   |          |         |         |
|---|----------|---------|---------|
| C | -11.9316 | 10.4392 | 11.6794 |
| C | -12.0968 | 10.5423 | 10.163  |
| C | -12.0037 | 11.9654 | 9.6318  |
| C | -10.8193 | 12.7206 | 10.2001 |
| C | -10.7072 | 12.7093 | 11.7343 |
| C | -10.7367 | 11.2307 | 12.2807 |
| C | -9.3517  | 10.4311 | 12.2944 |
| C | -8.2358  | 11.3492 | 12.9121 |
| C | -8.1677  | 12.7192 | 12.2215 |
| C | -9.4863  | 13.4617 | 12.3227 |
| C | -9.9879  | 13.359  | 9.3569  |
| C | -9.4918  | 9.0752  | 13.1074 |
| C | -10.2065 | 9.0714  | 14.4767 |
| C | -10.641  | 7.6632  | 14.8497 |
| C | -10.3385 | 7.3558  | 16.2682 |
| C | -8.9097  | 9.9934  | 10.8727 |
| C | -6.8108  | 10.7675 | 12.9029 |
| O | -11.2152 | 6.896   | 14.0881 |
| O | -10.6464 | 6.2503  | 17.0095 |
| C | -11.3476 | 5.2207  | 16.3221 |
| H | -12.8545 | 10.8151 | 12.1404 |
| H | -11.8968 | 9.3831  | 11.9613 |
| H | -11.3596 | 9.9209  | 9.6496  |
| H | -13.0711 | 10.1215 | 9.8842  |
| H | -11.9606 | 11.9243 | 8.536   |
| H | -12.927  | 12.5069 | 9.8676  |
| H | -10.9803 | 11.3564 | 13.3444 |
| H | -8.5005  | 11.534  | 13.9588 |
| H | -7.3959  | 13.3319 | 12.7056 |
| H | -7.8556  | 12.6157 | 11.1777 |
| H | -9.663   | 13.6541 | 13.3891 |
| H | -9.3832  | 14.4562 | 11.8707 |
| H | -10.0414 | 8.3769  | 12.4608 |
| H | -8.5149  | 8.5884  | 13.2069 |
| H | -7.9389  | 9.4864  | 10.893  |
| H | -8.8227  | 10.8284 | 10.1768 |
| H | -9.597   | 9.2616  | 10.4423 |
| H | -6.1495  | 11.3905 | 13.5166 |
| H | -6.7582  | 9.7555  | 13.3063 |
| H | -6.3849  | 10.7495 | 11.8942 |
| H | -11.5235 | 4.4064  | 17.0317 |
| H | -12.3236 | 5.5737  | 15.9741 |
| H | -10.7487 | 4.8189  | 15.4985 |
| H | -9.1338  | 13.9361 | 9.6901  |
| H | -10.1426 | 13.3288 | 8.2817  |
| C | -11.9408 | 13.4937 | 12.2821 |
| H | -11.9326 | 13.528  | 13.3784 |
| H | -11.9373 | 14.5298 | 11.9215 |
| H | -12.8997 | 13.0541 | 11.9943 |
| C | -9.6563  | 8.4019  | 16.7333 |
| C | -9.4117  | 9.4895  | 15.7329 |
| C | -9.9769  | 10.8078 | 16.3246 |
| O | -11.1622 | 11.0943 | 16.4213 |
| O | -8.9419  | 11.584  | 16.7753 |
| C | -9.3182  | 12.8091 | 17.4235 |
| C | -9.534   | 13.9056 | 16.3988 |
| O | -8.0128  | 9.4912  | 15.5087 |
| H | -11.1564 | 9.6118  | 14.4118 |
| H | -9.284   | 8.4485  | 17.7482 |
| H | -10.2034 | 12.6674 | 18.0541 |
| H | -8.4918  | 13.0839 | 18.0871 |
| H | -9.7422  | 14.8602 | 16.8901 |
| H | -8.649   | 14.0192 | 15.7643 |
| H | -10.3733 | 13.6646 | 15.7393 |
| H | -7.6273  | 10.125  | 16.1435 |

## Diastereomer IV\_1

Charge = 0 Multiplicity = 1

Symbolic Z-Matrix:

|   |          |         |         |
|---|----------|---------|---------|
| C | -12.7258 | 2.3064  | 8.8605  |
| C | -13.7994 | 2.6089  | 7.8153  |
| C | -14.9397 | 1.6035  | 7.8104  |
| C | -15.4747 | 1.342   | 9.2028  |
| C | -14.4204 | 0.9407  | 10.2507 |
| C | -13.2449 | 1.9934  | 10.2927 |
| C | -13.4569 | 3.2804  | 11.2208 |
| C | -14.0539 | 2.8453  | 12.6126 |
| C | -15.2979 | 1.9657  | 12.4521 |
| C | -14.9686 | 0.7004  | 11.6811 |
| C | -16.7991 | 1.4419  | 9.4178  |
| C | -12.0787 | 4.0323  | 11.4404 |
| C | -10.9299 | 3.1983  | 12.0508 |
| C | -10.3306 | 3.8555  | 13.2797 |
| C | -8.8472  | 3.8649  | 13.2284 |
| C | -14.3903 | 4.3241  | 10.5593 |
| C | -14.4069 | 3.9916  | 13.5748 |
| O | -10.9891 | 4.2728  | 14.2227 |
| O | -7.9446  | 4.2926  | 14.1606 |
| C | -8.4958  | 4.9109  | 15.3173 |
| H | -12.1575 | 1.4358  | 8.5076  |
| H | -12.0013 | 3.1239  | 8.8656  |
| H | -14.2087 | 3.6121  | 7.9562  |
| H | -13.3324 | 2.6236  | 6.8225  |
| H | -15.7277 | 1.975   | 7.1432  |
| H | -14.5999 | 0.6609  | 7.3662  |
| H | -12.4203 | 1.4497  | 10.7711 |
| H | -13.3035 | 2.2361  | 13.1313 |
| H | -15.6699 | 1.6733  | 13.4427 |
| H | -16.1111 | 2.523   | 11.9773 |
| H | -14.22   | 0.1482  | 12.2677 |
| H | -15.8487 | 0.0454  | 11.658  |
| H | -11.7717 | 4.4663  | 10.4847 |
| H | -12.26   | 4.9161  | 12.0639 |
| H | -14.5736 | 5.1791  | 11.2183 |
| H | -15.3625 | 3.9089  | 10.2888 |
| H | -13.937  | 4.755   | 9.6627  |
| H | -14.6741 | 3.5867  | 14.558  |
| H | -13.5733 | 4.6776  | 13.7331 |
| H | -15.2679 | 4.5698  | 13.2249 |
| H | -9.0872  | 4.1968  | 15.899  |
| H | -7.6639  | 5.2417  | 15.9466 |
| H | -9.083   | 5.7957  | 15.0509 |
| H | -17.261  | 1.248   | 10.3785 |
| H | -17.4814 | 1.7203  | 8.6191  |
| C | -13.8555 | -0.4472 | 9.8146  |
| H | -13.1002 | -0.807  | 10.5238 |
| H | -14.6527 | -1.1998 | 9.7747  |
| H | -13.3745 | -0.4313 | 8.8327  |
| C | -8.5128  | 3.36    | 12.0408 |
| C | -9.6715  | 2.9782  | 11.1767 |
| C | -9.5371  | 1.5031  | 10.7344 |
| O | -9.3986  | 1.181   | 9.5576  |
| O | -9.5759  | 0.6382  | 11.783  |
| C | -9.4716  | -0.7431 | 11.4162 |
| C | -9.6132  | -1.5764 | 12.6746 |
| O | -9.6108  | 3.8542  | 10.0558 |
| H | -11.3034 | 2.2406  | 12.4263 |
| H | -7.4863  | 3.2615  | 11.7134 |
| H | -10.2692 | -1.0019 | 10.7106 |
| H | -8.4951  | -0.9272 | 10.9551 |
| H | -10.5774 | -1.384  | 13.157  |
| H | -9.5387  | -2.6433 | 12.4468 |
| H | -8.8363  | -1.314  | 13.4003 |
| H | -9.4504  | 3.2957  | 9.2678  |



Diastereomer **IV**\_2

Charge = 0 Multiplicity = 1

Symbolic Z-Matrix:

|   |          |         |         |
|---|----------|---------|---------|
| C | -12.724  | 1.9986  | 8.9173  |
| C | -13.7677 | 2.2739  | 7.835   |
| C | -14.9898 | 1.3726  | 7.9252  |
| C | -15.5426 | 1.2914  | 9.3333  |
| C | -14.5212 | 0.9152  | 10.4216 |
| C | -13.272  | 1.8781  | 10.3675 |
| C | -13.4002 | 3.2702  | 11.1546 |
| C | -14.015  | 3.0231  | 12.5813 |
| C | -15.3111 | 2.2074  | 12.5145 |
| C | -15.0768 | 0.8551  | 11.8681 |
| C | -16.8553 | 1.5099  | 9.5302  |
| C | -11.9792 | 3.96    | 11.2899 |
| C | -10.8676 | 3.1428  | 11.9856 |
| C | -10.4005 | 3.7799  | 13.2819 |
| C | -8.9214  | 3.8845  | 13.3446 |
| C | -14.2735 | 4.2934  | 10.3855 |
| C | -14.3087 | 4.2886  | 13.4058 |
| O | -11.15   | 4.1145  | 14.189  |
| O | -8.1207  | 4.3393  | 14.354  |
| C | -8.7952  | 4.8919  | 15.4782 |
| H | -12.2261 | 1.0533  | 8.6635  |
| H | -11.9328 | 2.749   | 8.8464  |
| H | -14.0908 | 3.3171  | 7.8622  |
| H | -13.3    | 2.1424  | 6.8512  |
| H | -15.7461 | 1.7416  | 7.2209  |
| H | -14.7315 | 0.366   | 7.5768  |
| H | -12.4907 | 1.3277  | 10.9069 |
| H | -13.294  | 2.4336  | 13.162  |
| H | -15.6881 | 2.0379  | 13.5315 |
| H | -16.0949 | 2.765   | 11.9926 |
| H | -14.3656 | 0.3111  | 12.5065 |
| H | -16.0015 | 0.2655  | 11.9071 |
| H | -11.6647 | 4.2458  | 10.2826 |
| H | -12.0964 | 4.9228  | 11.802  |
| H | -14.3985 | 5.2235  | 10.9499 |
| H | -15.2719 | 3.9145  | 10.1629 |
| H | -13.802  | 4.5982  | 9.4479  |
| H | -14.5572 | 4.0135  | 14.4376 |
| H | -13.4579 | 4.9697  | 13.4541 |
| H | -15.1652 | 4.8438  | 13.0096 |
| H | -9.4182  | 5.7436  | 15.1865 |
| H | -9.3795  | 4.1269  | 15.9991 |
| H | -8.0356  | 5.2595  | 16.1749 |
| H | -17.3279 | 1.4448  | 10.503  |
| H | -17.5164 | 1.759   | 8.7045  |
| C | -14.0705 | -0.5483 | 10.1228 |
| H | -13.3588 | -0.9037 | 10.8767 |
| H | -14.9278 | -1.2328 | 10.1362 |
| H | -13.5786 | -0.6632 | 9.153   |
| C | -8.467   | 3.4363  | 12.1748 |
| C | -9.5299  | 3.0065  | 11.2172 |
| C | -9.3063  | 1.5442  | 10.7696 |
| O | -9.2271  | 1.2264  | 9.5865  |
| O | -9.2207  | 0.6879  | 11.8232 |
| C | -8.9953  | -0.6913 | 11.4953 |
| C | -10.314  | -1.3823 | 11.2062 |
| O | -9.4219  | 3.8978  | 10.1117 |
| H | -11.2309 | 2.157   | 12.2927 |
| H | -7.4149  | 3.4097  | 11.9238 |
| H | -8.2968  | -0.7903 | 10.6565 |
| H | -8.5203  | -1.1533 | 12.3668 |
| H | -10.1615 | -2.4496 | 11.0233 |
| H | -11.0036 | -1.2619 | 12.0481 |
| H | -10.8016 | -0.9448 | 10.3294 |
| H | -9.4472  | 3.3479  | 9.3022  |

## Diastereomer IV\_3

Charge = 0 Multiplicity = 1

Symbolic Z-Matrix:

|   |          |         |         |
|---|----------|---------|---------|
| C | -12.9627 | 3.2489  | 8.7893  |
| C | -14.2071 | 3.707   | 8.0291  |
| C | -15.1497 | 2.5699  | 7.6751  |
| C | -15.4448 | 1.6923  | 8.8722  |
| C | -14.2075 | 1.1364  | 9.6045  |
| C | -13.2102 | 2.3015  | 10.0002 |
| C | -13.4775 | 3.0462  | 11.3856 |
| C | -13.8031 | 1.9799  | 12.4963 |
| C | -14.9339 | 1.0369  | 12.0789 |
| C | -14.5289 | 0.2561  | 10.8406 |
| C | -16.7283 | 1.4402  | 9.1881  |
| C | -12.2319 | 3.9257  | 11.8282 |
| C | -10.9602 | 3.2228  | 12.3525 |
| C | -10.1188 | 4.1743  | 13.1874 |
| C | -8.679   | 4.0803  | 12.842  |
| C | -14.6511 | 4.0519  | 11.2613 |
| C | -14.1248 | 2.5513  | 13.8855 |
| O | -10.5674 | 4.8873  | 14.0753 |
| O | -7.6012  | 4.6962  | 13.4124 |
| C | -7.898   | 5.6411  | 14.4339 |
| H | -12.3136 | 2.7236  | 8.0762  |
| H | -12.3956 | 4.1363  | 9.0792  |
| H | -14.7545 | 4.4622  | 8.5989  |
| H | -13.8927 | 4.2104  | 7.1063  |
| H | -16.0694 | 2.9978  | 7.2564  |
| H | -14.7162 | 1.9635  | 6.8718  |
| H | -12.2546 | 1.7926  | 10.1653 |
| H | -12.9178 | 1.344   | 12.6218 |
| H | -15.1308 | 0.3184  | 12.885  |
| H | -15.8686 | 1.5841  | 11.9255 |
| H | -13.6403 | -0.3358 | 11.1044 |
| H | -15.3006 | -0.4875 | 10.605  |
| H | -11.9581 | 4.6328  | 11.0379 |
| H | -12.588  | 4.5877  | 12.6305 |
| H | -14.9081 | 4.4998  | 12.2267 |
| H | -15.561  | 3.5955  | 10.8689 |
| H | -14.3826 | 4.8958  | 10.6192 |
| H | -14.2056 | 1.7384  | 14.6166 |
| H | -13.3428 | 3.2235  | 14.2469 |
| H | -15.0783 | 3.0876  | 13.8984 |
| H | -8.5249  | 6.4529  | 14.0512 |
| H | -8.3578  | 5.1522  | 15.2985 |
| H | -6.9524  | 6.0804  | 14.7662 |
| H | -17.0241 | 0.8069  | 10.0157 |
| H | -17.5453 | 1.8649  | 8.6108  |
| C | -13.4938 | 0.1667  | 8.6123  |
| H | -12.6085 | -0.2882 | 9.0729  |
| H | -14.1625 | -0.6491 | 8.3113  |
| H | -13.1486 | 0.6584  | 7.6986  |
| C | -8.6022  | 3.2471  | 11.8047 |
| C | -9.9184  | 2.712   | 11.3353 |
| C | -9.846   | 1.1677  | 11.2883 |
| O | -9.8365  | 0.5424  | 10.2314 |
| O | -9.7569  | 0.6108  | 12.5255 |
| C | -9.6892  | -0.8206 | 12.5284 |
| C | -9.6544  | -1.2873 | 13.9702 |
| O | -10.1052 | 3.2695  | 10.0411 |
| H | -11.2312 | 2.4412  | 13.0682 |
| H | -7.6668  | 3.0011  | 11.3194 |
| H | -10.5713 | -1.2345 | 12.0269 |
| H | -8.781   | -1.1466 | 12.0096 |
| H | -9.6019  | -2.3781 | 14.0263 |
| H | -8.7896  | -0.8638 | 14.4917 |
| H | -10.5469 | -0.9478 | 14.5064 |
| H | -9.9029  | 2.5611  | 9.3969  |

## Diastereomer IV\_4

Charge = 0 Multiplicity = 1

Symbolic Z-Matrix:

|   |          |         |         |
|---|----------|---------|---------|
| C | -12.7376 | 2.2756  | 8.8704  |
| C | -13.7781 | 2.5901  | 7.7956  |
| C | -14.9515 | 1.624   | 7.7882  |
| C | -15.5249 | 1.4153  | 9.174   |
| C | -14.5078 | 1.0021  | 10.2539 |
| C | -13.2959 | 2.0129  | 10.2982 |
| C | -13.4794 | 3.327   | 11.1932 |
| C | -14.1249 | 2.947   | 12.5797 |
| C | -15.3969 | 2.1106  | 12.4093 |
| C | -15.096  | 0.8158  | 11.6765 |
| C | -16.8491 | 1.5671  | 9.3571  |
| C | -12.0787 | 4.0305  | 11.4298 |
| C | -10.9781 | 3.1695  | 12.0908 |
| C | -10.3734 | 3.852   | 13.3035 |
| C | -8.8901  | 3.8312  | 13.2644 |
| C | -14.3564 | 4.39    | 10.4866 |
| C | -14.4559 | 4.1277  | 13.5075 |
| O | -11.031  | 4.3145  | 14.226  |
| O | -7.9865  | 4.2839  | 14.1838 |
| C | -8.5344  | 4.9659  | 15.3058 |
| H | -12.1914 | 1.379   | 8.5491  |
| H | -11.9875 | 3.0693  | 8.8726  |
| H | -14.1559 | 3.6095  | 7.9058  |
| H | -13.2901 | 2.5666  | 6.8132  |
| H | -15.7117 | 2.0057  | 7.0948  |
| H | -14.6348 | 0.66    | 7.3739  |
| H | -12.5008 | 1.4518  | 10.8058 |
| H | -13.4109 | 2.3223  | 13.1301 |
| H | -15.8028 | 1.8559  | 13.397  |
| H | -16.1771 | 2.6858  | 11.9019 |
| H | -14.381  | 0.2518  | 12.2929 |
| H | -15.9983 | 0.1919  | 11.6483 |
| H | -11.7302 | 4.4311  | 10.4737 |
| H | -12.2425 | 4.9352  | 12.0278 |
| H | -14.522  | 5.2662  | 11.1219 |
| H | -15.3372 | 4.0056  | 10.202  |
| H | -13.866  | 4.7826  | 9.5919  |
| H | -14.7627 | 3.7559  | 14.4923 |
| H | -13.5997 | 4.7839  | 13.672  |
| H | -15.2846 | 4.7309  | 13.1236 |
| H | -9.1421  | 4.2905  | 15.9162 |
| H | -7.701   | 5.3118  | 15.9249 |
| H | -9.1043  | 5.847   | 14.9935 |
| H | -17.3384 | 1.4128  | 10.3113 |
| H | -17.5037 | 1.8501  | 8.537   |
| C | -13.9836 | -0.4147 | 9.8626  |
| H | -13.2567 | -0.7837 | 10.5965 |
| H | -14.8059 | -1.1396 | 9.8223  |
| H | -13.4814 | -0.4388 | 8.8916  |
| C | -8.5565  | 3.2649  | 12.1047 |
| C | -9.715   | 2.8608  | 11.2509 |
| C | -9.6212  | 1.356   | 10.9077 |
| O | -9.521   | 0.9539  | 9.7521  |
| O | -9.6486  | 0.5679  | 12.016  |
| C | -9.5688  | -0.8465 | 11.7842 |
| C | -8.1178  | -1.2806 | 11.7014 |
| O | -9.6147  | 3.659   | 10.0765 |
| H | -11.3988 | 2.2431  | 12.4943 |
| H | -7.5296  | 3.1299  | 11.7915 |
| H | -10.053  | -1.3375 | 12.6347 |
| H | -10.1271 | -1.1342 | 10.8859 |
| H | -8.0435  | -2.3653 | 11.5832 |
| H | -7.6118  | -0.8015 | 10.8574 |
| H | -7.5762  | -0.9856 | 12.6062 |
| H | -9.5181  | 3.0422  | 9.3222  |

Diastereomer **IV**<sub>5</sub>

Charge = 0 Multiplicity = 1

Symbolic Z-Matrix:

|   |          |         |         |
|---|----------|---------|---------|
| C | -12.6279 | 2.0369  | 8.9809  |
| C | -13.6539 | 2.2406  | 7.8661  |
| C | -14.8268 | 1.2785  | 7.9437  |
| C | -15.4214 | 1.2276  | 9.3345  |
| C | -14.4244 | 0.9287  | 10.4703 |
| C | -13.2    | 1.925   | 10.4241 |
| C | -13.3718 | 3.3264  | 11.1768 |
| C | -14.0721 | 3.1201  | 12.5733 |
| C | -15.3482 | 2.2819  | 12.4602 |
| C | -15.0394 | 0.9085  | 11.8927 |
| C | -16.7472 | 1.4066  | 9.4772  |
| C | -11.9537 | 4.0049  | 11.3865 |
| C | -10.9188 | 3.2058  | 12.2157 |
| C | -10.3938 | 4.0395  | 13.3709 |
| C | -8.9145  | 4.1302  | 13.3616 |
| C | -14.1907 | 4.3328  | 10.3312 |
| C | -14.4194 | 4.4079  | 13.3388 |
| O | -11.1104 | 4.5516  | 14.2205 |
| O | -8.0737  | 4.7839  | 14.2173 |
| C | -8.6992  | 5.487   | 15.284  |
| H | -12.0831 | 1.1111  | 8.7599  |
| H | -11.8765 | 2.8257  | 8.9068  |
| H | -14.0326 | 3.2658  | 7.8665  |
| H | -13.1534 | 2.1164  | 6.8976  |
| H | -15.5746 | 1.5804  | 7.1995  |
| H | -14.5041 | 0.2747  | 7.645   |
| H | -12.4142 | 1.4114  | 10.9935 |
| H | -13.3887 | 2.559   | 13.2214 |
| H | -15.7877 | 2.1478  | 13.4572 |
| H | -16.1038 | 2.8023  | 11.8642 |
| H | -14.3393 | 0.4178  | 12.5843 |
| H | -15.9444 | 0.2884  | 11.9191 |
| H | -11.5435 | 4.2613  | 10.406  |
| H | -12.11   | 4.9872  | 11.8499 |
| H | -14.3482 | 5.2771  | 10.8624 |
| H | -15.174  | 3.9458  | 10.0567 |
| H | -13.6598 | 4.6125  | 9.4172  |
| H | -14.7433 | 4.1627  | 14.3571 |
| H | -13.5675 | 5.0835  | 13.4314 |
| H | -15.242  | 4.9549  | 12.867  |
| H | -9.3512  | 6.2801  | 14.9041 |
| H | -9.2427  | 4.8013  | 15.9418 |
| H | -7.9117  | 5.9612  | 15.8777 |
| H | -17.2539 | 1.3599  | 10.4338 |
| H | -17.3867 | 1.6019  | 8.6204  |
| C | -13.9092 | -0.5272 | 10.2471 |
| H | -13.2025 | -0.8211 | 11.0326 |
| H | -14.7389 | -1.2445 | 10.2672 |
| H | -13.3867 | -0.6606 | 9.2957  |
| C | -8.5082  | 3.423   | 12.3079 |
| C | -9.6032  | 2.7884  | 11.5121 |
| C | -9.4541  | 1.2454  | 11.5939 |
| O | -9.2199  | 0.605   | 12.6098 |
| O | -9.6749  | 0.6976  | 10.3581 |
| C | -9.5729  | -0.7327 | 10.3312 |
| C | -9.7573  | -1.1984 | 8.9004  |
| O | -9.4633  | 3.3035  | 10.1979 |
| H | -11.3749 | 2.3312  | 12.6916 |
| H | -7.4647  | 3.3136  | 12.0435 |
| H | -8.5859  | -1.0416 | 10.6937 |
| H | -10.3532 | -1.1669 | 10.9661 |
| H | -9.6693  | -2.2862 | 8.8306  |
| H | -10.7392 | -0.9008 | 8.5197  |
| H | -9.009   | -0.7396 | 8.2458  |
| H | -9.7218  | 2.5865  | 9.5879  |

Diastereomer **IV**<sub>6</sub>

Charge = 0 Multiplicity = 1

Symbolic Z-Matrix:

|   |          |         |         |
|---|----------|---------|---------|
| C | -12.6432 | 1.7178  | 9.0852  |
| C | -13.626  | 1.876   | 7.9254  |
| C | -14.8826 | 1.0344  | 8.081   |
| C | -15.5012 | 1.1817  | 9.4551  |
| C | -14.5486 | 0.936   | 10.6403 |
| C | -13.2532 | 1.8285  | 10.5119 |
| C | -13.3387 | 3.3217  | 11.089  |
| C | -14.0622 | 3.3283  | 12.4866 |
| C | -15.3901 | 2.5654  | 12.4535 |
| C | -15.1779 | 1.1198  | 12.0446 |
| C | -16.8115 | 1.4725  | 9.5473  |
| C | -11.8812 | 3.9308  | 11.2367 |
| C | -10.899  | 3.1697  | 12.1571 |
| C | -10.4751 | 3.9958  | 13.3584 |
| C | -9.0044  | 3.9773  | 13.5479 |
| C | -14.0831 | 4.2707  | 10.1171 |
| C | -14.3421 | 4.7199  | 13.0803 |
| O | -11.2562 | 4.5667  | 14.107  |
| O | -8.2436  | 4.5334  | 14.5371 |
| C | -8.9556  | 5.2534  | 15.5362 |
| H | -12.1864 | 0.7248  | 8.9917  |
| H | -11.8145 | 2.416   | 8.9453  |
| H | -13.9109 | 2.9224  | 7.7936  |
| H | -13.121  | 1.5936  | 6.9931  |
| H | -15.5904 | 1.3176  | 7.2917  |
| H | -14.6459 | -0.02   | 7.898   |
| H | -12.5211 | 1.3281  | 11.1583 |
| H | -13.4166 | 2.8094  | 13.2061 |
| H | -15.8411 | 2.5741  | 13.4544 |
| H | -16.1076 | 3.0645  | 11.7951 |
| H | -14.5231 | 0.6599  | 12.7988 |
| H | -16.1269 | 0.5742  | 12.122  |
| H | -11.4632 | 4.0241  | 10.2311 |
| H | -11.9645 | 4.9708  | 11.5755 |
| H | -14.1831 | 5.2794  | 10.531  |
| H | -15.0872 | 3.9187  | 9.8738  |
| H | -13.5267 | 4.4064  | 9.1859  |
| H | -14.6623 | 4.624   | 14.1244 |
| H | -13.4638 | 5.367   | 13.0734 |
| H | -15.1473 | 5.236   | 12.5469 |
| H | -9.4821  | 6.1102  | 15.1039 |
| H | -9.6392  | 4.5961  | 16.0829 |
| H | -8.2245  | 5.6406  | 16.2525 |
| H | -17.3334 | 1.5678  | 10.4921 |
| H | -17.4219 | 1.6189  | 8.6603  |
| C | -14.1463 | -0.571  | 10.59   |
| H | -13.4691 | -0.8268 | 11.4139 |
| H | -15.0295 | -1.2155 | 10.6791 |
| H | -13.631  | -0.8527 | 9.6675  |
| C | -8.5086  | 3.2884  | 12.5206 |
| C | -9.527   | 2.7893  | 11.5468 |
| C | -9.4258  | 1.2446  | 11.4529 |
| O | -9.3443  | 0.4761  | 12.4013 |
| O | -9.4893  | 0.8625  | 10.1396 |
| C | -9.4122  | -0.5553 | 9.9391  |
| C | -9.3508  | -0.8205 | 8.4475  |
| O | -9.2365  | 3.458   | 10.3286 |
| H | -11.3683 | 2.2831  | 12.5973 |
| H | -7.4484  | 3.1199  | 12.3857 |
| H | -8.5121  | -0.9543 | 10.4203 |
| H | -10.3024 | -1.0306 | 10.3657 |
| H | -8.4766  | -0.331  | 8.0055  |
| H | -9.295   | -1.8936 | 8.2443  |
| H | -10.2321 | -0.4112 | 7.9435  |
| H | -9.4759  | 2.8437  | 9.6084  |

Diastereomer **IV**<sub>7</sub>

Charge = 0 Multiplicity = 1

Symbolic Z-Matrix:

|   |          |         |         |
|---|----------|---------|---------|
| C | -12.913  | 3.15    | 8.766   |
| C | -14.1138 | 3.6184  | 7.9444  |
| C | -15.0973 | 2.5057  | 7.6263  |
| C | -15.4654 | 1.7127  | 8.8615  |
| C | -14.2756 | 1.1452  | 9.6608  |
| C | -13.2363 | 2.2852  | 10.0202 |
| C | -13.5063 | 3.1193  | 11.353  |
| C | -13.9117 | 2.1343  | 12.5114 |
| C | -15.0738 | 1.2212  | 12.1138 |
| C | -14.6718 | 0.3529  | 10.9341 |
| C | -16.7674 | 1.5371  | 9.1525  |
| C | -12.2335 | 3.9654  | 11.7828 |
| C | -11.0081 | 3.2364  | 12.3781 |
| C | -10.1547 | 4.193   | 13.1949 |
| C | -8.7115  | 4.043   | 12.8858 |
| C | -14.6277 | 4.1683  | 11.1376 |
| C | -14.2435 | 2.798   | 13.8564 |
| O | -10.6    | 4.9539  | 14.0441 |
| O | -7.6283  | 4.6537  | 13.4514 |
| C | -7.9185  | 5.6538  | 14.4209 |
| H | -12.2693 | 2.5568  | 8.1031  |
| H | -12.3146 | 4.027   | 9.0227  |
| H | -14.6416 | 4.4284  | 8.4544  |
| H | -13.7514 | 4.054   | 7.0048  |
| H | -15.9843 | 2.949   | 7.1564  |
| H | -14.6699 | 1.8354  | 6.872   |
| H | -12.3097 | 1.7445  | 10.242  |
| H | -13.0611 | 1.467   | 12.6986 |
| H | -15.3264 | 0.5598  | 12.9526 |
| H | -15.9771 | 1.8005  | 11.9017 |
| H | -13.8195 | -0.2624 | 11.2574 |
| H | -15.4705 | -0.3675 | 10.7175 |
| H | -11.9082 | 4.616   | 10.964  |
| H | -12.5794 | 4.6851  | 12.5385 |
| H | -14.8895 | 4.6821  | 12.0682 |
| H | -15.5469 | 3.7317  | 10.7445 |
| H | -14.3027 | 4.9609  | 10.4574 |
| H | -14.3839 | 2.0327  | 14.6286 |
| H | -13.4399 | 3.452   | 14.2035 |
| H | -15.1698 | 3.3786  | 13.8107 |
| H | -8.409   | 5.2192  | 15.2976 |
| H | -6.9677  | 6.0825  | 14.7522 |
| H | -8.5146  | 6.4633  | 13.9874 |
| H | -17.1148 | 0.9665  | 10.0053 |
| H | -17.5476 | 1.964   | 8.5279  |
| C | -13.5805 | 0.0891  | 8.7466  |
| H | -12.7304 | -0.3779 | 9.2586  |
| H | -14.2779 | -0.7119 | 8.4718  |
| H | -13.1877 | 0.5116  | 7.8177  |
| C | -8.6374  | 3.1606  | 11.8899 |
| C | -9.9581  | 2.6393  | 11.4179 |
| C | -9.9344  | 1.0931  | 11.4607 |
| O | -9.9462  | 0.4098  | 10.4407 |
| O | -9.8562  | 0.6091  | 12.7293 |
| C | -9.8131  | -0.8202 | 12.8563 |
| C | -8.3812  | -1.3097 | 12.7522 |
| O | -10.0958 | 3.1272  | 10.09   |
| H | -11.3311 | 2.4985  | 13.1182 |
| H | -7.6996  | 2.8654  | 11.4377 |
| H | -10.2162 | -1.0656 | 13.8442 |
| H | -10.4591 | -1.3049 | 12.1152 |
| H | -8.3288  | -2.3912 | 12.9054 |
| H | -7.9557  | -1.0744 | 11.7716 |
| H | -7.751   | -0.8158 | 13.4992 |
| H | -9.9309  | 2.3696  | 9.4928  |

Diastereomer IV<sub>8</sub>

Charge = 0 Multiplicity = 1

Symbolic Z-Matrix:

|   |          |         |         |
|---|----------|---------|---------|
| C | -12.7172 | 1.8953  | 8.9622  |
| C | -13.7524 | 2.1488  | 7.8663  |
| C | -14.9937 | 1.28    | 7.9929  |
| C | -15.5522 | 1.2823  | 9.4003  |
| C | -14.5454 | 0.9342  | 10.5125 |
| C | -13.266  | 1.8548  | 10.4176 |
| C | -13.3486 | 3.2839  | 11.1409 |
| C | -14.0028 | 3.1385  | 12.5641 |
| C | -15.3211 | 2.3597  | 12.5176 |
| C | -15.1122 | 0.9667  | 11.9547 |
| C | -16.8601 | 1.5432  | 9.5779  |
| C | -11.8982 | 3.9112  | 11.277  |
| C | -10.8506 | 3.0958  | 12.0739 |
| C | -10.442  | 3.8254  | 13.3429 |
| C | -8.9846  | 4.0902  | 13.389  |
| C | -14.1574 | 4.306   | 10.3031 |
| C | -14.2738 | 4.4593  | 13.3061 |
| O | -11.2238 | 4.1361  | 14.2313 |
| O | -8.2436  | 4.7402  | 14.3349 |
| C | -8.9673  | 5.2439  | 15.4511 |
| H | -12.2461 | 0.9273  | 8.75    |
| H | -11.9076 | 2.6211  | 8.8571  |
| H | -14.0525 | 3.1991  | 7.8477  |
| H | -13.2863 | 1.9643  | 6.8903  |
| H | -15.7385 | 1.6307  | 7.2672  |
| H | -14.7566 | 0.2521  | 7.6956  |
| H | -12.4993 | 1.3073  | 10.981  |
| H | -13.3151 | 2.5615  | 13.195  |
| H | -15.7221 | 2.2599  | 13.5346 |
| H | -16.0767 | 2.9096  | 11.9483 |
| H | -14.4188 | 0.4433  | 12.6289 |
| H | -16.0509 | 0.4017  | 12.0185 |
| H | -11.5358 | 4.1128  | 10.2661 |
| H | -11.987  | 4.9126  | 11.717  |
| H | -14.2549 | 5.2671  | 10.8186 |
| H | -15.1661 | 3.9578  | 10.0742 |
| H | -13.6505 | 4.5446  | 9.3645  |
| H | -14.5387 | 4.2546  | 14.35   |
| H | -13.4078 | 5.1229  | 13.32   |
| H | -15.1132 | 5.0084  | 12.8668 |
| H | -9.7064  | 5.9884  | 15.1383 |
| H | -9.4317  | 4.4307  | 16.0179 |
| H | -8.2534  | 5.7435  | 16.1132 |
| H | -17.3399 | 1.537   | 10.5494 |
| H | -17.511  | 1.7677  | 8.7372  |
| C | -14.1349 | -0.5546 | 10.2939 |
| H | -13.4208 | -0.8837 | 11.0583 |
| H | -15.0083 | -1.2155 | 10.3561 |
| H | -13.6602 | -0.7361 | 9.3258  |
| C | -8.4774  | 3.5515  | 12.2813 |
| C | -9.4743  | 2.8792  | 11.3942 |
| C | -9.1658  | 1.3594  | 11.3432 |
| O | -8.8175  | 0.6719  | 12.2932 |
| O | -9.3867  | 0.8921  | 10.0746 |
| C | -9.0782  | -0.4957 | 9.8683  |
| C | -10.2735 | -1.3617 | 10.2155 |
| O | -9.3447  | 3.5147  | 10.1312 |
| H | -11.2532 | 2.1372  | 12.4175 |
| H | -7.4233  | 3.5897  | 12.0402 |
| H | -8.8331  | -0.6145 | 8.8078  |
| H | -8.1897  | -0.7927 | 10.4374 |
| H | -10.0479 | -2.4187 | 10.0482 |
| H | -10.5716 | -1.2265 | 11.2597 |
| H | -11.1344 | -1.0874 | 9.5993  |
| H | -9.6258  | 2.863   | 9.461   |

Diastereomer **IV**<sub>9</sub>

Charge = 0 Multiplicity = 1

Symbolic Z-Matrix:

|   |          |         |         |
|---|----------|---------|---------|
| C | -12.6925 | 2.7326  | 8.8362  |
| C | -13.8111 | 3.08    | 7.8541  |
| C | -14.8255 | 1.964   | 7.6753  |
| C | -15.3134 | 1.4316  | 9.0052  |
| C | -14.2091 | 0.982   | 9.9819  |
| C | -13.1401 | 2.1307  | 10.2009 |
| C | -13.4603 | 3.2098  | 11.3317 |
| C | -13.9845 | 2.4735  | 12.62   |
| C | -15.1608 | 1.543   | 12.3148 |
| C | -14.7265 | 0.4564  | 11.3466 |
| C | -16.6388 | 1.3616  | 9.2265  |
| C | -12.1841 | 4.0824  | 11.6894 |
| C | -11.0264 | 3.4392  | 12.4858 |
| C | -10.194  | 4.5042  | 13.1809 |
| C | -8.7412  | 4.2497  | 13.0265 |
| C | -14.5176 | 4.2341  | 10.8442 |
| C | -14.37   | 3.3876  | 13.7928 |
| O | -10.6637 | 5.4295  | 13.8301 |
| O | -7.6745  | 4.9106  | 13.5667 |
| C | -7.9913  | 6.0237  | 14.3943 |
| H | -12.0341 | 2.0039  | 8.345   |
| H | -12.0724 | 3.6216  | 8.9703  |
| H | -14.3308 | 3.9904  | 8.1636  |
| H | -13.3656 | 3.3168  | 6.8798  |
| H | -15.6563 | 2.3427  | 7.0667  |
| H | -14.3827 | 1.1484  | 7.0924  |
| H | -12.257  | 1.6093  | 10.5877 |
| H | -13.1795 | 1.8248  | 12.9873 |
| H | -15.4974 | 1.059   | 13.2407 |
| H | -16.0204 | 2.1034  | 11.9361 |
| H | -13.9286 | -0.1186 | 11.8389 |
| H | -15.5441 | -0.2621 | 11.2079 |
| H | -11.7846 | 4.5661  | 10.7916 |
| H | -12.5476 | 4.9361  | 12.279  |
| H | -14.8169 | 4.9217  | 11.6419 |
| H | -15.4276 | 3.7609  | 10.473  |
| H | -14.1138 | 4.8741  | 10.0543 |
| H | -14.5999 | 2.7849  | 14.6793 |
| H | -13.5583 | 4.0632  | 14.0738 |
| H | -15.2602 | 3.9846  | 13.5735 |
| H | -8.5114  | 6.8013  | 13.8257 |
| H | -8.5696  | 5.7115  | 15.2697 |
| H | -7.0498  | 6.45    | 14.7539 |
| H | -17.0694 | 0.9759  | 10.1428 |
| H | -17.3543 | 1.6917  | 8.4781  |
| C | -13.5107 | -0.2514 | 9.3308  |
| H | -12.7296 | -0.6527 | 9.9865  |
| H | -14.2301 | -1.059  | 9.1475  |
| H | -13.027  | -0.023  | 8.3771  |
| C | -8.6357  | 3.2052  | 12.2055 |
| C | -9.9395  | 2.6567  | 11.7152 |
| C | -9.9911  | 1.1508  | 12.0857 |
| O | -10.1431 | 0.6971  | 13.2116 |
| O | -9.7974  | 0.3966  | 10.9589 |
| C | -9.8072  | -1.0178 | 11.1926 |
| C | -9.5797  | -1.7158 | 9.8661  |
| O | -9.9684  | 2.9259  | 10.3238 |
| H | -11.4189 | 2.8478  | 13.3189 |
| H | -7.6801  | 2.8024  | 11.8966 |
| H | -9.0065  | -1.2824 | 11.8921 |
| H | -10.7758 | -1.3164 | 11.6085 |
| H | -9.5851  | -2.8022 | 9.9908  |
| H | -10.3555 | -1.4382 | 9.145   |
| H | -8.6206  | -1.4143 | 9.4321  |
| H | -9.5937  | 2.142   | 9.8785  |



Diastereomer **IV**<sub>10</sub>

Charge = 0 Multiplicity = 1

Symbolic Z-Matrix:

|   |          |         |         |
|---|----------|---------|---------|
| C | -12.7264 | 2.3205  | 8.8422  |
| C | -13.7758 | 2.6202  | 7.7719  |
| C | -14.9078 | 1.6063  | 7.734   |
| C | -15.4758 | 1.3359  | 9.1113  |
| C | -14.4456 | 0.9373  | 10.1841 |
| C | -13.278  | 1.9968  | 10.2601 |
| C | -13.5203 | 3.2784  | 11.1894 |
| C | -14.1562 | 2.8374  | 12.5617 |
| C | -15.3884 | 1.9491  | 12.3636 |
| C | -15.0284 | 0.6883  | 11.5991 |
| C | -16.8059 | 1.4258  | 9.293   |
| C | -12.1497 | 4.031   | 11.4521 |
| C | -11.022  | 3.1979  | 12.1015 |
| C | -10.4982 | 3.8342  | 13.3723 |
| C | -9.0179  | 3.9057  | 13.3905 |
| C | -14.4361 | 4.3231  | 10.5052 |
| C | -14.5481 | 3.9811  | 13.5121 |
| O | -11.201  | 4.2011  | 14.3044 |
| O | -8.3294  | 4.3859  | 14.461  |
| C | -6.9159  | 4.4406  | 14.3237 |
| H | -12.1431 | 1.4558  | 8.4994  |
| H | -12.0086 | 3.1433  | 8.8689  |
| H | -14.1962 | 3.6196  | 7.9073  |
| H | -13.2843 | 2.6432  | 6.7912  |
| H | -15.6814 | 1.9746  | 7.0483  |
| H | -14.5498 | 0.6681  | 7.295   |
| H | -12.4611 | 1.4557  | 10.7544 |
| H | -13.4172 | 2.2338  | 13.1028 |
| H | -15.7861 | 1.6516  | 13.3426 |
| H | -16.1916 | 2.5021  | 11.8672 |
| H | -14.2907 | 0.1409  | 12.2036 |
| H | -15.9022 | 0.0263  | 11.5514 |
| H | -11.8122 | 4.4603  | 10.5049 |
| H | -12.3501 | 4.9166  | 12.0674 |
| H | -14.6402 | 5.1752  | 11.1618 |
| H | -15.3992 | 3.9065  | 10.2054 |
| H | -13.9577 | 4.7583  | 9.6238  |
| H | -14.8329 | 3.5747  | 14.4898 |
| H | -13.729  | 4.6803  | 13.6876 |
| H | -15.4087 | 4.5459  | 13.14   |
| H | -6.4972  | 3.4389  | 14.1803 |
| H | -6.6272  | 5.1028  | 13.5005 |
| H | -6.5016  | 4.851   | 15.2493 |
| H | -17.2907 | 1.2247  | 10.2408 |
| H | -17.4698 | 1.7027  | 8.4783  |
| C | -13.8611 | -0.4453 | 9.7573  |
| H | -13.1215 | -0.8031 | 10.484  |
| H | -14.6521 | -1.2028 | 9.6944  |
| H | -13.3556 | -0.4224 | 8.7879  |
| C | -8.6059  | 3.4354  | 12.2089 |
| C | -9.7152  | 3.0213  | 11.2917 |
| C | -9.5347  | 1.549   | 10.8561 |
| O | -9.4509  | 1.2179  | 9.677   |
| O | -9.4874  | 0.6962  | 11.9145 |
| C | -9.3536  | -0.6852 | 11.5575 |
| C | -9.3699  | -1.505  | 12.8325 |
| O | -9.6175  | 3.8965  | 10.1731 |
| H | -11.3952 | 2.2231  | 12.4316 |
| H | -7.572   | 3.372   | 11.9001 |
| H | -10.1893 | -0.9844 | 10.9147 |
| H | -8.4064  | -0.8381 | 11.0287 |
| H | -9.2694  | -2.5714 | 12.6122 |
| H | -8.5533  | -1.202  | 13.4961 |
| H | -10.3033 | -1.3436 | 13.382  |
| H | -9.6691  | 3.338   | 9.3709  |

## Diastereomer IV\_11

Charge = 0 Multiplicity = 1

Symbolic Z-Matrix:

|   |          |         |         |
|---|----------|---------|---------|
| C | -12.6911 | 1.9404  | 8.9698  |
| C | -13.7032 | 2.1628  | 7.846   |
| C | -14.9281 | 1.2699  | 7.9538  |
| C | -15.5241 | 1.2914  | 9.345   |
| C | -14.5431 | 0.9801  | 10.4912 |
| C | -13.2722 | 1.9134  | 10.4136 |
| C | -13.3797 | 3.3498  | 11.115  |
| C | -14.087  | 3.2278  | 12.5167 |
| C | -15.3979 | 2.4405  | 12.4359 |
| C | -15.1544 | 1.0365  | 11.9142 |
| C | -16.8398 | 1.5379  | 9.4808  |
| C | -11.9318 | 3.9715  | 11.3    |
| C | -10.9319 | 3.1579  | 12.1565 |
| C | -10.4526 | 3.9523  | 13.3586 |
| C | -8.9733  | 3.9804  | 13.4494 |
| C | -14.1527 | 4.3609  | 10.2324 |
| C | -14.3851 | 4.5595  | 13.2268 |
| O | -11.2017 | 4.4739  | 14.1734 |
| O | -8.1663  | 4.5597  | 14.3874 |
| C | -8.8328  | 5.2476  | 15.439  |
| H | -12.2034 | 0.9753  | 8.7826  |
| H | -11.8912 | 2.6777  | 8.8722  |
| H | -14.0242 | 3.2066  | 7.8091  |
| H | -13.2097 | 1.9771  | 6.8838  |
| H | -15.6591 | 1.5898  | 7.2004  |
| H | -14.6613 | 0.2413  | 7.6854  |
| H | -12.514  | 1.3821  | 11.0033 |
| H | -13.4246 | 2.6661  | 13.1865 |
| H | -15.8385 | 2.3603  | 13.4382 |
| H | -16.133  | 2.9727  | 11.8245 |
| H | -14.4759 | 0.5375  | 12.6211 |
| H | -16.0873 | 0.4606  | 11.9621 |
| H | -11.5187 | 4.1607  | 10.306  |
| H | -12.0365 | 4.9785  | 11.7226 |
| H | -14.267  | 5.3301  | 10.7288 |
| H | -15.1527 | 4.0096  | 9.9712  |
| H | -13.6097 | 4.5834  | 9.3099  |
| H | -14.7004 | 4.3709  | 14.2597 |
| H | -13.5149 | 5.2159  | 13.274  |
| H | -15.1992 | 5.1075  | 12.741  |
| H | -9.421   | 6.0853  | 15.051  |
| H | -9.4506  | 4.5621  | 16.028  |
| H | -8.0683  | 5.6597  | 16.1048 |
| H | -17.3474 | 1.5446  | 10.4381 |
| H | -17.4697 | 1.7367  | 8.6179  |
| C | -14.1018 | -0.5064 | 10.3159 |
| H | -13.4065 | -0.8083 | 11.1086 |
| H | -14.966  | -1.1803 | 10.3636 |
| H | -13.5918 | -0.6986 | 9.3678  |
| C | -8.5256  | 3.305   | 12.3917 |
| C | -9.5891  | 2.7624  | 11.4927 |
| C | -9.4853  | 1.2148  | 11.4537 |
| O | -9.2652  | 0.4903  | 12.4143 |
| O | -9.7338  | 0.7779  | 10.18   |
| C | -9.7095  | -0.6465 | 9.9961  |
| C | -8.2912  | -1.1161 | 9.7343  |
| O | -9.3649  | 3.3754  | 10.2326 |
| H | -11.4047 | 2.2696  | 12.5895 |
| H | -7.472   | 3.1649  | 12.1892 |
| H | -10.1554 | -1.1655 | 10.8522 |
| H | -10.3365 | -0.8666 | 9.1259  |
| H | -8.2695  | -2.191  | 9.5336  |
| H | -7.8638  | -0.5875 | 8.8759  |
| H | -7.6432  | -0.9075 | 10.5914 |
| H | -9.6765  | 2.7445  | 9.5559  |

Diastereomer IV<sub>12</sub>

Charge = 0 Multiplicity = 1

Symbolic Z-Matrix:

|   |          |         |         |
|---|----------|---------|---------|
| C | -12.705  | 2.002   | 8.9132  |
| C | -13.72   | 2.2652  | 7.801   |
| C | -14.9301 | 1.345   | 7.852   |
| C | -15.5237 | 1.2521  | 9.2425  |
| C | -14.5303 | 0.8882  | 10.3606 |
| C | -13.294  | 1.8691  | 10.3462 |
| C | -13.4646 | 3.2567  | 11.1335 |
| C | -14.1206 | 2.9974  | 12.5394 |
| C | -15.4024 | 2.164   | 12.4303 |
| C | -15.1287 | 0.8166  | 11.7893 |
| C | -16.8448 | 1.4512  | 9.4002  |
| C | -12.0571 | 3.9639  | 11.3157 |
| C | -10.9593 | 3.1599  | 12.0466 |
| C | -10.5559 | 3.787   | 13.366  |
| C | -9.0857  | 3.9262  | 13.4929 |
| C | -14.3262 | 4.271   | 10.3399 |
| C | -14.4576 | 4.2568  | 13.3566 |
| O | -11.3369 | 4.0966  | 14.2552 |
| O | -8.4991  | 4.412   | 14.6202 |
| C | -7.0835  | 4.5349  | 14.5867 |
| H | -12.1858 | 1.065   | 8.6718  |
| H | -11.9234 | 2.7643  | 8.8678  |
| H | -14.0599 | 3.3033  | 7.8218  |
| H | -13.2212 | 2.1444  | 6.8312  |
| H | -15.6704 | 1.7041  | 7.1258  |
| H | -14.6459 | 0.3433  | 7.5096  |
| H | -12.5214 | 1.3278  | 10.9066 |
| H | -13.4101 | 2.4163  | 13.1411 |
| H | -15.8088 | 1.987   | 13.4347 |
| H | -16.1771 | 2.7119  | 11.885  |
| H | -14.4294 | 0.2816  | 12.4482 |
| H | -16.0454 | 0.2135  | 11.799  |
| H | -11.7131 | 4.2531  | 10.3191 |
| H | -12.2024 | 4.9248  | 11.8243 |
| H | -14.4812 | 5.1976  | 10.9024 |
| H | -15.312  | 3.8797  | 10.0846 |
| H | -13.8291 | 4.5846  | 9.4185  |
| H | -14.7336 | 3.976   | 14.3798 |
| H | -13.6187 | 4.95    | 13.4319 |
| H | -15.3096 | 4.8004  | 12.9353 |
| H | -6.6086  | 3.5571  | 14.4539 |
| H | -6.7687  | 5.2288  | 13.8001 |
| H | -6.7564  | 4.942   | 15.548  |
| H | -17.3454 | 1.3771  | 10.3583 |
| H | -17.4845 | 1.6927  | 8.5555  |
| C | -14.049  | -0.5678 | 10.0729 |
| H | -13.3541 | -0.914  | 10.8467 |
| H | -14.8958 | -1.2651 | 10.0599 |
| H | -13.5271 | -0.6732 | 9.1177  |
| C | -8.5682  | 3.5029  | 12.3357 |
| C | -9.5885  | 3.0617  | 11.3333 |
| C | -9.3244  | 1.6086  | 10.8772 |
| O | -9.2324  | 1.2991  | 9.693   |
| O | -9.2258  | 0.7481  | 11.9263 |
| C | -8.9852  | -0.6269 | 11.5914 |
| C | -10.2954 | -1.329  | 11.2896 |
| O | -9.4486  | 3.9655  | 10.2416 |
| H | -11.3132 | 2.1625  | 12.3257 |
| H | -7.5132  | 3.4932  | 12.101  |
| H | -8.2805  | -0.7135 | 10.7564 |
| H | -8.5113  | -1.0897 | 12.4631 |
| H | -10.1316 | -2.3942 | 11.1042 |
| H | -10.993  | -1.2179 | 12.1262 |
| H | -10.7801 | -0.8932 | 10.4104 |
| H | -9.5491  | 3.4375  | 9.4236  |

Diastereomer IV<sub>13</sub>

Charge = 0 Multiplicity = 1

Symbolic Z-Matrix:

|   |          |         |         |
|---|----------|---------|---------|
| C | -12.647  | 1.6548  | 9.0962  |
| C | -13.5955 | 1.7897  | 7.9053  |
| C | -14.8588 | 0.9551  | 8.0431  |
| C | -15.5158 | 1.133   | 9.3955  |
| C | -14.598  | 0.9112  | 10.6124 |
| C | -13.2973 | 1.7985  | 10.5018 |
| C | -13.3957 | 3.3046  | 11.0439 |
| C | -14.1594 | 3.3433  | 12.4186 |
| C | -15.4866 | 2.5803  | 12.3654 |
| C | -15.2658 | 1.1261  | 11.9943 |
| C | -16.8276 | 1.4279  | 9.4444  |
| C | -11.9412 | 3.9154  | 11.2194 |
| C | -10.9848 | 3.1799  | 12.1861 |
| C | -10.6525 | 4.0051  | 13.414  |
| C | -9.1968  | 4.0432  | 13.6833 |
| C | -14.1097 | 4.2326  | 10.0297 |
| C | -14.4574 | 4.749   | 12.9694 |
| O | -11.4808 | 4.5411  | 14.137  |
| O | -8.6777  | 4.6645  | 14.7765 |
| C | -7.2625  | 4.6293  | 14.9029 |
| H | -12.1914 | 0.6584  | 9.0383  |
| H | -11.8117 | 2.3469  | 8.9647  |
| H | -13.873  | 2.8336  | 7.7422  |
| H | -13.0648 | 1.4854  | 6.9945  |
| H | -15.5431 | 1.2233  | 7.2281  |
| H | -14.6205 | -0.1036 | 7.8893  |
| H | -12.5853 | 1.3104  | 11.1791 |
| H | -13.5343 | 2.8408  | 13.1674 |
| H | -15.9651 | 2.6115  | 13.353  |
| H | -16.185  | 3.0652  | 11.6765 |
| H | -14.6331 | 0.6819  | 12.7763 |
| H | -16.2176 | 0.5835  | 12.0569 |
| H | -11.4957 | 3.9769  | 10.2234 |
| H | -12.0303 | 4.9647  | 11.5273 |
| H | -14.2196 | 5.2507  | 10.4176 |
| H | -15.1072 | 3.8768  | 9.7656  |
| H | -13.5264 | 4.3466  | 9.1122  |
| H | -14.8002 | 4.6791  | 14.0083 |
| H | -13.5821 | 5.4004  | 12.9636 |
| H | -15.2526 | 5.2473  | 12.4048 |
| H | -6.9023  | 3.599   | 14.9917 |
| H | -6.781   | 5.1371  | 14.0604 |
| H | -6.9913  | 5.1626  | 15.8188 |
| H | -17.3755 | 1.5445  | 10.3719 |
| H | -17.4125 | 1.5563  | 8.5375  |
| C | -14.1986 | -0.5974 | 10.6058 |
| H | -13.5454 | -0.8369 | 11.4537 |
| H | -15.0857 | -1.238  | 10.6842 |
| H | -13.6587 | -0.9002 | 9.7043  |
| C | -8.6151  | 3.3852  | 12.6762 |
| C | -9.5683  | 2.8608  | 11.6466 |
| C | -9.403   | 1.3232  | 11.5359 |
| O | -9.259   | 0.5516  | 12.4743 |
| O | -9.4839  | 0.9502  | 10.2211 |
| C | -9.3467  | -0.4605 | 10.0031 |
| C | -9.2743  | -0.7049 | 8.5083  |
| O | -9.2343  | 3.5512  | 10.4512 |
| H | -11.4416 | 2.2702  | 12.5906 |
| H | -7.5486  | 3.2434  | 12.5722 |
| H | -8.4307  | -0.8286 | 10.4789 |
| H | -10.2162 | -0.977  | 10.4242 |
| H | -9.1747  | -1.7722 | 8.2923  |
| H | -10.1711 | -0.3257 | 8.0083  |
| H | -8.4206  | -0.1749 | 8.0732  |
| H | -9.4979  | 2.9715  | 9.7109  |

Diastereomer **IV**<sub>14</sub>

Charge = 0 Multiplicity = 1

Symbolic Z-Matrix:

|   |          |         |         |
|---|----------|---------|---------|
| C | -12.868  | 3.1067  | 8.8079  |
| C | -14.0704 | 3.5173  | 7.9584  |
| C | -14.9919 | 2.3589  | 7.6201  |
| C | -15.3528 | 1.5558  | 8.8505  |
| C | -14.1579 | 1.0438  | 9.6797  |
| C | -13.1766 | 2.2293  | 10.0573 |
| C | -13.5118 | 3.0528  | 11.3812 |
| C | -13.8971 | 2.0513  | 12.533  |
| C | -15.0136 | 1.0919  | 12.1144 |
| C | -14.5522 | 0.2388  | 10.9456 |
| C | -16.6525 | 1.3266  | 9.1133  |
| C | -12.2865 | 3.9549  | 11.8343 |
| C | -11.0302 | 3.2741  | 12.4221 |
| C | -10.2748 | 4.2325  | 13.3245 |
| C | -8.8241  | 4.2556  | 13.0258 |
| C | -14.6739 | 4.0507  | 11.1411 |
| C | -14.2778 | 2.6992  | 13.8725 |
| O | -10.7845 | 4.8792  | 14.2303 |
| O | -7.9467  | 5.0022  | 13.7489 |
| C | -6.592   | 4.9682  | 13.3202 |
| H | -12.1822 | 2.544   | 8.1608  |
| H | -12.3195 | 4.0123  | 9.0757  |
| H | -14.6476 | 4.3015  | 8.4553  |
| H | -13.7077 | 3.9691  | 7.0266  |
| H | -15.8865 | 2.7584  | 7.1259  |
| H | -14.5147 | 1.7064  | 6.8803  |
| H | -12.2299 | 1.7327  | 10.3002 |
| H | -13.0247 | 1.418   | 12.7357 |
| H | -15.2565 | 0.4221  | 12.9493 |
| H | -15.9351 | 1.6338  | 11.8825 |
| H | -13.6852 | -0.3429 | 11.2893 |
| H | -15.3169 | -0.5129 | 10.713  |
| H | -11.9911 | 4.6347  | 11.028  |
| H | -12.6736 | 4.6441  | 12.5981 |
| H | -14.9762 | 4.5539  | 12.0652 |
| H | -15.5648 | 3.5733  | 10.7307 |
| H | -14.3711 | 4.8557  | 10.465  |
| H | -14.4093 | 1.9271  | 14.6397 |
| H | -13.5018 | 3.3762  | 14.238  |
| H | -15.2207 | 3.2503  | 13.8097 |
| H | -6.4939  | 5.3533  | 12.2998 |
| H | -6.0108  | 5.6155  | 13.9836 |
| H | -6.1836  | 3.9547  | 13.3929 |
| H | -16.9952 | 0.7466  | 9.9617  |
| H | -17.4359 | 1.7172  | 8.4692  |
| C | -13.3955 | 0.0162  | 8.787   |
| H | -12.5386 | -0.4116 | 9.3215  |
| H | -14.0503 | -0.8151 | 8.4983  |
| H | -12.9985 | 0.453   | 7.8664  |
| C | -8.648   | 3.4495  | 11.9745 |
| C | -9.9095  | 2.8232  | 11.4611 |
| C | -9.7458  | 1.2853  | 11.447  |
| O | -9.7325  | 0.6389  | 10.4032 |
| O | -9.598   | 0.7671  | 12.6953 |
| C | -9.4556  | -0.6593 | 12.7729 |
| C | -10.8207 | -1.3214 | 12.7714 |
| O | -10.0657 | 3.3418  | 10.1469 |
| H | -11.3155 | 2.4643  | 13.0991 |
| H | -7.696   | 3.2648  | 11.4969 |
| H | -8.8228  | -1.0387 | 11.9625 |
| H | -8.9409  | -0.878  | 13.7141 |
| H | -10.7278 | -2.4025 | 12.9068 |
| H | -11.4469 | -0.9158 | 13.5729 |
| H | -11.3465 | -1.1325 | 11.8305 |
| H | -9.9855  | 2.5843  | 9.5321  |

## Diastereomer IV\_15

Charge = 0 Multiplicity = 1

Symbolic Z-Matrix:

|   |          |         |         |
|---|----------|---------|---------|
| C | -12.7303 | 2.2668  | 8.8625  |
| C | -13.7445 | 2.5691  | 7.7595  |
| C | -14.91   | 1.594   | 7.7254  |
| C | -15.5181 | 1.3872  | 9.0966  |
| C | -14.5269 | 0.9862  | 10.2049 |
| C | -13.3237 | 2.0056  | 10.2765 |
| C | -13.5396 | 3.3224  | 11.1616 |
| C | -14.2231 | 2.9468  | 12.5306 |
| C | -15.4824 | 2.0982  | 12.3292 |
| C | -15.1507 | 0.8021  | 11.6124 |
| C | -16.8477 | 1.5298  | 9.244   |
| C | -12.1485 | 4.0321  | 11.4354 |
| C | -11.068  | 3.1796  | 12.1384 |
| C | -10.5417 | 3.8501  | 13.3908 |
| C | -9.0605  | 3.8872  | 13.4239 |
| C | -14.3999 | 4.3783  | 10.4247 |
| C | -14.5935 | 4.1322  | 13.4374 |
| O | -11.2457 | 4.2707  | 14.2989 |
| O | -8.3726  | 4.4014  | 14.4788 |
| C | -6.9565  | 4.4139  | 14.3572 |
| H | -12.1692 | 1.373   | 8.5595  |
| H | -11.9863 | 3.0661  | 8.8811  |
| H | -14.1327 | 3.586   | 7.8553  |
| H | -13.2307 | 2.5453  | 6.7903  |
| H | -15.6544 | 1.9669  | 7.0106  |
| H | -14.5753 | 0.6307  | 7.3241  |
| H | -12.5375 | 1.4516  | 10.8055 |
| H | -13.5201 | 2.3332  | 13.1071 |
| H | -15.9137 | 1.8457  | 13.3066 |
| H | -16.2526 | 2.6642  | 11.7967 |
| H | -14.4474 | 0.2479  | 12.2507 |
| H | -16.0466 | 0.1703  | 11.5637 |
| H | -11.7722 | 4.4213  | 10.4855 |
| H | -12.3317 | 4.9425  | 12.019  |
| H | -14.5874 | 5.257   | 11.0504 |
| H | -15.3706 | 3.9879  | 10.1141 |
| H | -13.8855 | 4.7686  | 9.5426  |
| H | -14.9178 | 3.7662  | 14.4187 |
| H | -13.7522 | 4.8043  | 13.614  |
| H | -15.4221 | 4.7182  | 13.0274 |
| H | -6.6414  | 5.0281  | 13.5071 |
| H | -6.5427  | 4.858   | 15.2674 |
| H | -6.5621  | 3.3962  | 14.2675 |
| H | -17.3608 | 1.3758  | 10.1858 |
| H | -17.4827 | 1.8043  | 8.4058  |
| C | -13.983  | -0.4287 | 9.834   |
| H | -13.2735 | -0.7896 | 10.5887 |
| H | -14.799  | -1.1594 | 9.7749  |
| H | -13.4547 | -0.4534 | 8.8768  |
| C | -8.6468  | 3.3504  | 12.2717 |
| C | -9.7551  | 2.9157  | 11.3629 |
| C | -9.6144  | 1.4145  | 11.0196 |
| O | -9.5365  | 1.0117  | 9.8627  |
| O | -9.5887  | 0.6298  | 12.1305 |
| C | -9.4781  | -0.783  | 11.9009 |
| C | -8.0189  | -1.1786 | 11.7787 |
| O | -9.6134  | 3.7173  | 10.1951 |
| H | -11.4868 | 2.2352  | 12.5007 |
| H | -7.6114  | 3.2462  | 11.9796 |
| H | -9.9249  | -1.2833 | 12.7662 |
| H | -10.0534 | -1.0886 | 11.0194 |
| H | -7.9189  | -2.2613 | 11.6618 |
| H | -7.5498  | -0.6894 | 10.9192 |
| H | -7.4602  | -0.8657 | 12.6669 |
| H | -9.6732  | 3.1125  | 9.4277  |

Diastereomer IV<sub>16</sub>

Charge = 0 Multiplicity = 1

Symbolic Z-Matrix:

|   |          |         |         |
|---|----------|---------|---------|
| C | -12.7571 | 2.8503  | 8.8007  |
| C | -13.8901 | 3.24    | 7.8514  |
| C | -14.9047 | 2.1307  | 7.6354  |
| C | -15.3725 | 1.5349  | 8.9454  |
| C | -14.2536 | 1.0444  | 9.8851  |
| C | -13.1853 | 2.1853  | 10.1422 |
| C | -13.4914 | 3.2103  | 11.326  |
| C | -13.9974 | 2.4148  | 12.5859 |
| C | -15.1747 | 1.4948  | 12.2538 |
| C | -14.7502 | 0.455   | 11.2313 |
| C | -16.6945 | 1.4495  | 9.1814  |
| C | -12.2111 | 4.0675  | 11.7065 |
| C | -11.0466 | 3.3937  | 12.4662 |
| C | -10.1921 | 4.4311  | 13.1759 |
| C | -8.7449  | 4.1565  | 13.0036 |
| C | -14.5563 | 4.2539  | 10.9001 |
| C | -14.3714 | 3.2741  | 13.8032 |
| O | -10.6415 | 5.3496  | 13.8486 |
| O | -7.6633  | 4.785   | 13.5529 |
| C | -7.9555  | 5.8804  | 14.4126 |
| H | -12.105  | 2.146   | 8.2673  |
| H | -12.1356 | 3.7329  | 8.967   |
| H | -14.4072 | 4.1337  | 8.2099  |
| H | -13.4588 | 3.5228  | 6.883   |
| H | -15.745  | 2.5353  | 7.0571  |
| H | -14.4687 | 1.3446  | 7.0084  |
| H | -12.2965 | 1.6489  | 10.4924 |
| H | -13.1858 | 1.7532  | 12.9136 |
| H | -15.4977 | 0.968   | 13.1609 |
| H | -16.0408 | 2.069   | 11.9121 |
| H | -13.9436 | -0.1386 | 11.6859 |
| H | -15.5673 | -0.2595 | 11.0712 |
| H | -11.8191 | 4.5865  | 10.8252 |
| H | -12.5682 | 4.8967  | 12.3338 |
| H | -14.8461 | 4.9035  | 11.7324 |
| H | -15.4705 | 3.7964  | 10.5193 |
| H | -14.1636 | 4.9304  | 10.1355 |
| H | -14.5852 | 2.6315  | 14.6653 |
| H | -13.5599 | 3.9421  | 14.1021 |
| H | -15.2681 | 3.8743  | 13.6227 |
| H | -8.4655  | 6.682   | 13.8688 |
| H | -8.5336  | 5.5545  | 15.2831 |
| H | -7.0044  | 6.2804  | 14.7772 |
| H | -17.1112 | 1.0198  | 10.0844 |
| H | -17.4213 | 1.8115  | 8.459   |
| C | -13.56   | -0.1554 | 9.1686  |
| H | -12.7647 | -0.5805 | 9.7918  |
| H | -14.2785 | -0.9583 | 8.9625  |
| H | -13.095  | 0.1176  | 8.2173  |
| C | -8.6631  | 3.1328  | 12.1543 |
| C | -9.98    | 2.621   | 11.6586 |
| C | -10.052  | 1.1043  | 11.9795 |
| O | -10.2022 | 0.6185  | 13.092  |
| O | -9.8765  | 0.3862  | 10.8261 |
| C | -9.9073  | -1.042  | 10.9725 |
| C | -8.528   | -1.5605 | 11.3323 |
| O | -10.0181 | 2.9392  | 10.2778 |
| H | -11.4323 | 2.7848  | 13.2901 |
| H | -7.7169  | 2.7223  | 11.8273 |
| H | -10.659  | -1.3501 | 11.7082 |
| H | -10.215  | -1.455  | 10.0063 |
| H | -8.5266  | -2.6527 | 11.3881 |
| H | -7.7918  | -1.2437 | 10.5862 |
| H | -8.1962  | -1.161  | 12.2958 |
| H | -9.6506  | 2.1697  | 9.8026  |

## Diastereomer IV\_17

Charge = 0 Multiplicity = 1

Symbolic Z-Matrix:

|   |          |         |         |
|---|----------|---------|---------|
| C | -12.7118 | 1.8556  | 8.9635  |
| C | -13.7138 | 2.1063  | 7.8366  |
| C | -14.9604 | 1.2409  | 7.9307  |
| C | -15.5597 | 1.2497  | 9.3212  |
| C | -14.5863 | 0.9048  | 10.4637 |
| C | -13.3035 | 1.8239  | 10.4023 |
| C | -13.4062 | 3.257   | 11.1162 |
| C | -14.0991 | 3.1166  | 12.5207 |
| C | -15.4162 | 2.3383  | 12.4412 |
| C | -15.1941 | 0.9433  | 11.889  |
| C | -16.8717 | 1.5133  | 9.4599  |
| C | -11.9607 | 3.8887  | 11.2871 |
| C | -10.928  | 3.0859  | 12.1152 |
| C | -10.606  | 3.7885  | 13.4214 |
| C | -9.167   | 4.1095  | 13.5503 |
| C | -14.1937 | 4.2738  | 10.2517 |
| C | -14.3912 | 4.4407  | 13.2489 |
| O | -11.4284 | 4.0448  | 14.29   |
| O | -8.6646  | 4.7685  | 14.6291 |
| C | -7.2617  | 4.9966  | 14.6245 |
| H | -12.2379 | 0.8849  | 8.7698  |
| H | -11.8966 | 2.5778  | 8.8789  |
| H | -14.0105 | 3.1573  | 7.8041  |
| H | -13.2197 | 1.9161  | 6.8755  |
| H | -15.6831 | 1.5903  | 7.1824  |
| H | -14.7172 | 0.2112  | 7.6444  |
| H | -12.5551 | 1.2781  | 10.991  |
| H | -13.4283 | 2.5409  | 13.1708 |
| H | -15.8446 | 2.2425  | 13.4474 |
| H | -16.1559 | 2.8866  | 11.8499 |
| H | -14.5212 | 0.4211  | 12.5845 |
| H | -16.1352 | 0.3801  | 11.9278 |
| H | -11.5749 | 4.0795  | 10.2829 |
| H | -12.062  | 4.8939  | 11.7158 |
| H | -14.3066 | 5.2372  | 10.7599 |
| H | -15.1953 | 3.9233  | 9.9971  |
| H | -13.6619 | 4.5089  | 9.3261  |
| H | -14.6808 | 4.2407  | 14.2871 |
| H | -13.5279 | 5.1072  | 13.2798 |
| H | -15.2212 | 4.9852  | 12.7864 |
| H | -6.7106  | 4.0502  | 14.6132 |
| H | -6.9696  | 5.6254  | 13.7768 |
| H | -7.0023  | 5.528   | 15.5449 |
| H | -17.3791 | 1.5121  | 10.4173 |
| H | -17.4979 | 1.7352  | 8.5999  |
| C | -14.1722 | -0.5855 | 10.2629 |
| H | -13.4827 | -0.9134 | 11.0501 |
| H | -15.0484 | -1.2446 | 10.3006 |
| H | -13.6683 | -0.7716 | 9.3105  |
| C | -8.5794  | 3.6266  | 12.4524 |
| C | -9.5114  | 2.9433  | 11.5008 |
| C | -9.1421  | 1.4397  | 11.4104 |
| O | -8.6803  | 0.7623  | 12.3181 |
| O | -9.4475  | 0.9738  | 10.1589 |
| C | -9.1068  | -0.4002 | 9.914   |
| C | -10.2309 | -1.3137 | 10.3629 |
| O | -9.3401  | 3.616   | 10.2614 |
| H | -11.3096 | 2.1025  | 12.4079 |
| H | -7.5218  | 3.6974  | 12.241  |
| H | -8.9567  | -0.5045 | 8.8345  |
| H | -8.1587  | -0.6645 | 10.3964 |
| H | -9.9836  | -2.3599 | 10.1622 |
| H | -10.4328 | -1.1991 | 11.4324 |
| H | -11.1563 | -1.0665 | 9.8355  |
| H | -9.6572  | 3.0066  | 9.5678  |



## Diastereomer IV\_18

Charge = 0 Multiplicity = 1

Symbolic Z-Matrix:

|   |          |         |         |
|---|----------|---------|---------|
| C | -12.6887 | 1.9301  | 8.9594  |
| C | -13.6771 | 2.1424  | 7.8128  |
| C | -14.8949 | 1.2371  | 7.8929  |
| C | -15.5228 | 1.2533  | 9.2701  |
| C | -14.5653 | 0.9522  | 10.4388 |
| C | -13.302  | 1.8977  | 10.3899 |
| C | -13.4386 | 3.3333  | 11.0889 |
| C | -14.1802 | 3.2069  | 12.472  |
| C | -15.4801 | 2.4054  | 12.3607 |
| C | -15.2095 | 1.0035  | 11.8472 |
| C | -16.8437 | 1.4865  | 9.3755  |
| C | -12.     | 3.9658  | 11.3104 |
| C | -11.0176 | 3.1649  | 12.199  |
| C | -10.6191 | 3.9535  | 13.4312 |
| C | -9.1501  | 4.0641  | 13.5763 |
| C | -14.1965 | 4.3378  | 10.186  |
| C | -14.512  | 4.5379  | 13.1688 |
| O | -11.4108 | 4.4211  | 14.2384 |
| O | -8.5718  | 4.7184  | 14.6193 |
| C | -7.1507  | 4.7408  | 14.6325 |
| H | -12.1873 | 0.9699  | 8.7836  |
| H | -11.8939 | 2.6752  | 8.8795  |
| H | -14.0078 | 3.1829  | 7.7684  |
| H | -13.16   | 1.9617  | 6.8621  |
| H | -15.6117 | 1.5492  | 7.1228  |
| H | -14.6116 | 0.2111  | 7.6315  |
| H | -12.5524 | 1.3733  | 10.9963 |
| H | -13.5285 | 2.6545  | 13.1598 |
| H | -15.9439 | 2.322   | 13.3522 |
| H | -16.2057 | 2.929   | 11.7309 |
| H | -14.5421 | 0.5127  | 12.5703 |
| H | -16.137  | 0.4177  | 11.8745 |
| H | -11.5622 | 4.15    | 10.3263 |
| H | -12.1223 | 4.9749  | 11.7237 |
| H | -14.3308 | 5.3066  | 10.6782 |
| H | -15.1869 | 3.9783  | 9.9001  |
| H | -13.632  | 4.5637  | 9.2773  |
| H | -14.8447 | 4.3499  | 14.1963 |
| H | -13.6533 | 5.2083  | 13.2286 |
| H | -15.3245 | 5.0708  | 12.664  |
| H | -6.7432  | 3.7266  | 14.6996 |
| H | -6.7587  | 5.2587  | 13.7508 |
| H | -6.8294  | 5.2938  | 15.5201 |
| H | -17.3731 | 1.4886  | 10.3209 |
| H | -17.4558 | 1.6786  | 8.4982  |
| C | -14.1058 | -0.53   | 10.2748 |
| H | -13.4262 | -0.8248 | 11.0836 |
| H | -14.9644 | -1.2122 | 10.3028 |
| H | -13.5721 | -0.7177 | 9.3389  |
| C | -8.6239  | 3.4225  | 12.5291 |
| C | -9.6316  | 2.8272  | 11.595  |
| C | -9.4581  | 1.286   | 11.5644 |
| O | -9.1218  | 0.5859  | 12.5091 |
| O | -9.7877  | 0.8219  | 10.3191 |
| C | -9.7139  | -0.6023 | 10.1473 |
| C | -8.3031  | -1.0103 | 9.7683  |
| O | -9.3787  | 3.4335  | 10.3364 |
| H | -11.48   | 2.2533  | 12.5932 |
| H | -7.5642  | 3.324   | 12.34   |
| H | -10.0597 | -1.1297 | 11.0436 |
| H | -10.4026 | -0.8623 | 9.3368  |
| H | -8.2485  | -2.0857 | 9.577   |
| H | -7.9762  | -0.4746 | 8.8711  |
| H | -7.5943  | -0.7604 | 10.5641 |
| H | -9.7358  | 2.8283  | 9.6589  |

Diastereomer **IV**<sub>19</sub>

Charge = 0 Multiplicity = 1

Symbolic Z-Matrix:

|   |          |         |         |
|---|----------|---------|---------|
| C | -12.8864 | 3.1288  | 8.7684  |
| C | -14.0588 | 3.5792  | 7.8972  |
| C | -15.0229 | 2.4563  | 7.5574  |
| C | -15.4325 | 1.6786  | 8.7892  |
| C | -14.2707 | 1.1284  | 9.6401  |
| C | -13.25   | 2.2784  | 10.0216 |
| C | -13.5723 | 3.1287  | 11.3321 |
| C | -14.0168 | 2.1571  | 12.4878 |
| C | -15.1607 | 1.2349  | 12.0599 |
| C | -14.7114 | 0.3519  | 10.9085 |
| C | -16.7437 | 1.5007  | 9.0342  |
| C | -12.3185 | 3.9849  | 11.7966 |
| C | -11.1083 | 3.2645  | 12.432  |
| C | -10.3119 | 4.2203  | 13.3013 |
| C | -8.8576  | 4.1413  | 13.0308 |
| C | -14.6885 | 4.1704  | 11.0622 |
| C | -14.3982 | 2.8364  | 13.8116 |
| O | -10.7966 | 4.9404  | 14.1644 |
| O | -7.948   | 4.8646  | 13.7376 |
| C | -6.5908  | 4.727   | 13.3389 |
| H | -12.2156 | 2.531   | 8.1372  |
| H | -12.3035 | 4.013   | 9.0352  |
| H | -14.6099 | 4.3921  | 8.377   |
| H | -13.6645 | 4.0052  | 6.9661  |
| H | -15.8941 | 2.8875  | 7.0482  |
| H | -14.5635 | 1.7783  | 6.8293  |
| H | -12.3288 | 1.7462  | 10.2848 |
| H | -13.1724 | 1.4944  | 12.7144 |
| H | -15.4427 | 0.5842  | 12.8977 |
| H | -16.0571 | 1.8081  | 11.8061 |
| H | -13.8695 | -0.2553 | 11.272  |
| H | -15.4986 | -0.3749 | 10.6722 |
| H | -11.9723 | 4.6327  | 10.9842 |
| H | -12.6922 | 4.707   | 12.5365 |
| H | -14.9855 | 4.6955  | 11.9757 |
| H | -15.5914 | 3.7249  | 10.6418 |
| H | -14.3418 | 4.9551  | 10.3835 |
| H | -14.5677 | 2.0802  | 14.587  |
| H | -13.6071 | 3.4937  | 14.1808 |
| H | -15.3215 | 3.4167  | 13.7249 |
| H | -6.4505  | 5.0584  | 12.3045 |
| H | -5.9818  | 5.3664  | 13.9847 |
| H | -6.2485  | 3.6944  | 13.4647 |
| H | -17.1202 | 0.9408  | 9.8818  |
| H | -17.5022 | 1.9149  | 8.3752  |
| C | -13.5371 | 0.0633  | 8.7674  |
| H | -12.7047 | -0.3923 | 9.3173  |
| H | -14.22   | -0.7448 | 8.4777  |
| H | -13.1115 | 0.4751  | 7.8481  |
| C | -8.714   | 3.2793  | 12.0197 |
| C | -10.0033 | 2.7091  | 11.5093 |
| C | -9.9317  | 1.1646  | 11.5601 |
| O | -9.9441  | 0.4758  | 10.5439 |
| O | -9.8183  | 0.6915  | 12.8299 |
| C | -9.739   | -0.7354 | 12.9662 |
| C | -8.2975  | -1.1909 | 12.8411 |
| O | -10.1078 | 3.1845  | 10.1738 |
| H | -11.4465 | 2.5039  | 13.1413 |
| H | -7.7673  | 3.0153  | 11.5695 |
| H | -10.1193 | -0.9831 | 13.9625 |
| H | -10.3852 | -1.2408 | 12.2394 |
| H | -8.2163  | -2.2697 | 13.0008 |
| H | -7.8946  | -0.9525 | 11.8518 |
| H | -7.667   | -0.6765 | 13.5738 |
| H | -10.0545 | 2.4009  | 9.5894  |

## Diastereomer IV\_20

Charge = 0 Multiplicity = 1

Symbolic Z-Matrix:

|   |          |         |         |
|---|----------|---------|---------|
| C | -13.177  | 1.2426  | 9.233   |
| C | -14.1703 | 1.3725  | 8.0782  |
| C | -15.5789 | 0.9214  | 8.4317  |
| C | -16.0557 | 1.5092  | 9.7431  |
| C | -15.1152 | 1.2923  | 10.9436 |
| C | -13.6573 | 1.7937  | 10.606  |
| C | -13.3564 | 3.3433  | 10.8345 |
| C | -13.925  | 3.7874  | 12.2354 |
| C | -15.4045 | 3.4153  | 12.3953 |
| C | -15.5962 | 1.9126  | 12.2823 |
| C | -17.2464 | 2.1343  | 9.7809  |
| C | -11.8042 | 3.6427  | 10.728  |
| C | -10.7558 | 2.6836  | 11.3356 |
| C | -10.747  | 2.6251  | 12.8476 |
| C | -9.5987  | 3.3703  | 13.4205 |
| C | -14.0029 | 4.232   | 9.7365  |
| C | -13.7587 | 5.2714  | 12.6004 |
| O | -11.5498 | 1.9891  | 13.5159 |
| O | -9.3352  | 3.6978  | 14.7195 |
| C | -10.3819 | 3.423   | 15.6439 |
| H | -12.9505 | 0.1754  | 9.3572  |
| H | -12.227  | 1.6933  | 8.9311  |
| H | -14.2066 | 2.4009  | 7.7112  |
| H | -13.8073 | 0.777   | 7.2311  |
| H | -16.2482 | 1.1942  | 7.6058  |
| H | -15.6137 | -0.1726 | 8.4869  |
| H | -13.0249 | 1.2895  | 11.3499 |
| H | -13.3916 | 3.2358  | 13.0104 |
| H | -15.7553 | 3.7267  | 13.3879 |
| H | -16.0277 | 3.9541  | 11.6757 |
| H | -15.0389 | 1.4543  | 13.1123 |
| H | -16.6465 | 1.6609  | 12.4761 |
| H | -11.566  | 3.6941  | 9.6561  |
| H | -11.6112 | 4.6557  | 11.097  |
| H | -13.8234 | 5.2958  | 9.9238  |
| H | -15.0817 | 4.0943  | 9.6554  |
| H | -13.5642 | 4.0445  | 8.7536  |
| H | -14.1187 | 5.4493  | 13.6209 |
| H | -12.7139 | 5.5889  | 12.5844 |
| H | -14.3361 | 5.927   | 11.9424 |
| H | -10.5098 | 2.3444  | 15.7769 |
| H | -10.0912 | 3.8436  | 16.6114 |
| H | -11.3187 | 3.902   | 15.3398 |
| H | -17.6633 | 2.5606  | 10.6855 |
| H | -17.8595 | 2.2362  | 8.8896  |
| C | -15.0833 | -0.2435 | 11.2184 |
| H | -14.438  | -0.4786 | 12.0735 |
| H | -16.0866 | -0.6211 | 11.451  |
| H | -14.7033 | -0.8276 | 10.3756 |
| C | -8.7938  | 3.6441  | 12.3937 |
| C | -9.2915  | 3.1418  | 11.0773 |
| C | -8.4207  | 1.968   | 10.5691 |
| O | -7.7953  | 2.0206  | 9.5141  |
| O | -8.4341  | 0.9097  | 11.4228 |
| C | -7.6338  | -0.2029 | 11.005  |
| C | -7.7606  | -1.2932 | 12.0507 |
| O | -9.2151  | 4.2463  | 10.1778 |
| H | -10.8925 | 1.6654  | 10.9578 |
| H | -7.8548  | 4.1702  | 12.5006 |
| H | -7.992   | -0.573  | 10.0379 |
| H | -6.5868  | 0.108   | 10.9176 |
| H | -8.8062  | -1.5979 | 12.1647 |
| H | -7.1651  | -2.1684 | 11.7763 |
| H | -7.4266  | -0.9301 | 13.0284 |
| H | -8.6468  | 3.9648  | 9.4317  |
